# Supplementary material for: BF3·OEt2 catalyzed S–H insertion reactions of α-diazo imidamides and enolizable thioamides under metal-free conditions
Source: Royal Society of Chemistry journal article supplement (doi:10.1039/d2nj04964c), 2022-01-01

**BF<sub>3</sub>·OEt<sub>2</sub> Catalyzed S-H insertion reactions of  
α-diazo imidamides and enolizable thioamides under metal-free conditions**

**Supporting Information**

**CONTENTS**

|    |                                                                                                                                               |     |
|----|-----------------------------------------------------------------------------------------------------------------------------------------------|-----|
| 1. | General information                                                                                                                           | S2  |
| 2. | General procedure for the synthesis of carbamimidothioates<br><b>3a-i</b> / carbamimidothioates <b>6a-m</b> / carbamimidothioates <b>8a-f</b> | S2  |
| 3. | Spectral data for carbamimidothioates <b>3a-i</b>                                                                                             | S3  |
| 4. | Spectral data for carbamimidothioates <b>6a-m</b>                                                                                             | S7  |
| 5. | Spectral data for carbamimidothioates <b>8a-f</b>                                                                                             | S14 |
| 6. | General procedure for the alkylation and acylation of<br>carbamimidothioates <b>14a-c</b>                                                     | S15 |
| 7. | Spectral data for carbamimidothioates <b>14a-dc</b>                                                                                           | S16 |
| 8. | Crystal data for compound <b>6c</b>                                                                                                           | S17 |
| 9. | HPLC chromatogram for <b>6m</b>                                                                                                               | S19 |

## 1. General information

Melting points were determined on a capillary melting point apparatus and uncorrected. IR spectra were recorded using ATR technique on a Bruker Alpha FT-IR spectrophotometer. All compounds were fully characterized. Proton nuclear magnetic resonance ( $^1\text{H-NMR}$ ) spectra were recorded at 400 MHz using  $\text{CDCl}_3$  in ppm ( $\delta$ ) related to tetramethylsilane ( $\delta=0.00$ ) as an internal standard and are reported as follows; chemical shift (ppm), multiplicity (br = broad, s = singlet, d = doublet, t = triplet, q = quartet, dd = doublet of doublet, m = multiplet), coupling constant ( $J$ ) values are given in parts per million and Hertz (Hz). Carbon-13 nuclear magnetic resonance ( $^{13}\text{C-NMR}$ ) spectra were recorded at 100 MHz in  $\text{CDCl}_3$ . Chemical shifts are reported in delta ( $\delta$ ) units, parts per million (ppm) relative to the center of the triplet at 77.7 ppm for  $\text{CDCl}_3$ . Carbon types were determined from  $^{13}\text{C}$  NMR and DEPT experiments. The residual solvent signals were used as references and the chemical shifts converted to the TMS scale ( $\text{CDCl}_3$ :  $\delta_{\text{H}} = 7.26$  ppm,  $\delta_{\text{C}} = 77.7$  ppm). High resolution mass analyses were performed using electrospray ionization (ESI) technique on a Thermo Exactive Orbitrap mass spectrometer. All solvents were purified by distillation following standard procedure. Thin layer chromatography was performed on silica or alumina plates and components visualized by observation under iodine/UV light at 254 nm. Column chromatography was performed on silica gel (100-200 mesh). All the reactions were conducted in oven-dried glassware with magnetic stirring. Reagents were added via syringes through septa. Indoles,  $\text{NaN}_3$ ,  $\text{TsCl}$ ,  $\text{BF}_3\cdot\text{OEt}_2$ , 2-mercaptobenzimidazoles, thiourea, thiosemicarbazones and other commercial chemicals were purchased from M/s Sigma Aldrich, Alfa Aesar and used as provided.

## Experimental Section

### 2. General procedure for products 3, 6 and 8

To an oven-dried RB flask, a solution containing the appropriate 1 mmol of thiourea **2**, thiosemicarbazones **5** or mercaptobenzimidazole **7** in DCM was stirred for 5 min to obtain a homogeneous mixture and a drop of  $\text{BF}_3\cdot\text{OEt}_2$  was added and allowed to stir at room temperature. To this reaction mixture, a solution of 3-diazoindol-2-imine **1** (1.2 mmol) in DCM (4 mL) was added through syringe pump with the addition rate of 5 mL/h at ambient temperature to afford until the reaction completed (monitored using TLC). After the completion of reaction, the solvent was removed under reduced pressure and diluted with ethyl acetate (10 mL) and

water (15 mL). The organic phase was separated and the aqueous layer washed with ethyl acetate (10 mL). Concentration of combined organic layers under reduced pressure afforded the crude product, which was purified by column chromatography using silica gel (100-200 mesh, EtOAc/hexane 30:70) to furnish carbamimidothioates **3a-i** / **6a-k** / **8a-f**.

### 3. Characterization data for products 3a-i

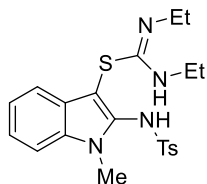

#### 1-Methyl-2-[(4-methylbenzene-1-sulfonyl)amino]-1H-indol-3-yl *N,N'*-diethylcarbamimidothioate (**3a**)

White solid; Yield: 84%;  $R_f = 0.24$  (EtOAc/hexane = 3:1); m.p. 158-160 °C; IR (neat):  $\nu_{\max} = 3254, 3176, 3047, 2978, 2929, 1623, 1494, 1370, 1233, 1125, 1091 \text{ cm}^{-1}$ .  $^1\text{H NMR}$  (400 MHz,  $\text{CDCl}_3$ )  $\delta = 8.94$  (s, 1H), 7.76 (d,  $J = 8 \text{ Hz}$ , 2H), 7.31-7.30 (m, 1H), 7.24-7.16 (m, 5H), 3.77 (br s, 2H), 3.47 (br s, 2H), 3.29 (s, 3H), 1.90 (br s, 1H), 2.42 (s, 3H), 1.46 (br s, 3H), 1.09 (br s, 3H);  $^{13}\text{C NMR}$  (100 MHz,  $\text{CDCl}_3$ )  $\delta = 168.1, 153.0, 144.7, 140.2, 135.1, 129.0, 128.9, 125.7, 120.9, 120.7, 116.1, 109.1, 75.5, 39.7, 39.0, 29.2, 21.4, 15.0, 13.3 \text{ ppm}$ ; HRMS (ESI) Calcd for  $\text{C}_{21}\text{H}_{26}\text{N}_4\text{O}_2\text{S}_2$   $[\text{M}+\text{H}]^+$ ; 431.1575, found: 431.1563.

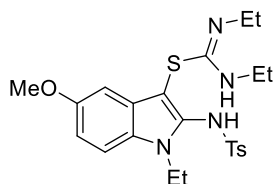

#### 1-Ethyl-2-[(4-methylbenzene-1-sulfonyl)amino]-5-methoxy-1H-indol-3-yl *N,N'*-diethylcarbamimidothioate (**3b**)

White solid; Yield: 93%;  $R_f = 0.31$  (EtOAc/hexane = 3:1); m.p. 161-162 °C; IR (neat):  $\nu_{\max} = 3253, 3175, 3040, 2979, 2930, 1623, 1483, 1380, 1218, 1125, 1089 \text{ cm}^{-1}$ ;  $^1\text{H NMR}$  (400 MHz,  $\text{CDCl}_3$ )  $\delta = 8.86$ -8.77 (br s, 1H), 7.77 (d,  $J = 7.6 \text{ Hz}$ , 2H), 7.21 (d,  $J = 7.6 \text{ Hz}$ , 2H), 7.09 (d,  $J = 8.4 \text{ Hz}$ , 1H), 6.77 (d,  $J = 7.2 \text{ Hz}$ , 2H), 4.76 (br s, 1H), 3.95-3.94 (m, 2H), 3.86 (s, 3H), 3.67 (br s, 2H), 3.39 (br s, 2H), 2.40 (s, 3H), 1.40 (br s, 3H), 1.22 (t,  $J = 6.8 \text{ Hz}$ , 3H), 1.05 (br s, 3H);  $^{13}\text{C NMR}$  (100 MHz,  $\text{CDCl}_3$ )  $\delta = 168.1, 155.0, 152.7, 144.9, 140.1, 130.2, 129.0, 128.8, 125.5,$

110.0, 109.0, 100.0, 74.8, 56.0, 39.7, 39.0, 37.4, 21.4, 15.0, 14.3, 13.3 ppm; HRMS (ESI) Calcd for  $C_{23}H_{30}N_4O_3S_2$   $[M+H]^+$ ; 475.1837, found: 475.1834.

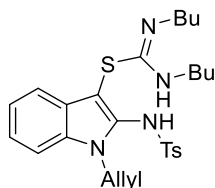

**1-Allyl-2-[(4-methylbenzene-1-sulfonyl)amino]-1H-indol-3-yl *N,N'*-dibutylcarbamide thioate (3c)**

White solid; Yield: 90%;  $R_f = 0.31$  (EtOAc/hexane = 3:1); m.p. 153-154 °C; IR (neat):  $\nu_{max} = 3258, 3169, 3045, 2928, 2869, 1626, 1495, 1372, 1224, 1125, 1091$   $cm^{-1}$ ;  $^1H$  NMR (400 MHz,  $CDCl_3$ )  $\delta = 8.74$  (br s, 1H), 7.64 (d,  $J = 8$  Hz, 2H), 7.13-6.99 (m, 6H), 5.59-5.50 (m, 1H), 4.93-4.80 (m, 3H), 4.44 (s, 2H), 3.53 (br s, 2H), 3.25 (br s, 2H), 2.30 (s, 3H), 1.68 (br s, 2H), 1.47-1.18 (m, 4H), 0.88-0.79 (m, 6H), 0.55 (br s, 2H);  $^{13}C$  NMR (100 MHz,  $CDCl_3$ )  $\delta = 168.2, 152.4, 144.6, 140.2, 134.4, 133.5, 128.9, 128.9, 125.7, 120.8, 120.7, 116.3, 115.9, 109.9, 75.4, 45.0, 44.5, 43.5, 31.6, 29.8, 21.4, 19.9, 19.3, 13.6, 13.4$  ppm; HRMS (ESI) Calcd for  $C_{27}H_{36}N_4O_2S_2$   $[M+H]^+$ ; 513.2357, found: 513.2360.

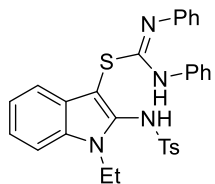

**1-Ethyl-2-[(4-methylbenzene-1-sulfonyl)amino]-1H-indol-3-yl *N,N'*-diphenylcarbamide thioate (3d)**

White solid; Yield: 84%;  $R_f = 0.27$  (EtOAc/hexane = 3:1); m.p. 139-141 °C; IR (neat):  $\nu_{max} = 3249, 3204, 3041, 2975, 2927, 1619, 1570, 1494, 1365, 1217, 1120, 1093$   $cm^{-1}$ ;  $^1H$  NMR (400 MHz,  $CDCl_3$ )  $\delta = 7.62$  (d,  $J = 7.2$  Hz, 1H), 7.56-7.51 (m, 3H), 7.43-7.40 (m, 1H), 7.30-7.27 (m, 5H), 7.10-7.04 (m, 8H), 6.41 (br s, 1H), 4.54 (q,  $J = 7.2$  Hz, 2H), 2.28 (s, 3H), 1.7 (br s, 1H), 1.51 (t,  $J = 7.2$  Hz, 3H);  $^{13}C$  NMR (100 MHz,  $CDCl_3$ )  $\delta = 144.9, 134.8, 129.9, 128.8, 127.6, 127.5, 124.1, 123.2, 121.9, 120.5, 119.5, 111.2, 94.1, 39.4, 21.7, 14.7$  ppm; HRMS (ESI) Calcd for  $C_{30}H_{28}N_4O_2S_2$   $[M+H]^+$ ; 541.1731, found: 541.1732.

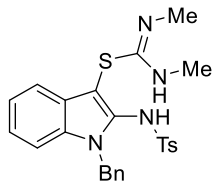

**1-Benzyl-2-[(4-methylbenzene-1-sulfonyl)amino]-1H-indol-3-yl *N,N'*-dimethylcarbamimidothioate (3e)**

White solid; Yield: 92%;  $R_f = 0.32$  (EtOAc/hexane = 3:1); m.p. 152-153 °C; IR (neat):  $\nu_{\max} = 3458, 3324, 3178, 3060, 2927, 1633, 1495, 1376, 1226, 1125, 1091 \text{ cm}^{-1}$ ;  $^1\text{H NMR}$  (400 MHz,  $\text{CDCl}_3$ )  $\delta = 7.71$  (d,  $J = 8 \text{ Hz}$ , 2H), 7.32-7.21 (m, 4H), 7.14-7.05 (m, 7H), 5.09 (s, 2H), 5.00 (br s, 1H), 3.35 (br s, 3H), 3.04 (br s, 3H), 2.37 (s, 3H), 1.94 (br s, 1H);  $^{13}\text{C NMR}$  (100 MHz,  $\text{CDCl}_3$ )  $\delta = 170.3, 153.3, 144.4, 140.4, 137.6, 134.5, 129.4, 129.0, 128.4, 127.0, 126.9, 125.5, 121.0, 120.9, 116.1, 110.0, 74.3, 46.1, 30.7, 30.6, 21.4 \text{ ppm}$ ; HRMS (ESI) Calcd for  $\text{C}_{25}\text{H}_{26}\text{N}_4\text{O}_2\text{S}_2$   $[\text{M}+\text{H}]^+$ ; 479.1575; found: 479.1571.

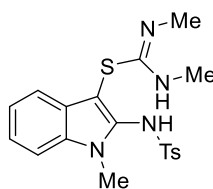

**1-Methyl-2-[(4-methylbenzene-1-sulfonyl)amino]-1H-indol-3-yl *N,N'*-dimethylcarbamimidothioate (3f)**

White solid; Yield: 93%;  $R_f = 0.34$  (EtOAc/hexane = 3:1); m.p. 152-154 °C; IR (neat):  $\nu_{\max} = 3458, 3324, 3178, 3060, 2927, 1633, 1495, 1376, 1226, 1125, 1091 \text{ cm}^{-1}$ ;  $^1\text{H NMR}$  (400 MHz,  $\text{CDCl}_3$ )  $\delta = 7.73$  (d,  $J = 8 \text{ Hz}$ , 2H), 7.30-7.26 (m, 1H), 7.21-7.12 (m, 5H), 3.34 (br s, 3H), 3.25 (s, 3H), 3.00 (br s, 3H), 2.38 (s, 3H), 1.82 (br s, 1H);  $^{13}\text{C NMR}$  (100 MHz,  $\text{CDCl}_3$ )  $\delta = 170.3, 153.1, 144.6, 140.4, 135.2, 129.1, 125.6, 121.0, 120.8, 116.3, 109.1, 75.7, 30.8, 29.2, 21.4 \text{ ppm}$ ; HRMS (ESI) Calcd for  $\text{C}_{19}\text{H}_{22}\text{N}_4\text{O}_2\text{S}_2$   $[\text{M}+\text{H}]^+$ ; 403.1262 found: 403.1263.

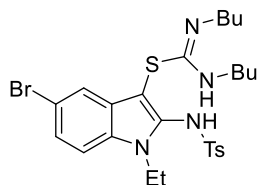

**1-Ethyl-2-[(4-methylbenzene-1-sulfonyl)amino]-5-bromo-1H-indol-3-yl *N,N'*-dibutylcarbamimidothioate (3g)**

White solid; Yield: 96%;  $R_f = 0.24$  (EtOAc/hexane = 3:1); m.p. 167-168 °C; IR (neat):  $\nu_{\max} = 3458, 3324, 3178, 3060, 2927, 1633, 1495, 1376, 1226, 1125, 1091 \text{ cm}^{-1}$ ;  $^1\text{H NMR}$  (400 MHz,

CDCl<sub>3</sub>)  $\delta$  = 8.84 (br s, 1H), 7.78 (d,  $J$  = 8 Hz, 2H), 7.31-7.30 (m, 1H), 7.24-7.19 (m, 3H), 7.08-7.06 (m, 1H), 6.88 (br s, 1H), 3.90-3.89 (m, 2H), 3.65 (br s, 2H), 3.35 (br s, 2H), 2.42 (s, 3H), 1.79 (br s, 2H), 1.44-1.35 (m, 4H), 1.11 (t,  $J$  = 7.2 Hz, 3H), 1.00 (br s, 6H), 0.69 (br s, 2H); <sup>13</sup>C NMR (100 MHz, CDCl<sub>3</sub>)  $\delta$  = 168.3, 153.1, 144.7, 140.3, 134.7, 129.0, 128.3, 125.5, 123.4, 117.0, 113.7, 112.0, 74.9, 44.5, 43.6, 37.3, 31.7, 29.9, 21.4, 19.9, 19.4, 14.2, 13.7, 13.4 ppm; HRMS (ESI) Calcd for C<sub>26</sub>H<sub>35</sub><sup>81</sup>BrN<sub>4</sub>O<sub>2</sub>S<sub>2</sub> [M+H]<sup>+</sup>; 581.1446, found: 581.1442.

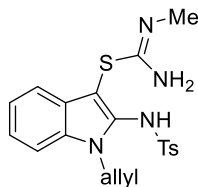

**1-Allyl-2-[(4-methylbenzene-1-sulfonyl)amino]-1H-indol-3-yl N-methylcarbamimidothioate (3h)**

White solid; Yield: 67%;  $R_f$  = 0.21 (EtOAc/hexane = 3:1); m.p. 129-131 °C; IR (neat):  $\nu_{\max}$  = 3383, 3054, 2925, 1648, 1496, 1374, 1224, 1125, 1089 cm<sup>-1</sup>; <sup>1</sup>H NMR (400 MHz, CDCl<sub>3</sub>)  $\delta$  = 10.0 (br s, 1H), 7.71 (d,  $J$  = 7.6 Hz, 2H), 7.42-7.30 (m, 1H), 7.21-7.16 (m, 5H), 5.50-5.43 (m, 1H), 4.92 (br s, 1H), 4.77-4.69 (m, 2H), 4.43 (br s, 2H), 3.19 (s, 3H), 3.03 (br s, 1H), 2.41 (s, 3H); <sup>13</sup>C NMR (100 MHz, CDCl<sub>3</sub>)  $\delta$  = 173.5, 150.0, 143.4, 140.8, 134.3, 133.1, 129.6, 129.1, 128.4, 125.8, 121.5, 121.2, 116.8, 116.1, 110.2, 78.7, 45.0, 30.2, 21.4; HRMS (ESI) Calcd for C<sub>20</sub>H<sub>22</sub>N<sub>4</sub>O<sub>2</sub>S<sub>2</sub> [M+H]<sup>+</sup> 415.1262, found. 415.1266.

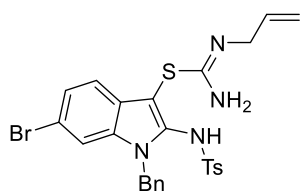

**1-Benzyl-2-[(4-methylbenzene-1-sulfonyl)amino]-6-bromo-1H-indol-3-yl N-allylcarbamimidothioate (3i)**

White solid; Yield: 68%;  $R_f$  = 0.21 (EtOAc/hexane = 3:1); m.p. 158-159 °C; IR (neat):  $\nu_{\max}$  = 3383, 3212, 3060, 2924, 2857, 1644, 1496, 1377, 1225, 1125, 1088 cm<sup>-1</sup>; <sup>1</sup>H NMR (400 MHz, CDCl<sub>3</sub>)  $\delta$  = 10.29 (br s, 1H), 9.94 (br s, 1H), 7.62 (d,  $J$  = 8 Hz, 2H), 7.54 (s, 1H), 7.40-7.30 (m, 2H), 7.18 (d,  $J$  = 7.6 Hz, 3H) 6.61 (d,  $J$  = 6.8 Hz, 2H), 6.38 (br s, 3H), 6.04-5.96 (m, 1H), 5.51-5.41 (m, 2H), 4.86 (s, 2H), 4.49 (br s, 1H), 4.13 (s, 2H), 2.40 (s, 3H); <sup>13</sup>C NMR (100 MHz, CDCl<sub>3</sub>)  $\delta$  = 172.2, 150.0, 143.0, 141.0, 137.2, 133.2, 130.9, 130.4, 129.1, 128.1, 127.4, 126.5,

125.7, 124.7, 119.8, 119.4, 114.9, 111.4, 46.4, 46.1, 41.0, 21.4 ppm; HRMS (ESI) Calcd for  $C_{25}H_{24}^{81}BrN_4O_2S_2$   $[M+H]^+$ ; 571.0674, found 571.0614.

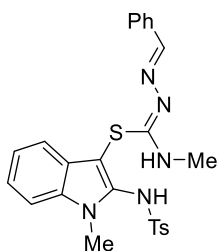

**1-Methyl-2-[(4-methylbenzene-1-sulfonyl)amino]-1H-indol-3-yl(2E)-N-methyl-2-[(phenyl)methylidene]hydrazine-1-carboximidothioate (6a)**

White solid; Yield: 60%;  $R_f = 0.23$  (EtOAc/hexane = 1:3); m.p. 130-131 °C; IR (neat):  $\nu_{max} = 3621, 3225, 3064, 2933, 1690, 1599, 1472, 1338, 1163, 1093, 748$   $cm^{-1}$ ;  $^1H$  NMR (400 MHz,  $CDCl_3$ )  $\delta = 9.80$  (br s, 1H), 7.76 (d= 8 Hz, 2H), 7.62-7.30 (m, 6H), 7.43-7.41 (m, 1H), 7.35-7.24 (m, 5H), 3.95 (s, 3H), 3.69 (s, 3H), 2.48 (s, 3H) 1.80 (br s, 1H);  $^{13}C$  NMR (100 MHz,  $CDCl_3$ )  $\delta = 155.2, 153.2, 143.9, 137.1, 136.9, 134.9, 130.4, 129.5, 129.0, 128.5, 127.0, 126.7, 123.0, 121.1, 118.3, 110.6, 94.2, 32.2, 31.0, 21.7$  ppm; HRMS (ESI) Calcd for  $C_{25}H_{25}N_5O_2S_2$   $[M+H]^+$ ; 492.1483, found 492.1520.

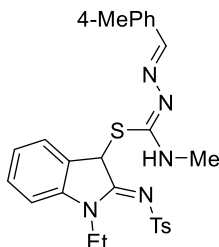

**1-Ethyl-2-[(4-methylbenzene-1-sulfonyl)amino]-1H-indol-3-yl(2E)-N-methyl-2-[(4-methylphenyl)methylidene]hydrazine-1-carboximidothioate (6b)**

White solid; Yield: 64%;  $R_f = 0.32$  (EtOAc/hexane = 1:3); m.p. 149-152 °C; IR (neat):  $\nu_{max} = 3415, 3051, 2927, 1609, 1536, 1477, 1337, 1263, 1162, 1029, 737$   $cm^{-1}$ ;  $^1H$  NMR (400 MHz,  $CDCl_3$ )  $\delta = 8.26$  (s, 1H), 7.58-7.51 (m, 6H), 7.42-7.38(m, 1H), 7.25-7.24 (m, 6H), 4.58 (t,  $J = 4.4$  Hz, 2H), 4.06 (br s, 1H), 2.77 (s, 3H), 2.46 (s, 6H), 1.55 (t,  $J = 6.8$  Hz, 3H);  $^{13}C$  NMR (100 MHz,  $CDCl_3$ )  $\delta 161.9, 151.9, 144.5, 139.6, 135.3, 134.9, 133..1, 129.7, 129.3, 128.1, 127.9, 127.3, 123.8, 121.6, 120.0, 111.1, 94.5, 39.5, 30.5, 21.8, 21.6, 14.7$  ppm; HRMS (ESI) Calcd for  $C_{27}H_{29}N_5O_2S_2$   $[M+H]^+$ ; 520.1840, found 520.1843.

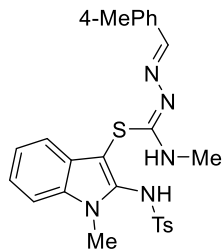

**1-Methyl-2-[(4-methylbenzene-1-sulfonyl)amino]-1H-indol-3-yl(2E)-N-methyl-2-[(4-methylphenyl)methylidene]hydrazine-1-carboximidothioate (6c)**

White solid; Yield: 74%;  $R_f = 0.29$  (EtOAc/hexane = 1:3); m.p. 142-143 °C; IR (neat):  $\nu_{\max} = 3415, 3224, 2924, 1538, 1403, 1338, 1257, 1163, 1094, 1040, 813, 735 \text{ cm}^{-1}$ ;  $^1\text{H NMR}$  (400 MHz,  $\text{CDCl}_3$ )  $\delta = 8.26$  (s, 1H), 7.60-7.51 (m, 7H), 7.48-7.41(m, 2H), 7.30-7.23 (m, 6H), 5.34 (s, 1H), 4.00 (s, 3H), 2.76-2.75 (s, 3H), 2.49 (s, 3H), 2.45 (s, 3H);  $^{13}\text{C NMR}$  (100 MHz,  $\text{CDCl}_3$ )  $\delta = 161.9, 151.8, 144.6, 139.6, 136.1, 135.9, 134.7, 133.0, 129.6, 129.3, 127.9, 127.7, 127.2, 123.8, 121.9, 119.8, 110.6, 93.7, 53.5, 31.4, 30.5, 21.8, 21.6$ ; HRMS (ESI) Calcd for  $\text{C}_{26}\text{H}_{27}\text{N}_5\text{O}_2\text{S}_2$   $[\text{M}+\text{H}]^+$ ; 506.1684, found 506.1690.

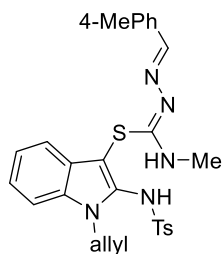

**1-Allyl-2-[(4-methylbenzene-1-sulfonyl)amino]-1H-indol-3-yl(2E)-N-methyl-2-[(4-methylphenyl)methylidene]hydrazine-1-carboximidothioate (6d)**

White solid; Yield: 72%;  $R_f = 0.34$  (EtOAc/hexane = 1:3); m.p. 139-140 °C; IR (neat):  $\nu_{\max} 3415, 3223, 3050, 2926, 1608, 1536, 1476, 1387, 1337, 1162, 1093, 856, 740 \text{ cm}^{-1}$ ;  $^1\text{H NMR}$  (400 MHz,  $\text{CDCl}_3$ )  $\delta = 8.25$  (s, 1H), 7.83 (d,  $J = 8.4 \text{ Hz}$ , 2H), 7.60-7.50 (m, 5H), 7.32-7.24 (m, 6H), 6.14-6.06 (m, 1H), 5.34-5.21 (m, 2H), 5.12-5.11 (m, 2H), 4.05 (br s, 1H), 2.76-2.75 (m, 3H), 2.48-2.44 (m, 6H);  $^{13}\text{C NMR}$  (100 MHz,  $\text{CDCl}_3$ )  $\delta = 161.7, 152.1, 144.6, 143.5, 139.7, 139.2, 135.5, 134.8, 133.4, 133.0, 129.7, 129.6, 129.3, 127.9, 127.3, 126.5, 123.9, 121.8, 119.9, 117.7, 111.7, 94.9, 47.3, 30.5, 21.6, 21.5$ ; HRMS (ESI) Calcd for  $\text{C}_{28}\text{H}_{29}\text{N}_5\text{O}_2\text{S}_2$   $[\text{M}+\text{H}]^+$ ; 532.1840, found 532.1836.



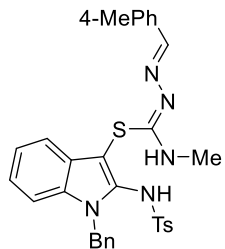

**1-Benzyl-2-[(4-methylbenzene-1-sulfonyl)amino]-1H-indol-3-yl(2E)-N-methyl-2-[(4-methylphenyl)methylidene]hydrazine-1-carboximidothioate (6e)**

White solid; Yield: 68%;  $R_f = 0.31$  (EtOAc/hexane = 3:1); m.p. 142-143 °C; IR (neat):  $\nu_{\max}$  3415, 3051, 2927, 1536, 1337, 1263, 1162, 1093, 954, 814, 737  $\text{cm}^{-1}$ ;  $^1\text{H}$  NMR (400 MHz,  $\text{CDCl}_3$ )  $\delta = 8.30$  (s, 1H), 7.65-7.60 (m, 4H), 7.37-7.27 (m, 11H), 7.15-7.14 (m, 2H), 5.75 (s, 2H), 4.0 (br s, 1H), 3.02 (br s, 1H), 2.75-2.74 (s, 3H), 2.49-2.47 (m, 6H);  $^{13}\text{C}$  NMR (100 MHz,  $\text{CDCl}_3$ )  $\delta = 161.1, 152.4, 144.8, 139.7, 136.8, 135.7, 135.5, 134.8, 133.0, 129.3, 128.8, 128.0, 127.9, 127.7, 127.4, 126.8, 124.2, 121.9, 119.9, 111.7, 95.7, 48.0, 30.5, 21.9, 21.6$ ; HRMS (ESI) Calcd for  $\text{C}_{32}\text{H}_{31}\text{N}_5\text{O}_2\text{S}_2$   $[\text{M}+\text{H}]^+$ ; 582.1997, found 582.1992.

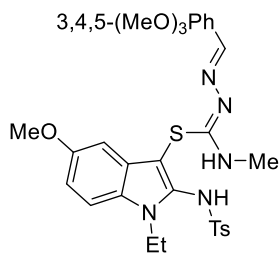

**1-Ethyl-2-[(4-methylbenzene-1-sulfonyl)amino]-5-methoxy-1H-indol-3-yl(2E)-N-methyl-2-[(3,4,5-trimethoxyphenyl)methylidene]hydrazine-1-carboximidothioate (6f)**

White solid; Yield: 76%;  $R_f = 0.32$  (EtOAc/hexane = 3:1); m.p. 158-159 °C; IR (neat):  $\nu_{\max}$  3411, 3055, 2927, 1606, 1566, 1530, 1455, 1402, 1262, 1161, 1087, 733  $\text{cm}^{-1}$ ;  $^1\text{H}$  NMR (400 MHz,  $\text{CDCl}_3$ )  $\delta = 8.22$  (s, 1H), 7.68 (d,  $J = 7.6$  Hz, 2H), 7.38-7.36 (m, 1H), 7.20-7.18 (m, 4H), 7.01-7.00 (m, 4H), 4.46-4.45 (m, 2H), 4.11 (br s, 1H), 3.95-3.93 (9H), 3.84 (s, 3H), 3.01 (s, 1H), 2.74 (s, 3H), 2.35 (s, 3H), 1.48 (t, 6.8 Hz, 3H);  $^{13}\text{C}$  NMR (100 MHz,  $\text{CDCl}_3$ )  $\delta = 161.4, 155.7, 153.4, 151.6, 144.5, 139.6, 135.7, 135.1, 131.4, 129.6, 128.9, 127.6, 114.6, 112.0, 104.6, 100.7, 93.6, 61.0, 56.3, 55.9, 39.5, 30.4, 21.7, 14.8$  ppm; HRMS (ESI) Calcd for  $\text{C}_{30}\text{H}_{35}\text{N}_5\text{O}_6\text{S}_2$   $[\text{M}+\text{H}]^+$ ; 626.2107, found: 626.2110.

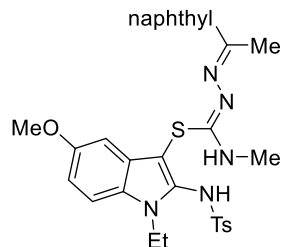

**1-Ethyl-2-[(4-methylbenzene-1-sulfonyl)amino]-5-methoxy-1H-indol-3-yl(2E)-N-methyl-2-(1-(naphthalenyl)methylidene)hydrazine-1-carboximidothioate (6g)**

White solid; Yield: 79%;  $R_f = 0.32$  (EtOAc/hexane = 1:3); m.p. 163-164 °C; ; IR (neat):  $\nu_{\max}$  3417, 3214, 3055, 2982, 2938, 1731, 1539, 1484, 1378, 1241, 1161, 1089, 1037, 733  $\text{cm}^{-1}$ .  $^1\text{H}$  NMR (400 MHz,  $\text{CDCl}_3$ )  $\delta = 7.86$  (d,  $J = 6.8$  Hz, 2H), 7.59 (d,  $J = 8$  Hz, 1H), 7.48-7.40 (m, 7H), 7.23-7.20 (m, 2H), 7.04-7.00 (br s, 1H), 4.53 (q,  $J = 7.2$  Hz, 2H), 4.02-4.01 (m, 1H), 3.84 (s, 3H), 3.00 (s, 1H), 2.80-2.78 (m, 3H), 2.48-2.41 (m, 6H), 1.53 (t,  $J = 7.2$  Hz, 3H);  $^{13}\text{C}$  NMR (100 MHz,  $\text{CDCl}_3$ )  $\delta = 160.4, 156.4, 155.6, 144.5, 139.5, 135.0, 134.7, 129.6, 128.8, 128.7, 128.2, 127.9, 126.2, 114.6, 112.1, 100.7, 94.1, 55.9, 39.5, 30.5, 21.8, 14.8, 14.0$  ppm. HRMS (ESI) Calcd for  $\text{C}_{32}\text{H}_{33}\text{N}_5\text{O}_3\text{S}_2$   $[\text{M}+\text{H}]^+$ ; 601.2103, found 601.2098.

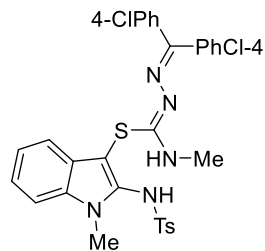

**1-Methyl-2-[(4-methylbenzene-1-sulfonyl)amino]-1H-indol-3-yl-N-methyl-2-[(di-*p*-chlorophenyl)methylidene]hydrazine-1-carboximidothioate (6h)**

White solid; Yield: 57%;  $R_f = 0.29$  (EtOAc/hexane = 1:3); m.p. 161-162 °C; IR (neat):  $\nu_{\max}$  3417, 3214, 3055, 2982, 2938, 1731, 1539, 1484, 1378, 1241, 1161, 1089, 1037, 733  $\text{cm}^{-1}$ ;  $^1\text{H}$  NMR (400 MHz,  $\text{CDCl}_3$ )  $\delta = 7.61 - 7.56$  (m, 6H), 7.49-7.47 (m, 2H), 7.40 (m, 7H), 7.30-7.22 (m, 6H), 7.00 (br s, 1H), 4.05-4.00 (m, 4H), 3.70 (br s, 1H), 3.04 (br s, 1H), 2.54-2.40 (m, 6H);  $^{13}\text{C}$  NMR (100 MHz,  $\text{CDCl}_3$ )  $\delta = 164.2, 151.6, 144.6, 141.3, 136.7, 135.4, 135.2, 129.7, 127.7, 127.2, 124.6, 124.4, 123.5, 121.4, 119.2, 118.8, 110.6, 110.1, 91.5, 34.0, 31.0, 21.6$ ; HRMS (ESI) Calcd for  $\text{C}_{31}\text{H}_{27}\text{Cl}_2\text{N}_5\text{O}_2\text{S}_2$   $[\text{M}+\text{H}]^+$ ; 636.1061, found 636.1060.

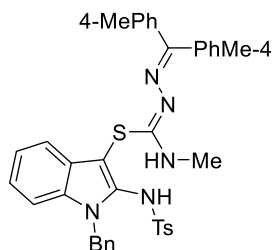

**1-Benzyl-2-[(4-methylbenzene-1-sulfonyl)amino]-1H-indol-3-yl-N-phenyl-2-[(di-*p*-tolyl)methylidene]hydrazine-1-carboximidothioate (6i)**

White solid; Yield: 46%;  $R_f = 0.31$  (EtOAc/hexane = 1:3); m.p. 159-160 °C; IR (neat):  $\nu_{\max}$  3417, 3214, 3055, 2982, 2938, 1731, 1539, 1484, 1378, 1241, 1161, 1089, 1037, 733  $\text{cm}^{-1}$ ;  $^1\text{H}$  NMR (400 MHz,  $\text{CDCl}_3$ )  $\delta = 7.65$  -7.63 (m, 6H), 7.44- 7.22 (m, 14H), 7.12 (m, 4H), 6.99-6.82 (m, 4H), 5.83 (s, 2H), 2.51- 2.48 (m, 6H), 2.23 (s, 3H);  $^{13}\text{C}$  NMR (100 MHz,  $\text{CDCl}_3$ )  $\delta = 161.1$ , 154.4, 145.0, 139.6, 138.0, 136.9, 136.0, 129.8, 129.6, 128.9, 128.8, 128.9, 127.9, 127.8, 126.7, 124.4, 122.2, 119.9, 118.2, 111.7, 95.4, 48.0, 25.3, 21.7, 21.5; HRMS (ESI) Calcd for  $\text{C}_{44}\text{H}_{39}\text{N}_5\text{O}_2\text{S}_2$   $[\text{M}+\text{H}]^+$ ; 734.2623, found 734.2624.

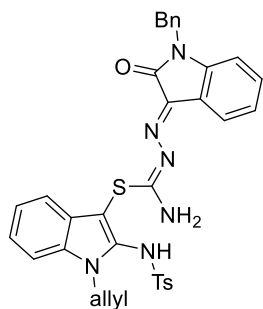

**1-Allyl-2-[(4-methylbenzene-1-sulfonyl)amino]-1H-indol-3-yl(2E)-2[(1-benzyl-2-oxoindolin-3-ylidene)]hydrazine-1-carboximidothioate (6j)**

Orange solid; Yield: 44%;  $R_f = 0.34$  (EtOAc/hexane = 3:1); m.p. 133-134 °C; IR (neat):  $\nu_{\max}$  3265, 3131, 2924, 2855, 1696, 1608, 1535, 1467, 1358, 1262, 1138, 1086, 358  $\text{cm}^{-1}$ ;  $^1\text{H}$  NMR (400 MHz,  $\text{CDCl}_3$ )  $\delta = 7.98$  -7.92 (m, 3H), 7.68 (d,  $J = 7.2$  Hz, 1H), 7.41-7.33 (m, 7H), 7.30-7.22 (m, 5H), 7.19-7.15 (br s, 1H), 7.18 (s, 1H), 6.86 (d,  $J = 7.6$  Hz, 1H), 6.06-5.99 (m, 1H), 5.26-5.20 (m, 2H), 5.08-5.06 (m, 4H), 2.43 (s, 3H), 1.88 (br s, 1H);  $^{13}\text{C}$  NMR (100 MHz,  $\text{CDCl}_3$ )  $\delta = 161.4$ , 154.6, 142.9, 141.3, 136.4, 134.6, 134.6, 133.0, 132.1, 129.2, 129.1, 128.2, 127.4, 125.9, 123.7, 123.0, 122.8, 121.4, 119.1, 117.4, 117.3, 111.2, 110.5, 47.6, 43.8, 21.4; HRMS (ESI) Calcd for  $\text{C}_{34}\text{H}_{30}\text{N}_6\text{O}_3\text{S}_2$   $[\text{M}+\text{H}]^+$ ; 636.1932, found 636.1060.

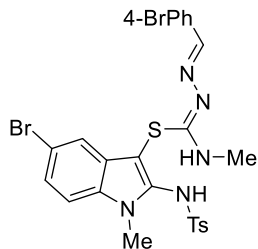

**1-Ethyl-2-[(4-methylbenzene-1-sulfonyl)amino]-5-bromo-1H-indol-3-yl(2E)-N-methyl-2-[(4-bromophenyl)methylidene]hydrazine-1-carboximidothioate (6k)**

White solid; Yield: 80%; yield.  $R_f = 0.31$  (EtOAc/hexane = 3:1); m.p. 162-164 °C; IR (neat):  $\nu_{\max}$  3415, 3224, 2924, 1538, 1403, 1338, 1257, 1163, 1094, 1040, 813, 735  $\text{cm}^{-1}$ ;  $^1\text{H}$  NMR (400 MHz,  $\text{CDCl}_3$ )  $\delta = 8.24$  (s, 1H), 7.72 (d,  $J = 1.2\text{Hz}$ , 1H), 7.60–7.58 (m, 5H), 7.49-7.47 (m, 1H), 7.41-7.38 (m, 1H), 7.30-7.25 (m, 3H), 4.54 (q,  $J = 7.2\text{Hz}$ , 1H), 4.00 (br s, 1H), 2.77 (d,  $J = 4.4\text{Hz}$ , 3H), 2.48 (s, 3H), 1.53 (t,  $J = 7.2\text{Hz}$ , 3H);  $^{13}\text{C}$  NMR (100 MHz,  $\text{CDCl}_3$ )  $\delta = 161.9$ , 152.0, 144.6, 139.6, 135.3, 134.9, 133.1, 129.7, 129.2, 128.1, 127.9, 127.3, 123.8, 121.6, 120.0, 111.1, 39.5, 30.5, 21.6, 14.7; HRMS (ESI) Calcd for  $\text{C}_{26}\text{H}_{25}^{81}\text{BrN}_5\text{O}_2\text{S}_2$   $[\text{M}+\text{H}]^+$ ; 663.9874, found 663.9871.

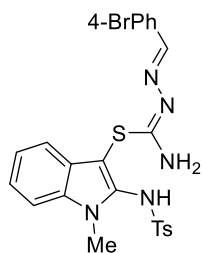

**1-Methyl-2-[(4-methylbenzene-1-sulfonyl)amino]-1H-indol-3-yl(2E)-2-[(4-bromophenyl)methylidene]hydrazine-1-carboximidothioate (6l)**

White solid; Yield: 74%;  $R_f = 0.31$  (EtOAc/hexane = 1:4); m.p. 160-161 °C; IR (neat):  $\nu_{\max}$  3224, 3053, 2942, 2805, 1534, 1487, 1385, 1335, 1234, 1159, 1092, 738  $\text{cm}^{-1}$ ;  $^1\text{H}$  NMR (400 MHz,  $\text{CDCl}_3$ )  $\delta = 8.16$  (s, 1H), 7.59-7.57 (m, 5H), 7.48-7.44 (m, 1H), 7.38-7.16 (m, 8H), 6.92 (s, 1H), 4.02 (s, 3H), 2.37 (s, 3H);  $^{13}\text{C}$  NMR (100 MHz,  $\text{CDCl}_3$ )  $\delta = 164.2$ , 151.6, 144.6, 141.3, 135.7, 135.4, 135.2, 129.7, 127.6, 127.2, 124.6, 124.4, 123.5, 121.4, 119.2, 118.8, 110.6, 110.1, 91.5, 31.0, 21.6; HRMS (ESI) Calcd for  $\text{C}_{24}\text{H}_{22}^{81}\text{BrN}_5\text{O}_2\text{S}_2$   $[\text{M}+\text{H}]^+$ ; 558.0456, found 558.0490.

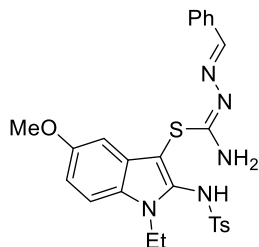

**1-Ethyl-2-[(4-methylbenzene-1-sulfonyl)amino]-5-methoxy-1*H*-indol-3-yl(2*E*)-2-[(phenyl)methylidene]hydrazine-1-carboximidothioate (6m)**

White solid; Yield: 76%;  $R_f = 0.39$  (EtOAc/hexane = 3:1); m.p. 133-134 °C; IR (neat):  $\nu_{\max}$  3411, 3055, 2927, 1606, 1566, 1530, 1455, 1402, 1262, 1161, 1087, 733  $\text{cm}^{-1}$ ;  $^1\text{H}$  NMR (400 MHz,  $\text{CDCl}_3$ )  $\delta = 7.96$ -7.93 (m, 3H), 7.68 (d,  $J = 7.2$  Hz, 2H), 7.48—7.46 (m, 4H), 7.14 (d,  $J = 8$  Hz, 3H), 7.90-6.52 (m, 3H), 6.52 (s, 1H), 3.77 (s, 3H), 3.10 (q,  $J = 7.2$  Hz, 2H) 2.40 (s, 3H), 1.30 (t, 6.8 Hz, 3H);  $^{13}\text{C}$  NMR (100 MHz,  $\text{CDCl}_3$ )  $\delta = 166.0$ , 153.6, 143.3, 142.7, 138.1, 136.9, 133.2, 130.4, 129.1, 128.9, 128.4, 127.6, 126.1, 120.4, 119.6, 117.1, 115.3, 97.07, 55.5, 40.4, 30.4, 21.5, 14.9 ppm; HRMS (ESI) Calcd for  $\text{C}_{26}\text{H}_{27}\text{N}_5\text{O}_3\text{S}_2$   $[\text{M}+\text{H}]^+$ ; 523.1588, found 523.1583.

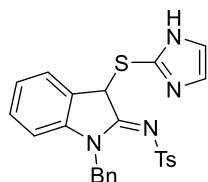

**N-{1-Benzyl-3-[(1*H*-imidazol-2-yl)sulfanyl]-1*H*-indol-2-yl}-4-methylbenzenesulfonamide (8a)**

White solid; Yield: 87%;  $R_f = 0.32$  (EtOAc/hexane = 1:4); m.p. 162-163 °C; IR (neat):  $\nu_{\max}$  3354, 3066, 2928, 1735, 1610, 1496, 1332, 1240, 1159, 1017  $\text{cm}^{-1}$ ;  $^1\text{H}$  NMR (400 MHz,  $\text{CDCl}_3$ )  $\delta = 7.71$ -7.64 (m, 3H), 7.30-7.22 (m, 5H), 7.21-7.12 (m, 3H), 7.05-7.03 (m, 2H), 6.90 (s, 2H) 5.64 (s, 2H), 5.32 (s, 1H), 4.95 (br s, 1H), 2.43 (s, 3H);  $^{13}\text{C}$  NMR (100 MHz,  $\text{CDCl}_3$ )  $\delta = 148.7$ , 144.9, 142.1, 141.0, 139.9, 139.3, 134.3, 133.3, 132.4, 132.0, 131.4, 128.0, 125.7, 124.4, 115.8, 103.6, 51.9, 26.4 ppm; HRMS (ESI) Calcd for  $\text{C}_{25}\text{H}_{22}\text{N}_4\text{O}_2\text{S}_2$   $[\text{M}+\text{H}]^+$ ; 475.1264, found 475.1259.

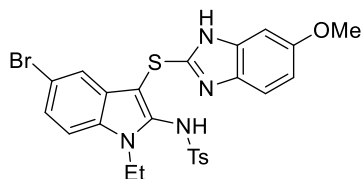

**N-{1-Ethyl-3-[(5-methoxy-1*H*-benzo[*d*]imidazol-2-yl)sulfanyl]-5-bromo-1*H*-indol-2-yl}-4-methylbenzenesulfonamide (8b)**

White solid; Yield: 88%;  $R_f = 0.31$  (EtOAc/hexane = 1:4); m.p. 166-167 °C; IR (neat):  $\nu_{\max}$  3063, 2930, 1601, 1443, 1391, 1334, 1158, 1119  $\text{cm}^{-1}$ ;  $^1\text{H}$  NMR (400 MHz,  $\text{CDCl}_3$ )  $\delta = 7.62$  (d,  $J = 8.4$  Hz, 2H), 7.54 (s, 1H), 7.45-7.42 (m, 1H), 7.31-7.30 (m, 3H), 7.21 (dd,  $J_1 = 8.4$  Hz,  $J_2 = 1.2$  Hz, 1H), 7.16-7.14 (m, 2H), 6.87 (s, 1H), 6.79 (dd,  $J_1 = 8.8$  Hz,  $J_2 = 2.4$  Hz, 1H), 4.41 (q,  $J = 7.2$  Hz, 2H), 3.79 (s, 3H), 2.33 (s, 3H), 1.46 (t,  $J = 7.2$  Hz, 3H);  $^{13}\text{C}$  NMR (100 MHz,  $\text{CDCl}_3$ )  $\delta = 156.3$ , 150.2, 144.2, 136.5, 135.9, 134.5, 129.5, 127.7, 127.6, 127.5, 123.4, 121.4, 119.2, 114.8, 111.9, 110.9, 97.0, 93.8, 55.8, 39.1, 21.4, 14.7 ppm; HRMS (ESI) Calcd for  $\text{C}_{25}\text{H}_{23}^{81}\text{BrN}_4\text{O}_3\text{S}_2$   $[\text{M}+\text{H}]^+$ ; 573.0452, found 573.0456.

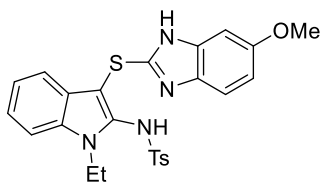

**N-(1-Ethyl-3-[(5-methoxy-1H-benzo[d]imidazol-2-yl)sulfanyl]-1H-indol-2-yl)-4-methylbenzenesulfonamide (8c)**

White solid; Yield: 81%;  $R_f = 0.31$  (EtOAc/hexane = 1:4); m.p. 153-154 °C; IR (neat):  $\nu_{\max}$  3608, 3055, 2933, 2841, 1624, 1528, 1453, 1394, 1337, 1203, 1157, 744  $\text{cm}^{-1}$ ;  $^1\text{H}$  NMR (400 MHz,  $\text{CDCl}_3$ )  $\delta = 7.71$  (d,  $J = 8$  Hz, 2H), 7.49-7.42 (m, 2H), 7.35-7.30 (m, 2H), 7.25-7.22 (m, 1H), 7.49-7.08 (m, 6H), 6.77-6.76 (m, 2H), 4.51 (q,  $J = 7.8$  Hz, 2H), 3.78 (s, 3H), 2.22 (s, 3H), 1.49 (t,  $J = 7.2$  Hz, 3H);  $^{13}\text{C}$  NMR (100 MHz,  $\text{CDCl}_3$ )  $\delta = 156.3$ , 150.2, 144.2, 136.5, 135.9, 134.5, 129.5, 127.8, 127.6, 127.5, 123.4, 121.4, 119.2, 114.8, 111.9, 110.9, 97.0, 93.7, 55.8, 39.1, 21.4, 14.7 ppm; HRMS (ESI) Calcd for  $\text{C}_{25}\text{H}_{24}\text{N}_4\text{O}_3\text{S}_2$   $[\text{M}+\text{H}]^+$ ; 493.1368, found: 493.1364.

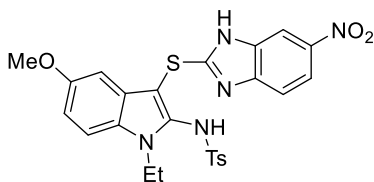

**N-(1-Ethyl-3-[(5-nitro-1H-benzo[d]imidazol-2-yl)sulfanyl]-5-methoxy-1H-indol-2-yl)-4-methylbenzenesulfonamide (8d)**

White solid; Yield: 77%  $R_f = 0.23$  (EtOAc/hexane = 1:4); m.p. 179-181 °C; IR (neat):  $\nu_{\max}$  3592, 3231, 2927, 2850, 1521, 1482, 1416, 1334, 1218, 1162, 813  $\text{cm}^{-1}$ ;  $^1\text{H}$  NMR (400 MHz,  $\text{CDCl}_3$ )  $\delta = 8.31$  (s, 1H), 8.09 (dd,  $J_1 = 8.8$  Hz,  $J_2 = 2$  Hz, 2H), 7.64 (d,  $J = 8$  Hz, 2H), 7.42 (s, 1H), 7.38-7.35 (m, 1H), 7.30 (s, 1H), 7.13 (d,  $J = 8.4$  Hz, 2H), 6.99-6.97 (m, 2H), 4.44 (q,  $J = 7.2$  Hz, 2H), 3.77 (s, 3H), 2.28 (s, 3H), 2.03 (br s, 1H), 1.50 (t,  $J = 7.2$  Hz, 3H);  $^{13}\text{C}$  NMR (100 MHz,  $\text{CDCl}_3$ )

$\delta = 155.4, 144.1, 136.2, 135.2, 129.4, 129.4, 128.4, 127.4, 117.9, 114.0, 111.8, 100.5, 55.8, 39.1, 21.4, 14.8$  ppm; HRMS (ESI) Calcd for  $C_{25}H_{23}N_5O_5S_2$   $[M+H]^+$ ; 538.1218, found 538.1218.

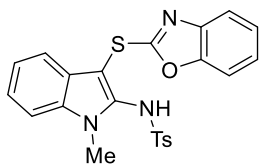

**N-(1-Methyl-3-[(1H-benzo[d]oxazol-2-yl)sulfanyl]-1H-indol-2-yl)-4-methylbenzenesulfonamide (8e)**

Red solid; Yield: 94%;  $R_f = 0.33$  (EtOAc/hexane = 1:4); m.p. 148-149 °C; IR (neat):  $\nu_{max}$  3224, 3053, 2942, 2805, 1534, 1487, 1385, 1335, 1234, 1159, 1092, 738  $cm^{-1}$ ;  $^1H$  NMR (400 MHz,  $CDCl_3$ )  $\delta = 8.16$  (s, 1H), 7.59-7.55 (m, 4H), 7.47-7.45 (m, 1H), 7.39-7.35 (m, 2H), 7.31-7.22 (m, 3H), 7.18-7.16 (m, 2H), 4.02 (s, 3H), 2.37 (s, 3H);  $^{13}C$  NMR (100 MHz,  $CDCl_3$ )  $\delta = 164.2, 151.6, 144.6, 141.3, 135.7, 135.4, 135.2, 129.7, 127.7, 127.2, 124.6, 124.4, 123.5, 121.4, 119.2, 118.7, 110.6, 110.1, 91.5, 31.0, 21.6$ ; HRMS (ESI) Calcd for  $C_{23}H_{19}N_3O_3S_2$   $[M+H]^+$ ; 450.0946, found 450.0942.

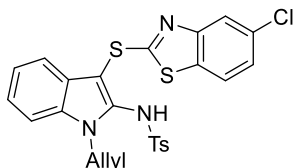

**N-(1-Allyl-3-[(5-chloro-1H-benzo[d]thiazol-2-yl)sulfanyl]-1H-indol-2-yl)-4-methylbenzenesulfonamide (8f)**

White solid; Yield: 89%;  $R_f = 0.34$  (EtOAc/hexane = 1:4); m.p. 161-163 °C; IR (neat):  $\nu_{max}$  3063, 2927, 2848, 1592, 1530, 1418, 1332, 1160, 1079, 737  $cm^{-1}$ ;  $^1H$  NMR (400 MHz,  $CDCl_3$ )  $\delta = 8.19$  (s, 1H), 7.71-7.66 (m, 3H), 7.54 (dd,  $J_1 = 20.4$  Hz,  $J_2 = 8$  Hz, 2H), 7.40-7.36 (m, 1H), 7.30-7.22 (m, 5H), 7.14 (dd,  $J_1 = 8.4$  Hz,  $J_2 = 1.6$  Hz, 1H), 6.15-6.06 (m, 1H), 5.33 (d,  $J = 10.4$  Hz, 1H), 5.18-5.11 (m, 3H), 2.38 (s, 3H);  $^{13}C$  NMR (100 MHz,  $CDCl_3$ )  $\delta = 174.6, 154.6, 144.9, 135.5, 135.3, 135.0, 133.2, 132.9, 132.1, 129.8, 127.9, 126.8, 124.9, 124.4, 124.0, 122.1, 121.9, 121.4, 121.1, 119.5, 117.4, 111.7, 95.8, 46.9, 21.7$  ppm; HRMS (ESI) Calcd for  $C_{25}H_{20}ClN_3O_2S_3$   $[M+H]^+$ ; 528.0454, found 528.1229.

## 6. General procedure for the alkylation and acylation of carbimimidothioates 14a-c

To an oven-dried RB flask, a solution containing equimolar amount of the appropriate carbamimidothioate **3/8** and alkyl halide was stirred in DCM for 5 min to obtain a homogeneous

mixture, then a drop of DBU was added and allowed to stir at room temperature until the disappearance of the starting material (monitored using TLC). Similar procedure was followed for acylation in the presence of NaOH instead of DBU. After the completion of reaction, the solvent was removed under reduced pressure and diluted with ethyl acetate (10 mL) and water (15 mL). The organic phase was separated and the aqueous layer washed with ethyl acetate (10 mL). Concentration of combined organic layers under reduced pressure afforded the crude product, which was purified by column chromatography using silica gel (100-200 mesh, EtOAc/hexane 30:70) to furnish the corresponding carbamimidothioates **14a-c**.

## 7. Spectral data for products 14a-c

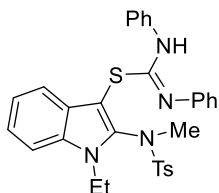

### 1-Ethyl-2-[(4-methylbenzene-1-sulfonyl)methylamino]-1H-indol-3-yl *N,N'*-diphenylcarbamimidothioate (**14a**)

White solid; Yield: 58%;  $R_f = 0.71$  (EtOAc/hexane = 1:3); m.p. 154-155 °C; IR (neat):  $\nu_{\max}$  3063, 2930, 1601, 1443, 1391, 1334, 1158, 1119  $\text{cm}^{-1}$ ;  $^1\text{H}$  NMR (400 MHz,  $\text{CDCl}_3$ )  $\delta = 7.62$ -7.55 (m, 3H), 7.50-7.42 (m, 3H), 7.31-7.30 (m, 4H), 7.22-7.20 (m, 2H), 7.14-7.10 (m, 5H), 6.91 (s, 1H), 6.80 (s, 1H), 4.41 (q,  $J = 7.2$  Hz, 2H), 3.79 (s, 3H), 2.33 (s, 3H), 1.46 (t,  $J = 7.2$  Hz, 3H);  $^{13}\text{C}$  NMR (100 MHz,  $\text{CDCl}_3$ )  $\delta = 163.0$ , 151.7, 144.4, 142.0, 137.5, 135.6, 135.2, 129.8, 127.8, 127.7, 124.4, 124.0, 123.9, 121.5, 119.7, 118.9, 110.7, 92.8, 47.4, 30.5, 21.7, 14.5 ppm; HRMS (ESI) Calcd for  $\text{C}_{31}\text{H}_{30}\text{N}_4\text{O}_2\text{S}_2$   $[\text{M}+\text{H}]^+$ ; 555.1888 found, 555.1886.

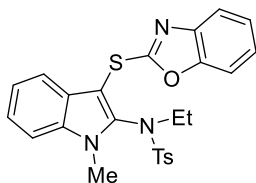

### *N*-{1-Methyl-3-[(1H-benzo[d]oxazol-2-yl)sulfanyl]-1H-indol-2-yl}-*N*-ethyl-4-methylbenzenesulfonamide (**14b**)

White solid; Yield: 64%;  $R_f = 0.77$  (EtOAc/hexane = 1:3); m.p. 119-120 °C; IR (neat):  $\nu_{\max} = 2978$ , 2937, 1980, 1775, 1619, 1570, 1494, 1364, 1247, 1130, 1123, 852, 634  $\text{cm}^{-1}$ ;  $^1\text{H}$  NMR (400 MHz,  $\text{CDCl}_3$ )  $\delta = 7.58$  (d,  $J = 7.2$  Hz, 1H), 7.51-7.45 (m, 3H), 7.40-7.35 (m, 1H), 7.30-7.27 (m, 1H), 7.22-7.15 (m, 6H), 4.16-4.07 (m, 1H), 3.92 (s, 3H), 3.69-3.60 (m, 1H), 2.38 (s, 3H),



1.20 (t,  $J = 7.2$  Hz, 3H);  $^{13}\text{C}$  NMR (100 MHz,  $\text{CDCl}_3$ )  $\delta = 163.0, 151.7, 144.4, 142.0, 137.5, 135.6, 135.2, 129.8, 127.8, 127.7, 124.4, 124.0, 123.9, 121.5, 119.7, 118.9, 110.7, 92.8, 47.4, 30.5, 21.7, 14.5$  ppm; HRMS (ESI) Calcd for  $\text{C}_{25}\text{H}_{23}\text{N}_3\text{O}_3\text{S}_2$   $[\text{M}+\text{H}]^+$ ; 478.1259 found, 478.1259.

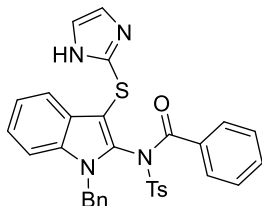

**N-{1-Benzyl-3-[(1H-imidazol-2-yl)sulfanyl]-1H-indol-2-yl}-N-benzenecarbonyl-4-methylbenzenesulfonamide (14c)**

White solid; Yield: 70%;  $R_f = 0.38$  (EtOAc/hexane = 1:3); m.p. 159-161 °C; IR (neat):  $\nu_{\text{max}} = 3249, 3204, 2975, 2927, 1788, 1619, 1570, 1494, 1365, 1217, 1120, 1093$   $\text{cm}^{-1}$ ;  $^1\text{H}$  NMR (400 MHz,  $\text{CDCl}_3$ )  $\delta = 7.98\text{-}7.90$  (m, 2H), 7.88-7.86 (m, 2H), 7.63 (s, 1H), 7.54-7.46 (m, 6H), 7.33-7.24 (m, 6H), 7.09-7.07 (m, 1H), 6.86-6.78 (m, 2H), 4.34 (s, 2H), 4.20 (br s, 1H), 2.45 (s, 3H);  $^{13}\text{C}$  NMR (100 MHz,  $\text{CDCl}_3$ )  $\delta = 174.2, 154.6, 145.0, 135.4, 135.3, 135.0, 133.3, 133.1, 132.1, 129.8, 127.9, 126.9, 124.5, 124.0, 122.1, 121.9, 121.4, 121.2, 119.5, 117.4, 111.7, 95.8, 47.1, 21.6, 14.7$  ppm; HRMS (ESI) Calcd for  $\text{C}_{32}\text{H}_{26}\text{N}_4\text{O}_3\text{S}_2$   $[\text{M}+\text{H}]^+$ ; 579.1524 found, 579.1523.

#### 4. Crystal data for product 6c

**Crystal Data for 6c:** (CCDC 2180196)  $\text{C}_{26}\text{H}_{27}\text{N}_5\text{O}_2\text{S}_2$ ,  $M = 505.65$ , 0.212 x 0.143 x 0.115 mm, Triclinic, space group P -1 with  $a = 11.3439(9)$  Å,  $b = 11.8482(9)$  Å,  $c = 12.3204(9)$  Å,  $\alpha = 97.380(3)$ ,  $\beta = 112.378(2)$ ,  $\gamma = 103.183(3)$ ,  $V = 1447.62(19)$  Å<sup>3</sup>,  $T = 302.(2)$  K,  $R_I = 0.0385$ ,  $wR_2 = 0.1064$  on observed data,  $z = 2$ ,  $D_{\text{calcd}} = 1.236$   $\text{mg cm}^{-3}$ ,  $F(000) = 566$ , Absorption coefficient =  $1.955$   $\text{mm}^{-1}$ ,  $\lambda = 0.71073$  Å, 7266 reflections were collected on a smart apex CCD single crystal diffractometer 9932 observed reflections ( $I > 2\sigma(I)$ ). The largest difference peak and hole = 1.914 and -0.485  $\text{e}\text{\AA}^{-3}$ , respectively. The structure was solved by direct methods and refined by full-matrix least squares on  $F^2$  using SHELXL-2014 software.

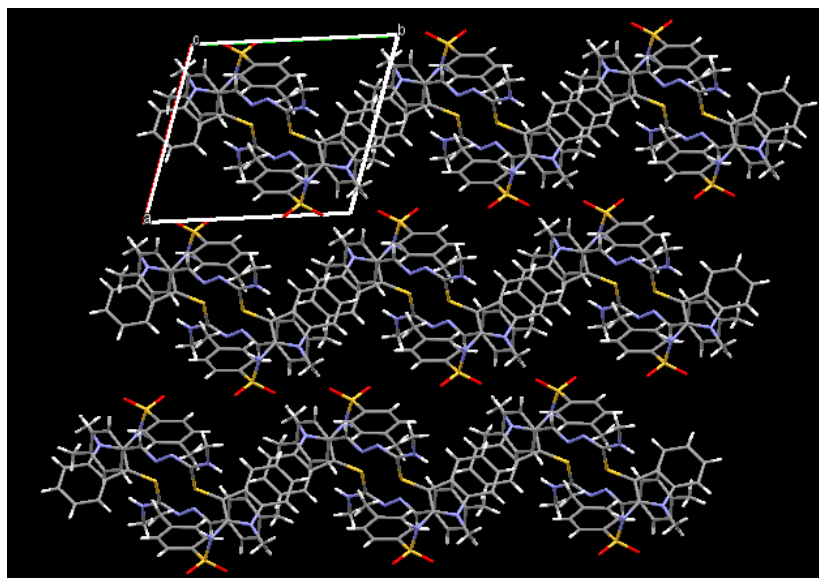

**Figure 1.** Partial crystal packing view of compound **6c** through *b*-axis

There is a C–H··· $\pi$  interaction that is described as given below:

C(20)-H(20)---Cg(1); H(20)---Cg(1) = 2.875 Å and  $\angle$  C(20)-H(20)---Cg(1); H(20)---Cg(1) = 155.65°

The molecules are arranged in three-dimensional network with the presence of a C–H··· $\pi$  interaction. The C–H··· $\pi$  interaction is shown below Figure 2

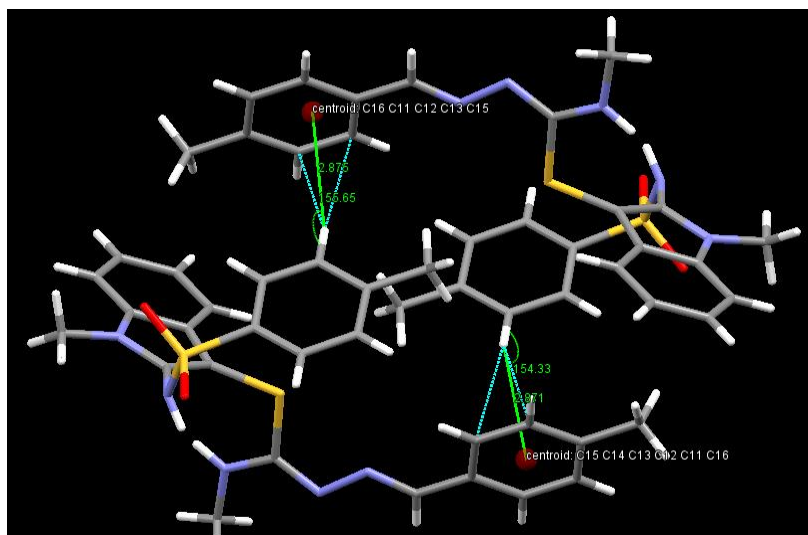

**Figure 2.** A partial packing view of **6c** showing C-H- $\pi$  interactions in solid state arrangement

## 5. HPLC chromatogram for product 6m

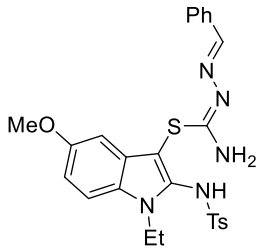

### Area % Report

Data File: D:\Ezchrom\hplc data\RFM-242\_100ACN\_0.6ML2019\_abs\_100ACN.met.rslt\369.dat  
 Method: D:\Ezchrom\Method\2019\_abs\_100ACN.met  
 Acquired: 08-Dec-21 1:51:22 PM (GMT +05:30)  
 Printed: 25-May-22 3:57:11 PM (GMT +05:30)

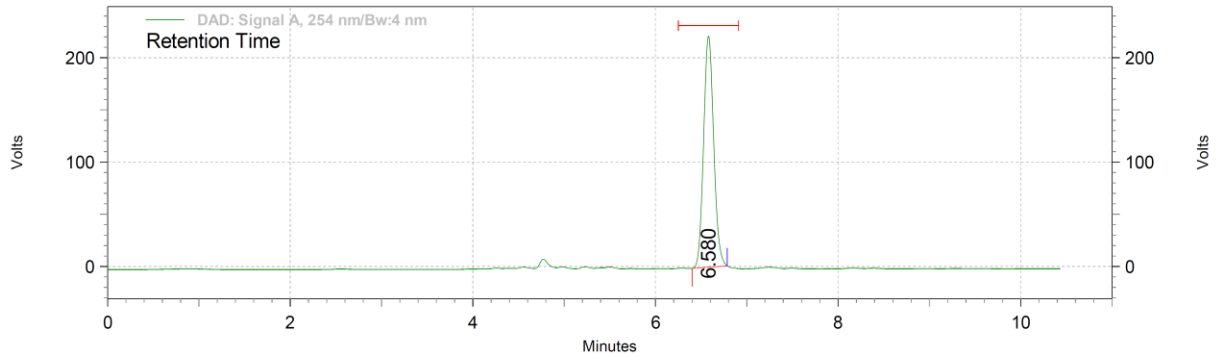

**DAD: Signal  
 A, 254  
 nm/Bw:4 nm  
 Results**

| Retention Time | Area    | Area % | Height | Height % | Name           |
|----------------|---------|--------|--------|----------|----------------|
| 6.580          | 3562869 | 100.00 | 465039 | 100.00   | <b>RFM-242</b> |

|        |         |        |        |        |  |
|--------|---------|--------|--------|--------|--|
| Totals | 3562869 | 100.00 | 465039 | 100.00 |  |
|--------|---------|--------|--------|--------|--|

=====

**BF<sub>3</sub>·OEt<sub>2</sub> Catalyzed S-H insertion reactions of  
α-diazo imidamides and enolizable thioamides under metal-free conditions**

**Supporting Information**

**Copies of <sup>1</sup>H and <sup>13</sup>C NMR spectra**

1. Spectral data for 3-carbamimidothioates **3a-i** S2
2. Spectral data for carbamimidothioates **6a-m** S24
3. Spectral data for carbamimidothioates **8a-f** S50
4. Spectral data for alkylated and acylated carbamimidothioates **14a-dc** S62

**1-Methyl-2-[(4-methylbenzene-1-sulfonyl)amino]-1*H*-indol-3-yl *N,N'*-diethylcarbamimidothioate (3a)**

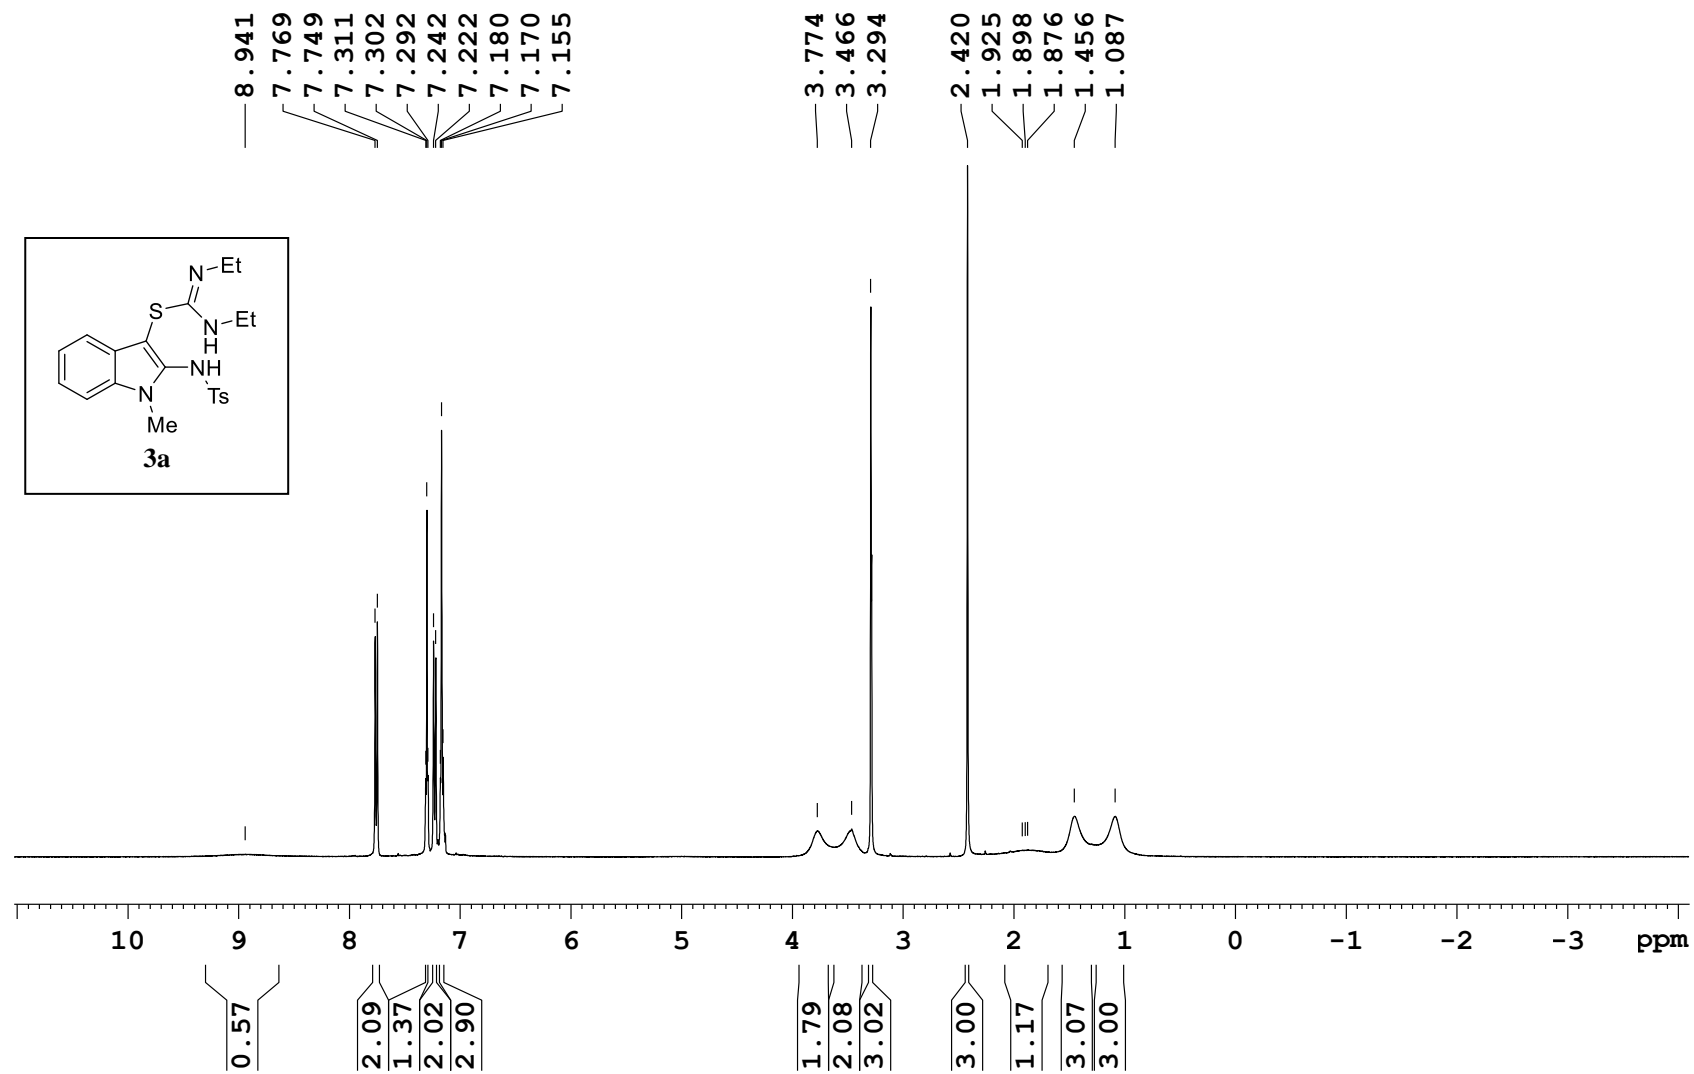

<sup>1</sup>H NMR Spectrum of **3a**

1-Methyl-2-[(4-methylbenzene-1-sulfonyl)amino]-1*H*-indol-3-yl *N,N'*-diethylcarbamimidothioate (**3a**)

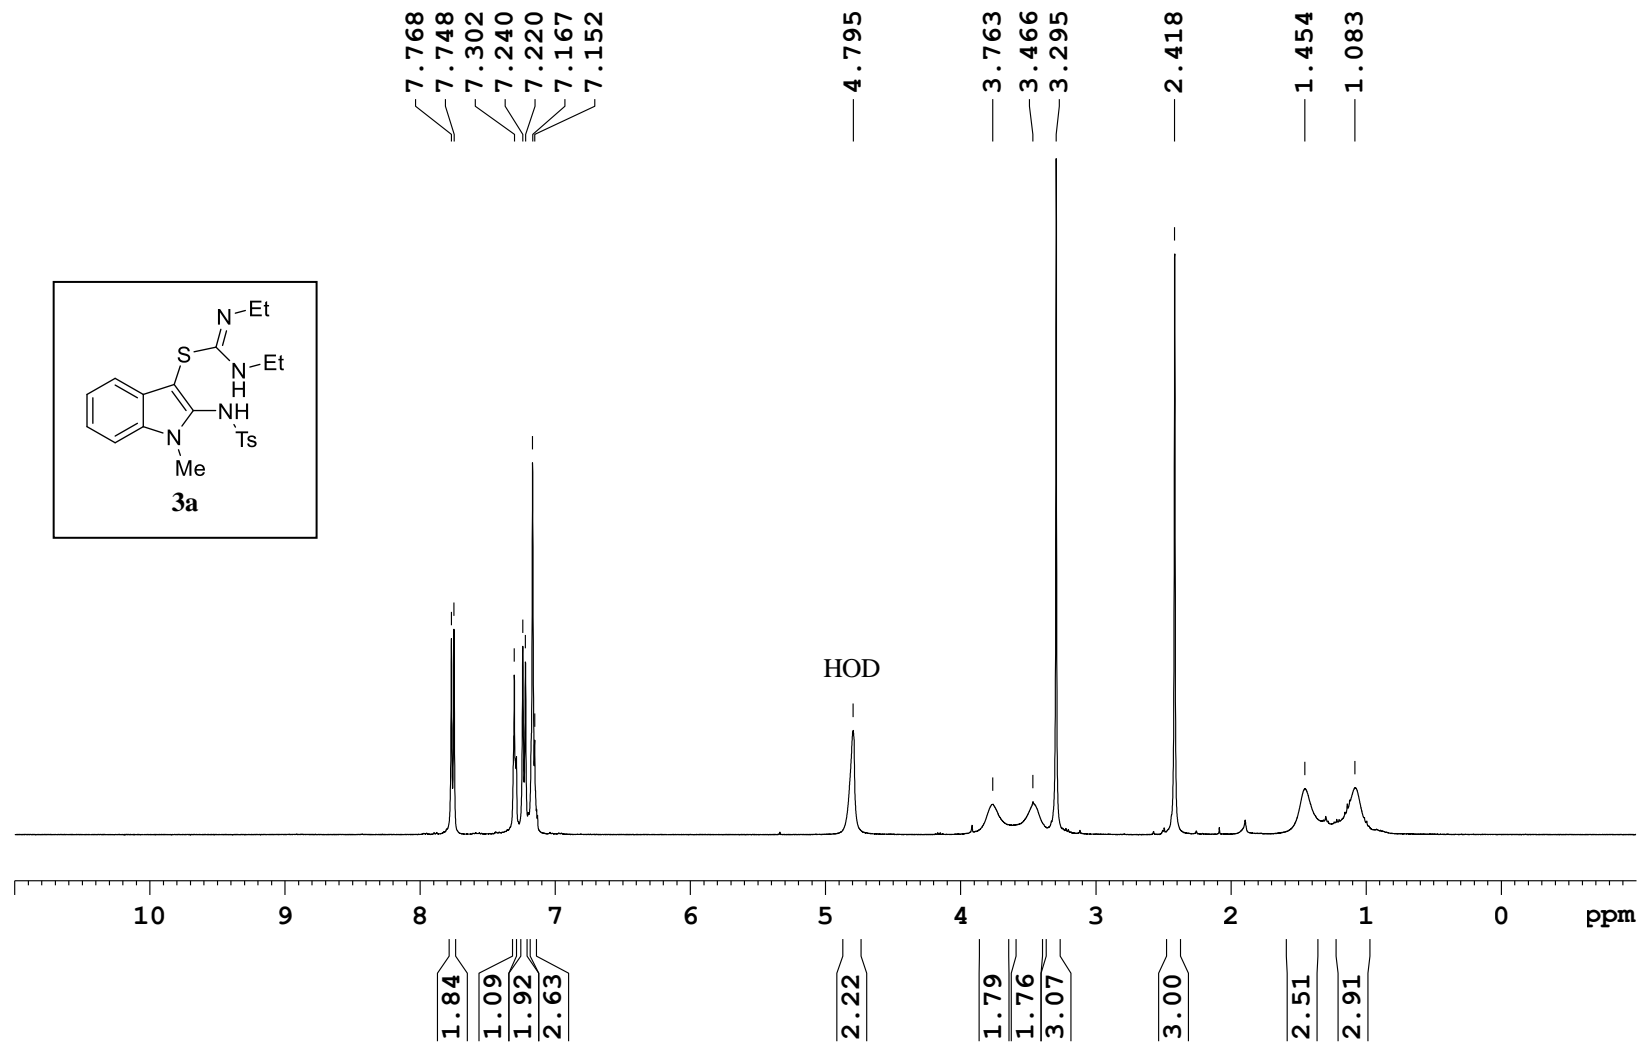

NMR Spectrum of **3a** after D<sub>2</sub>O exchange experiment (CDCl<sub>3</sub>, 400 MHz)

1-Methyl-2-[(4-methylbenzene-1-sulfonyl)amino]-1*H*-indol-3-yl *N,N'*-diethylcarbamimidothioate (**3a**)

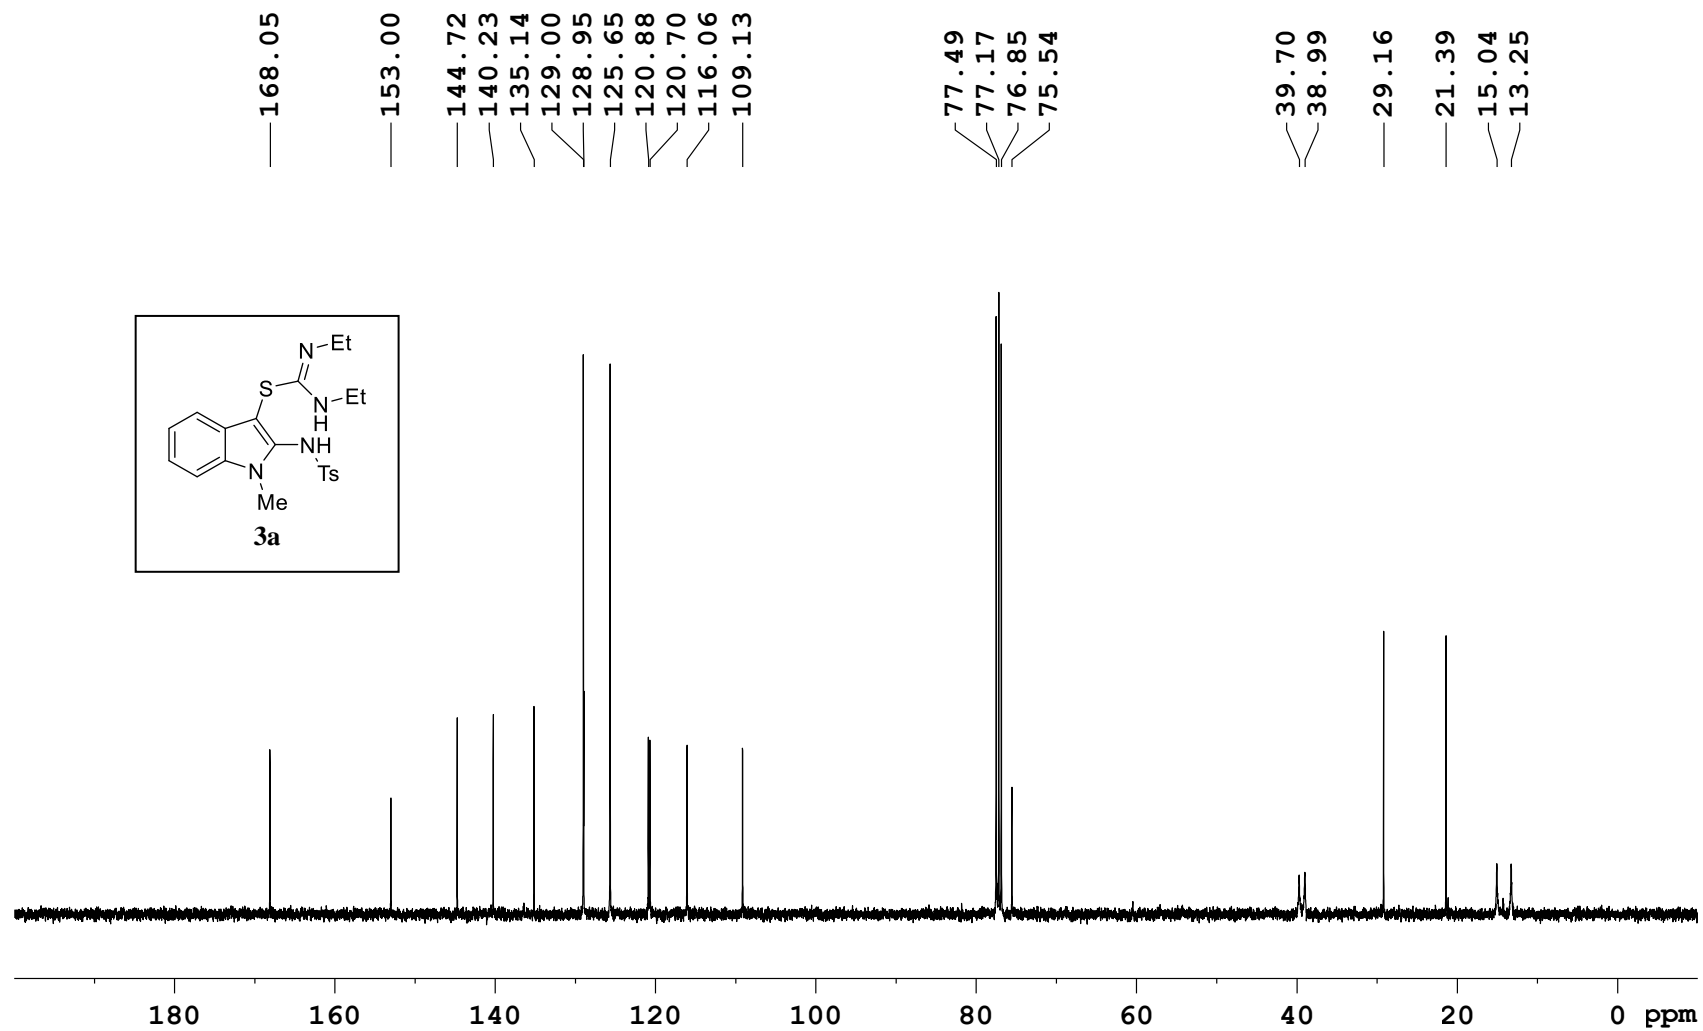

<sup>13</sup>C NMR spectrum of **3a**

**1-Ethyl-2-[(4-methylbenzene-1-sulfonyl)amino]-5-methoxy-1*H*-indol-3-yl *N,N'*-diethylcarbamimidothioate (3b)**

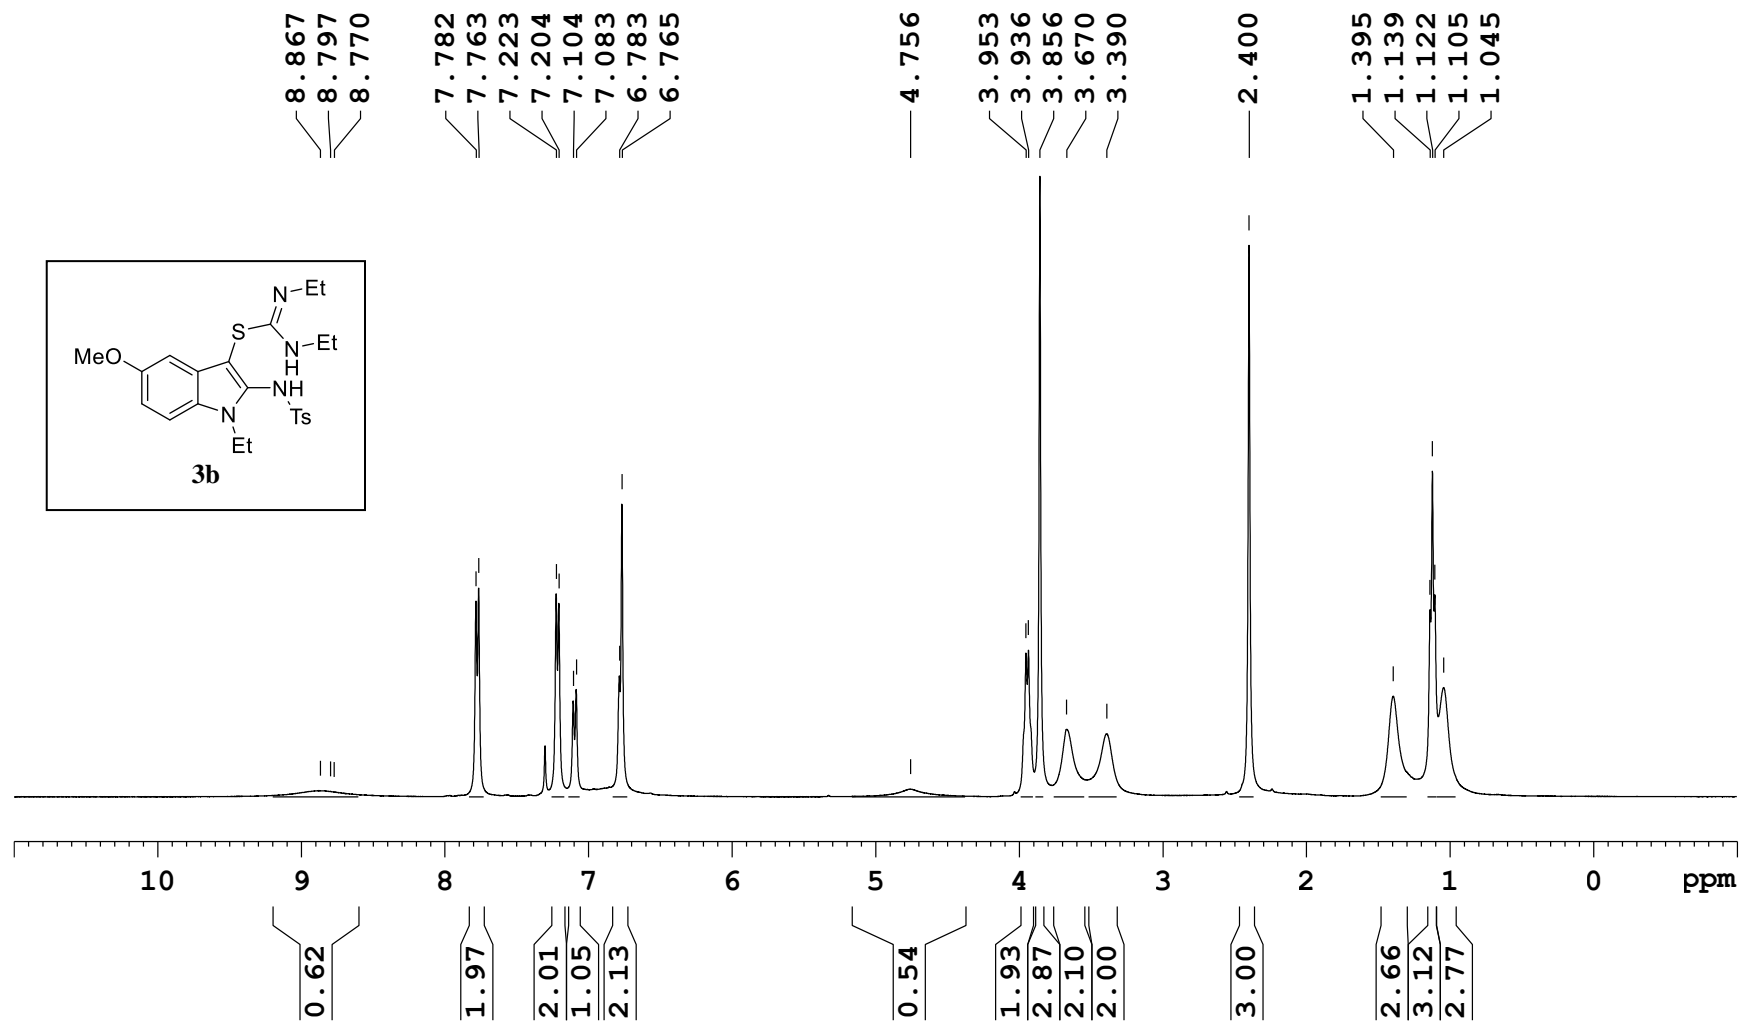

<sup>1</sup>H NMR Spectrum of **3b**



**1-Ethyl-2-[(4-methylbenzene-1-sulfonyl)amino]-5-methoxy-1*H*-indol-3-yl *N,N'*-diethylcarbamimidothioate (3b)**

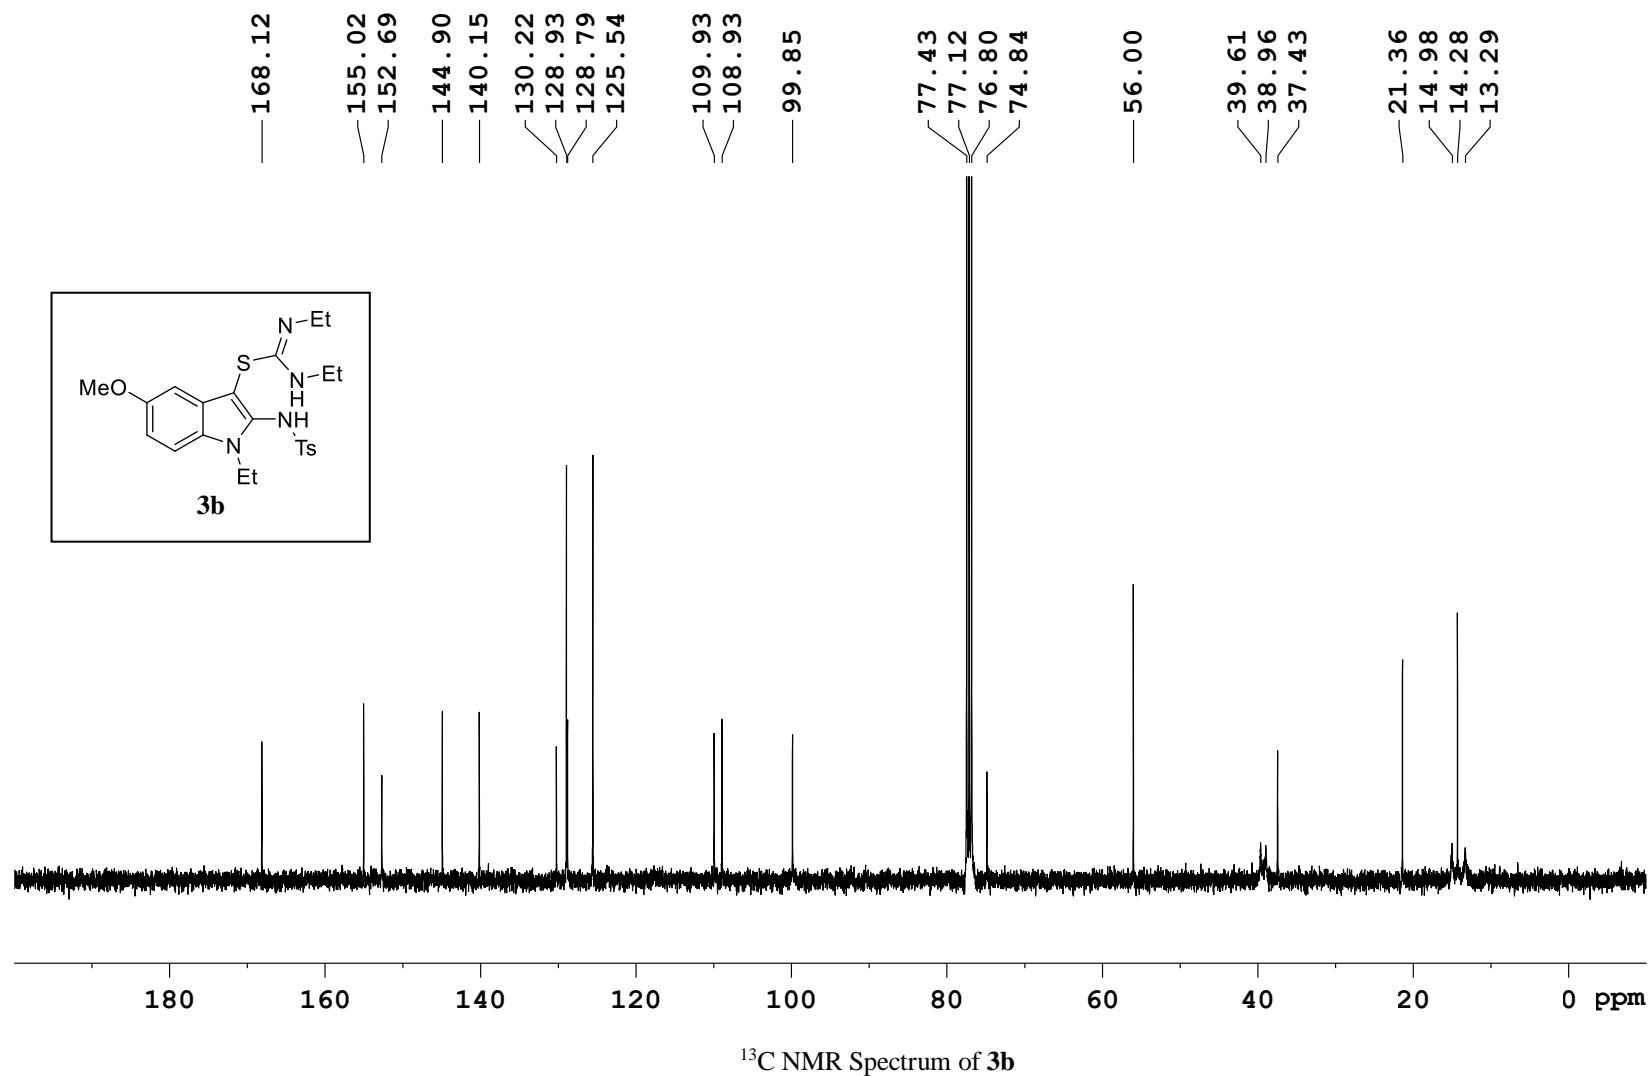

1-Allyl-2-[(4-methylbenzene-1-sulfonyl)amino]-1*H*-indol-3-yl *N,N'*-dibutylcarbamimidothioate (**3c**)

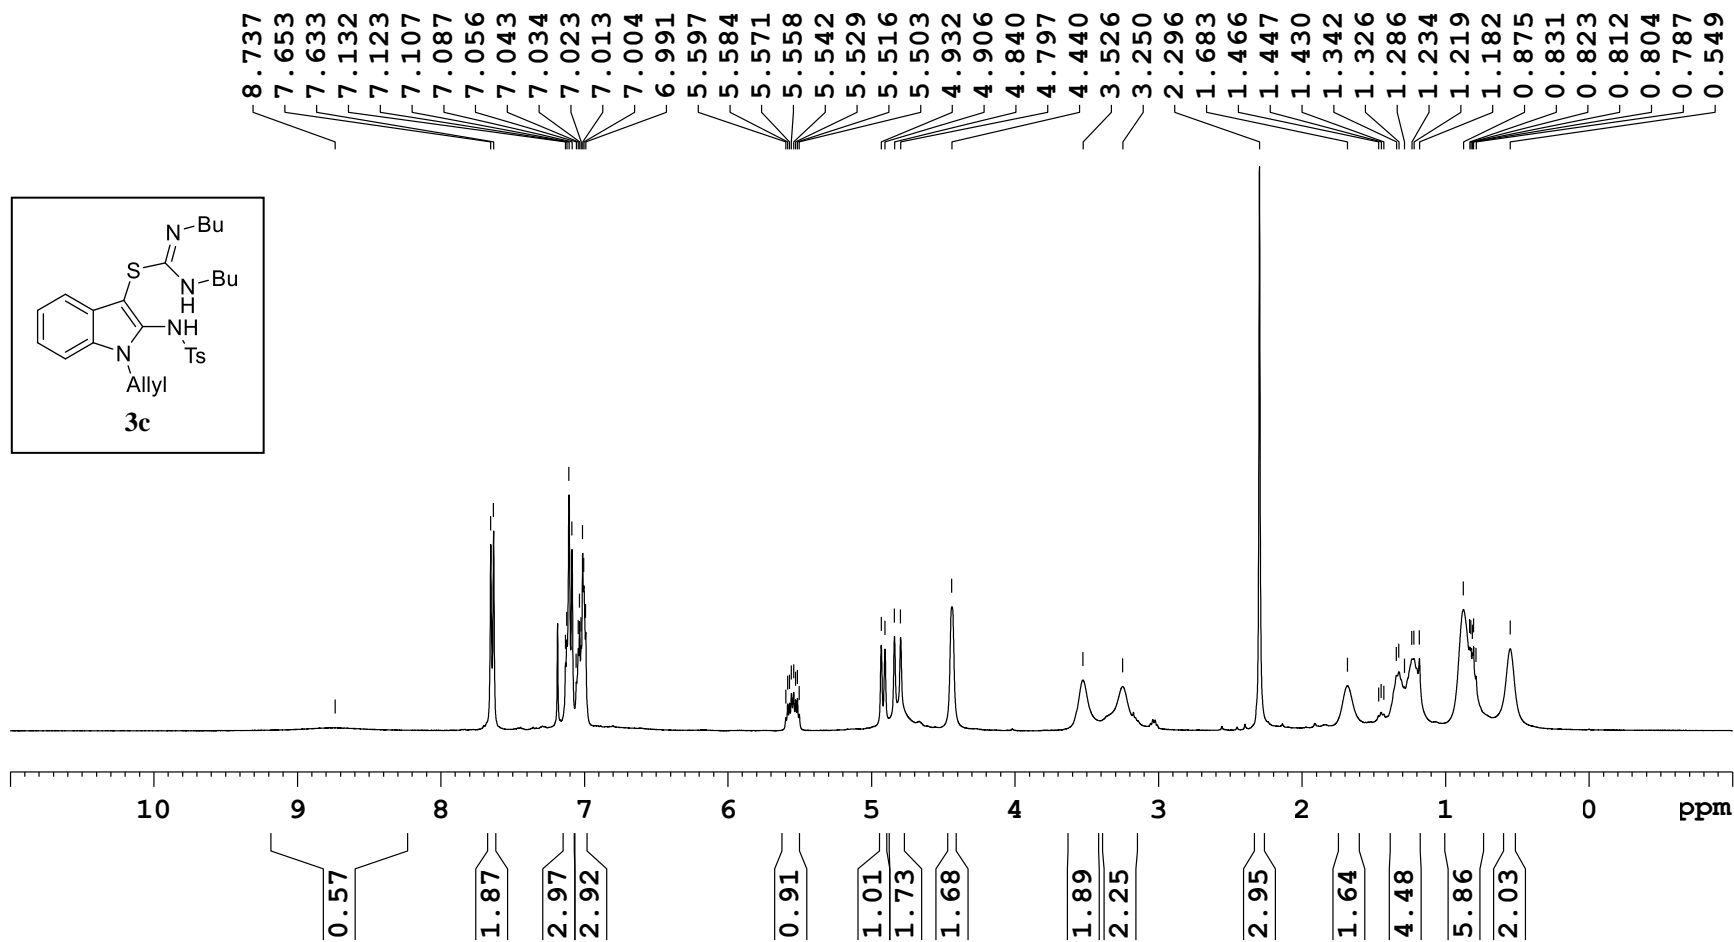

1-Allyl-2-[(4-methylbenzene-1-sulfonyl)amino]-1*H*-indol-3-yl *N,N'*-dibutylcarbamiidothioate (3c)

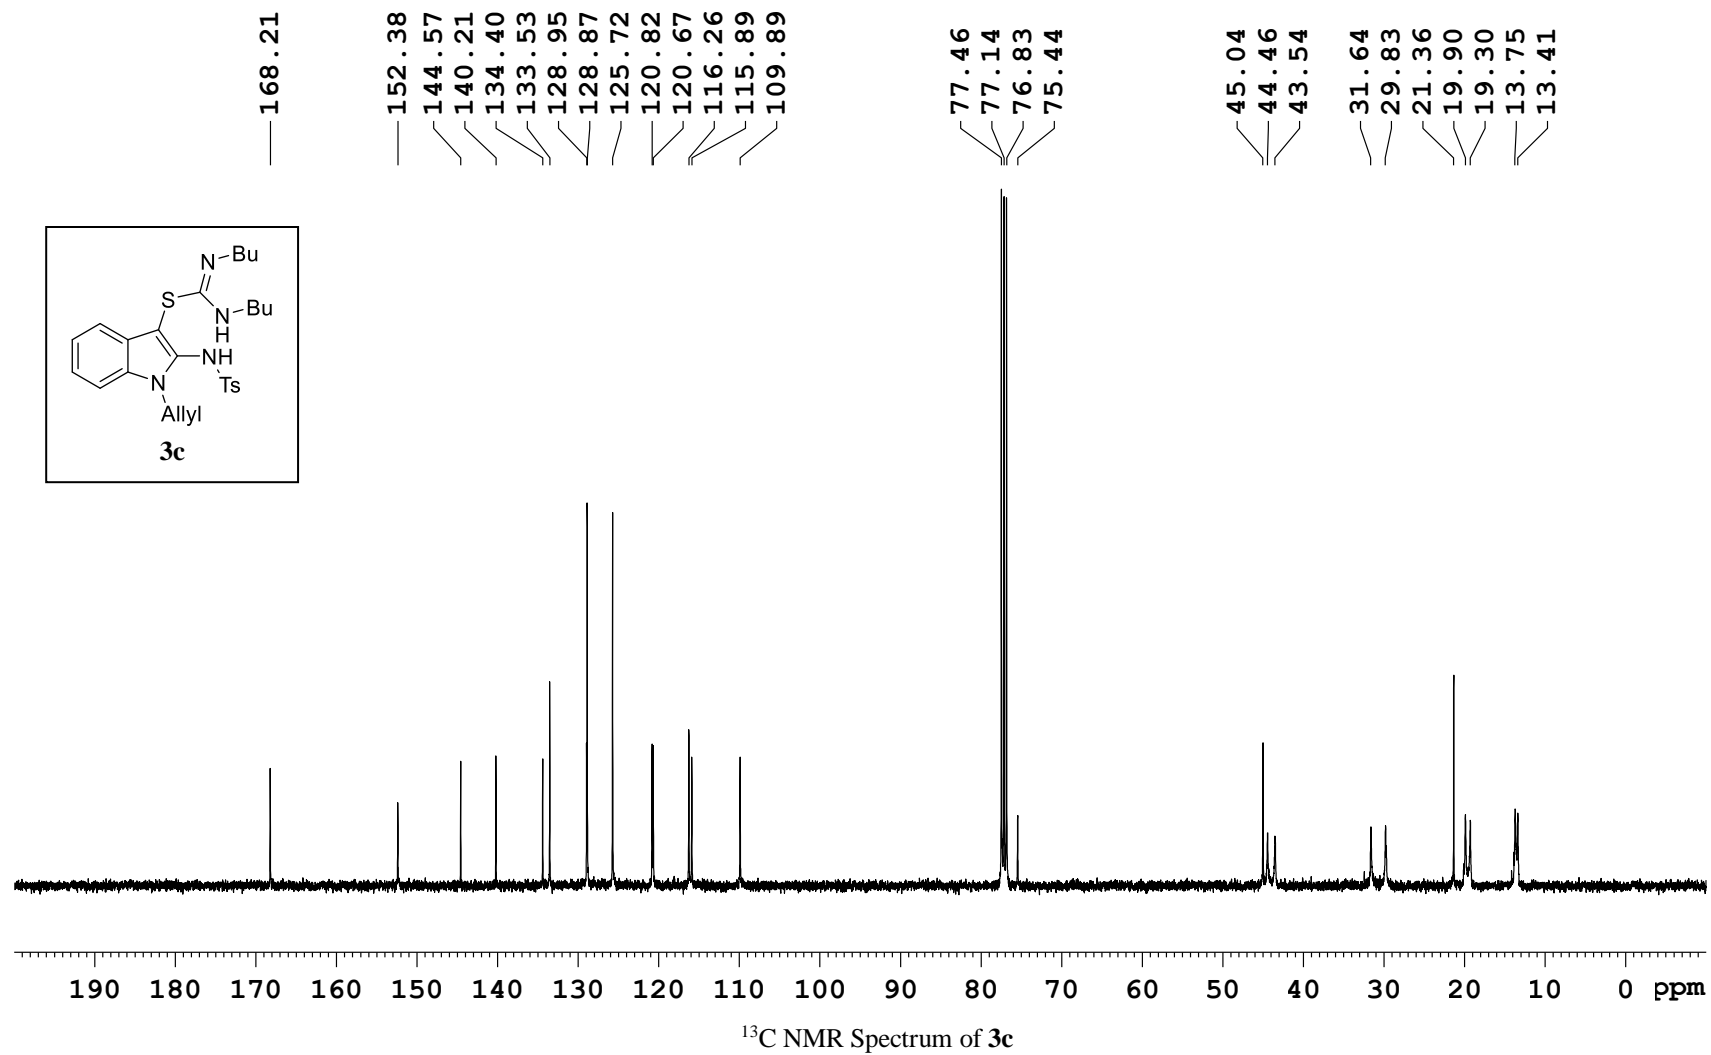

- 168.21
- 152.38
- 144.57
- 140.21
- 134.40
- 133.53
- 128.95
- 128.87
- 125.72
- 120.82
- 120.67
- 116.26
- 115.89
- 109.89
- 77.46
- 77.14
- 76.83
- 75.44
- 45.04
- 44.46
- 43.54
- 31.64
- 29.83
- 21.36
- 19.90
- 19.30
- 13.75
- 13.41

1-Ethyl-2-[(4-methylbenzene-1-sulfonyl)amino]-1*H*-indol-3-yl *N,N'*-diphenylcarbamimidothioate (**3d**)

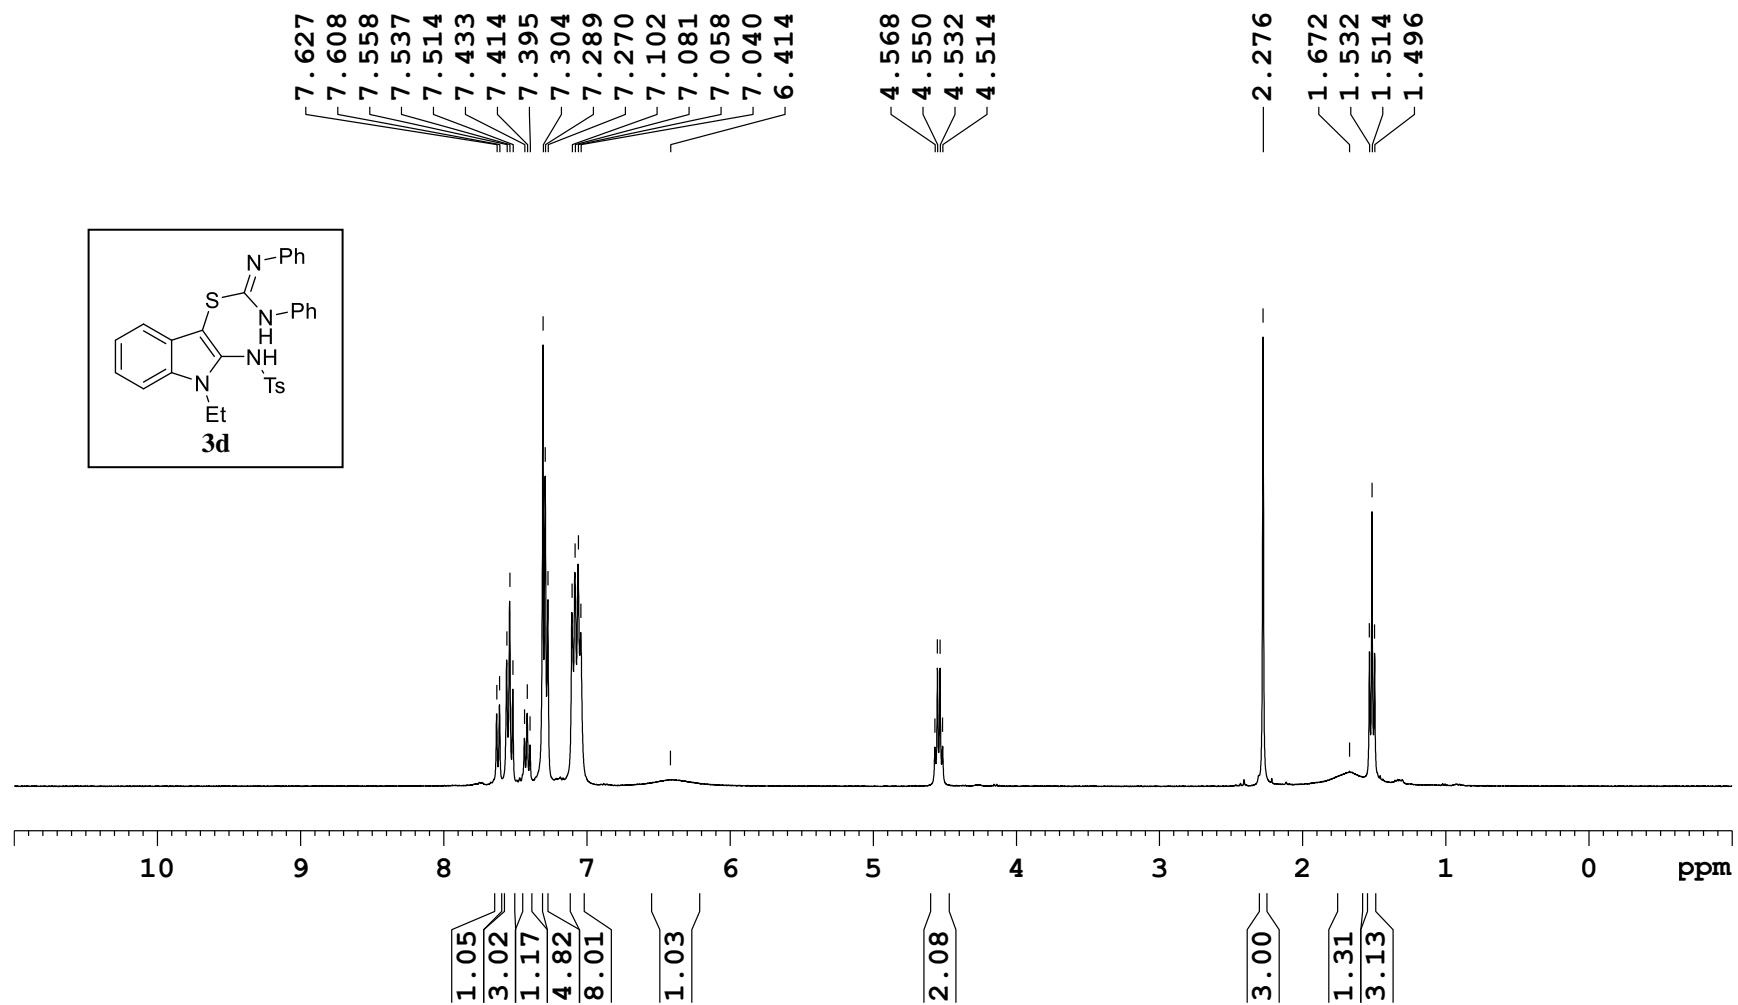

<sup>1</sup>H NMR Spectrum of **3d**

1-Ethyl-2-[(4-methylbenzene-1-sulfonyl)amino]-1*H*-indol-3-yl *N,N'*-diphenylcarbamimidothioate (**3d**)

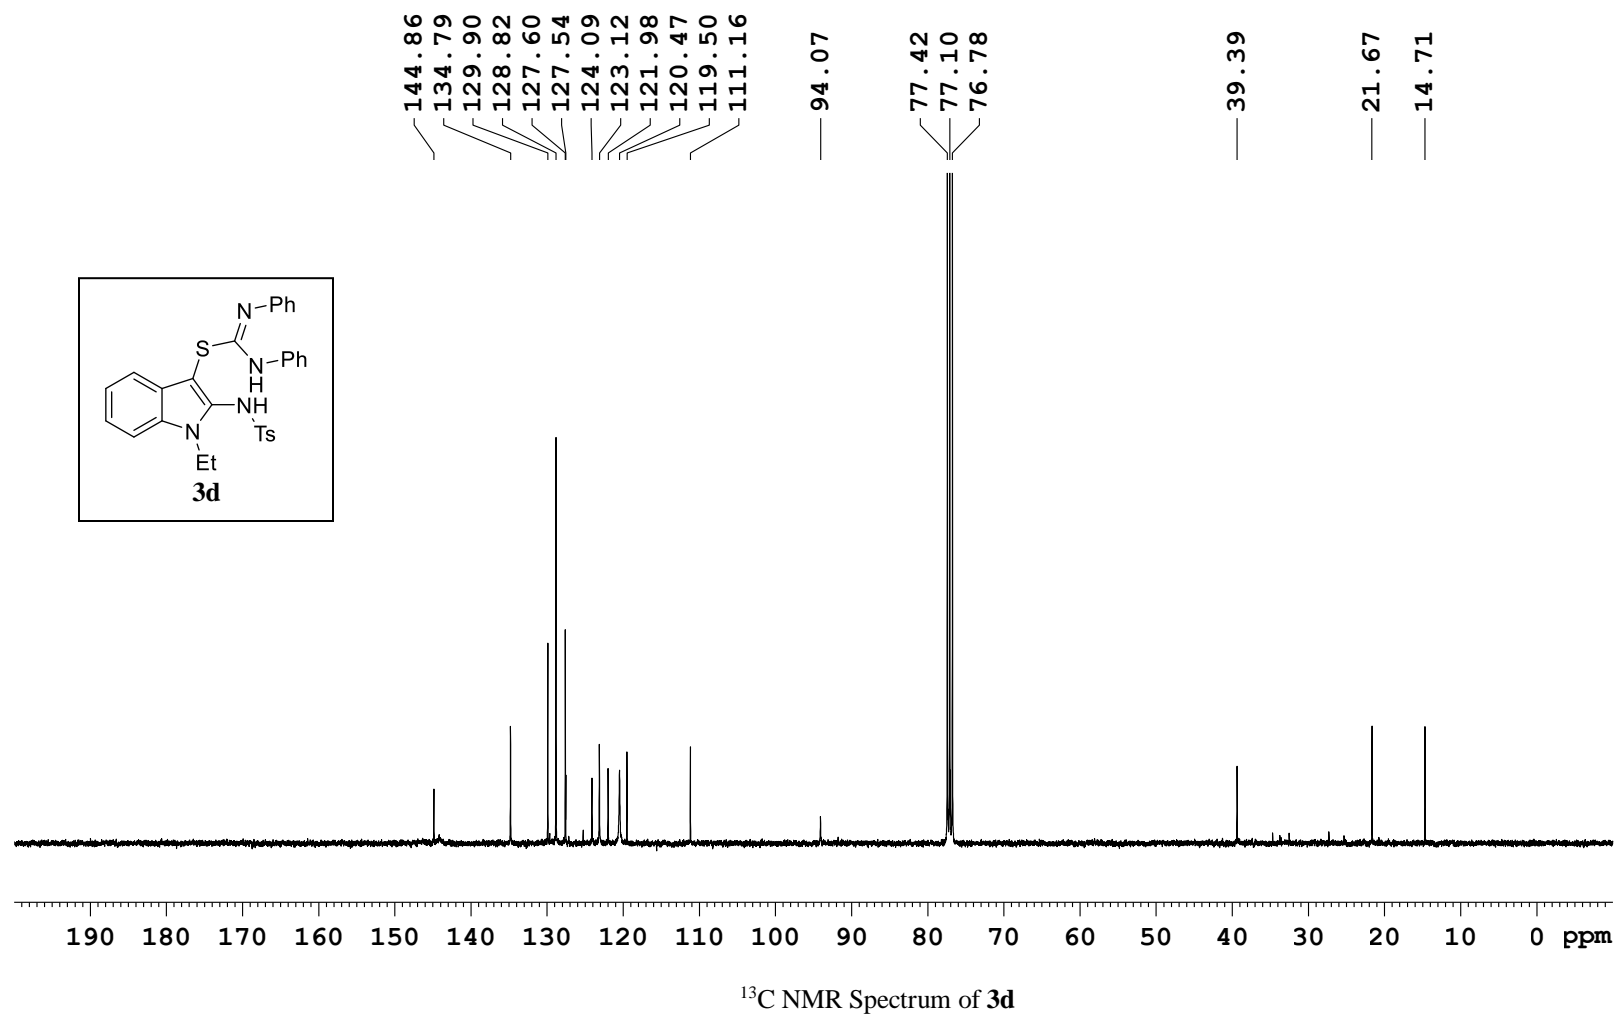

1-Benzyl-2-[(4-methylbenzene-1-sulfonyl)amino]-1*H*-indol-3-yl *N,N'*-dimethylcarbamimidothioate (**3e**)

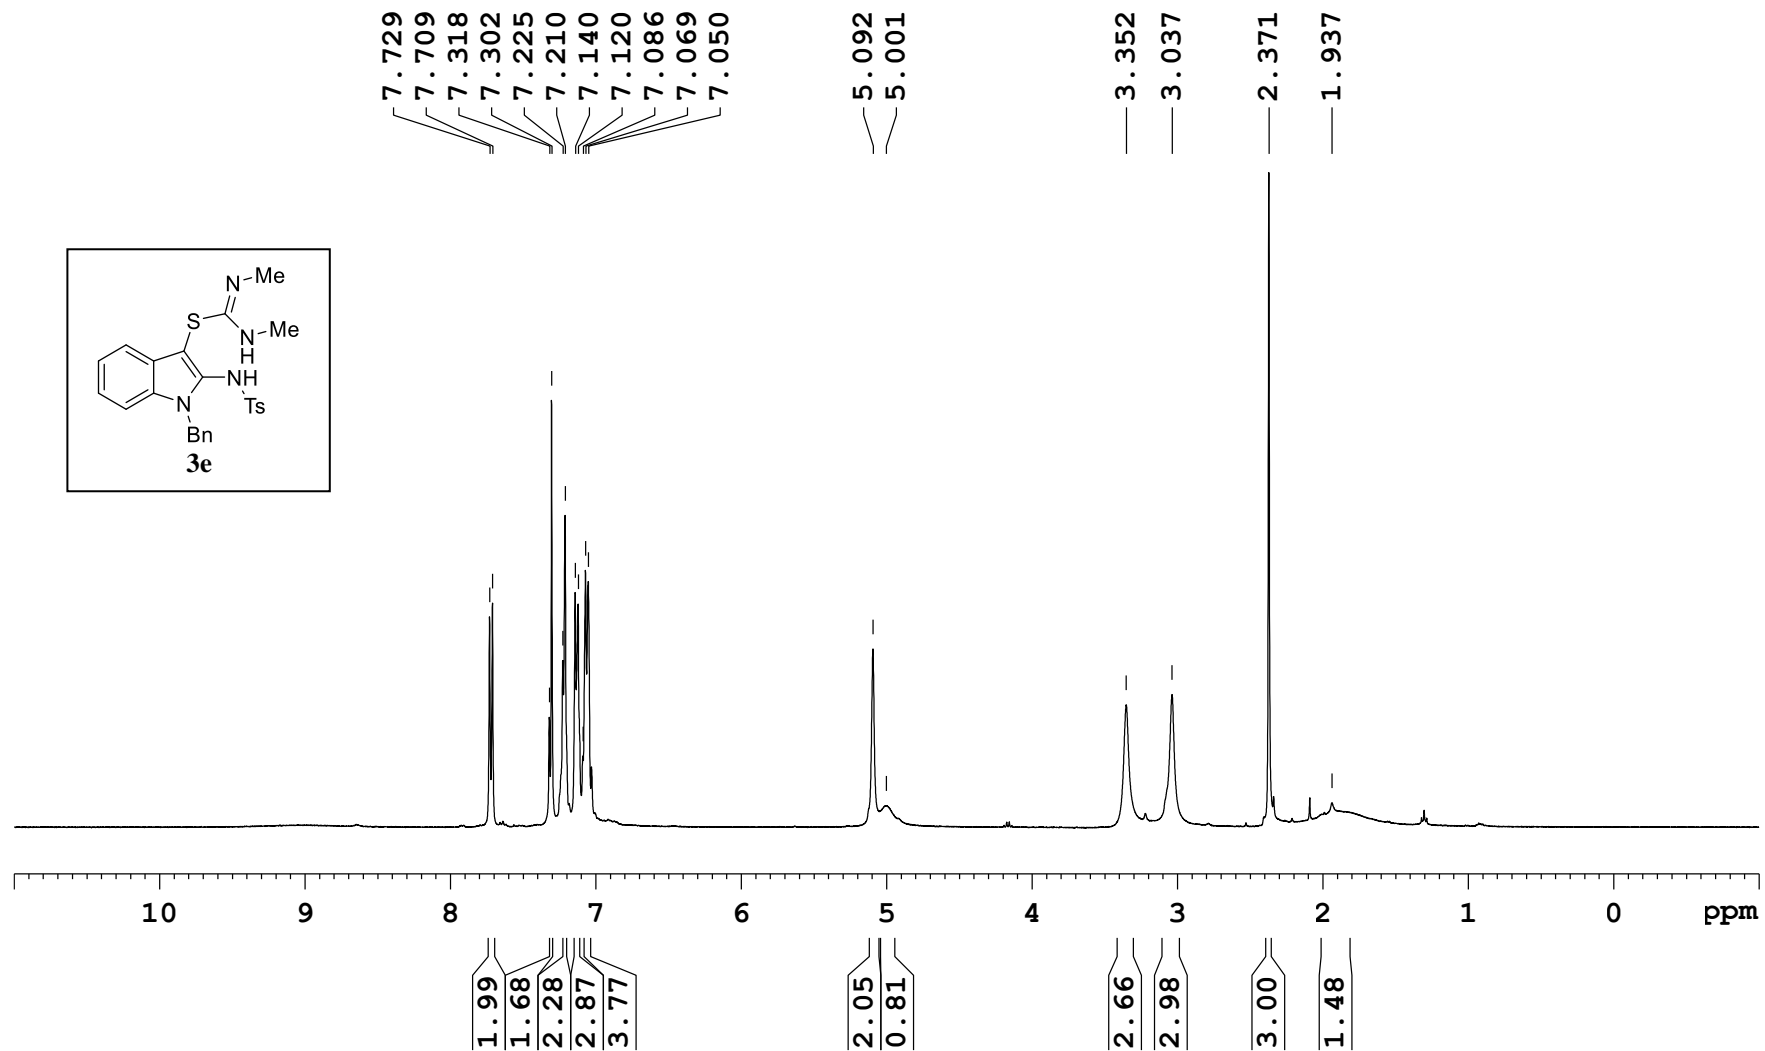

<sup>1</sup>H NMR Spectrum of **3e**

1-Benzyl-2-[(4-methylbenzene-1-sulfonyl)amino]-1H-indol-3-yl *N,N'*-dimethylcarbamimidothioate (**3e**)

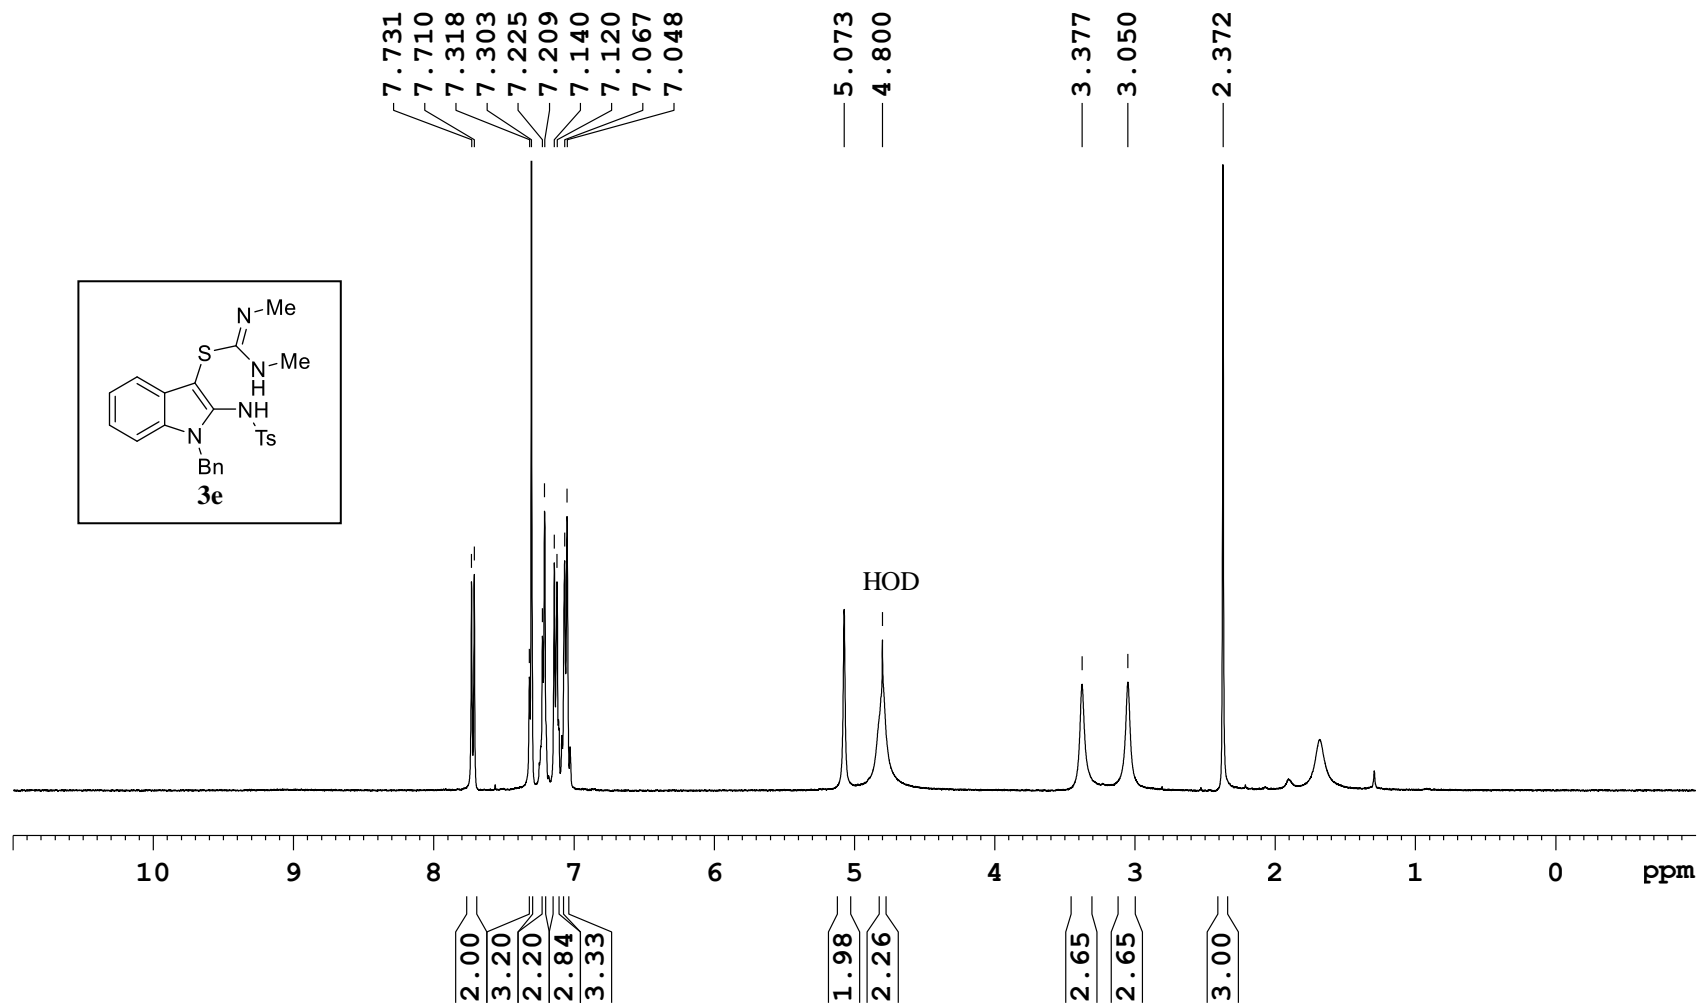

NMR spectrum of **3e** after D<sub>2</sub>O exchange experiment (CDCl<sub>3</sub>, 400 MHz)

1-Benzyl-2-[(4-methylbenzene-1-sulfonyl)amino]-1*H*-indol-3-yl *N,N'*-dimethylcarbamimidothioate (**3e**)

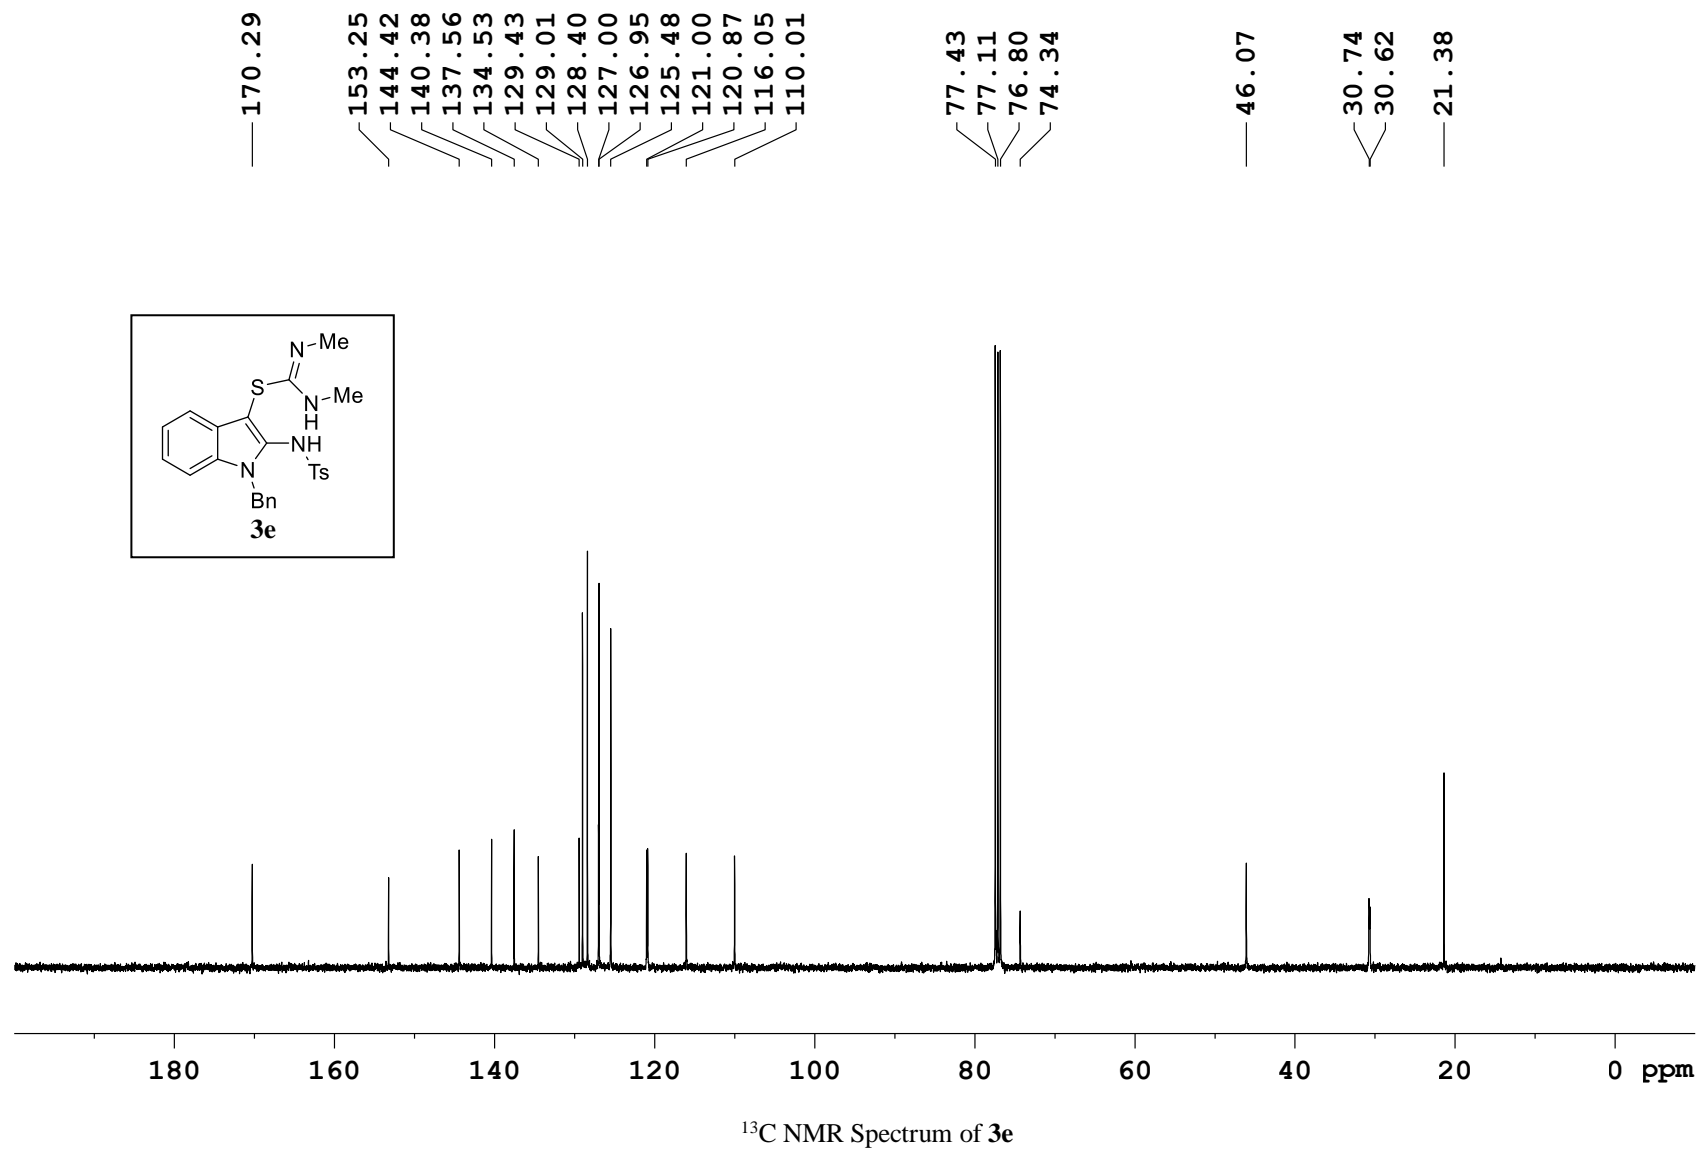



**1-Methyl-2-[(4-methylbenzene-1-sulfonyl)amino]-1*H*-indol-3-yl *N,N'*-dimethylcarbamimidothioate (3f)**

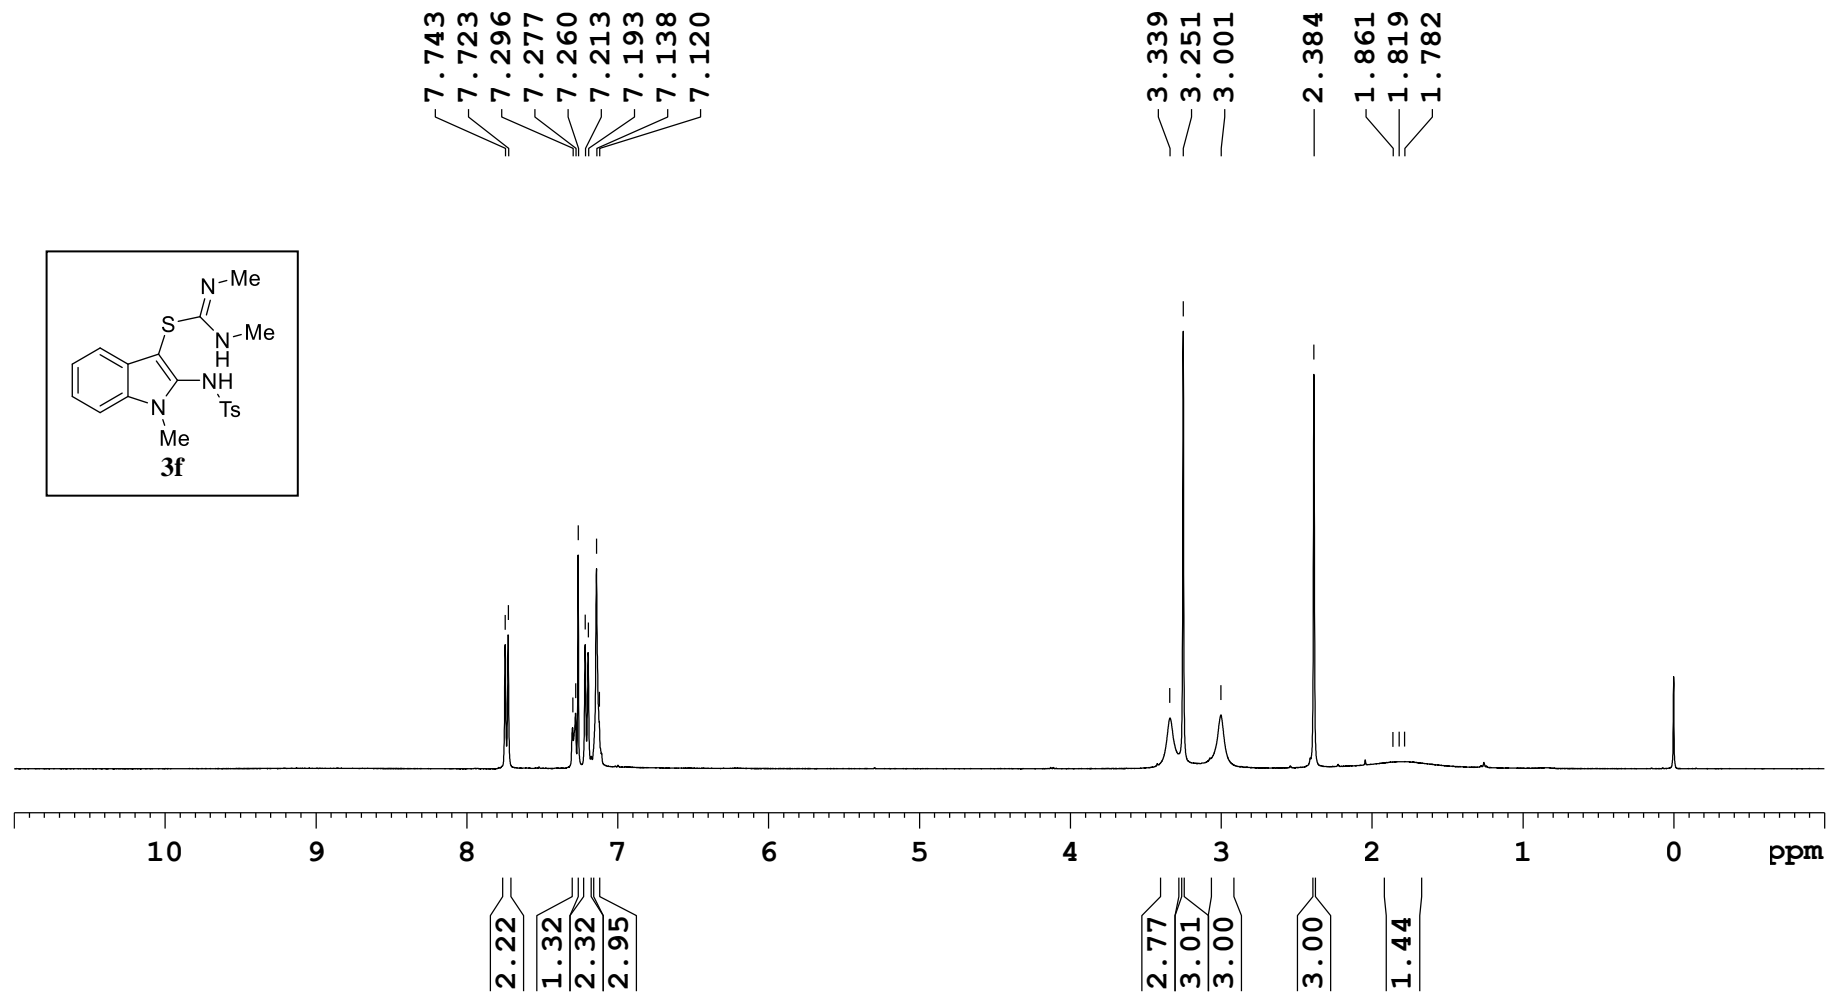

<sup>1</sup>H NMR Spectrum of **3f**

1-Methyl-2-[(4-methylbenzene-1-sulfonyl)amino]-1*H*-indol-3-yl *N,N'*-dimethylcarbamimidothioate (3f)

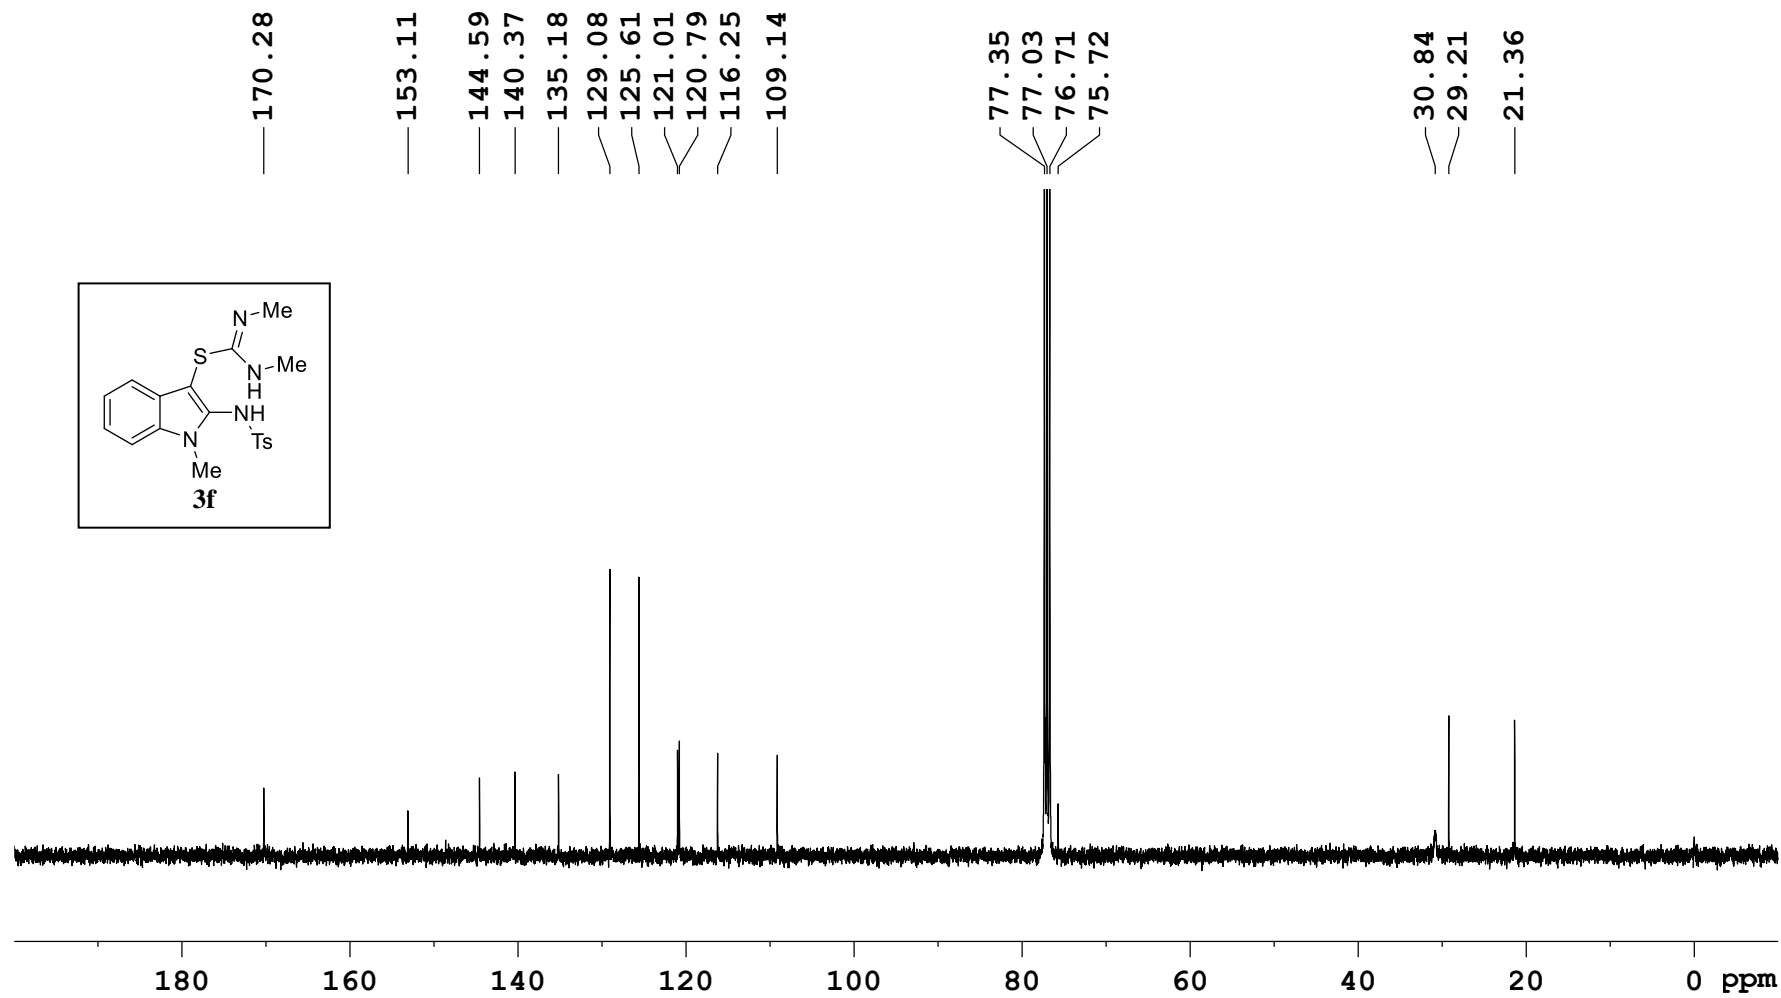

<sup>13</sup>C NMR Spectrum of 3f

1-Ethyl-2-[(4-methylbenzene-1-sulfonyl)amino]-5-bromo-1*H*-indol-3-yl *N,N'*-dibutylcarbamimidothioate (**3g**)

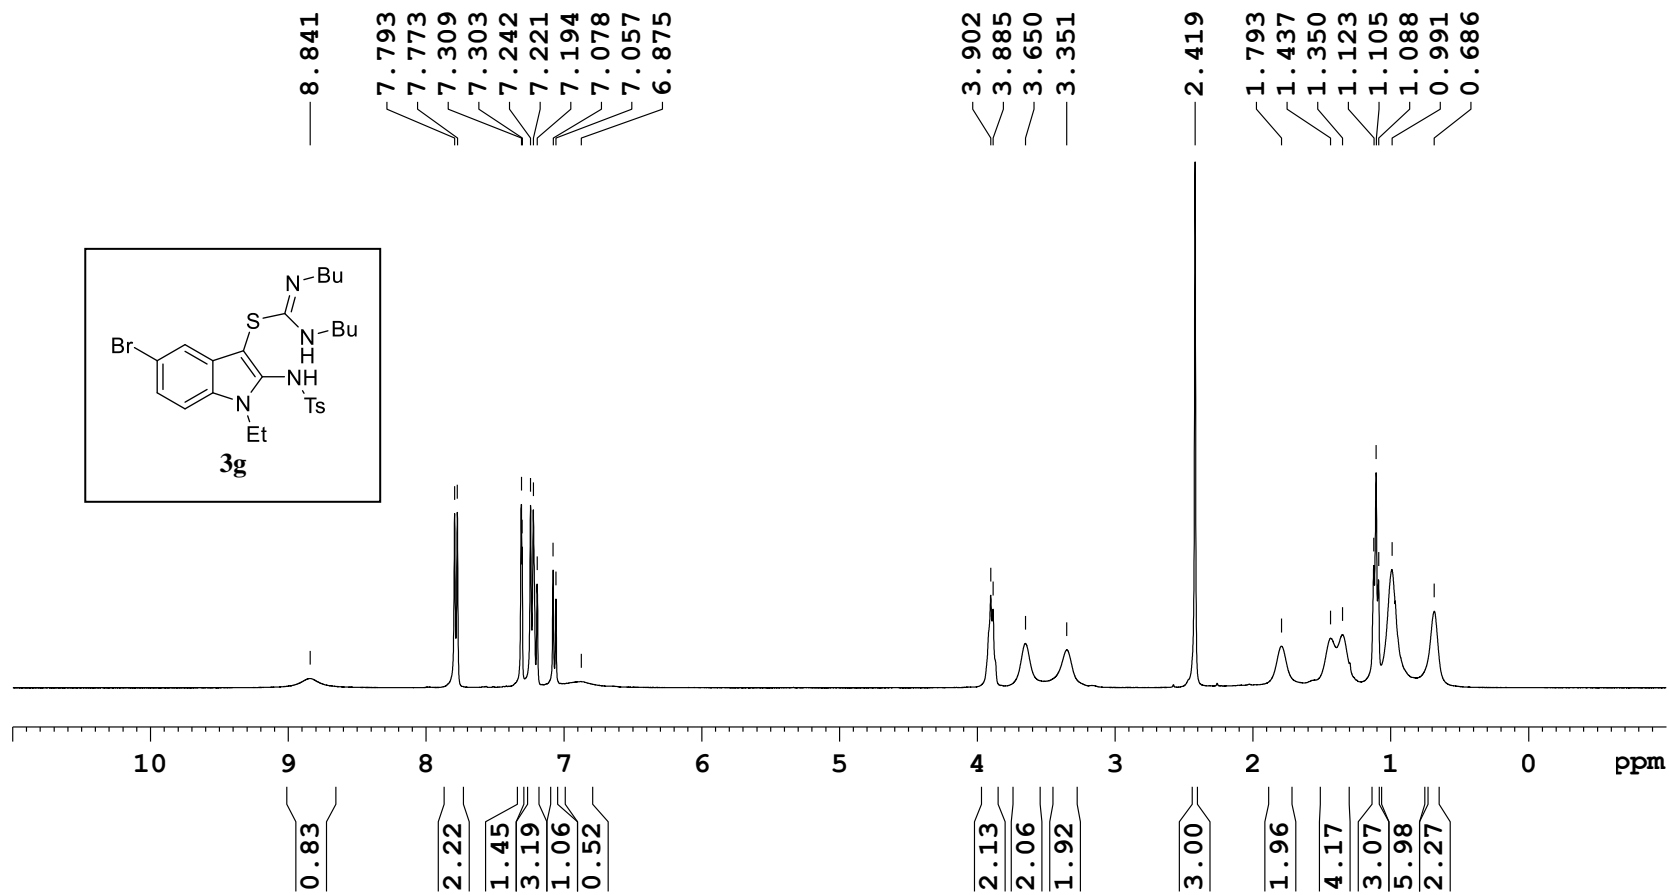

<sup>1</sup>H NMR Spectrum of **3g**

1-Ethyl-2-[(4-methylbenzene-1-sulfonyl)amino]-5-bromo-1*H*-indol-3-yl *N,N'*-dibutylcarbamimidothioate (**3g**)

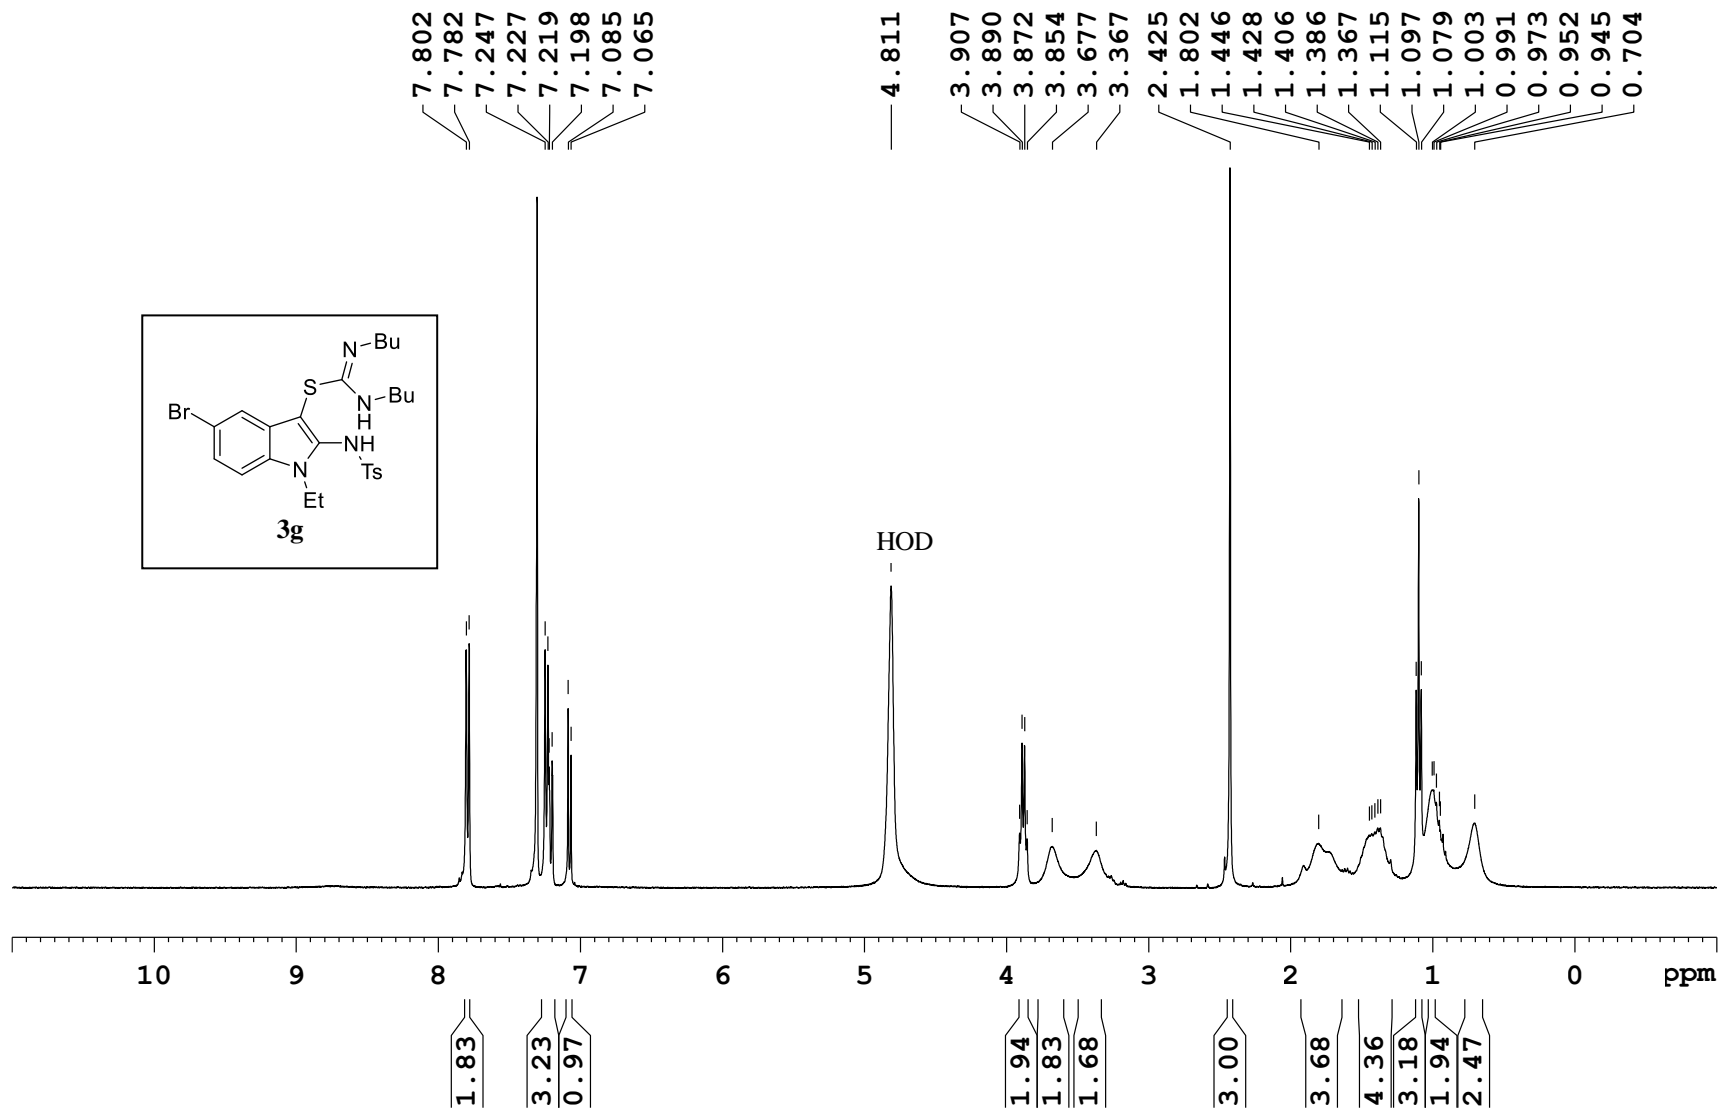

NMR spectrum of **3g** after D<sub>2</sub>O exchange experiment (CDCl<sub>3</sub>, 400 MHz)

1-Ethyl-2-[(4-methylbenzene-1-sulfonyl)amino]-5-bromo-1*H*-indol-3-yl *N,N'*-dibutylcarbamimidothioate (3g)

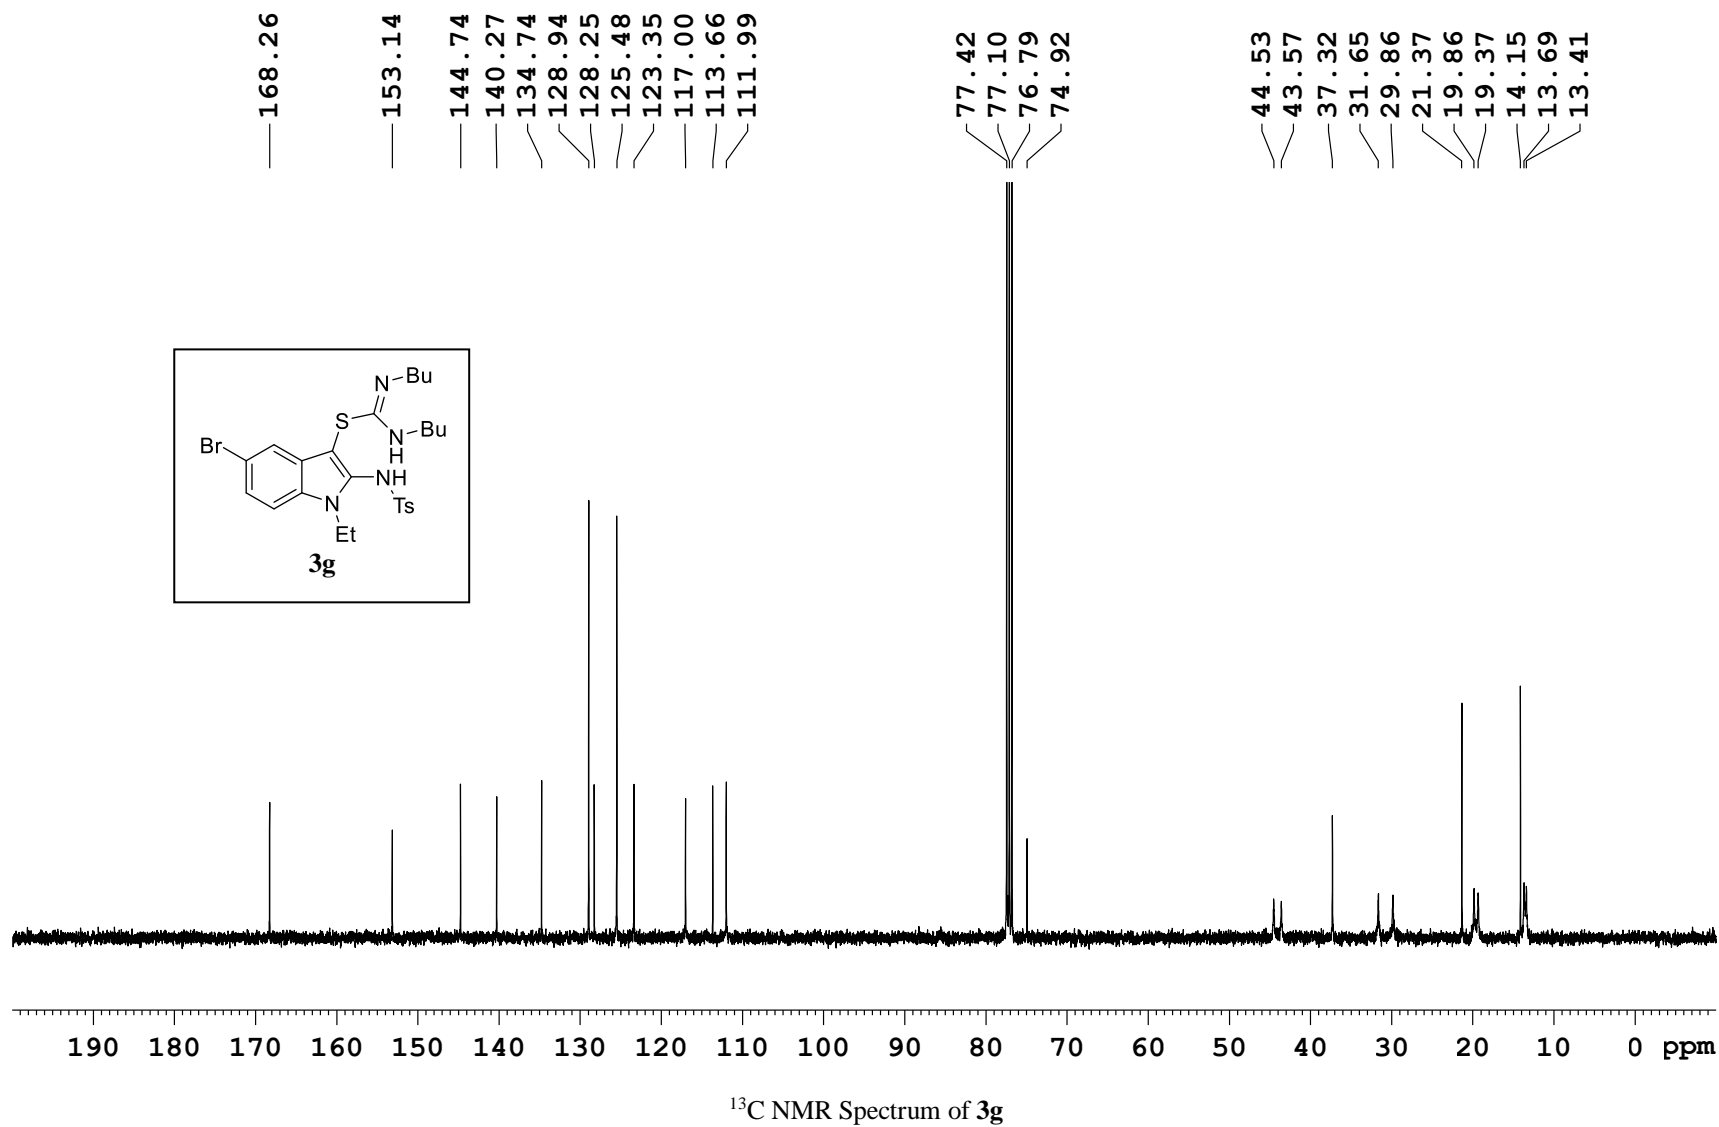

1-Allyl-2-[(4-methylbenzene-1-sulfonyl)amino]-1*H*-indol-3-yl *N*-methylcarbamimidothioate (3h)

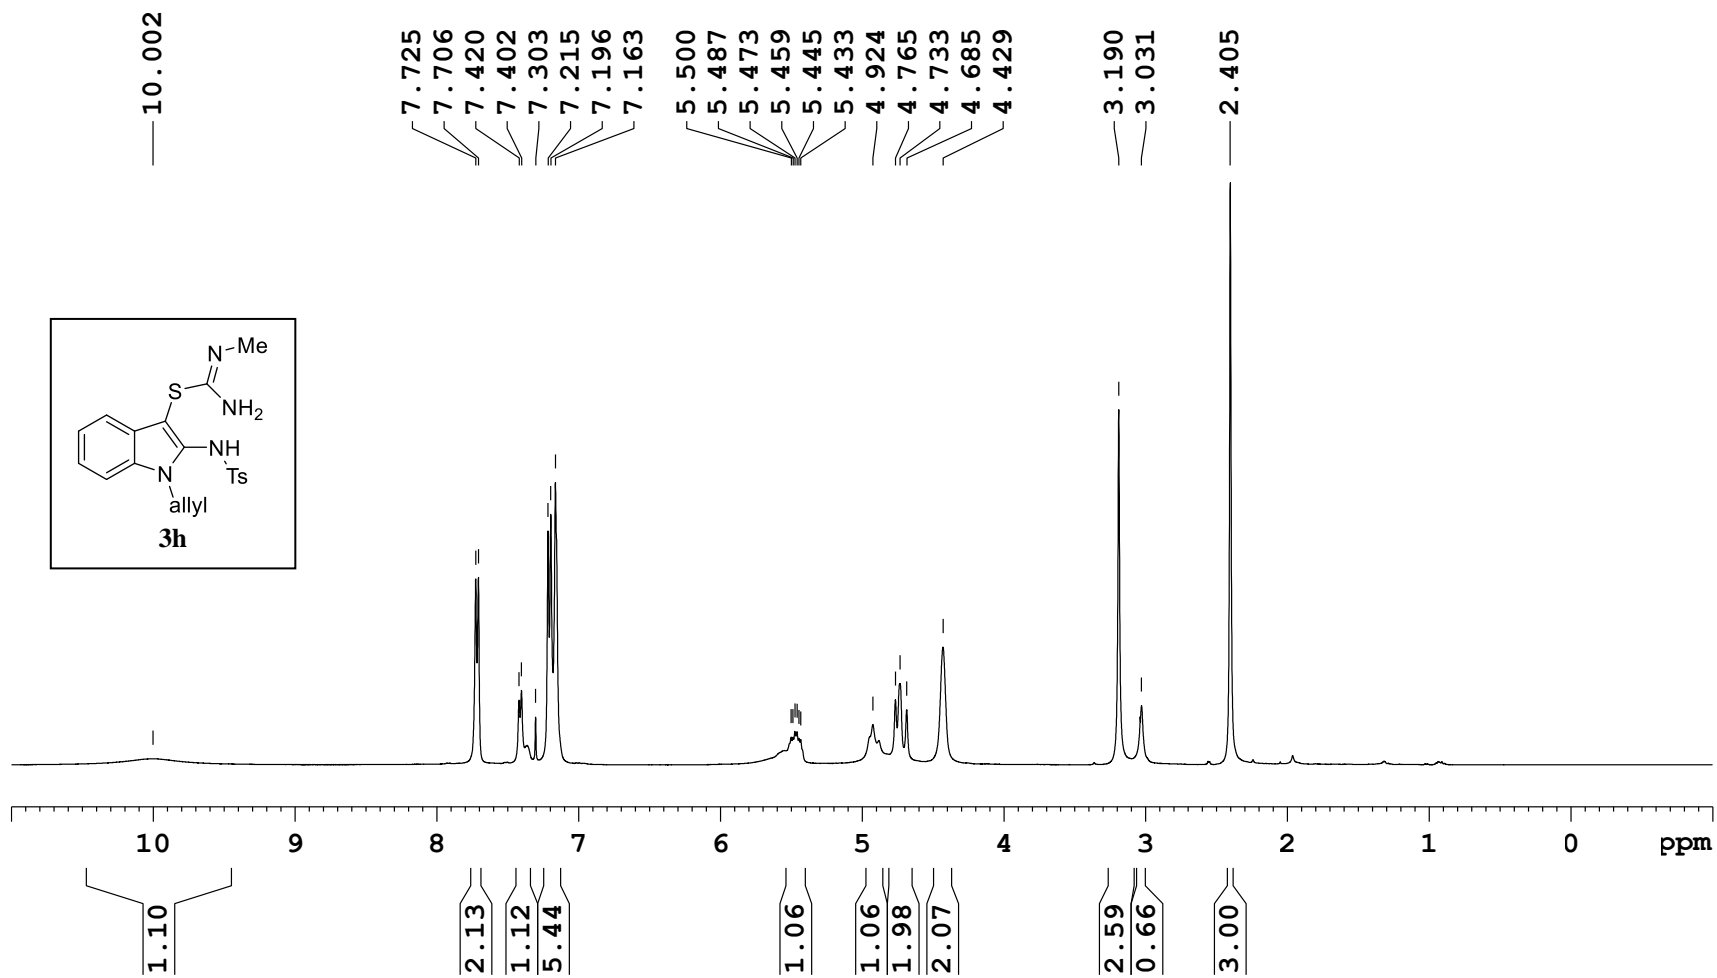

1-Allyl-2-[(4-methylbenzene-1-sulfonyl)amino]-1*H*-indol-3-yl *N*-methylcarbamimidothioate (**3h**)

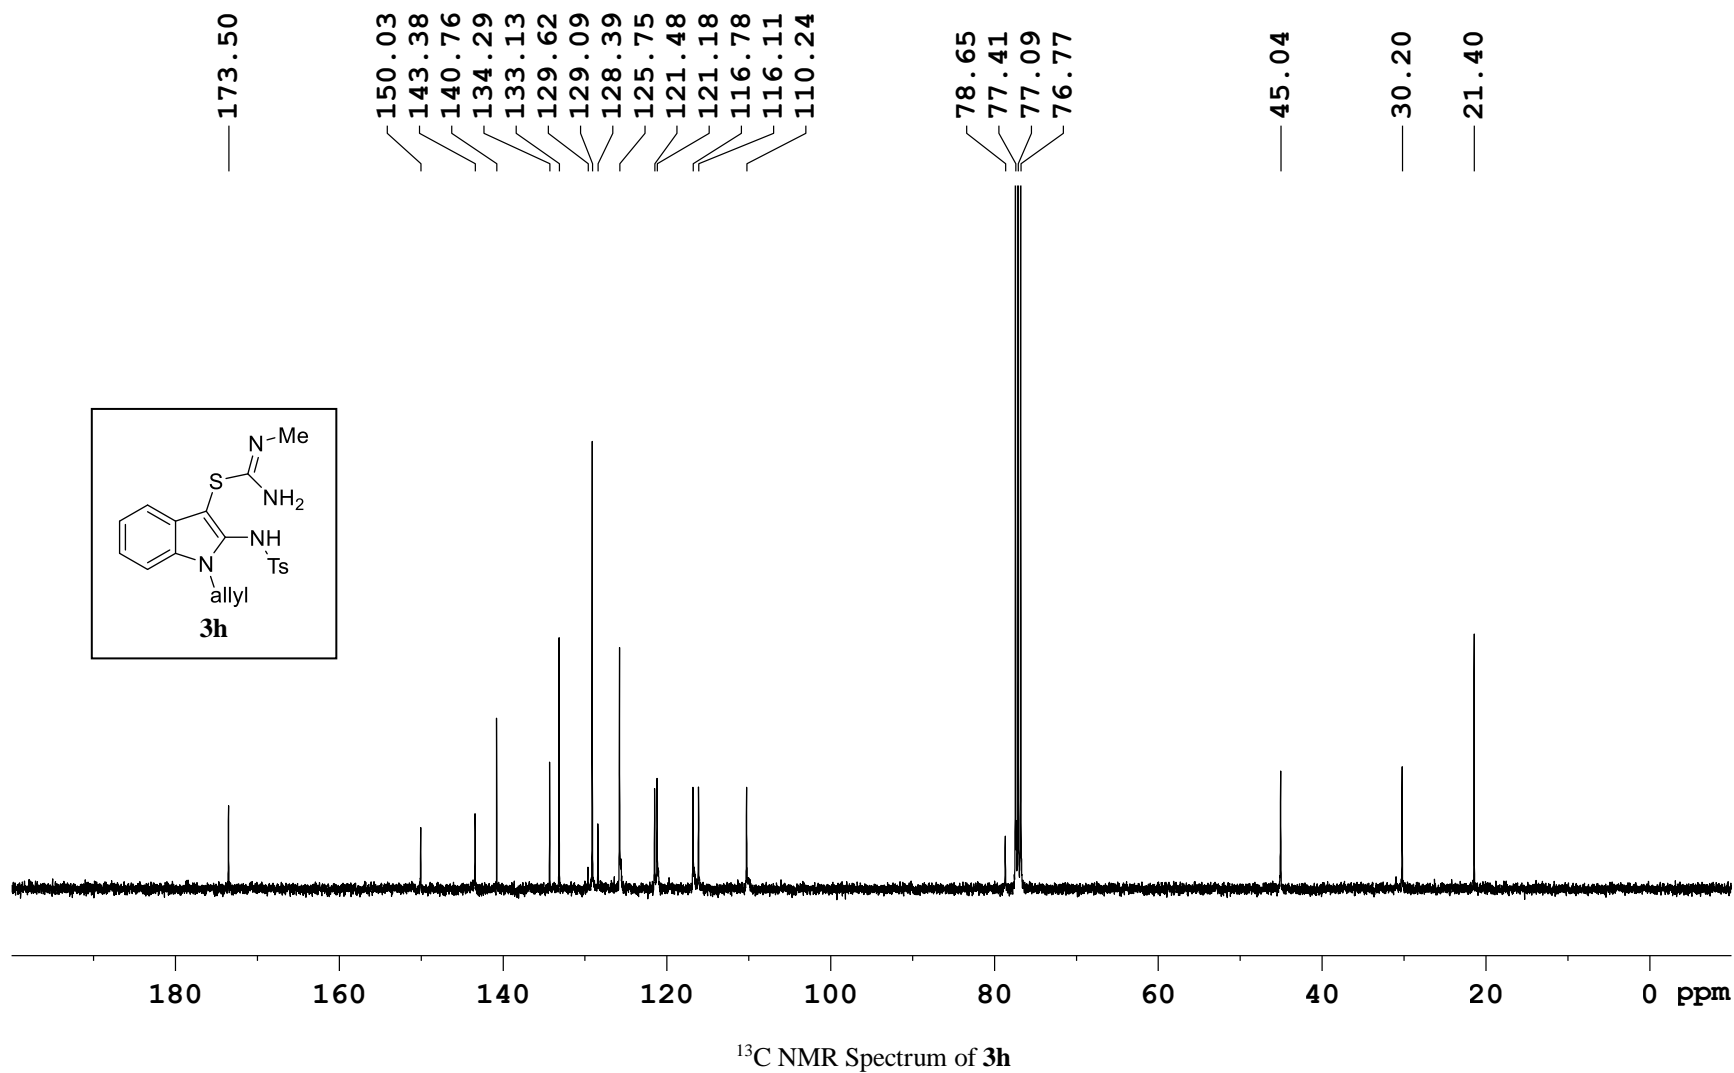

**1-Benzyl-2-[(4-methylbenzene-1-sulfonyl)amino]]-5-bromo-1*H*-indol-3-yl *N*-allylcarbamimidothioate (3i)**

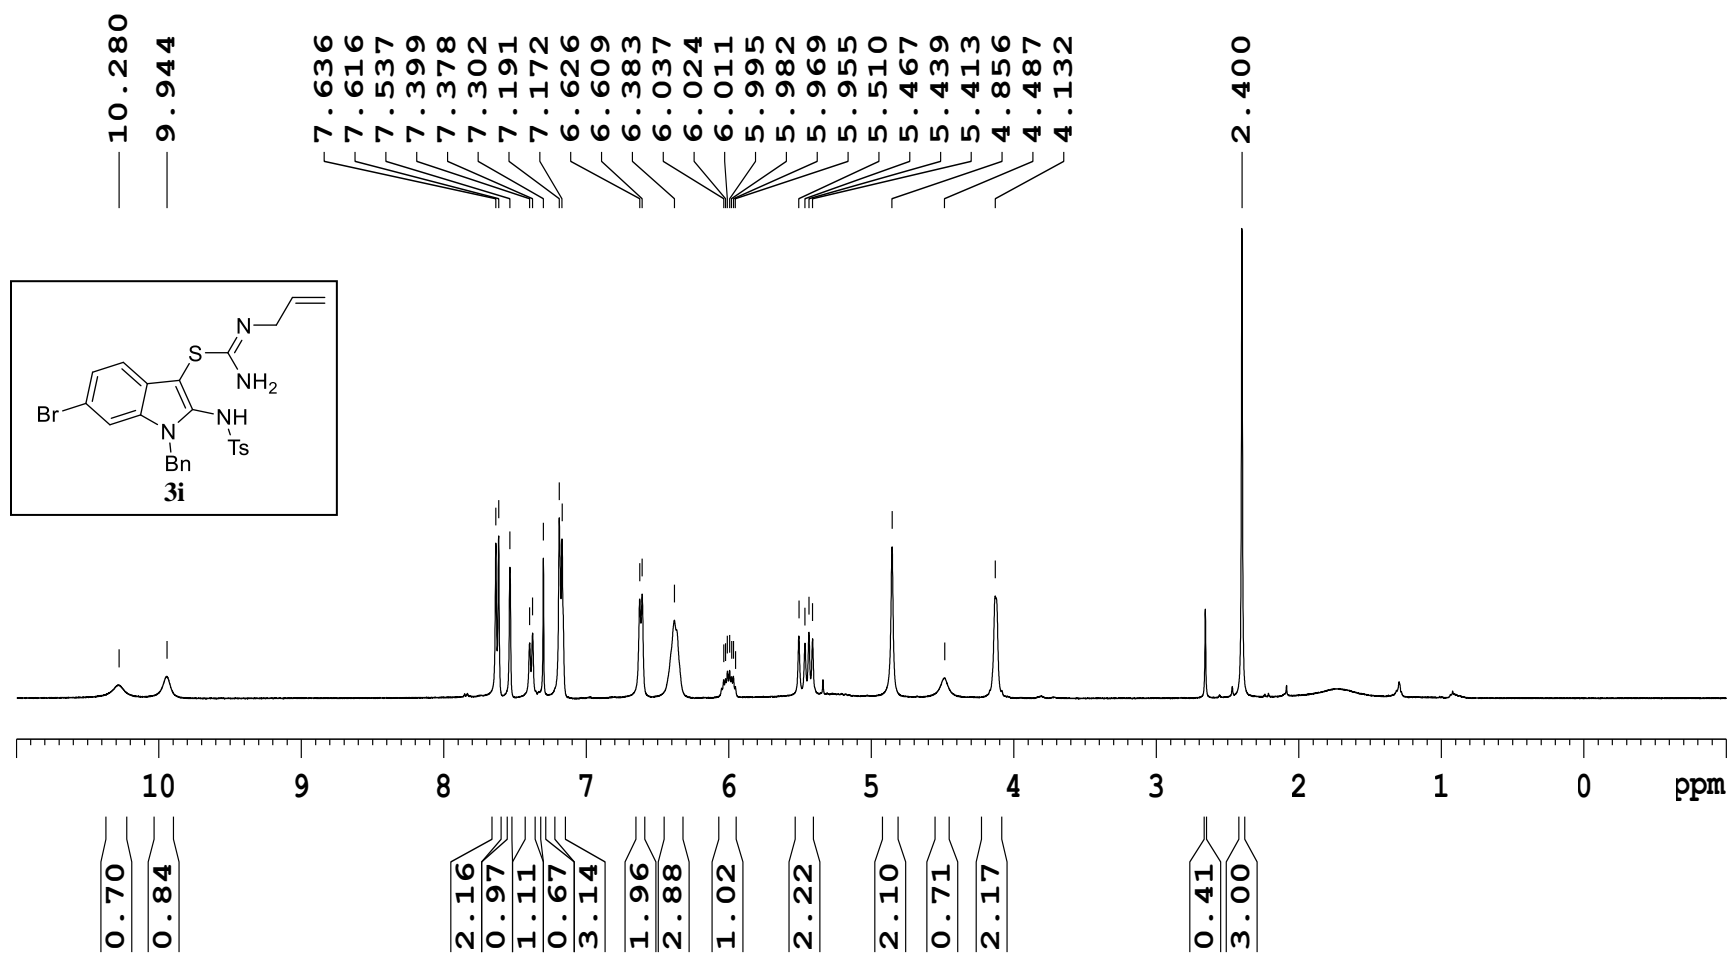

<sup>1</sup>H NMR Spectrum of **3i**



1-Benzyl-2-[(4-methylbenzene-1-sulfonyl)amino] ]-5-bromo-1*H*-indol-3-yl *N*-allylcarbamimidothioate (**3i**)

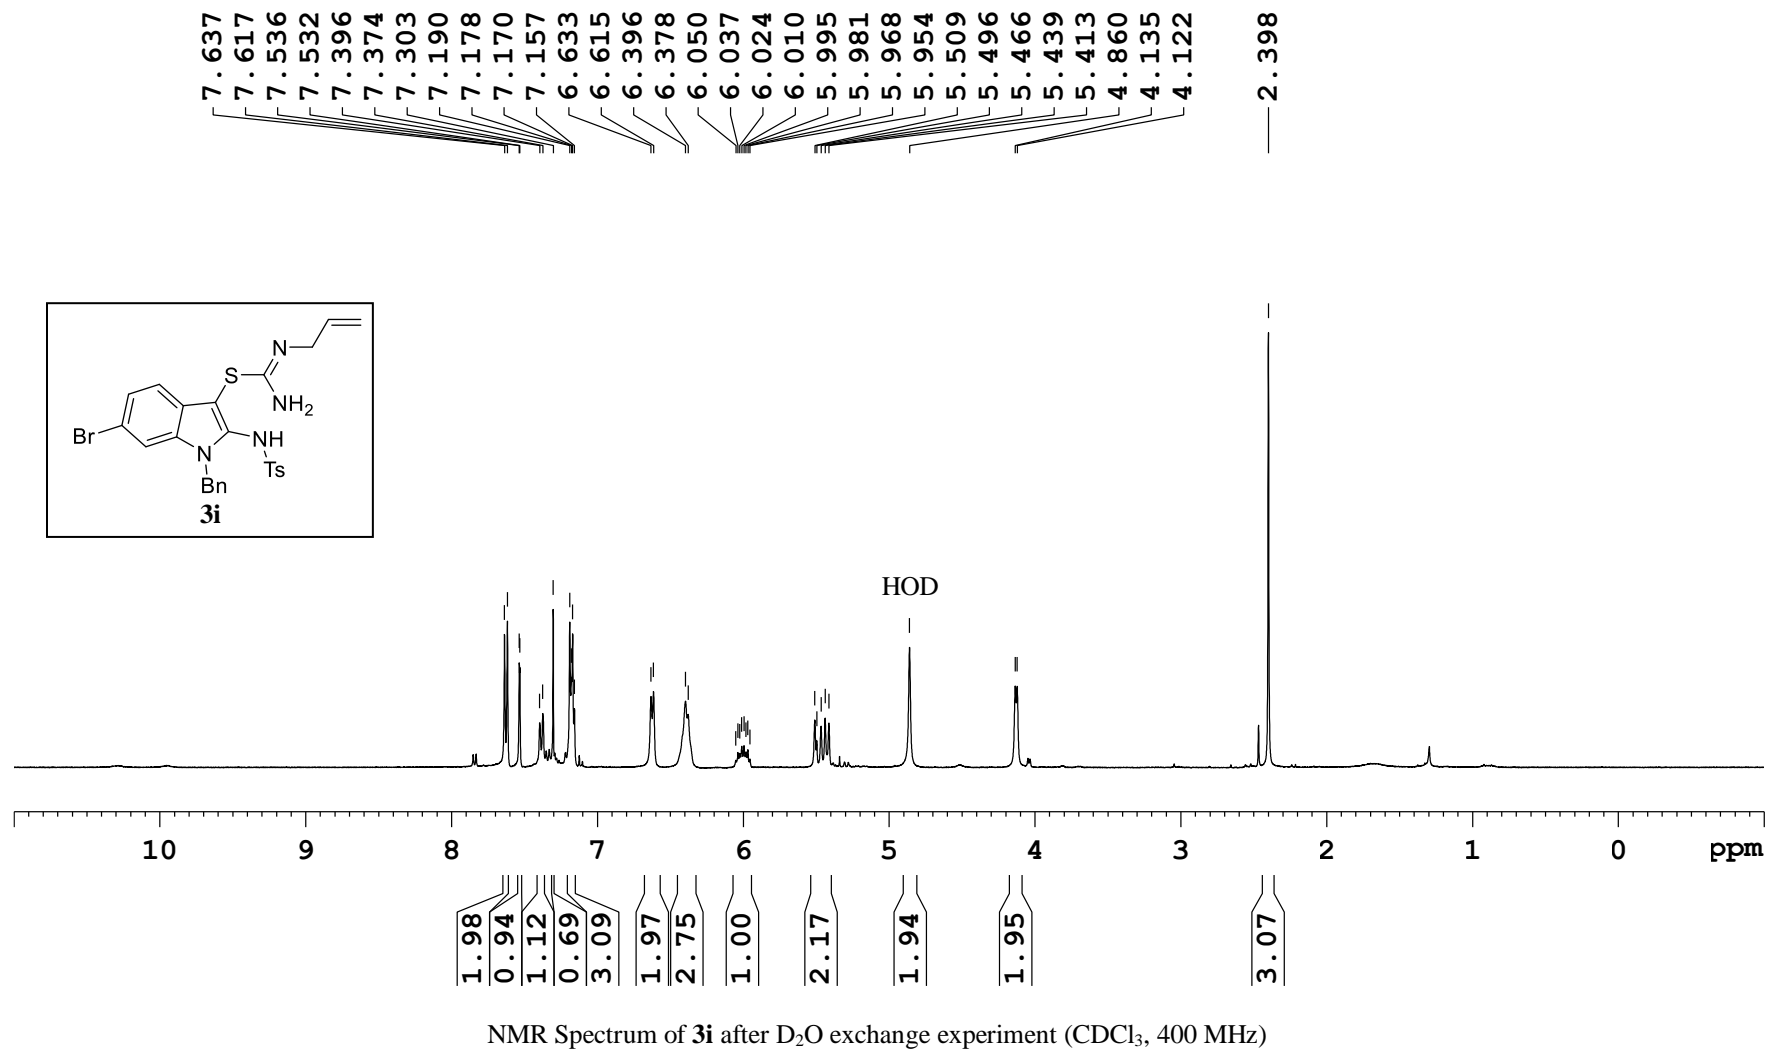

**1-Benzyl-2-[(4-methylbenzene-1-sulfonyl)amino]-5-bromo-1*H*-indol-3-yl *N*-allylcarbamidithioate (3i)**

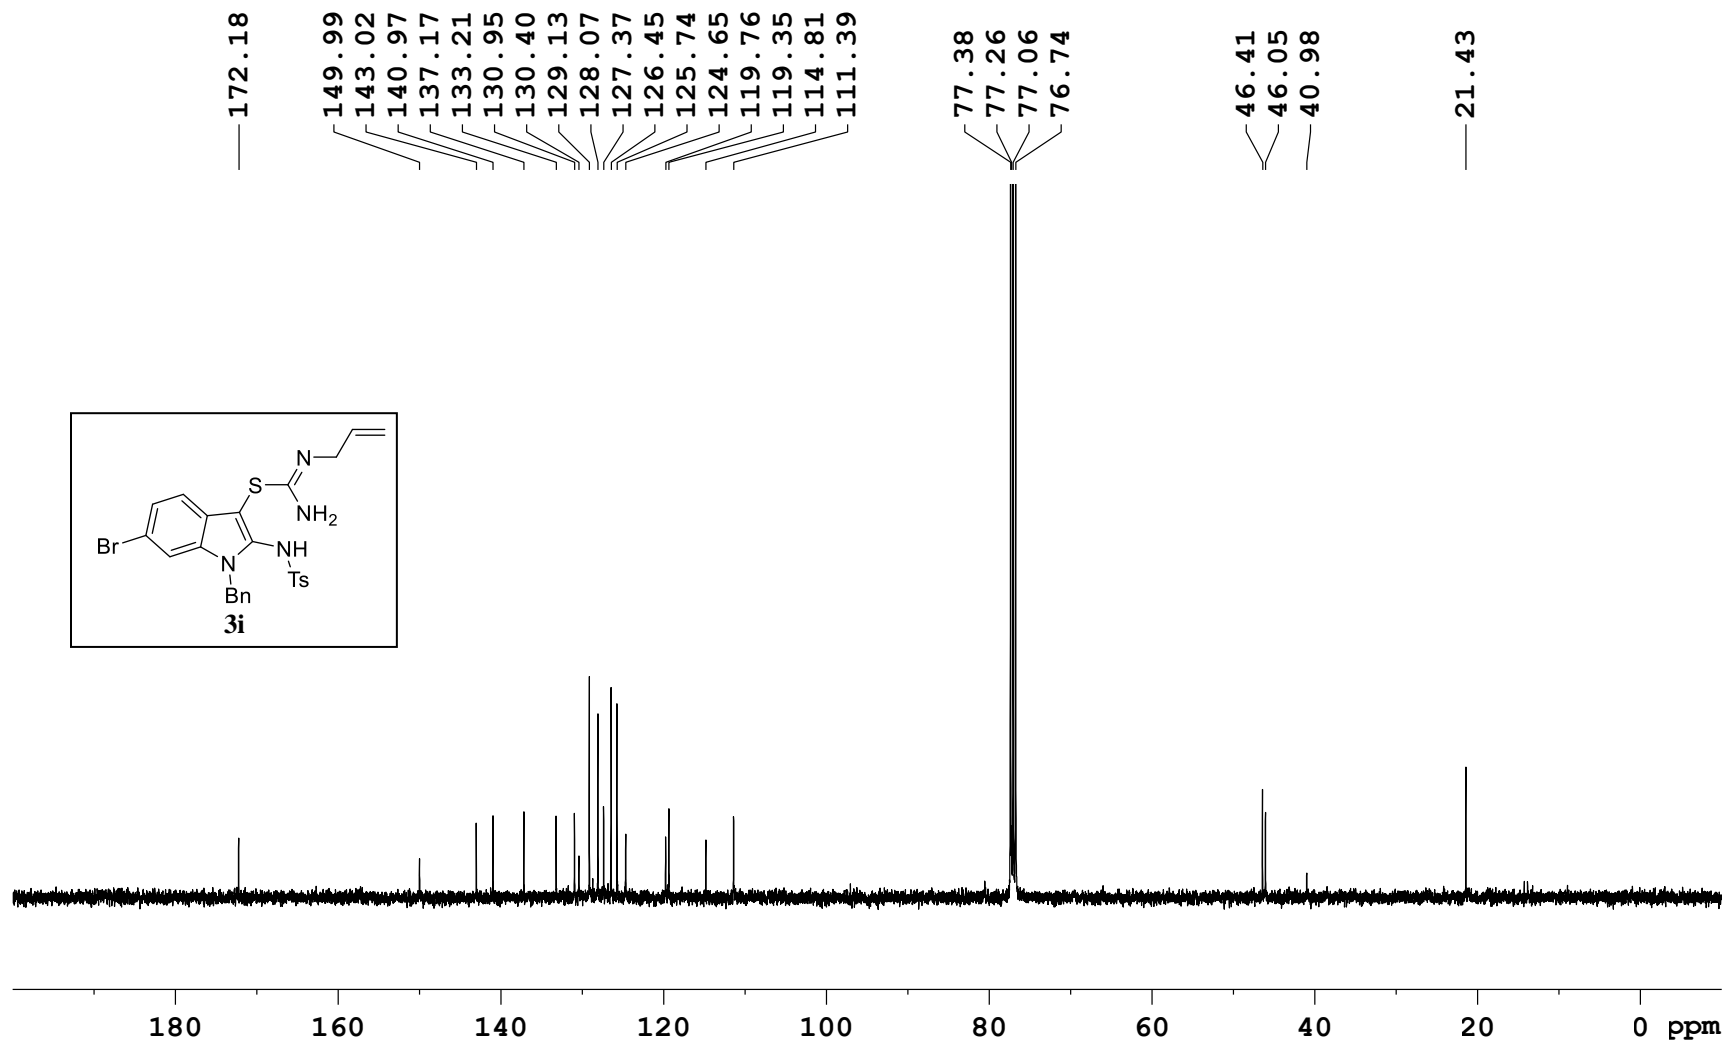

<sup>13</sup>C NMR Spectrum of **3i**

**1-Methyl-2-[(4-methylbenzene-1-sulfonyl)amino]-1*H*-indol-3-yl(2*E*)-*N*-methyl-2-[(phenyl)methylidene]hydrazine-1-carboximidothioate (6a)**

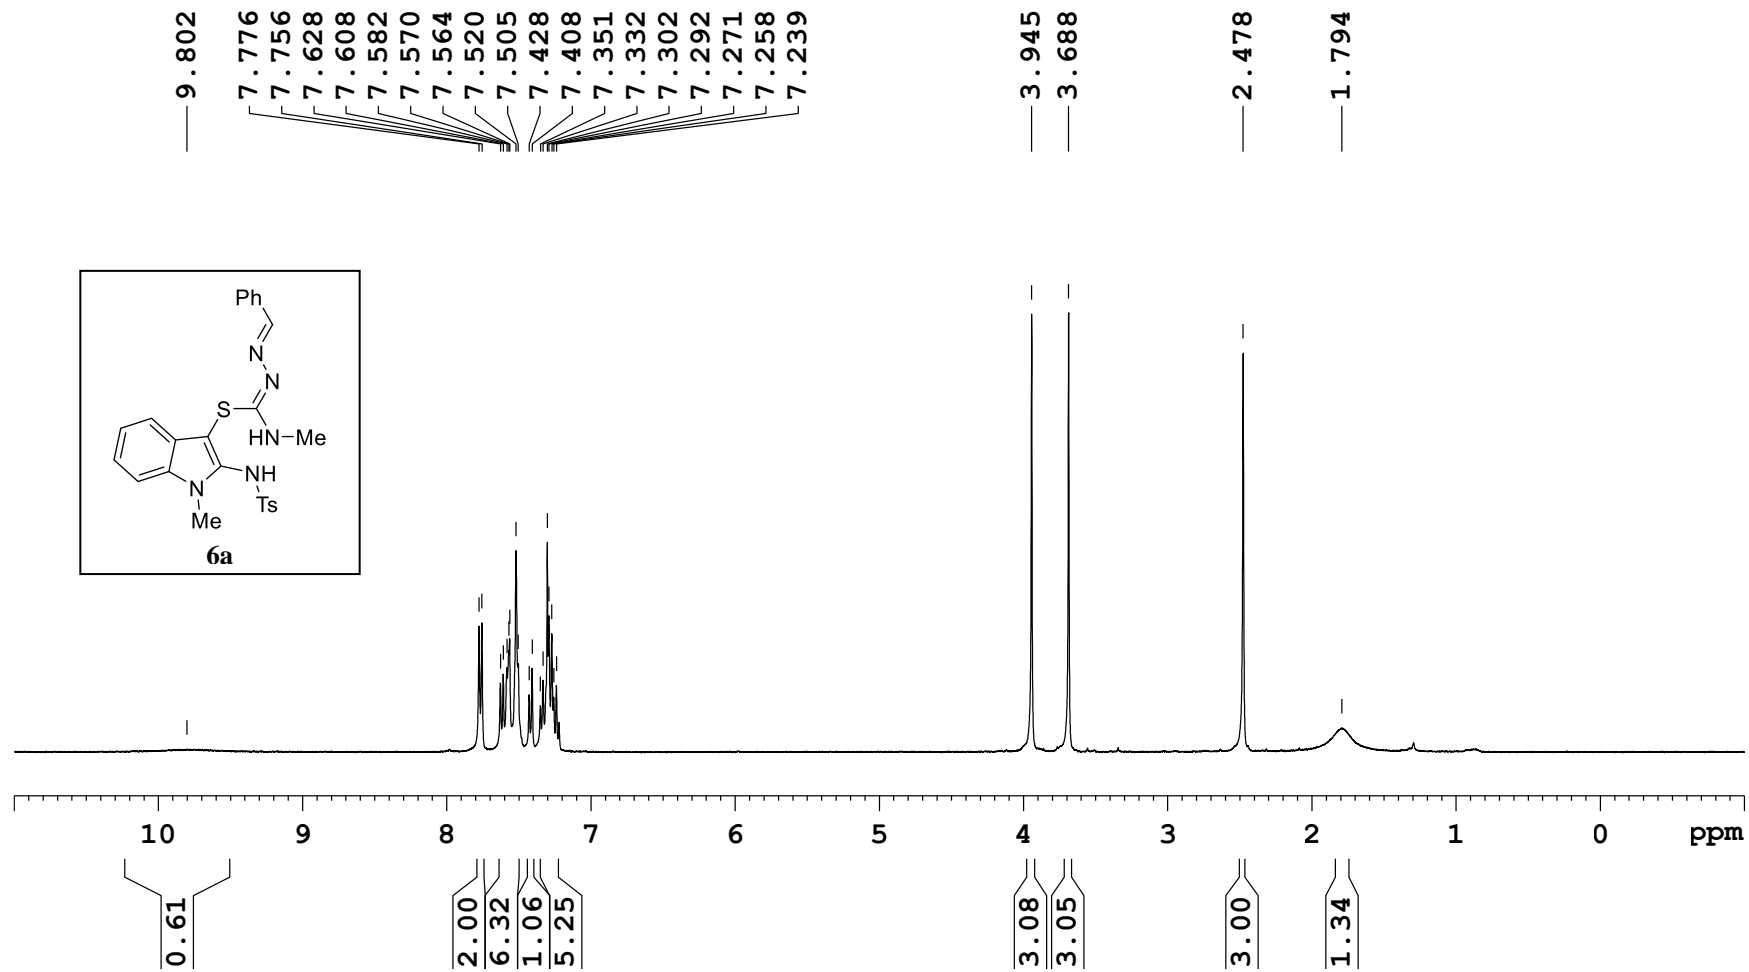

<sup>1</sup>H NMR Spectrum of **6a**

**1-Methyl-2-[(4-methylbenzene-1-sulfonyl)amino]-1*H*-indol-3-yl(2*E*)-*N*-methyl-2-[(phenyl)methylidene]hydrazine-1-carboximidothioate (6a)**

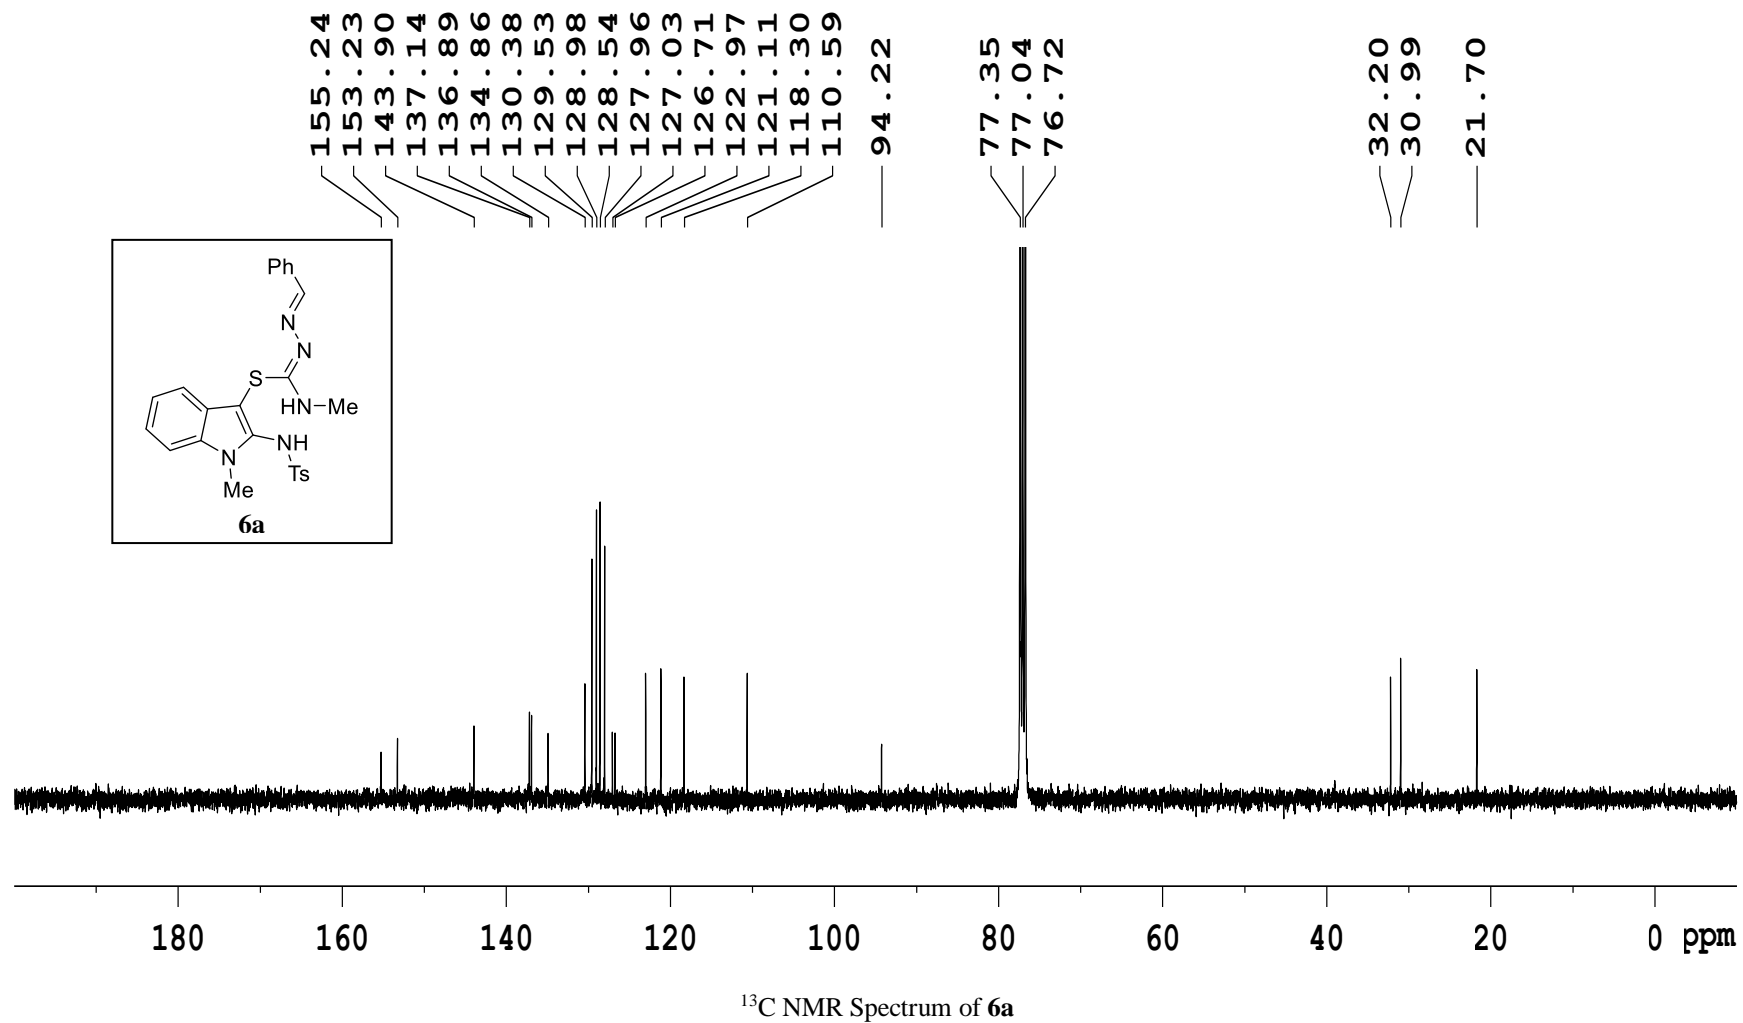

**1-Ethyl-2-[(4-methylbenzene-1-sulfonyl)amino]-1*H*-indol-3-yl(2*E*)-*N*-methyl-2-[(4-methylphenyl)methylidene]hydrazine-1-carboximidothioate (**6b**)**

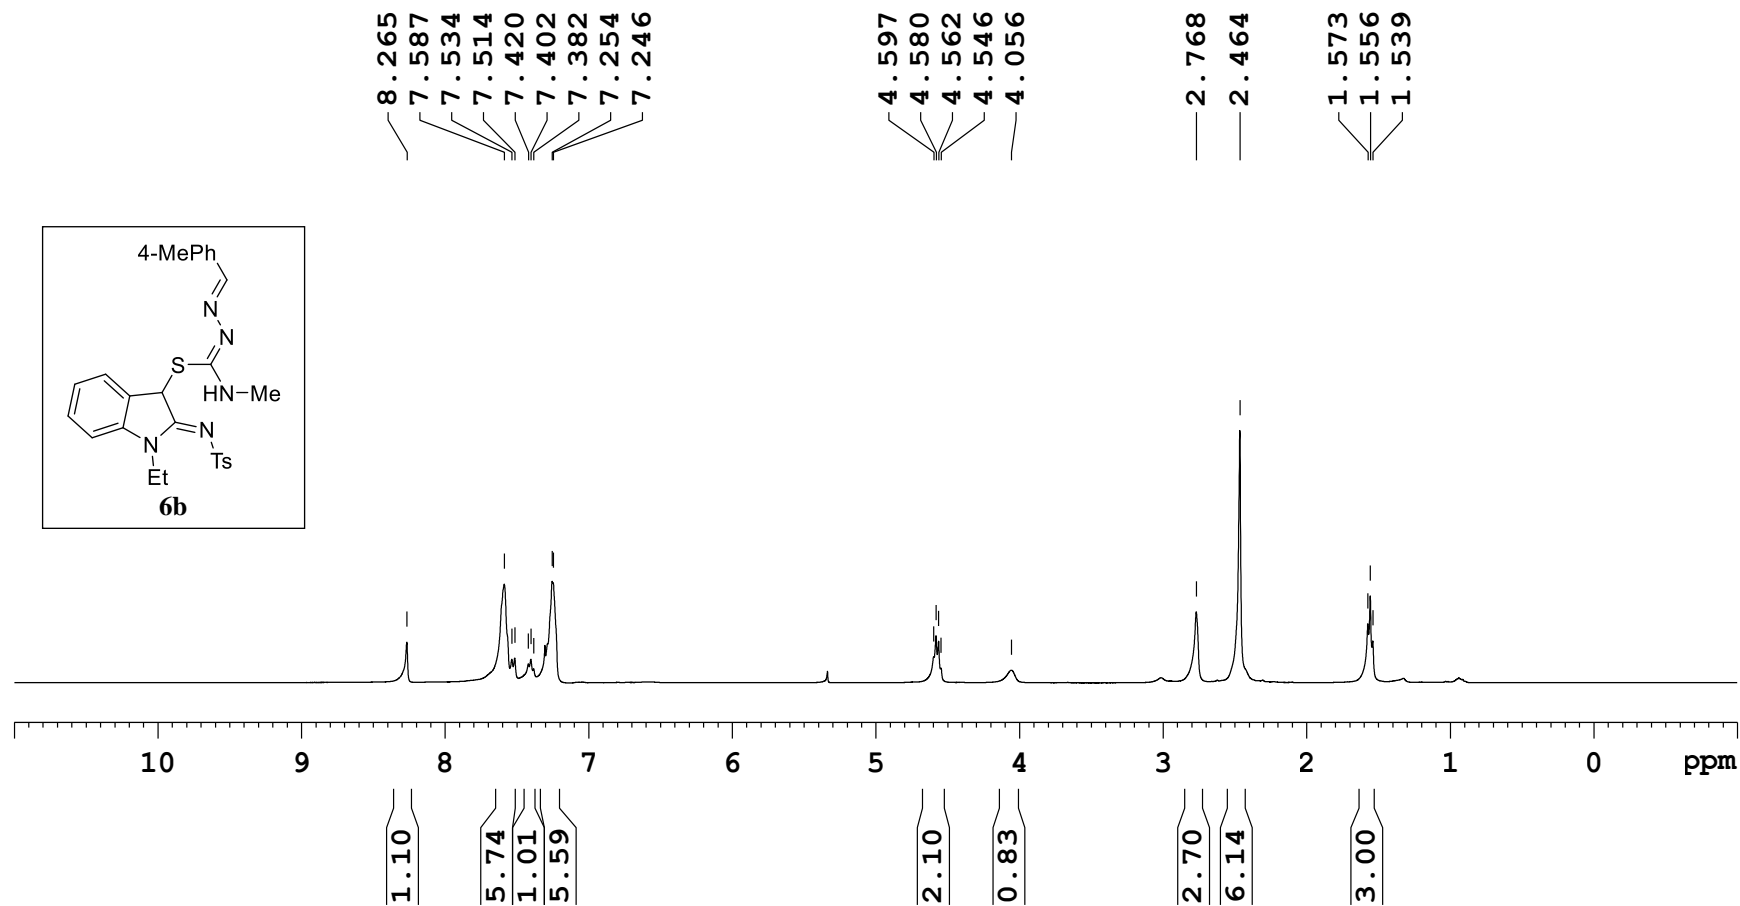

<sup>1</sup>H NMR Spectrum of **6b**

**1-Ethyl-2-[(4-methylbenzene-1-sulfonyl)amino]-1*H*-indol-3-yl(2*E*)-*N*-methyl-2-[(4-methylphenyl)methylidene]hydrazine-1-carboximidothioate (**6b**)**

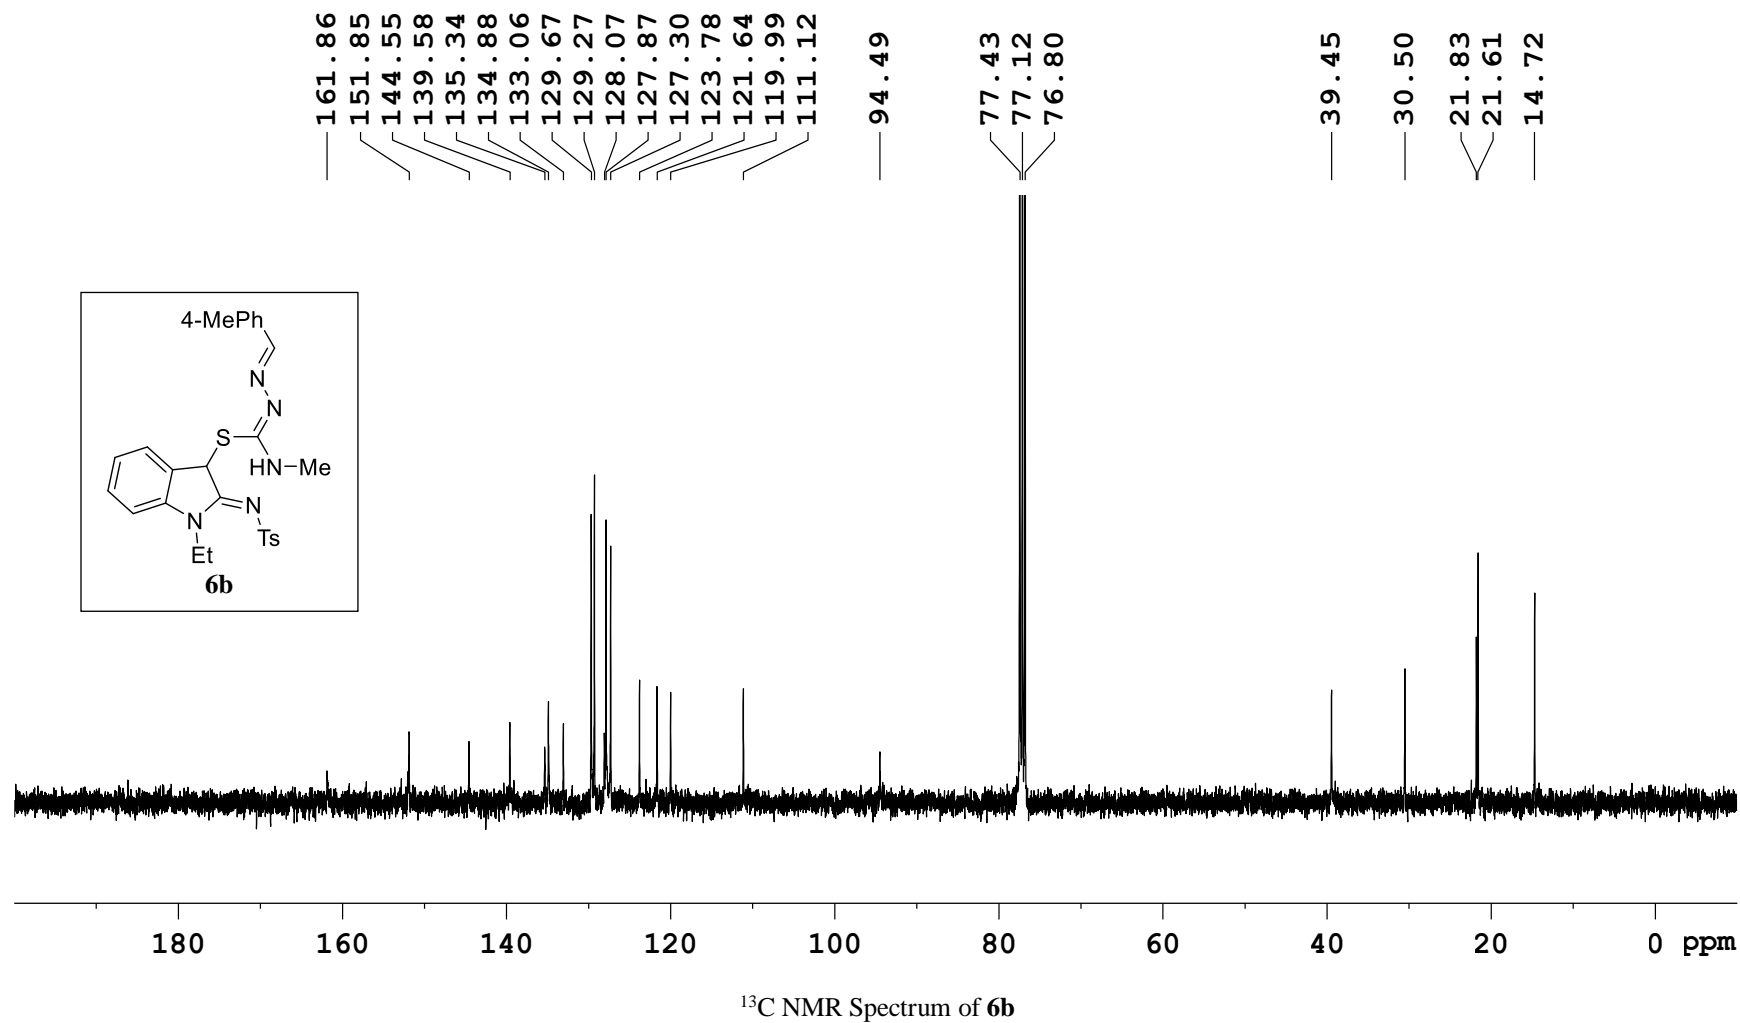

**1-Methyl-2-[(4-methylbenzene-1-sulfonyl)amino]-1*H*-indol-3-yl(2*E*)-*N*-methyl-2-[(4-methylphenyl)methylidene]hydrazine-1-carboximidothioate (**6c**)**

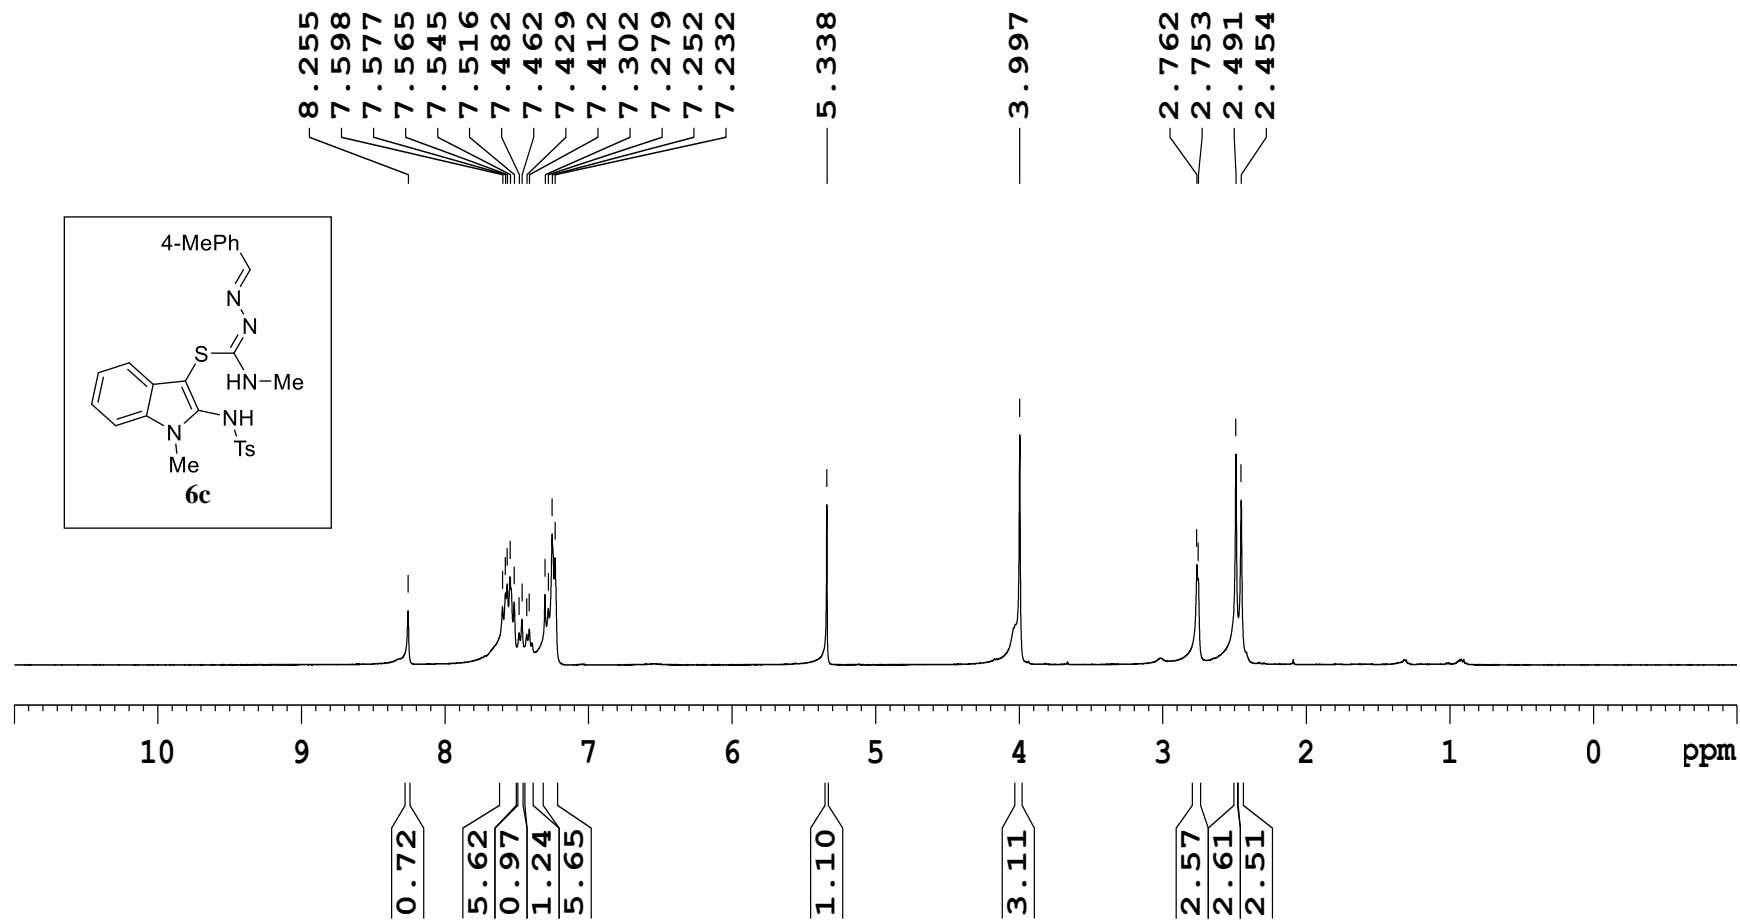

<sup>1</sup>H NMR Spectrum of **6c**

**1-Methyl-2-[(4-methylbenzene-1-sulfonyl)amino]-1*H*-indol-3-yl(2*E*)-*N*-methyl-2-[(4-methylphenyl)methylidene]hydrazine-1-carboximidothioate (**6c**)**

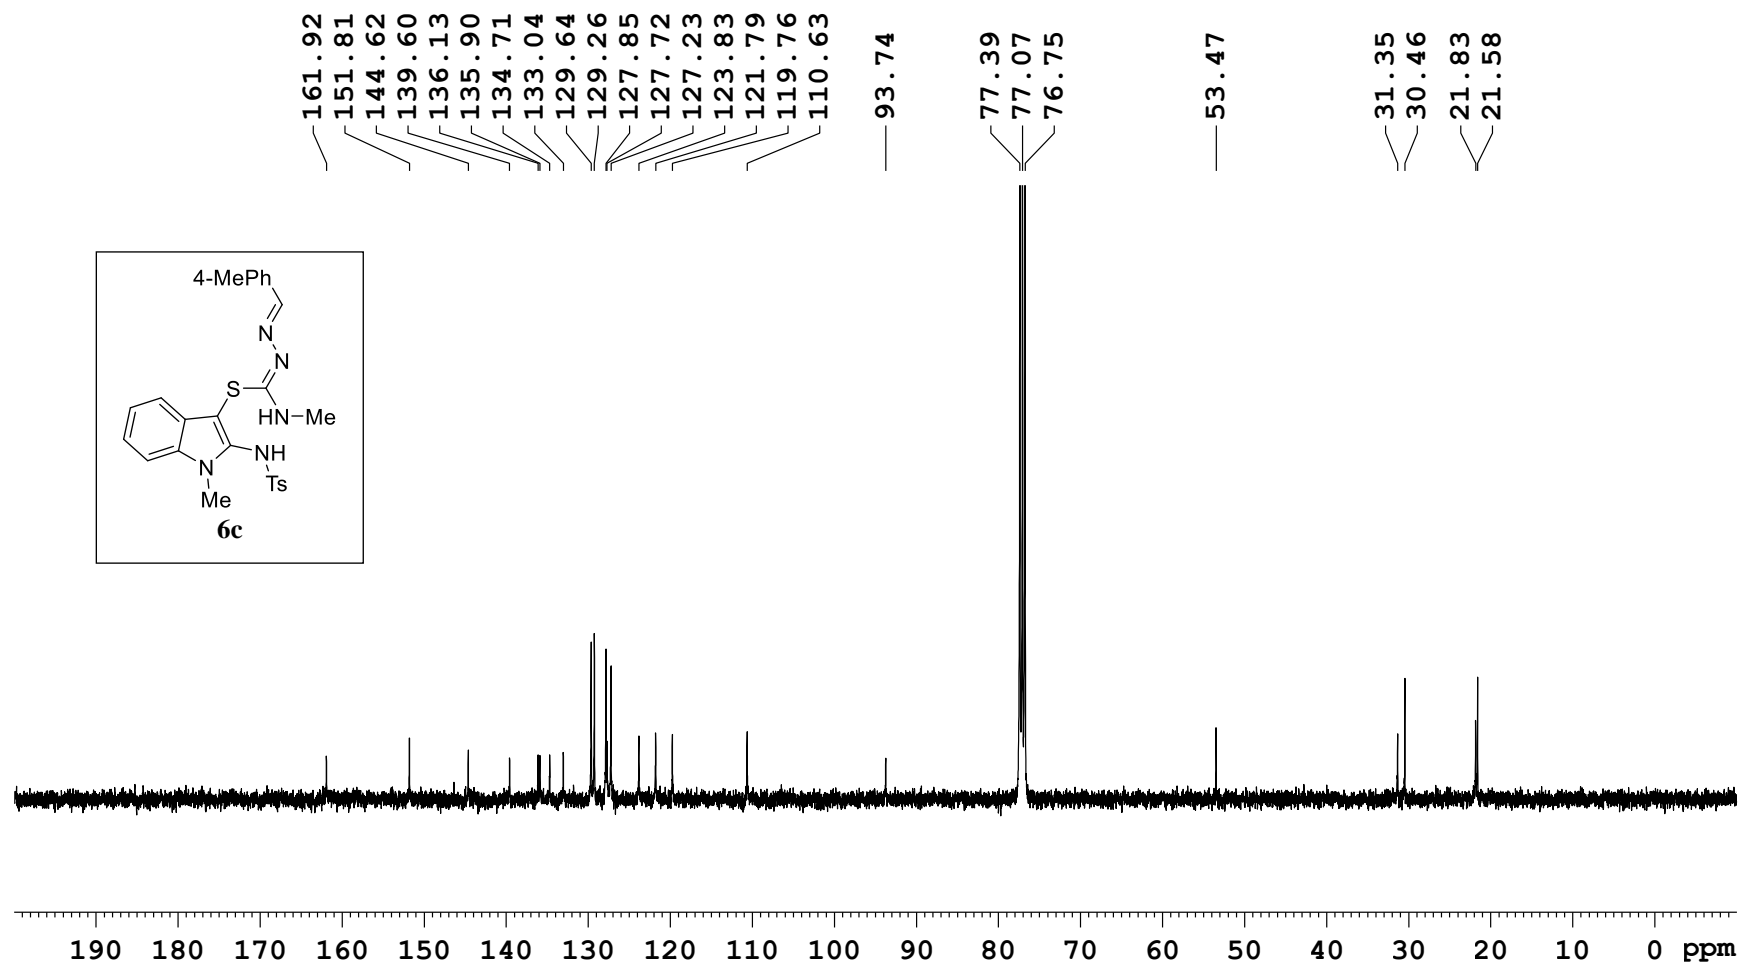

<sup>13</sup>C NMR Spectrum of **6c**



**1-Allyl-2-[(4-methylbenzene-1-sulfonyl)amino]-1*H*-indol-3-yl(2*E*)-*N*-methyl-2-[(4-methylphenyl)methylidene]hydrazine-1-carboximidothioate (**6d**)**

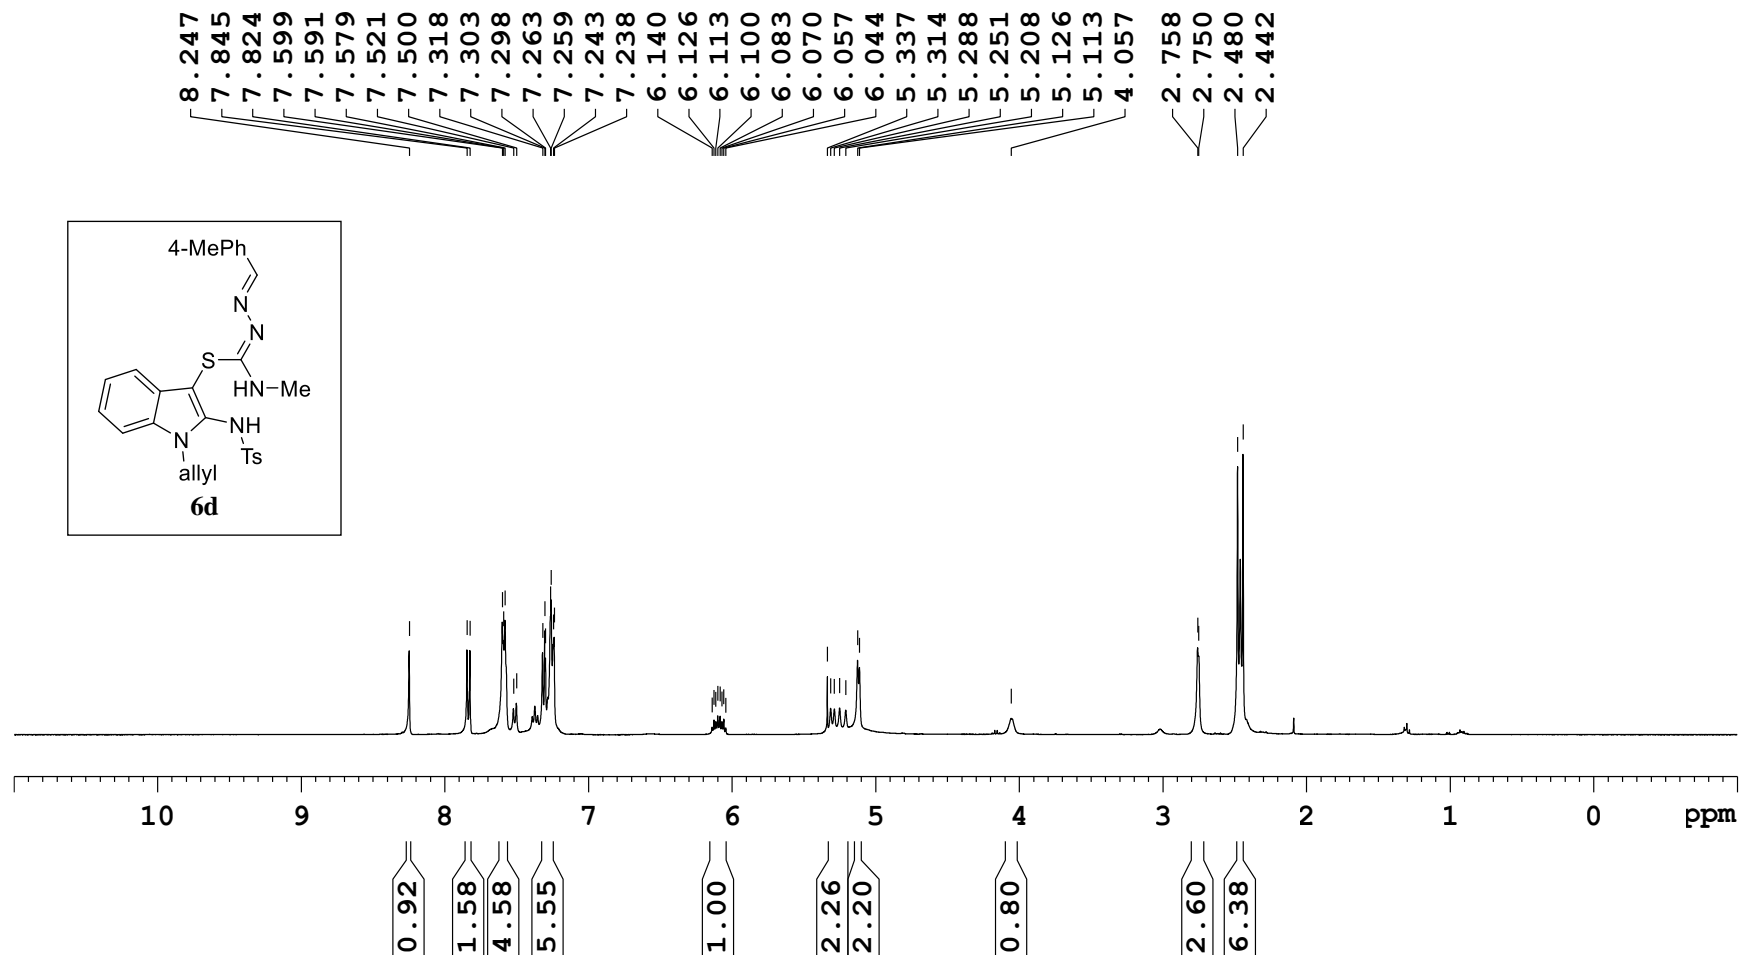

**1-Allyl-2-[(4-methylbenzene-1-sulfonyl)amino]-1*H*-indol-3-yl(2*E*)-*N*-methyl-2-[(4-methylphenyl)methylidene]hydrazine-1-carboximidothioate (6d)**

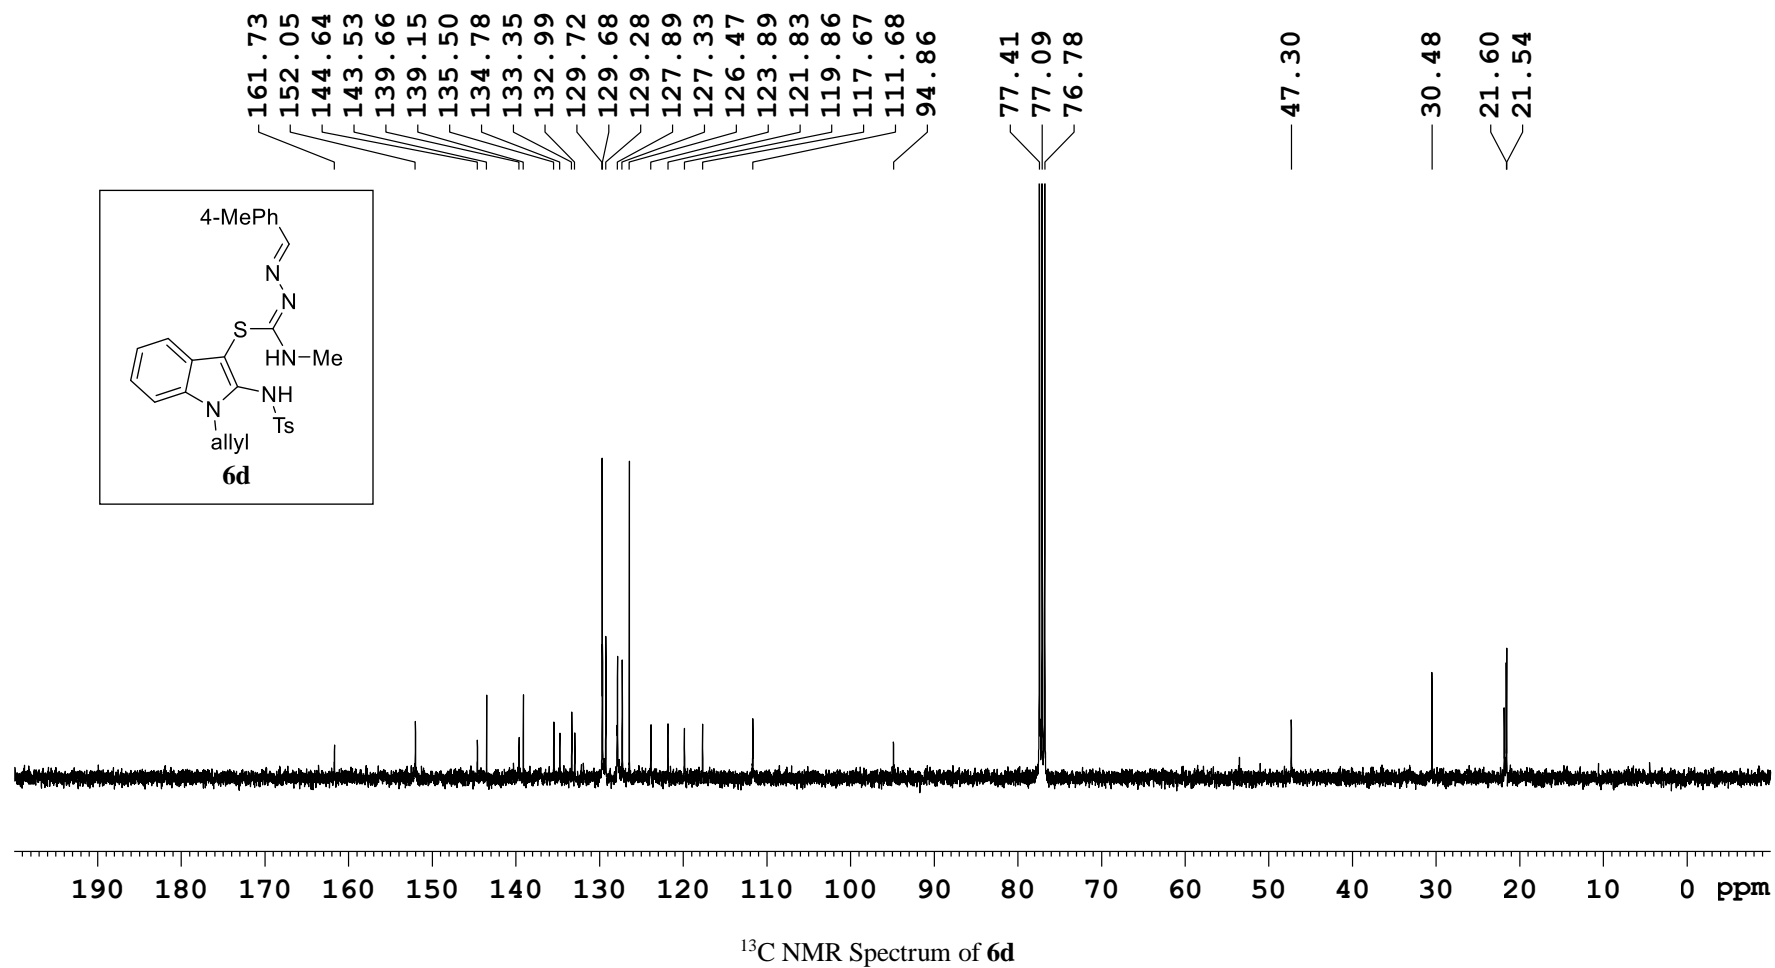

**1-Benzyl-2-[(4-methylbenzene-1-sulfonyl)amino]-1H-indol-3-yl(2E)-N-methyl-2-[(4-methylphenyl)methylidene]hydrazine-1-carboximidothioate (6e)**

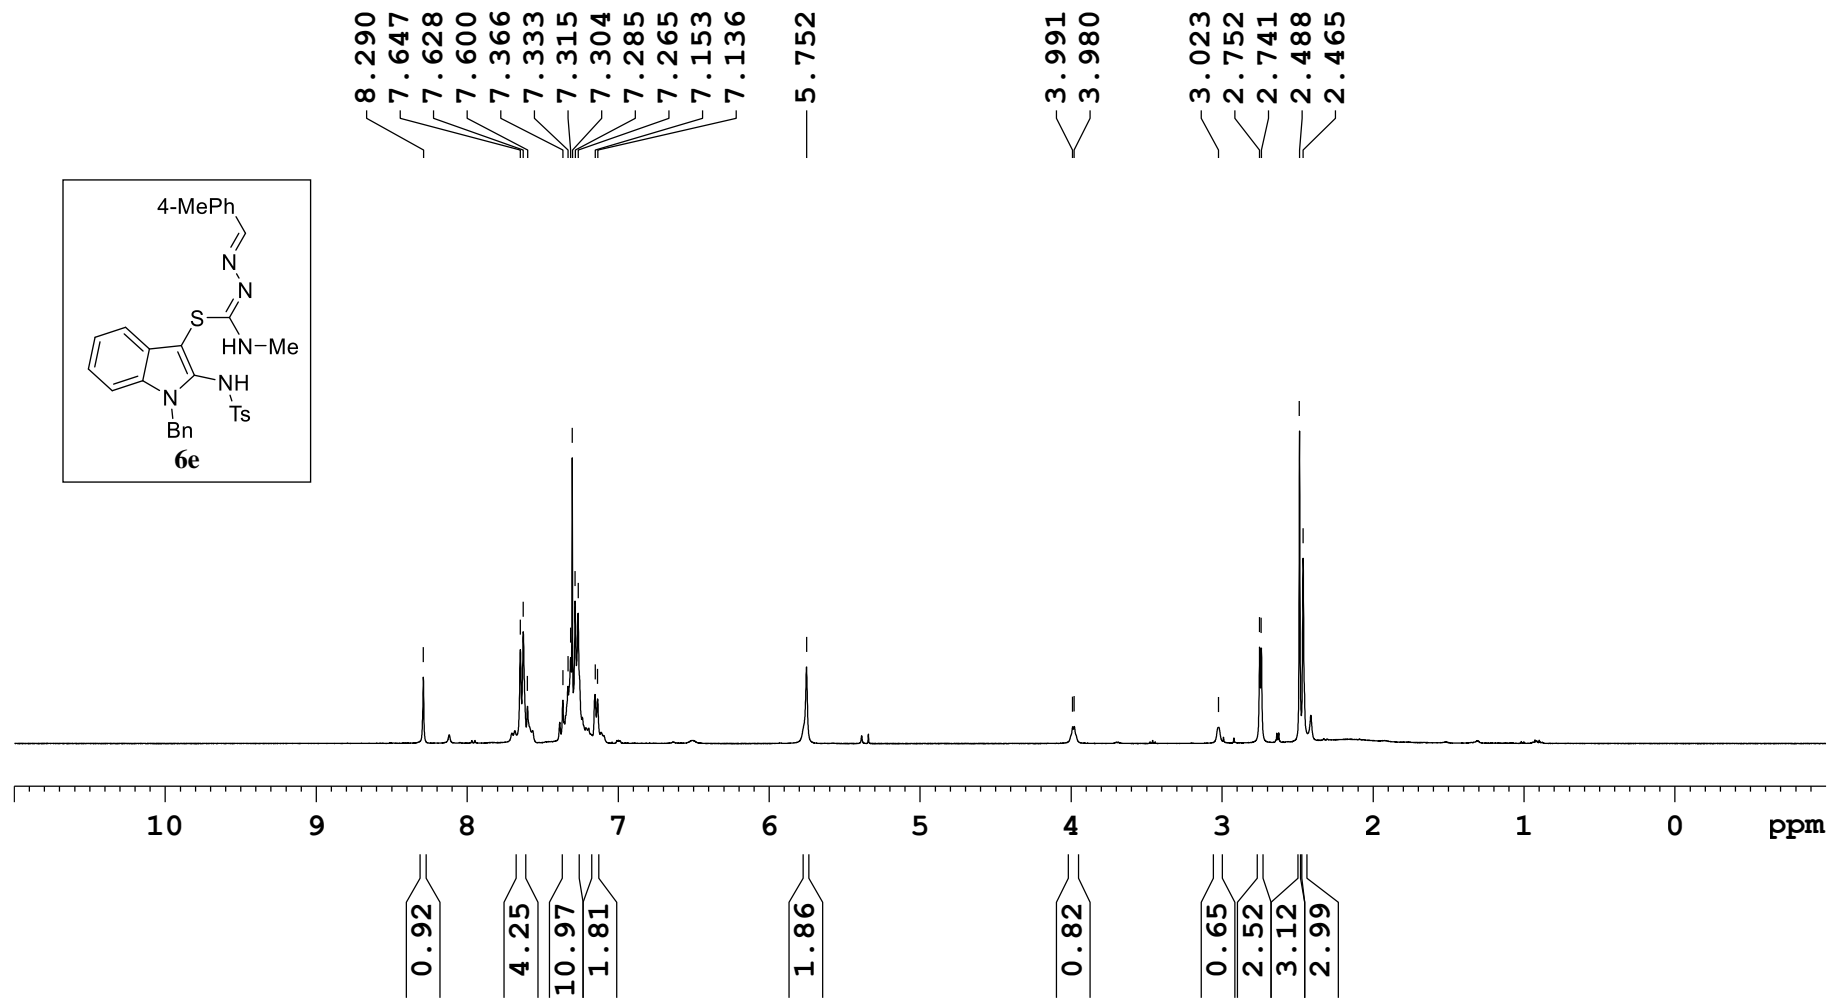

<sup>1</sup>H NMR Spectrum of **6e**

**1-Benzyl-2-[(4-methylbenzene-1-sulfonyl)amino]-1H-indol-3-yl(2E)-N-methyl-2-[(4-methylphenyl)methylidene]hydrazine-1-carboximidothioate (6e)**

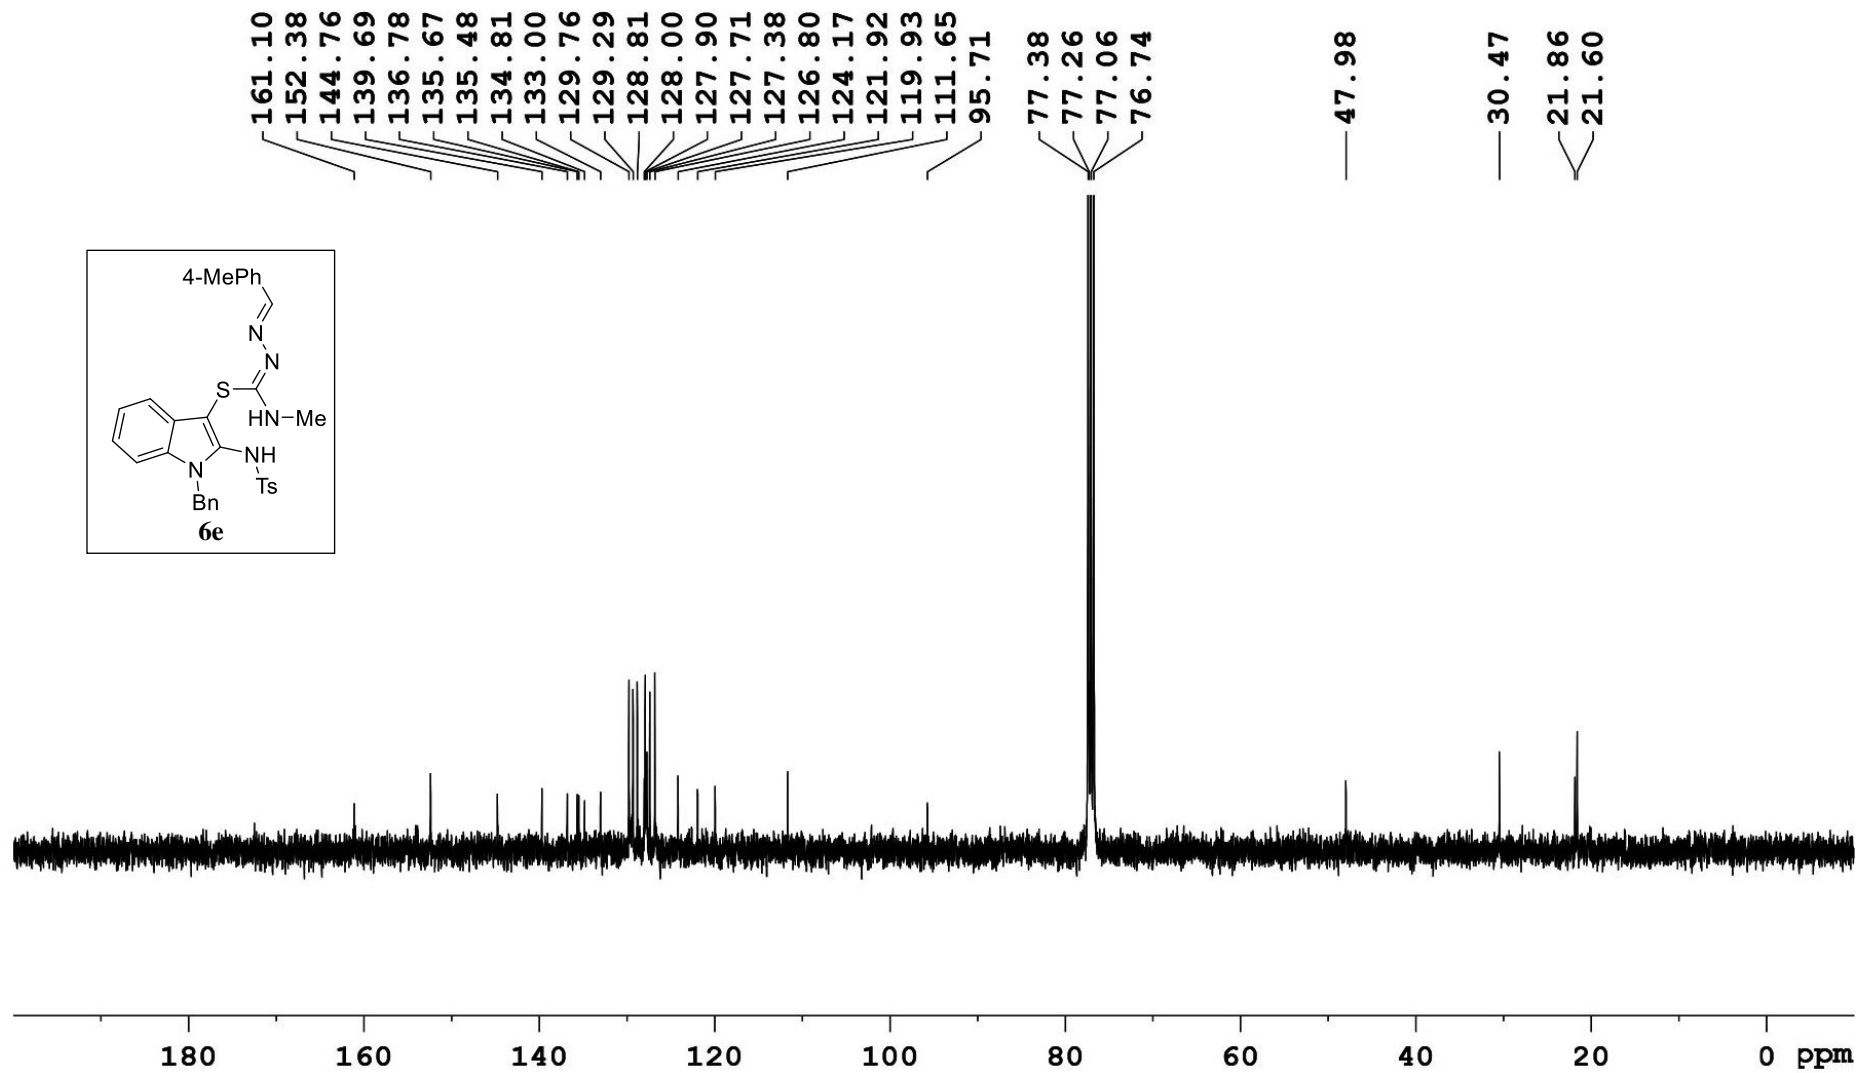

<sup>13</sup>C NMR Spectrum of **6e**

**1-Ethyl-2-[(4-methylbenzene-1-sulfonyl)amino]-5-methoxy-1*H*-indol-3-yl(2*E*)-*N*-methyl-2-[(3,4,5-trimethoxyphenyl)methylidene]hydrazine-1-carboximidothioate (6f)**

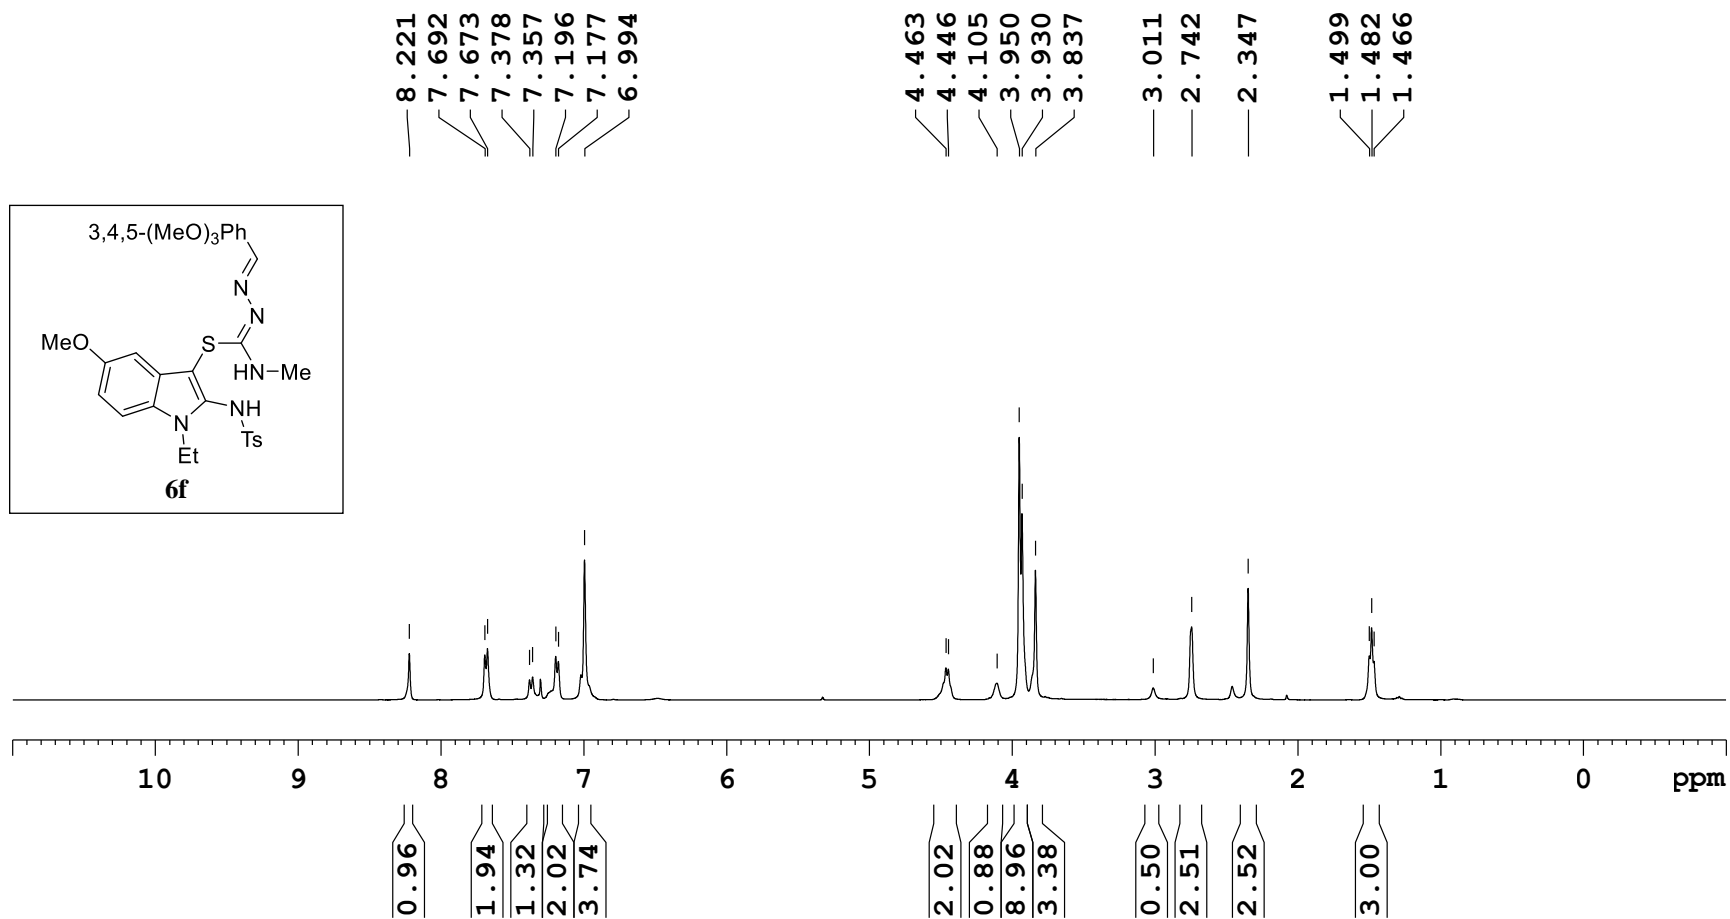

<sup>1</sup>H NMR Spectrum of **6f**

**1-Ethyl-2-[(4-methylbenzene-1-sulfonyl)amino]-5-methoxy-1*H*-indol-3-yl(2*E*)-*N*-methyl-2-[(3,4,5-trimethoxyphenyl)methylidene]hydrazine-1-carboximidothioate (**6f**)**

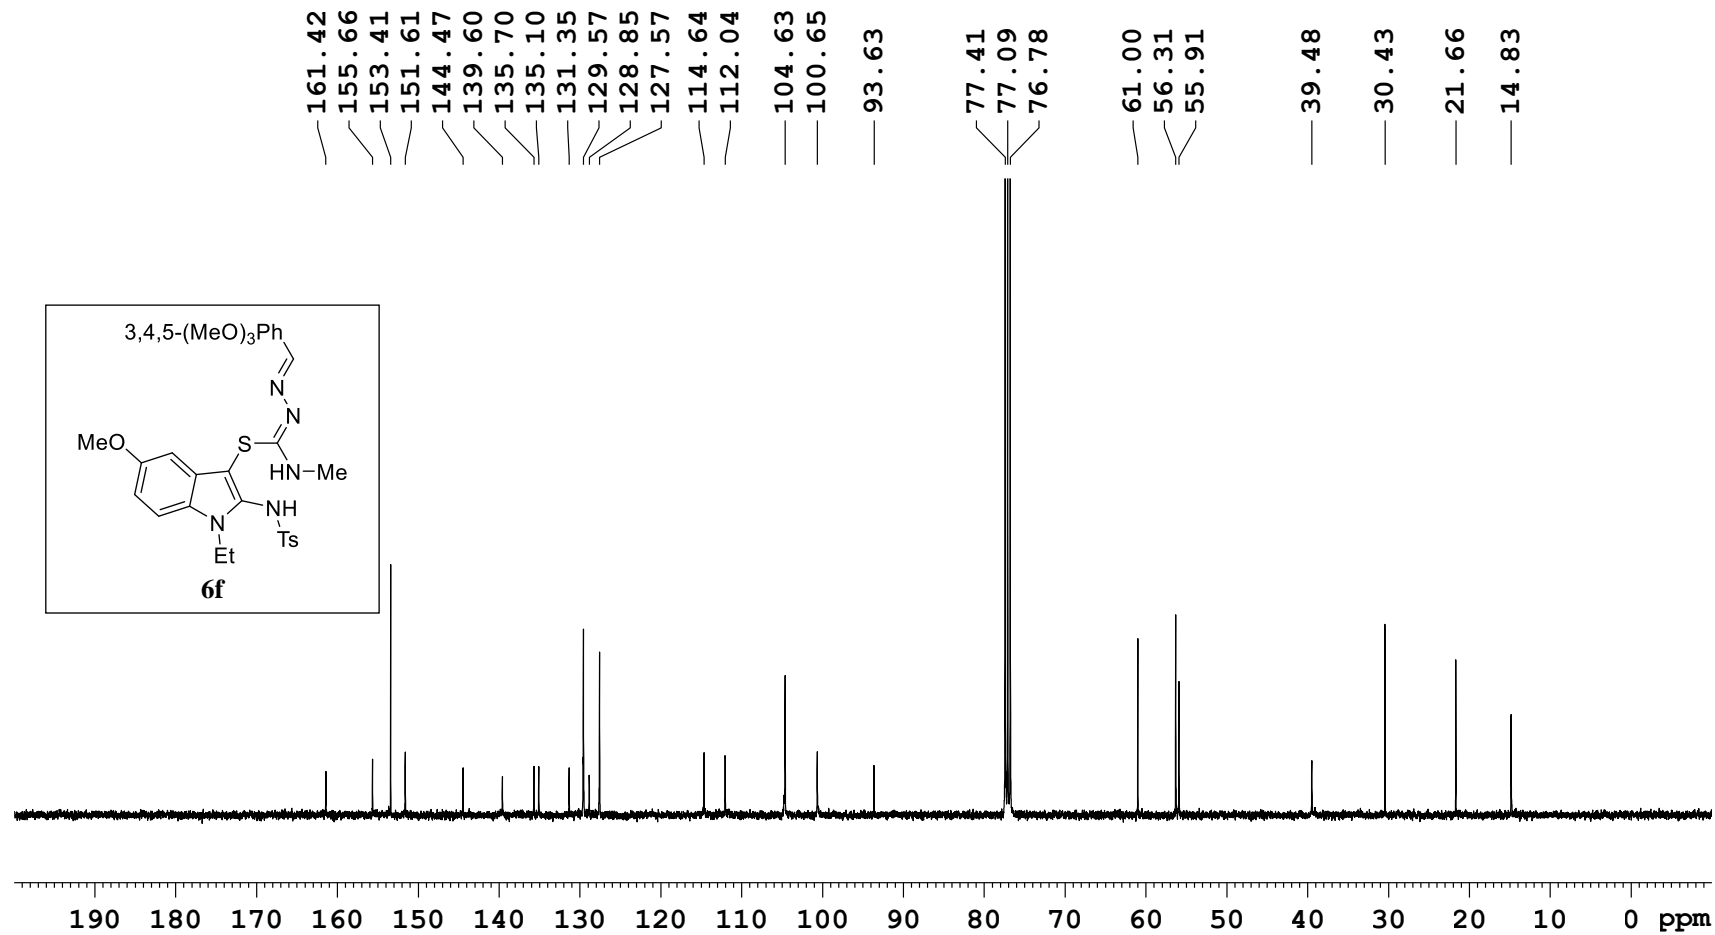

<sup>13</sup>C NMR Spectrum of **6f**

**1-Ethyl-2-[(4-methylbenzene-1-sulfonyl)amino]-5-methoxy-1*H*-indol-3-yl(2*E*)-*N*-methyl-2-(1-naphthalenyl)methylidene]hydrazine-1-carboximidothioate (**6g**)**

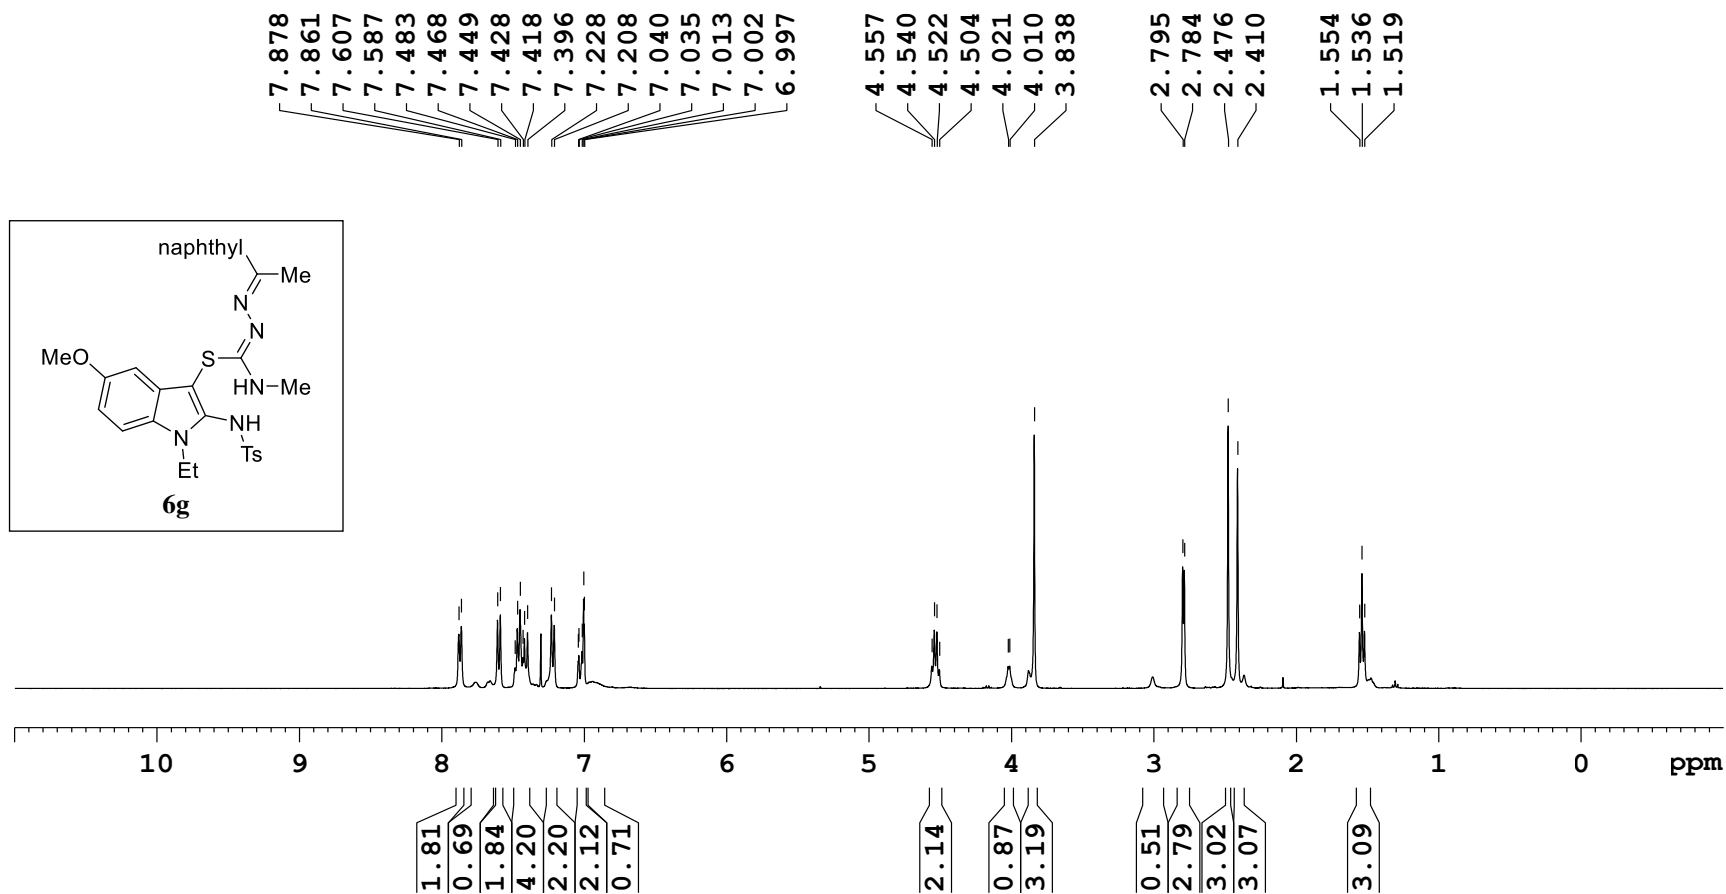

<sup>1</sup>H NMR Spectrum of **6g**

**1-Ethyl-2-[(4-methylbenzene-1-sulfonyl)amino]-5-methoxy-1*H*-indol-3-yl(2*E*)-*N*-methyl-2-(1-(naphthalenyl)methylidene)hydrazine-1-carboximidothioate (6g)**

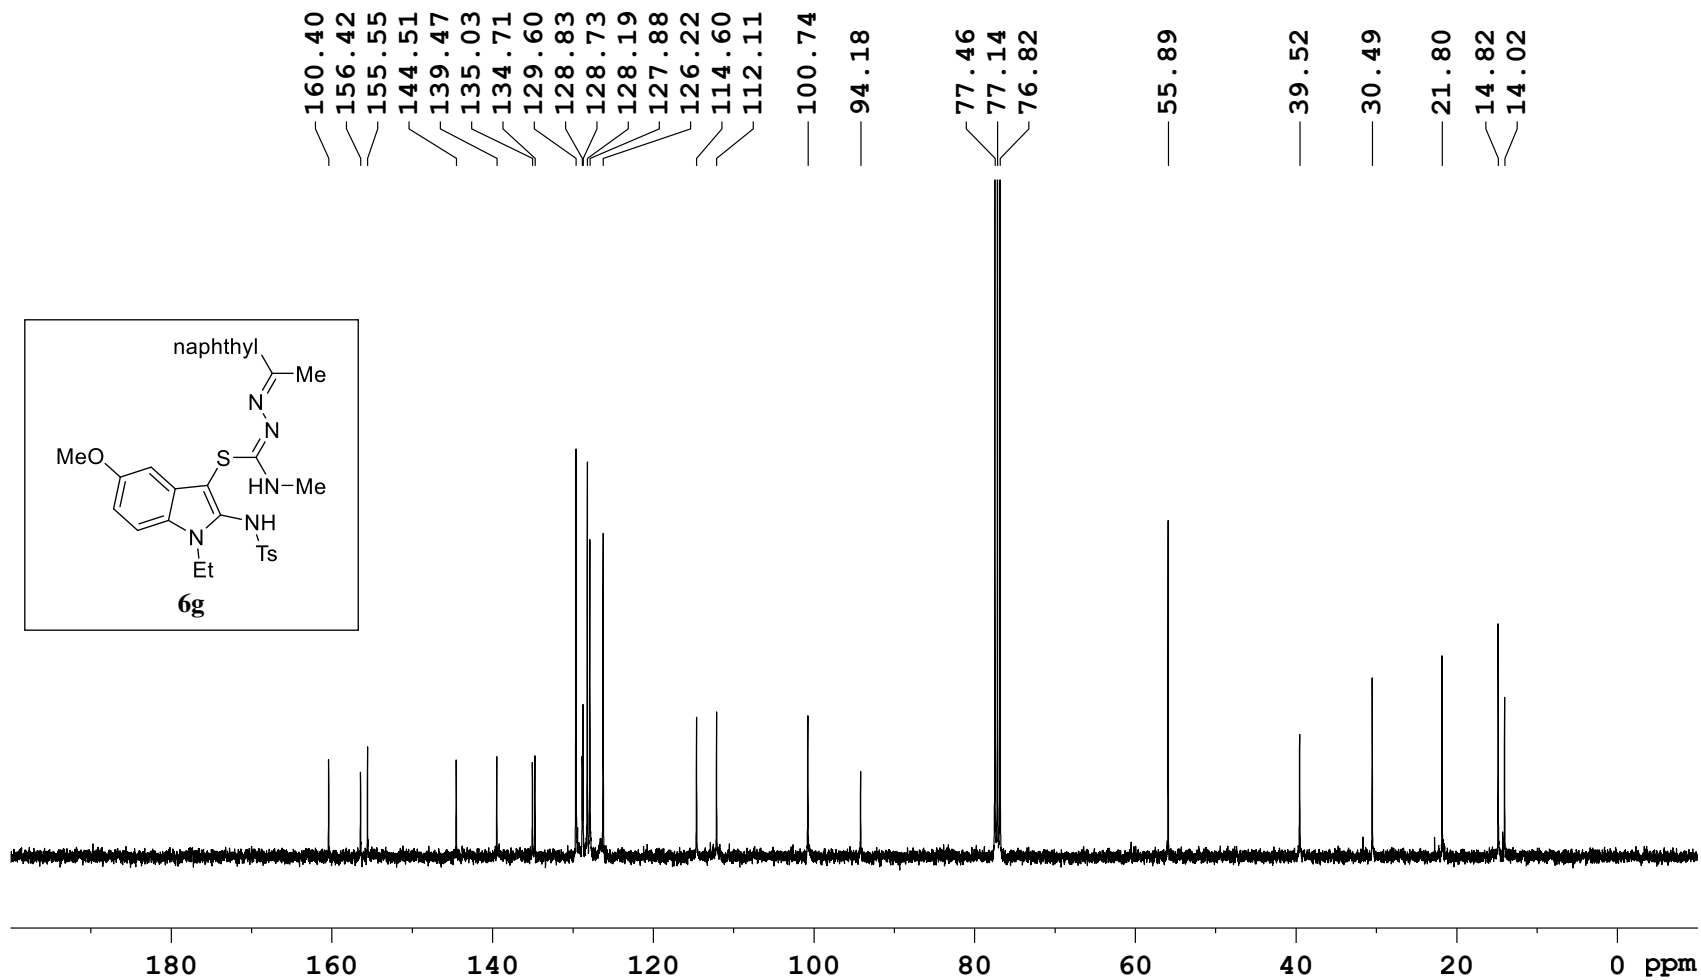

<sup>13</sup>C NMR Spectrum of **6g**



**1-Methyl-2-[(4-methylbenzene-1-sulfonyl)amino]-1*H*-indol-3-yl-*N*-methyl-2-[(di-*p*-Chlorophenyl)methylidene]hydrazine-1-carboximidothioate (**6h**)**

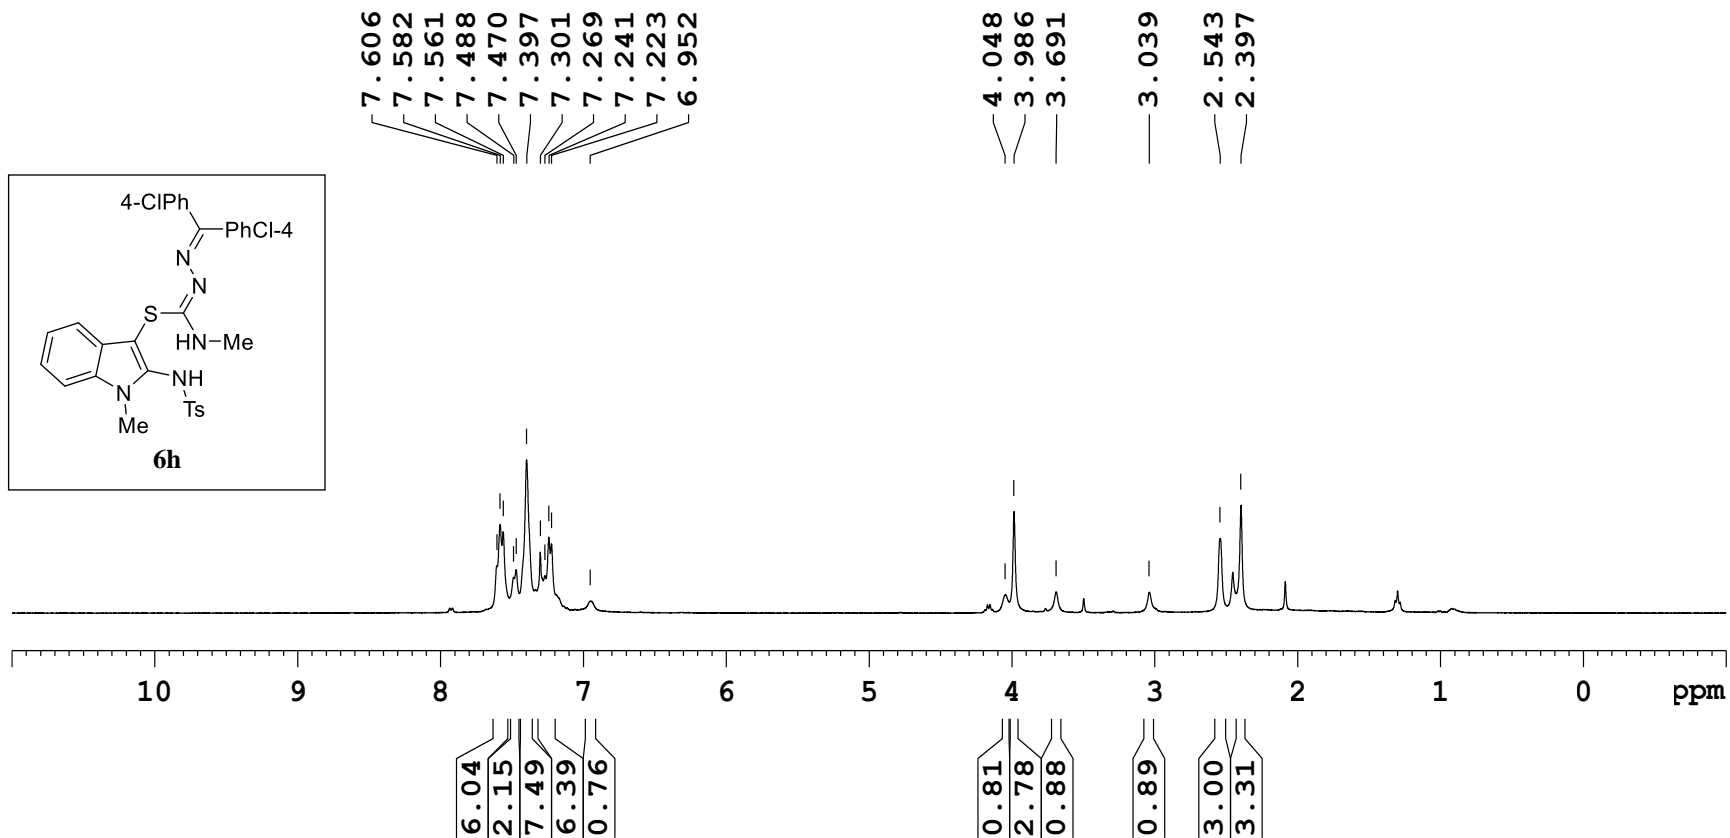

<sup>1</sup>H NMR Spectrum of **6h**

**1-Methyl-2-[(4-methylbenzene-1-sulfonyl)amino]-1*H*-indol-3-yl-*N*-methyl-2-[(di-*p*-chlorophenyl)methylidene]hydrazine-1-carboximidothioate (**6h**)**

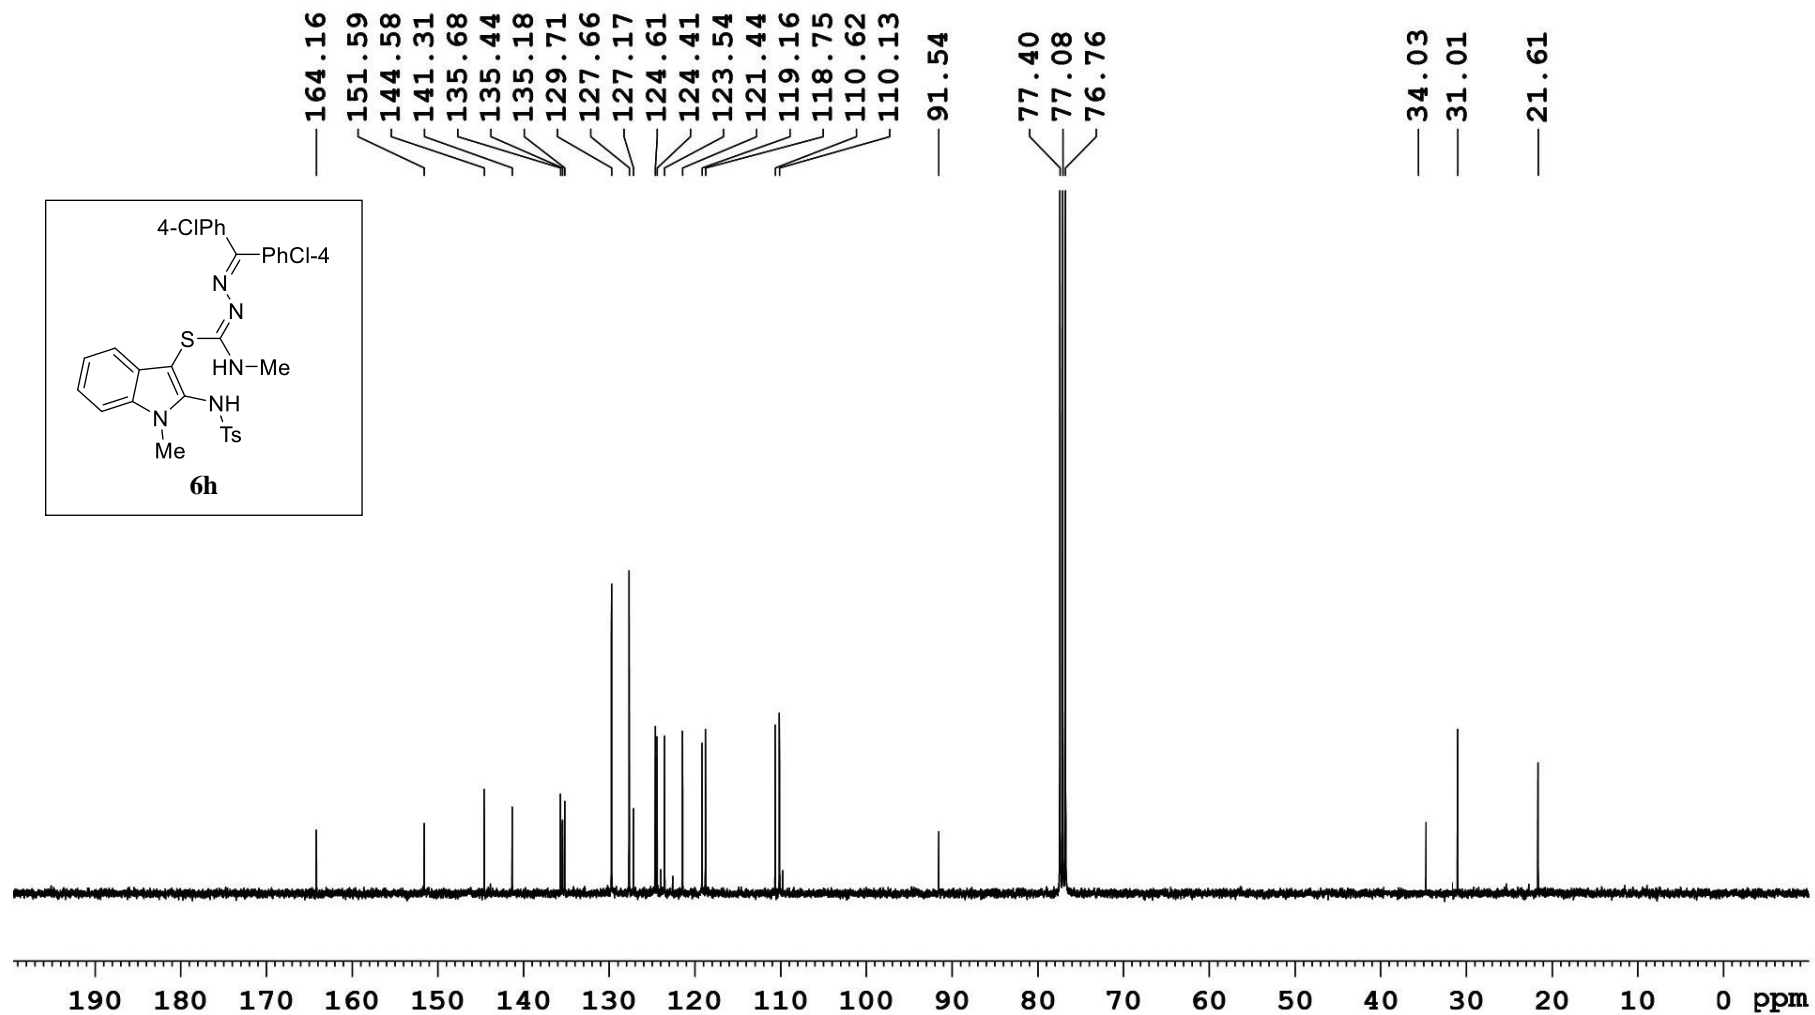

<sup>13</sup>C NMR Spectrum of **6h**

**1-Benzyl-2-[(4-methylbenzene-1-sulfonyl)amino]-1*H*-indol-3-yl-*N*-phenyl-2-[(di-*p*-tolyl)methylidene]hydrazine-1-carboximidothioate (**6i**)**

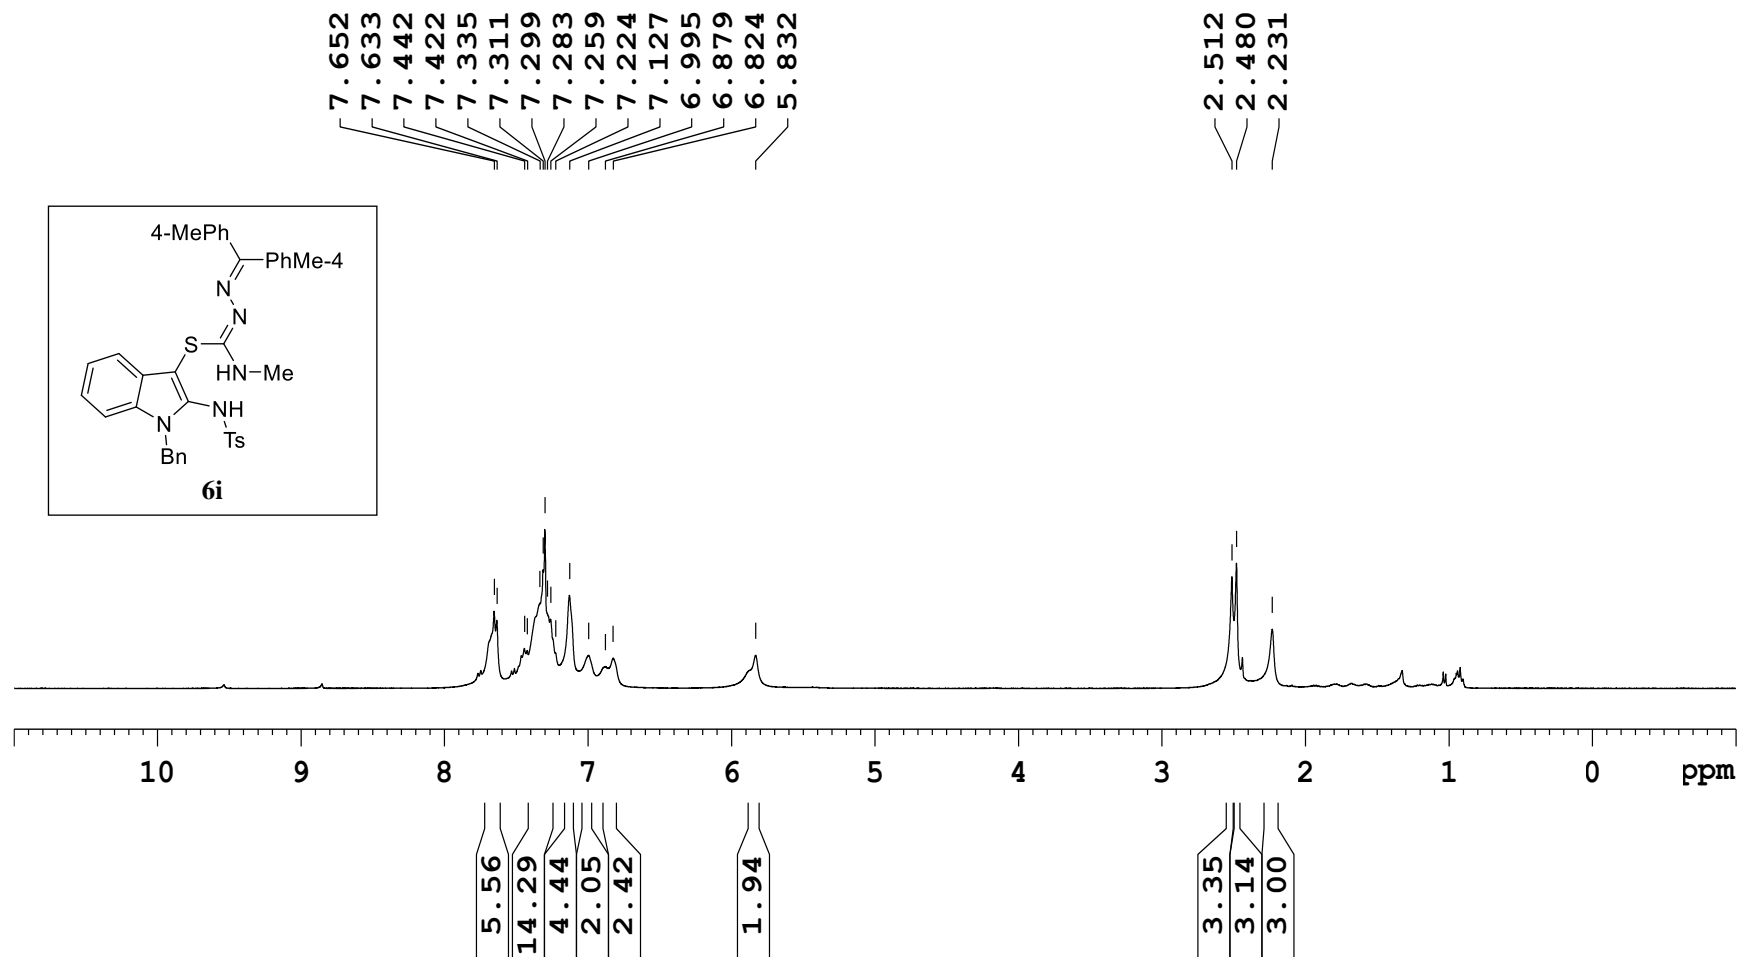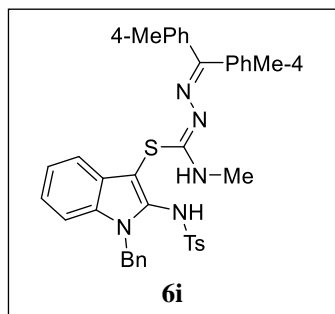

<sup>1</sup>H NMR Spectrum of **6i**

**1-Benzyl-2-[(4-methylbenzene-1-sulfonyl)amino]-1H-indol-3-yl-N-phenyl-2-[(di-*p*-tolyl)methylidene]hydrazine-1-carboximidothioate (**6i**)**

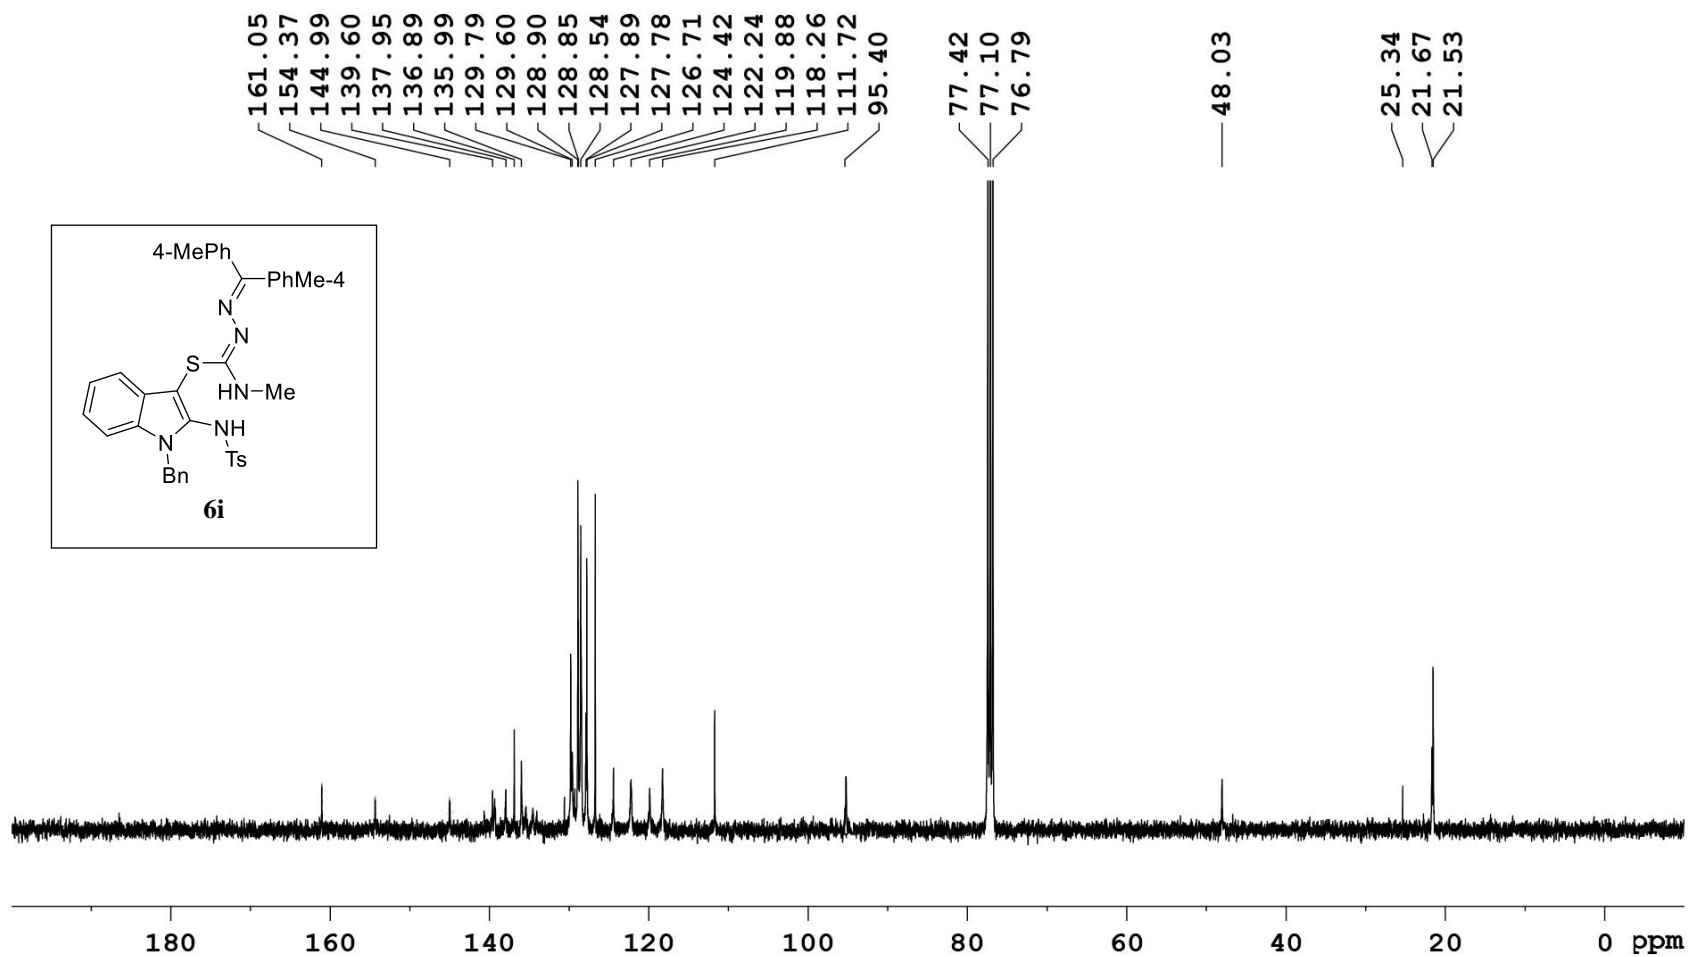

<sup>13</sup>C NMR Spectrum of **6i**

**1-Allyl-2-[(4-methylbenzene-1-sulfonyl)amino]-1H-indol-3-yl(2E)-2[(1-benzyl-2-oxoindolin-3-ylidene)]hydrazine-1-carboximidothioate (6j)**

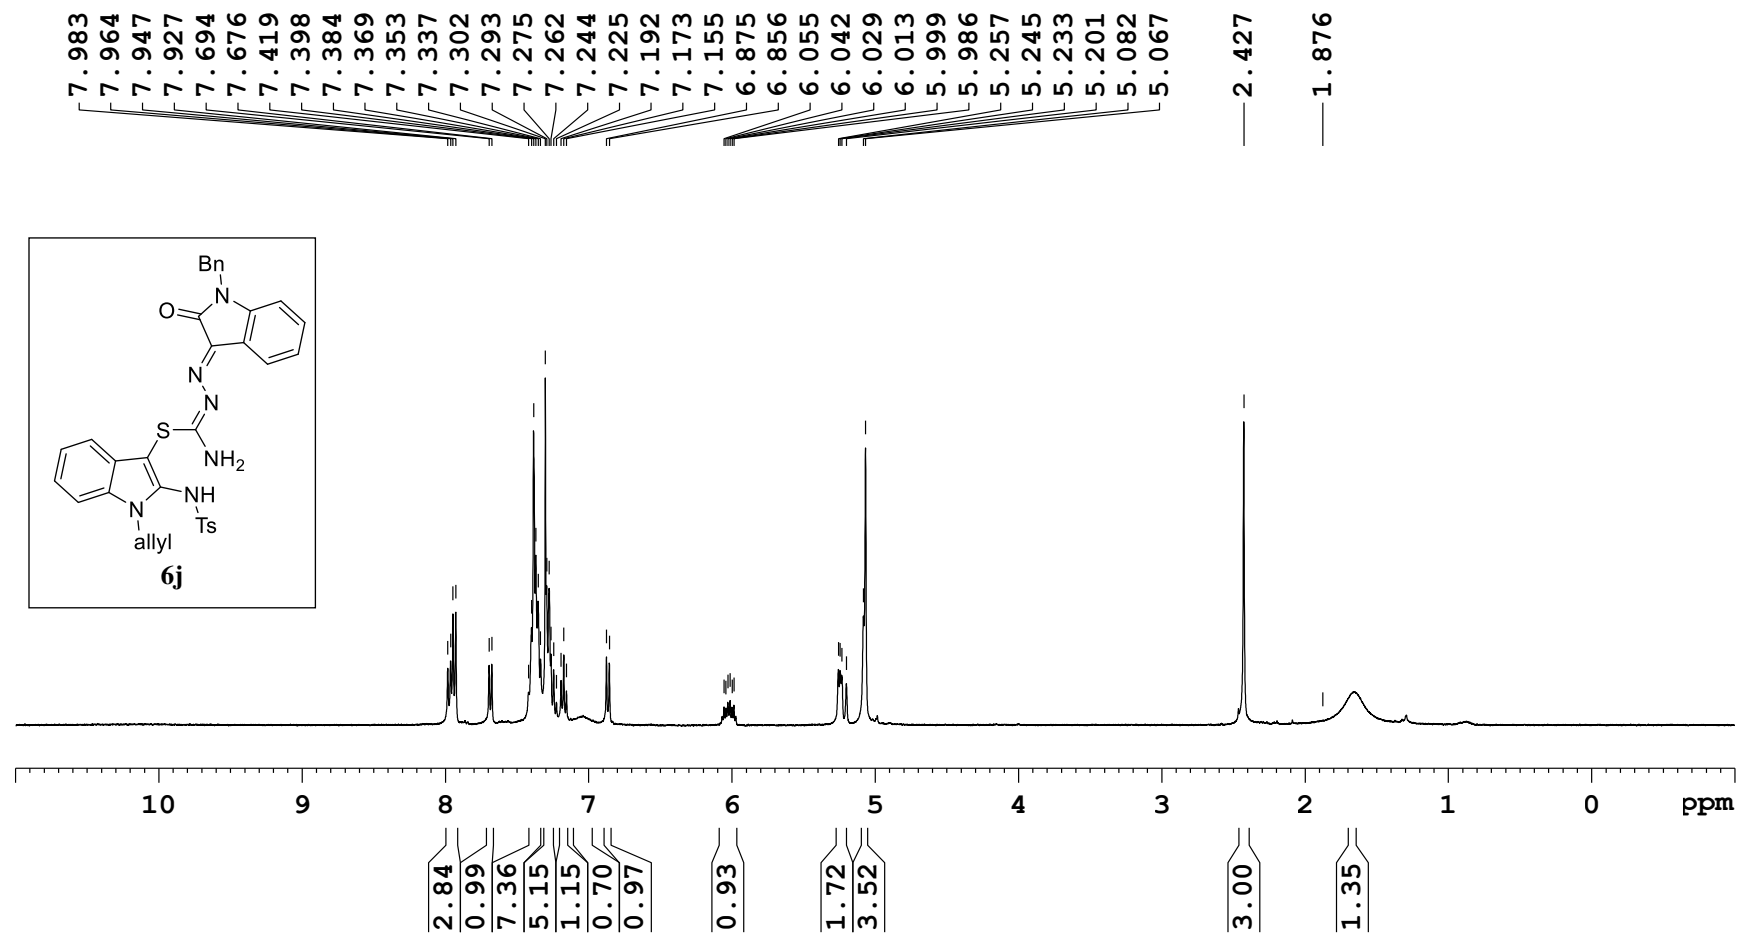

<sup>1</sup>H NMR Spectrum of **6j**

**1-Allyl-2-[(4-methylbenzene-1-sulfonyl)amino]-1H-indol-3-yl(2E)-2[(1-benzyl-2-oxoindolin-3-ylidene)]hydrazine-1-carboximidothioate (6j)**

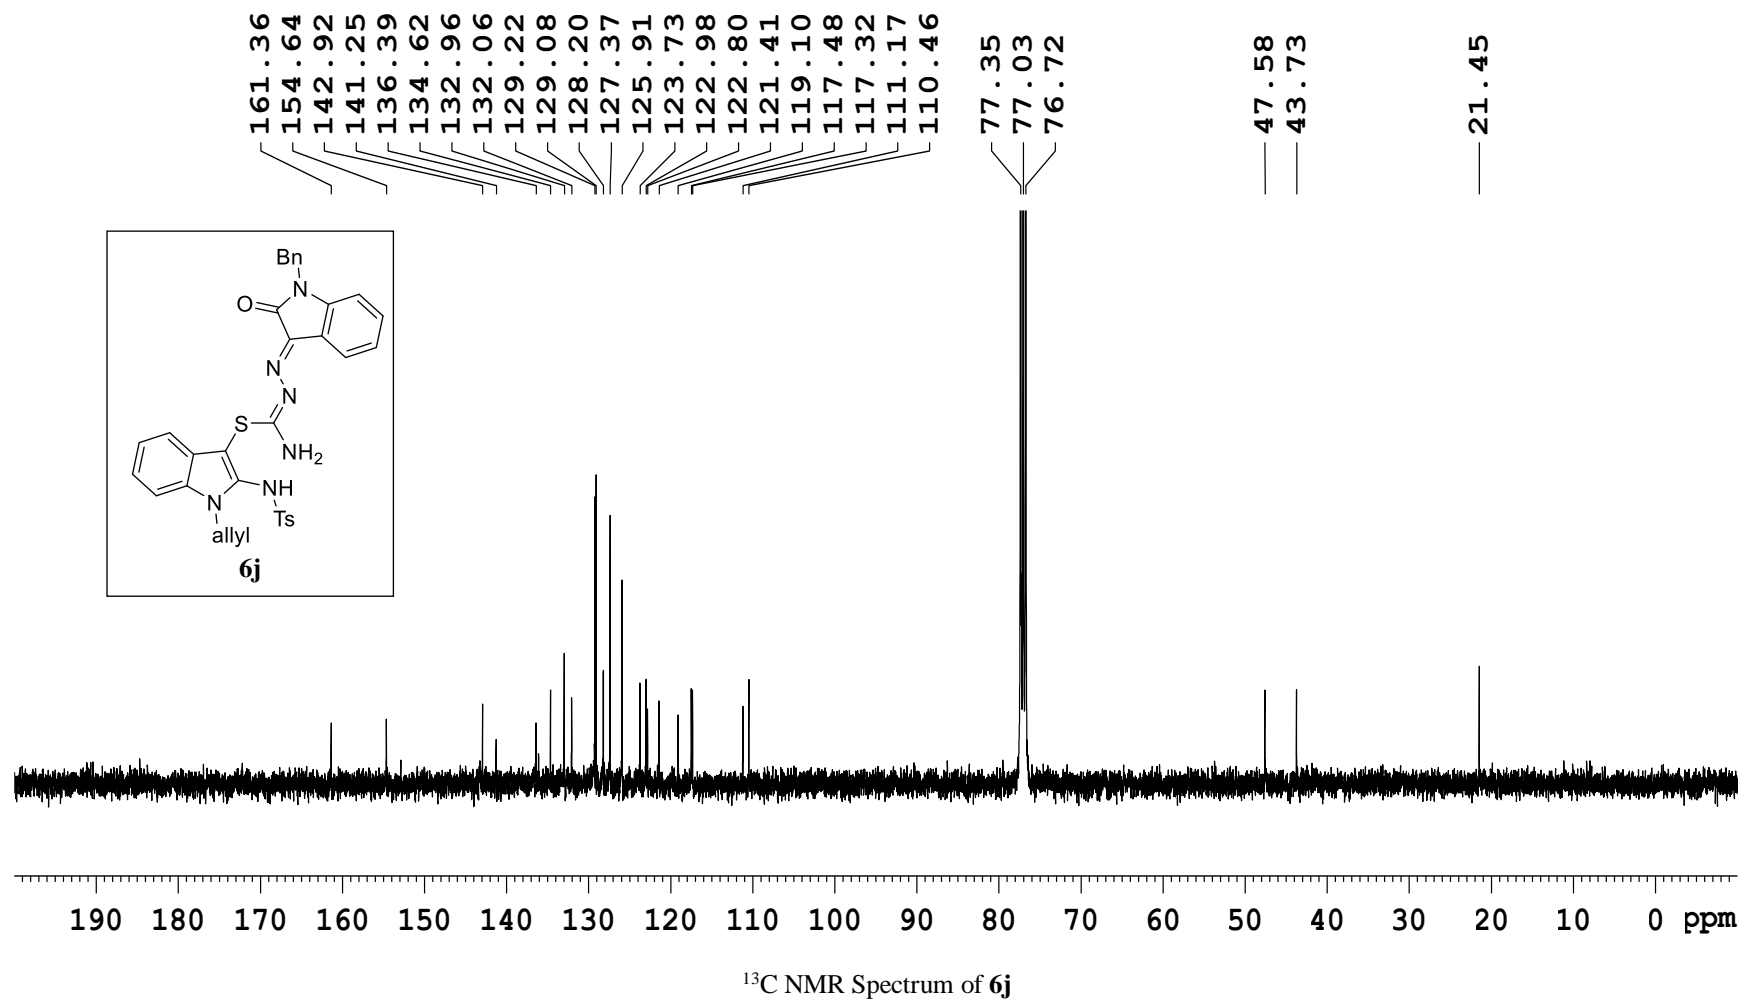

**1-Ethyl-2-[(4-methylbenzene-1-sulfonyl)amino]-1*H*-indol-3-yl(2*E*)-*N*-methyl-2-[(4-bromophenyl)methylidene]hydrazine-1-carboximidothioate (**6k**)**

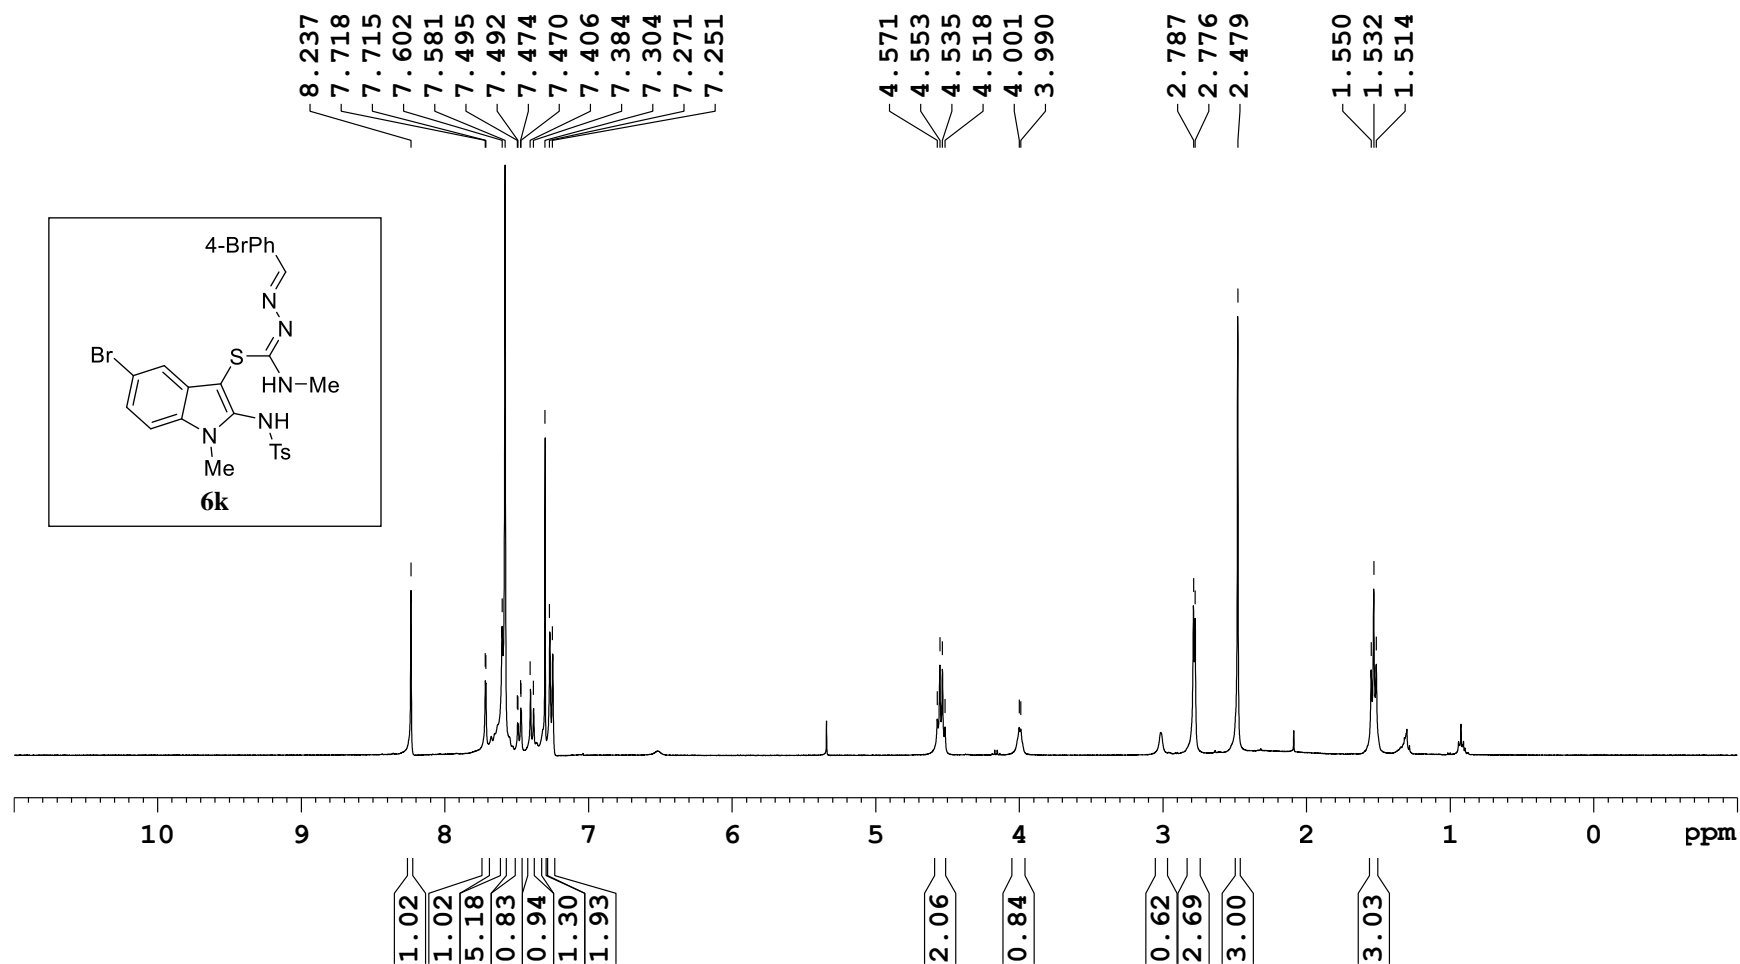

<sup>1</sup>H NMR Spectrum of **6k**

**1-Ethyl-2-[(4-methylbenzene-1-sulfonyl)amino]-1*H*-indol-3-yl(2*E*)-*N*-methyl-2-[(4-bromophenyl)methylidene]hydrazine-1-carboximidothioate (**6k**)**

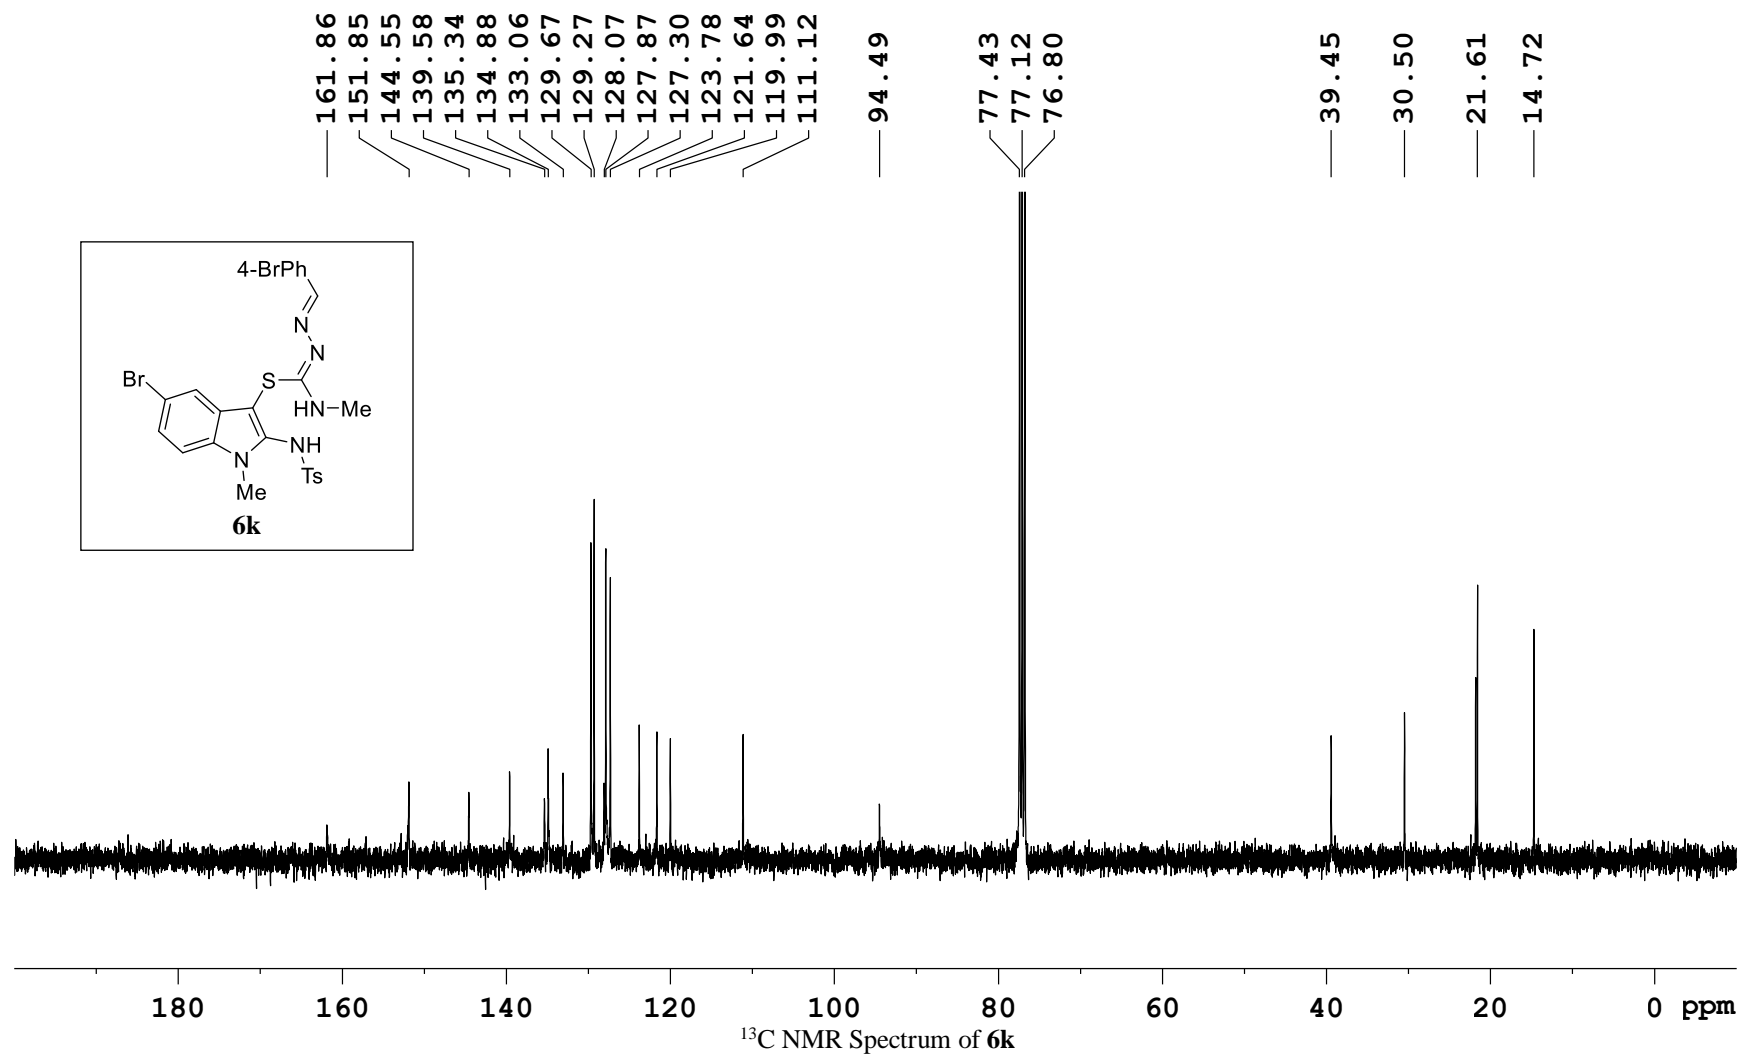



**1-Methyl-2-[(4-methylbenzene-1-sulfonyl)amino]-1*H*-indol-3-yl(2*E*)-2[(4-bromophenyl)methylidene]hydrazine-1-carboximidothioate (**6l**)**

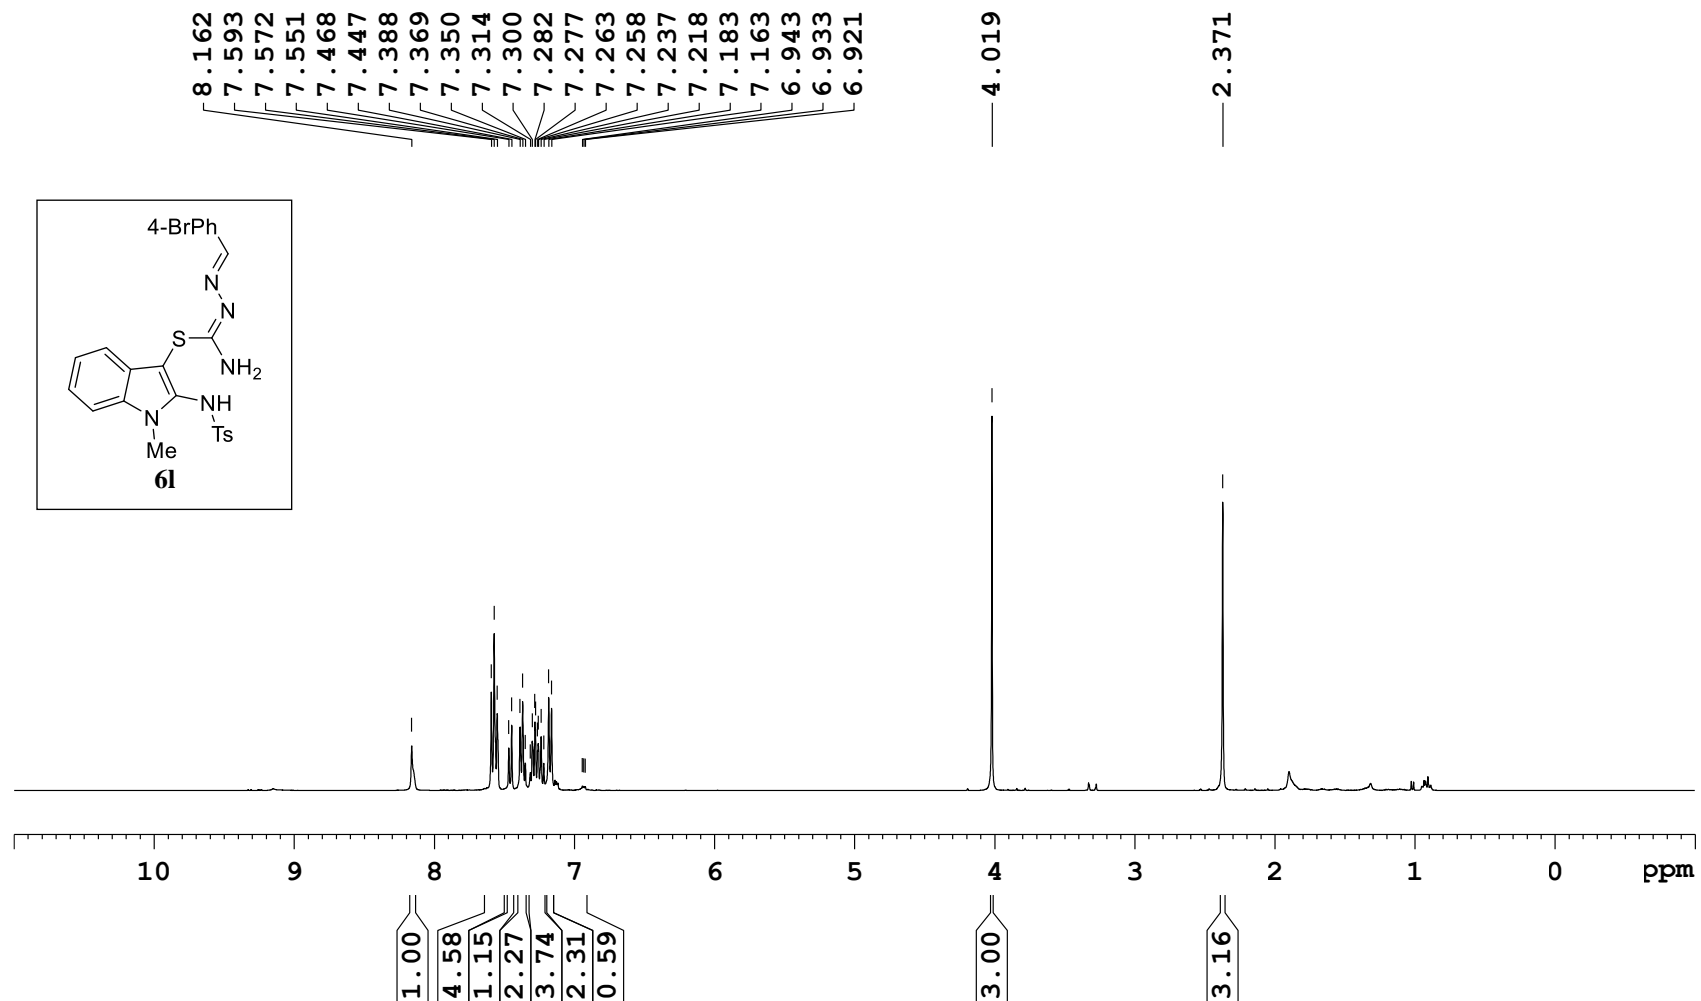

<sup>1</sup>H NMR Spectrum of **6l**

**1-Methyl-2-[(4-methylbenzene-1-sulfonyl)amino]-1*H*-indol-3-yl(2*E*)-2[(4-bromophenyl)methylidene]hydrazine-1-carboximidothioate (**6l**)**

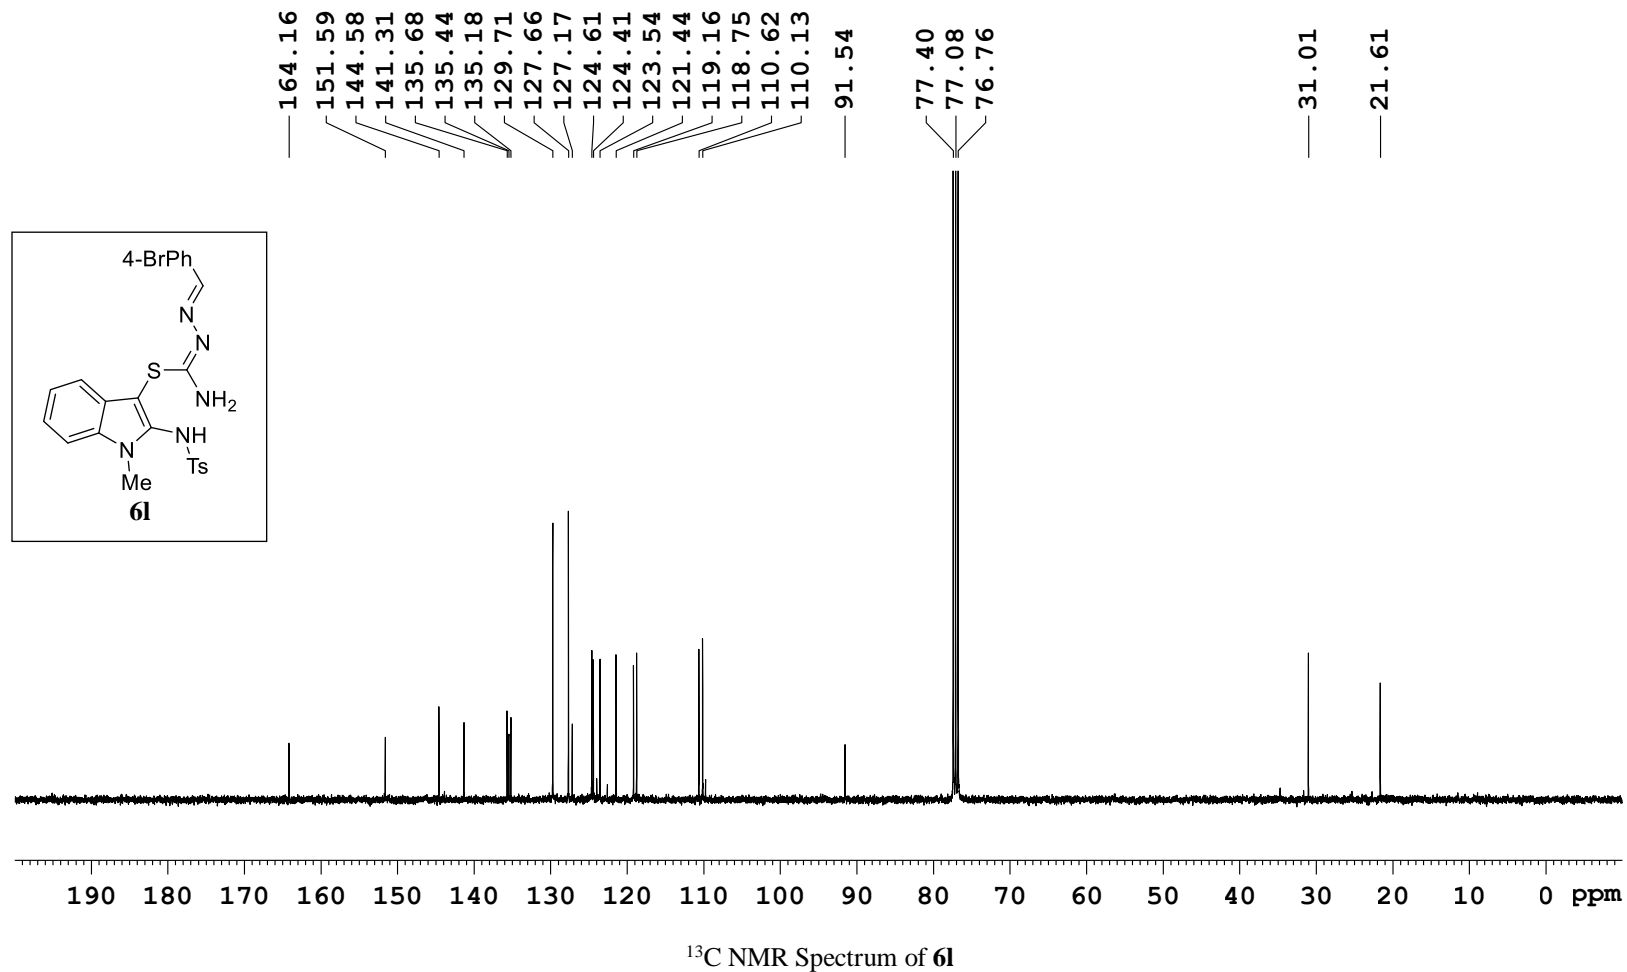

**1-Ethyl-2-[(4-methylbenzene-1-sulfonyl)amino]-5-methoxy-1*H*-indol-3-yl(2*E*)-2-[(phenyl)methylidene]hydrazine-1-carboximidothioate (**6m**)**

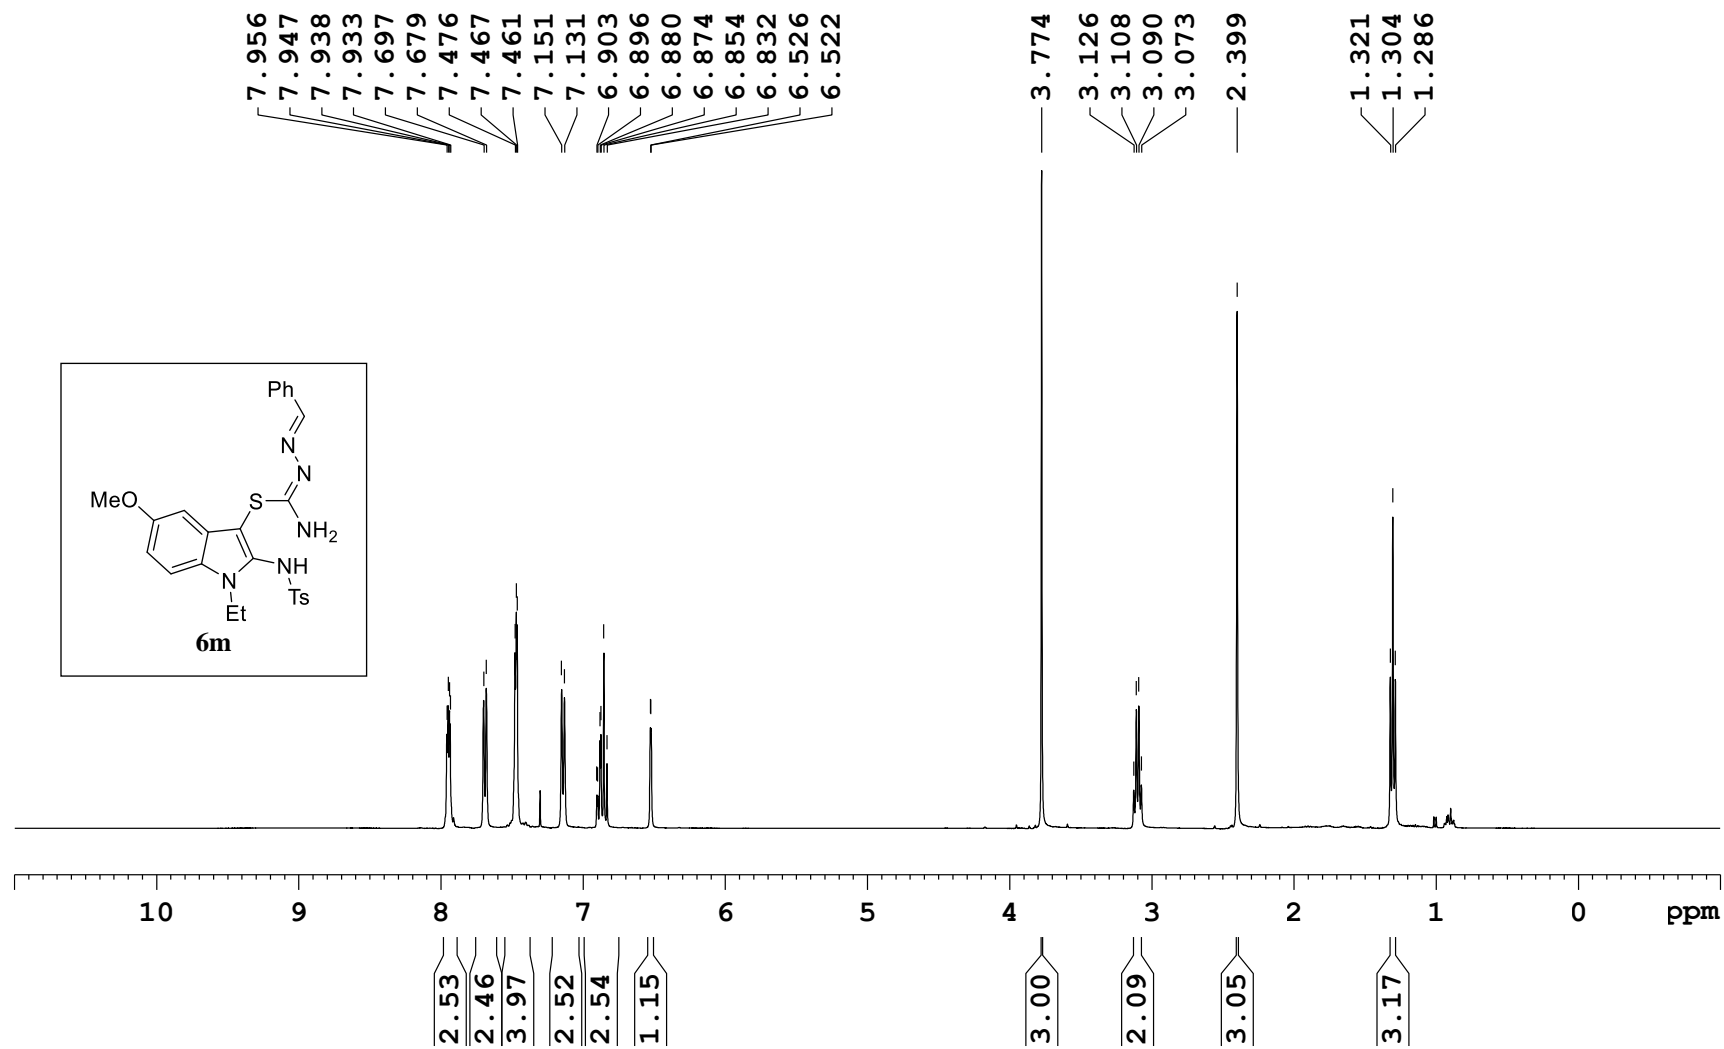

<sup>1</sup>H NMR Spectrum of **6m**

**1-Ethyl-2-[(4-methylbenzene-1-sulfonyl)amino]-5-methoxy-1*H*-indol-3-yl(2*E*)-2-[(phenyl)methylidene]hydrazine-1-carboximidothioate (**6m**)**

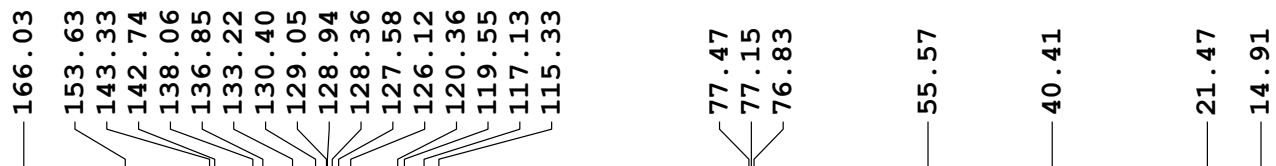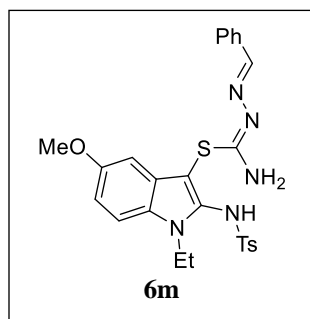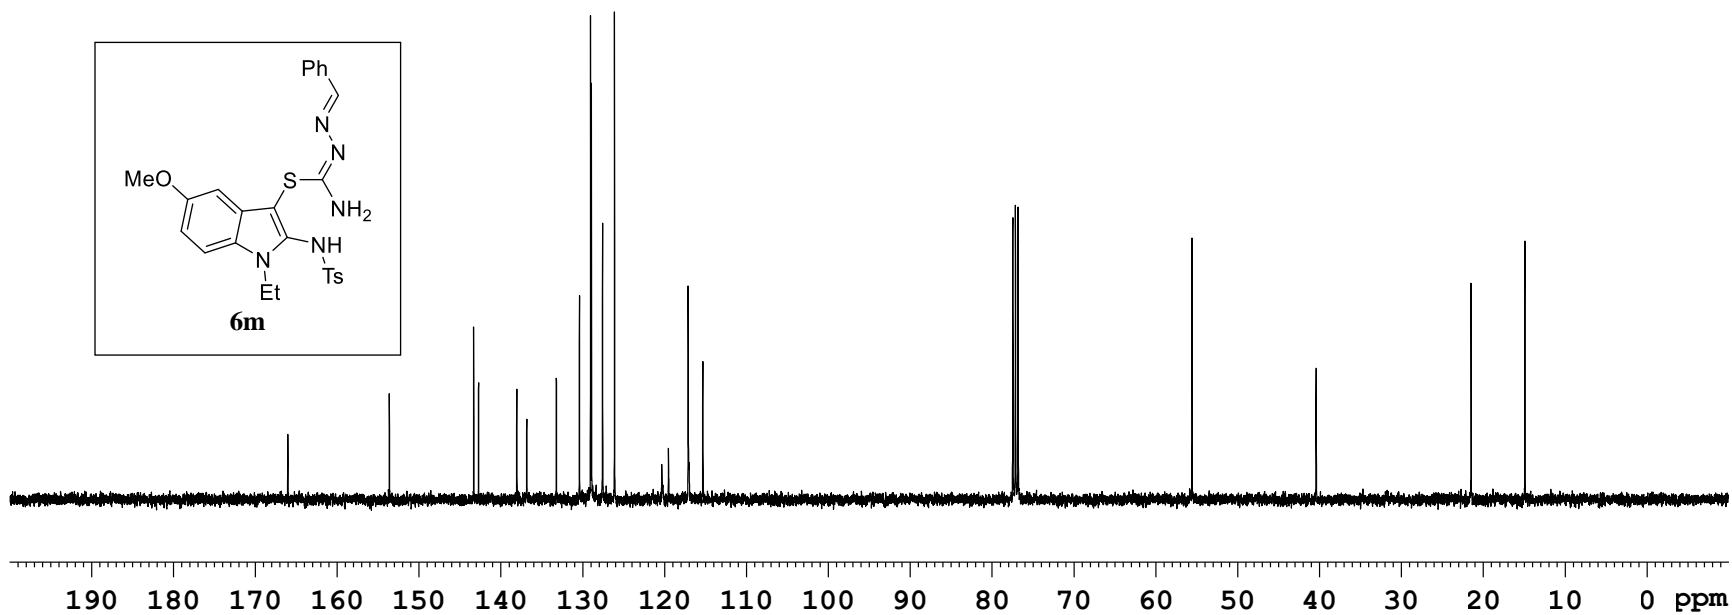

<sup>13</sup>C NMR Spectrum of **6m**

N-{1-Benzyl-3-[(1H-imidazol-2-yl)sulfanyl]-1H-indol-2-yl}4-methylbenzenesulfonamide (8a)

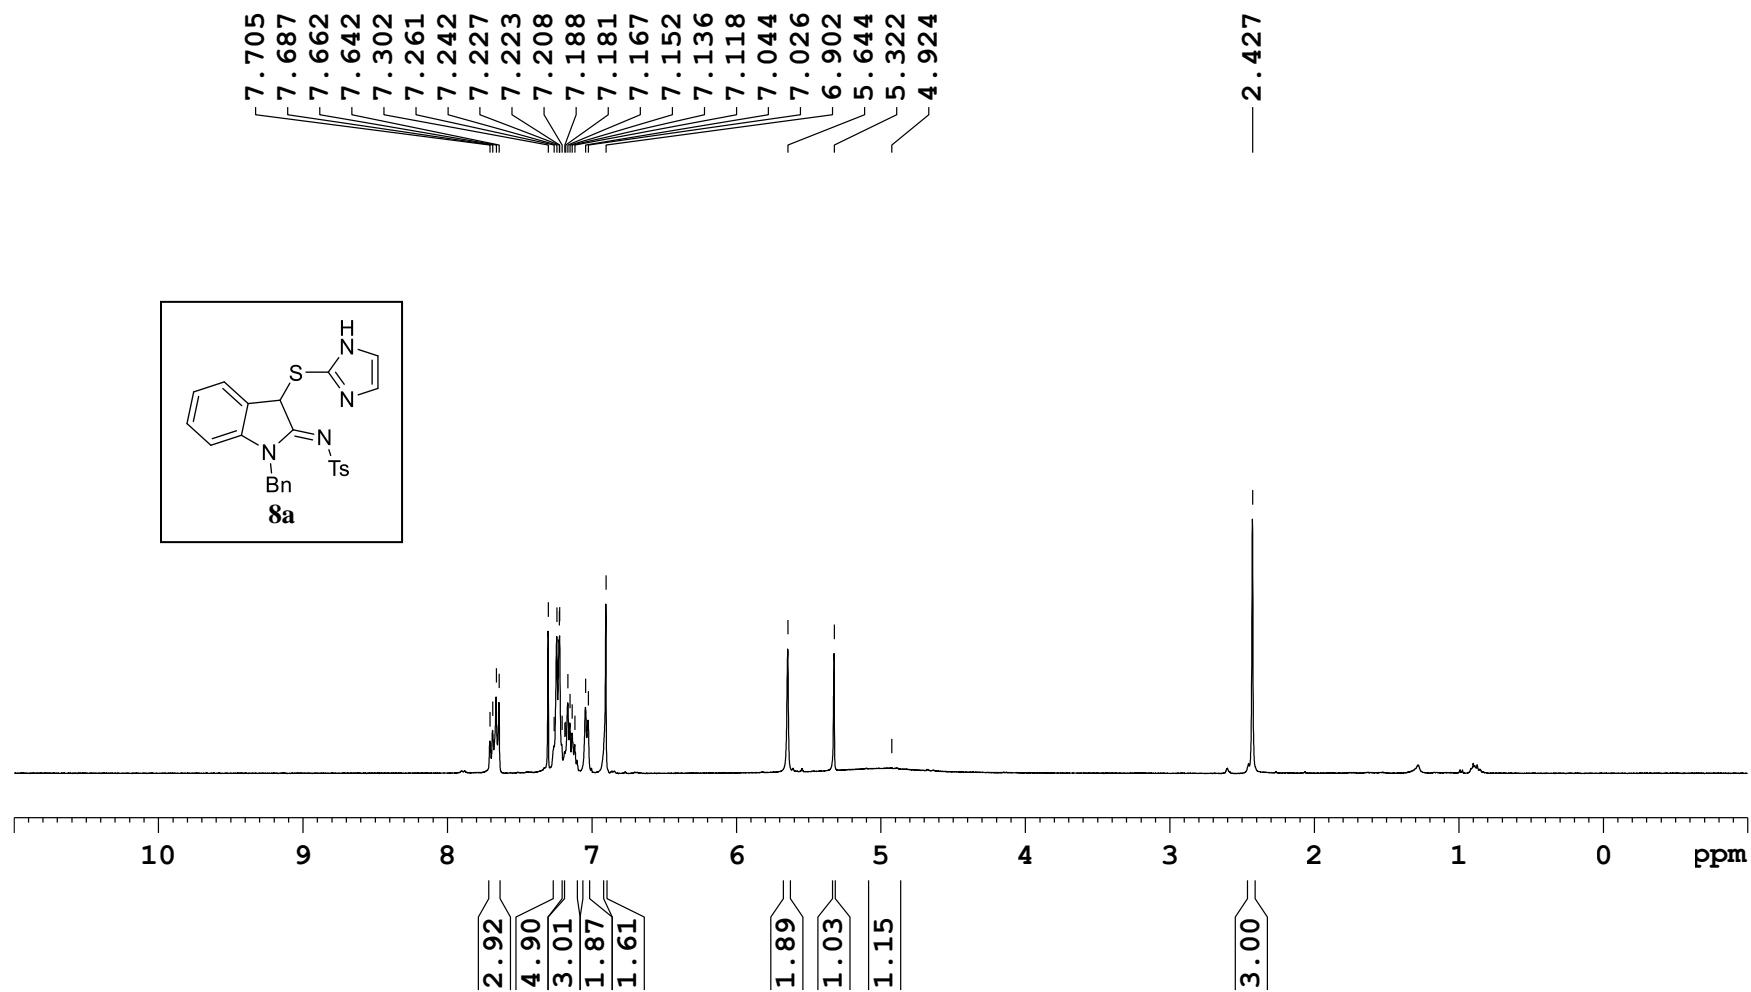

<sup>1</sup>H NMR Spectrum of 8a

N-{1-Benzyl-3-[(1H-imidazol-2-yl)sulfanyl]-1H-indol-2-yl}-4-methylbenzenesulfonamide (8a)

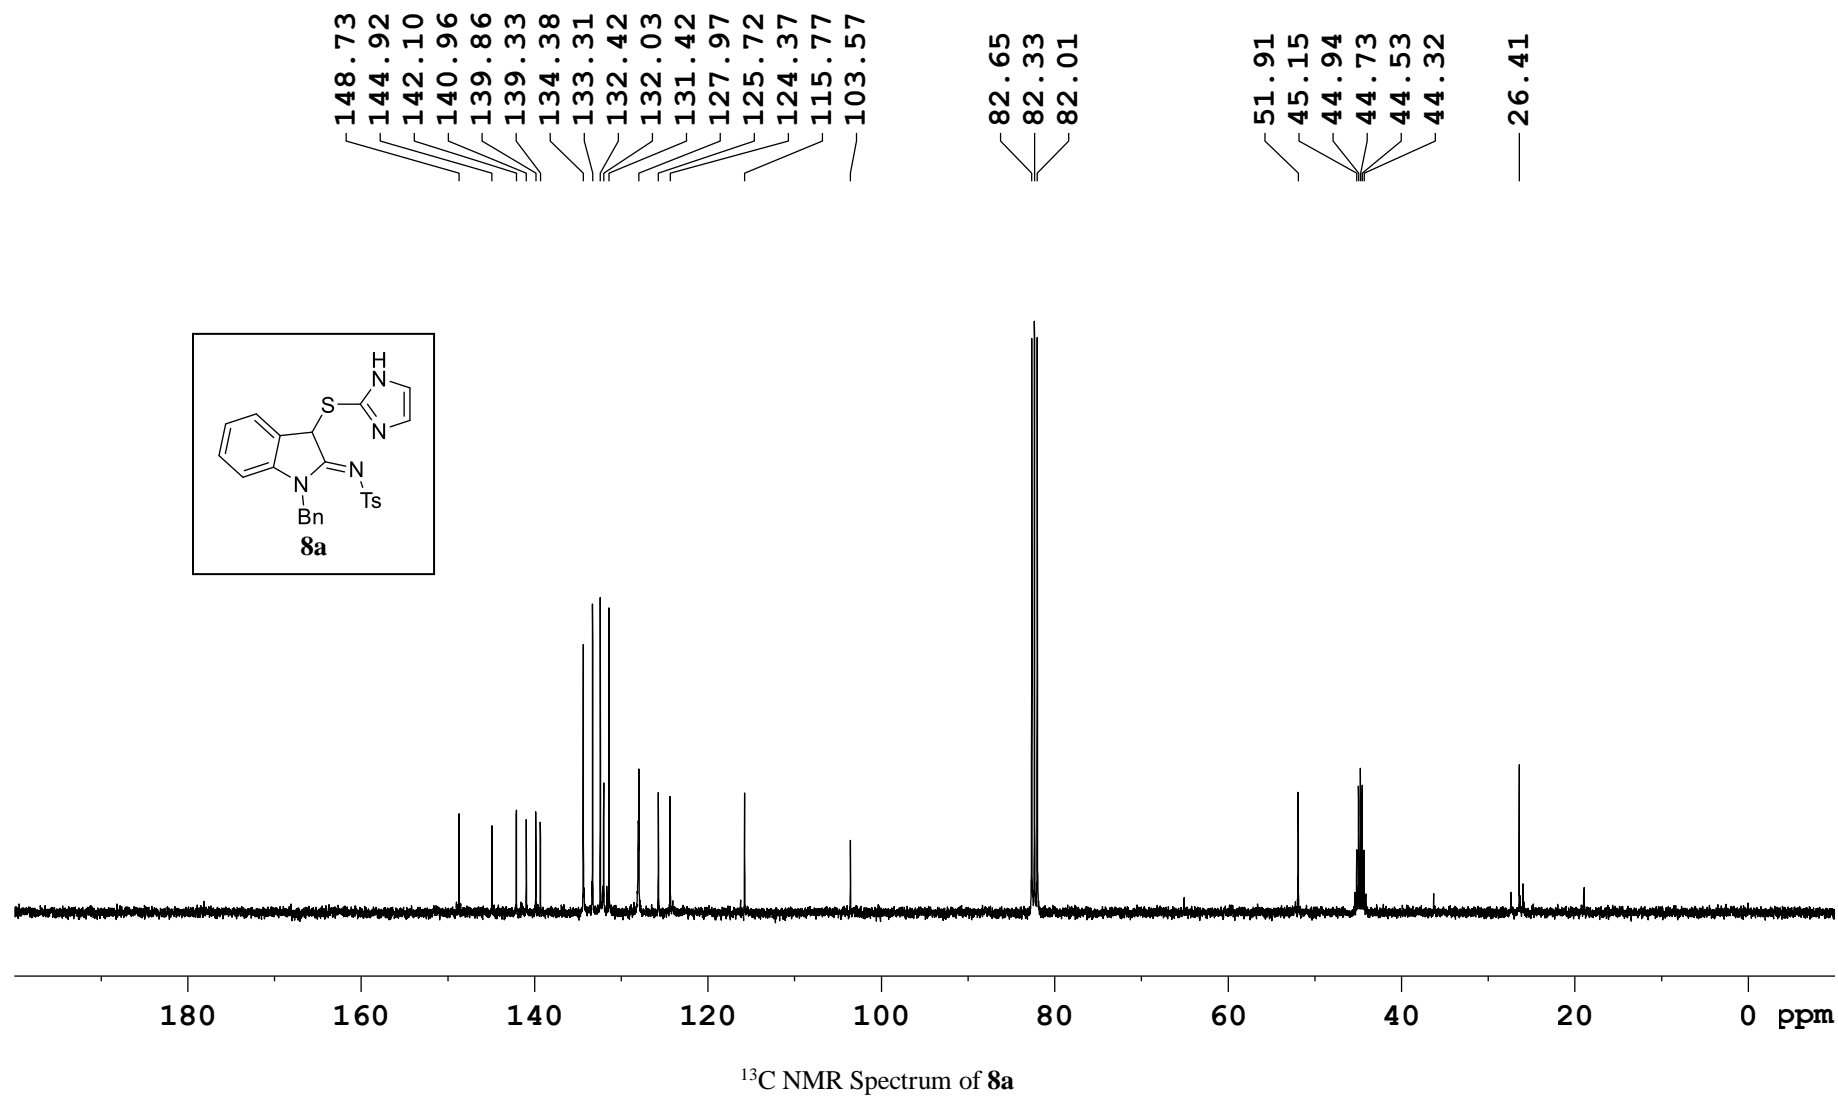

N-{1-Ethyl-3-[(5-methoxy-1H-benzo[d]imidazol-2-yl)sulfanyl]-5-bromo-1H-indol-2-yl}-4-methylbenzenesulfonamide (8b)

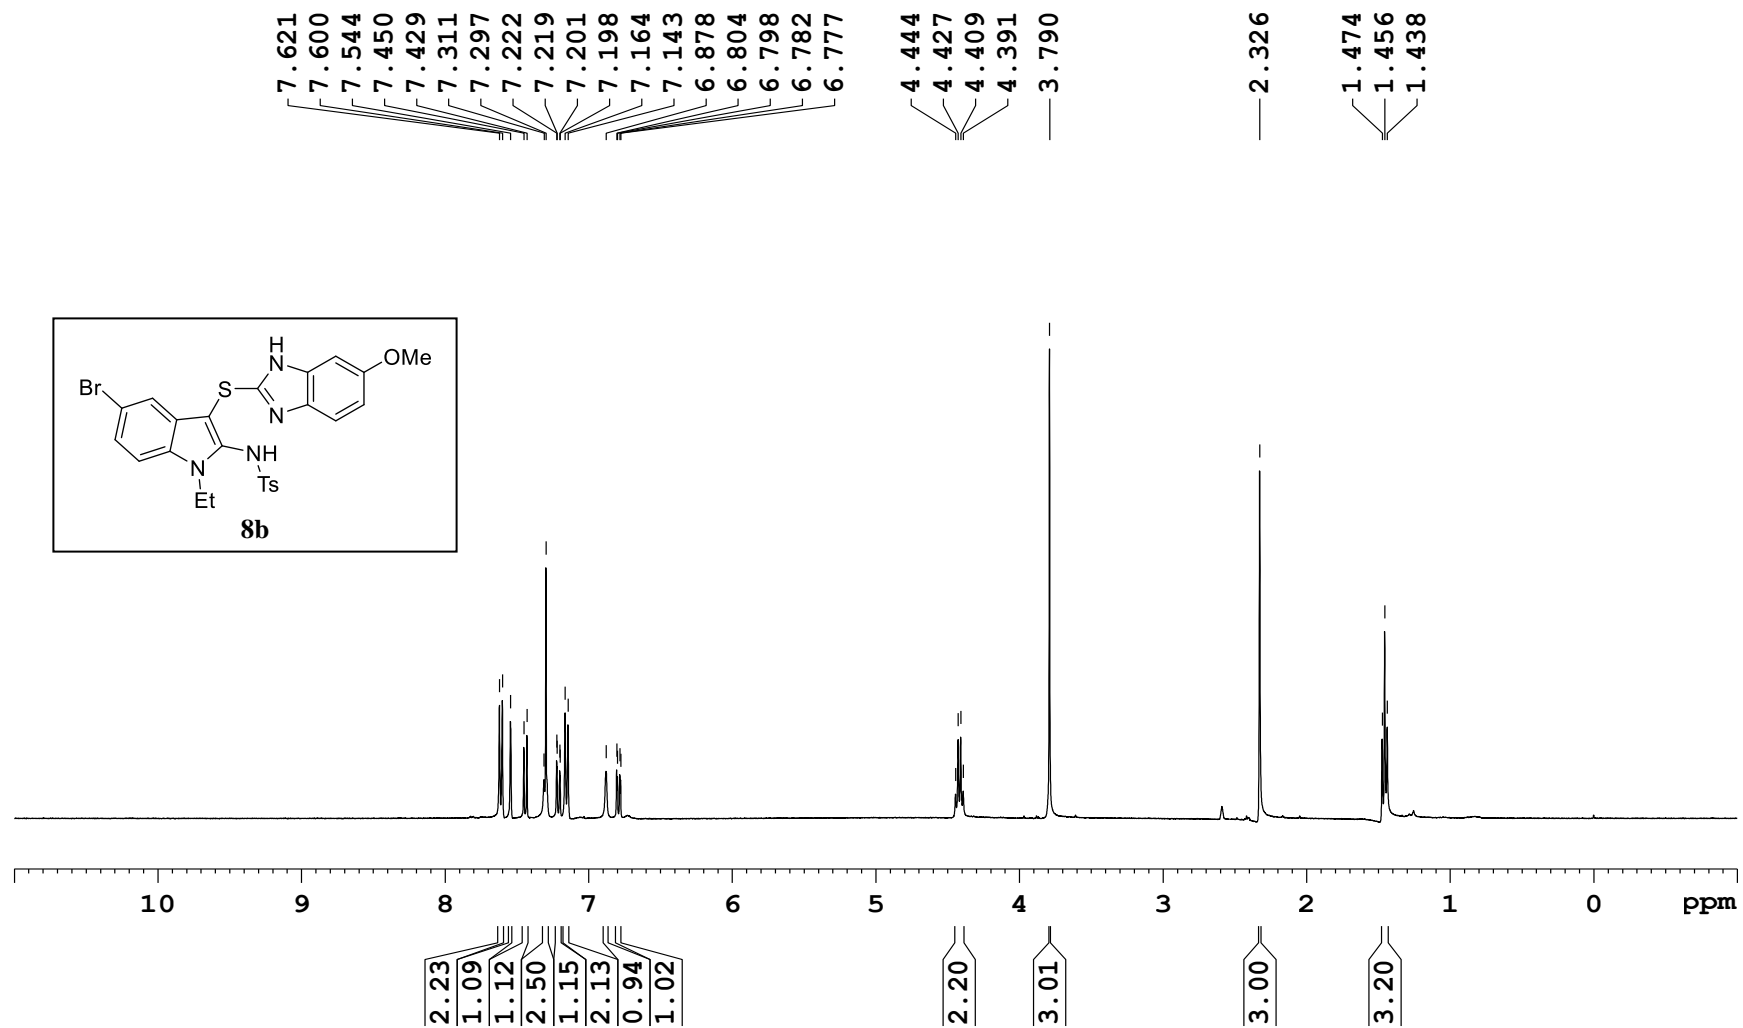

<sup>1</sup>H NMR Spectrum of **8b**

N-{1-Ethyl-3-[(5-methoxy-1H-benzo[d]imidazol-2-yl)sulfanyl]-5-bromo-1H-indol-2-yl}-4-methylbenzenesulfonamide (8b)

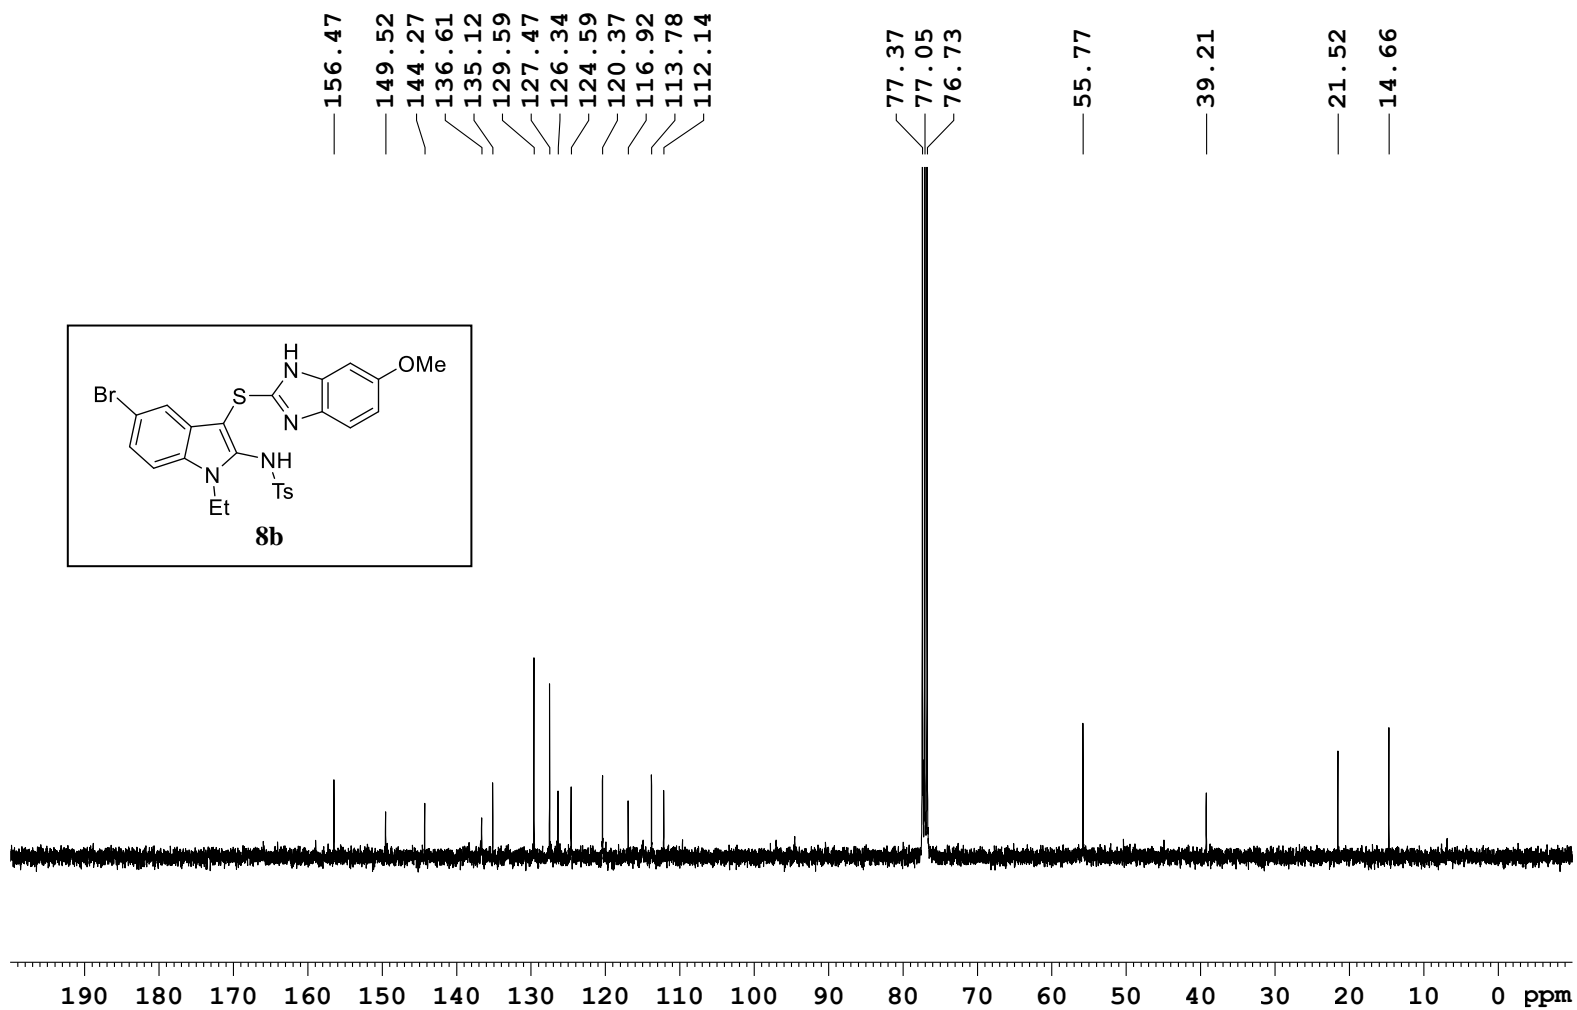

<sup>13</sup>C NMR Spectrum of 8b



N-{1-Ethyl-3-[(5-methoxy-1-H-benzo[d]imidazol-2-yl)sulfanyl]-1H-indol-2-yl}-4-methylbenzenesulfonamide (8c)

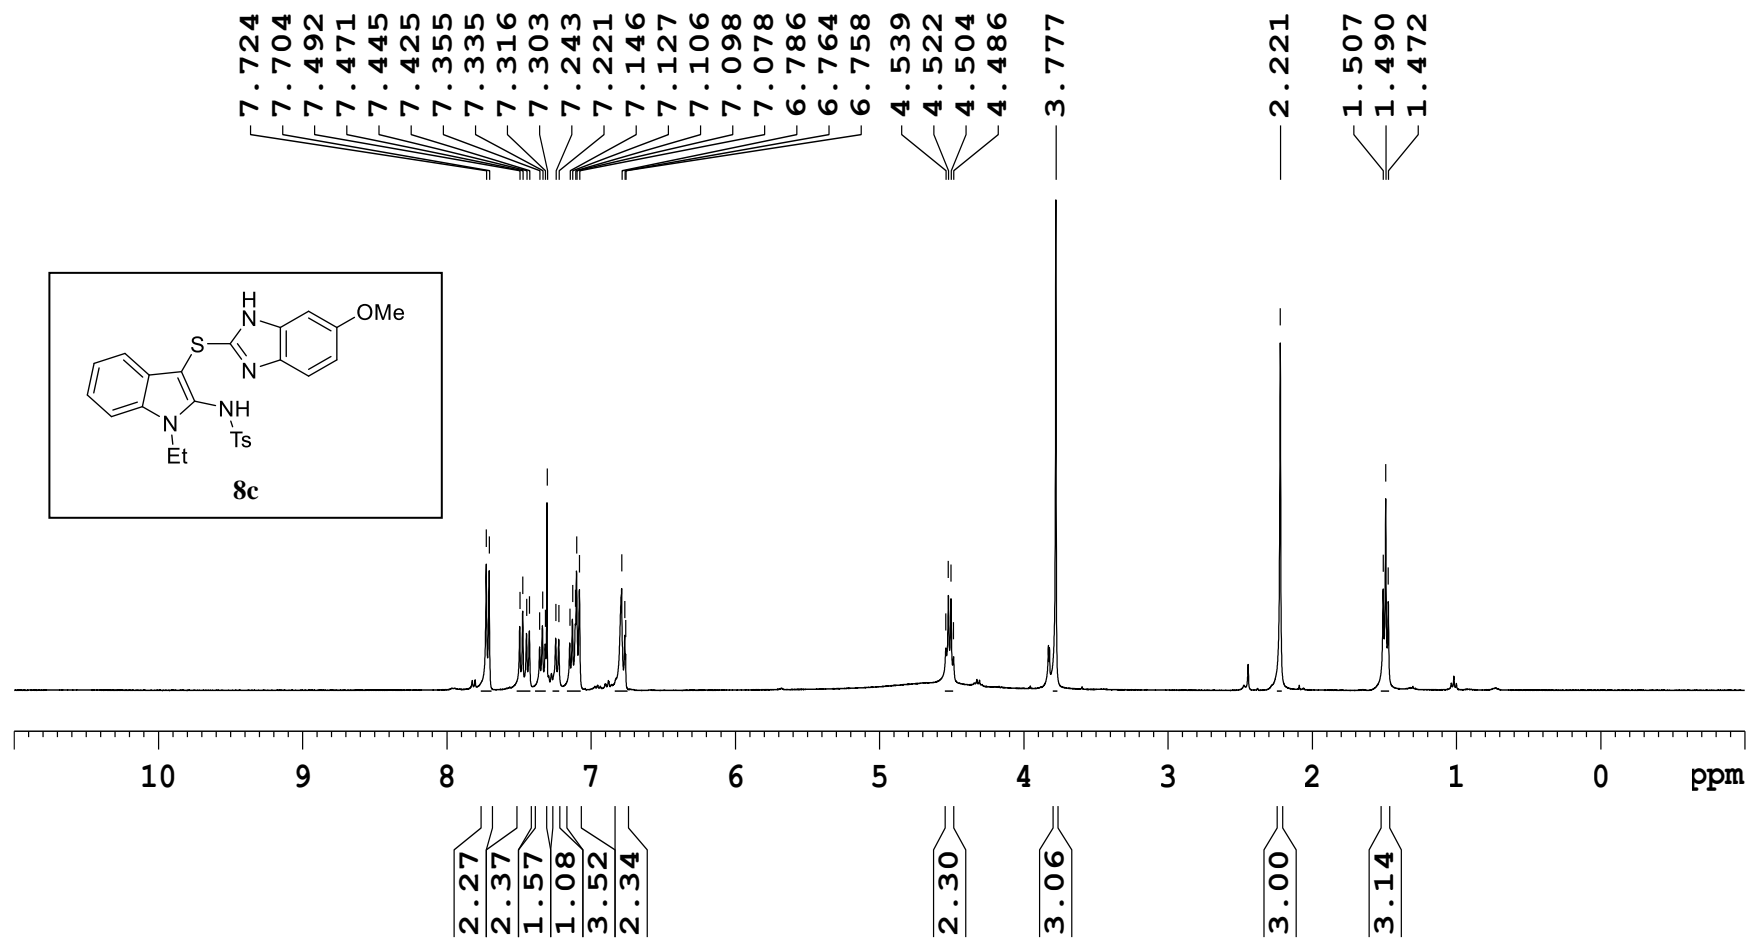

<sup>1</sup>H NMR Spectrum of 8c

N-{1-Ethyl-3-[(5-methoxy-1H-benzo[d]imidazol-2-yl)sulfanyl]-1H-indol-2-yl}-4-methylbenzenesulfonamide (8c)

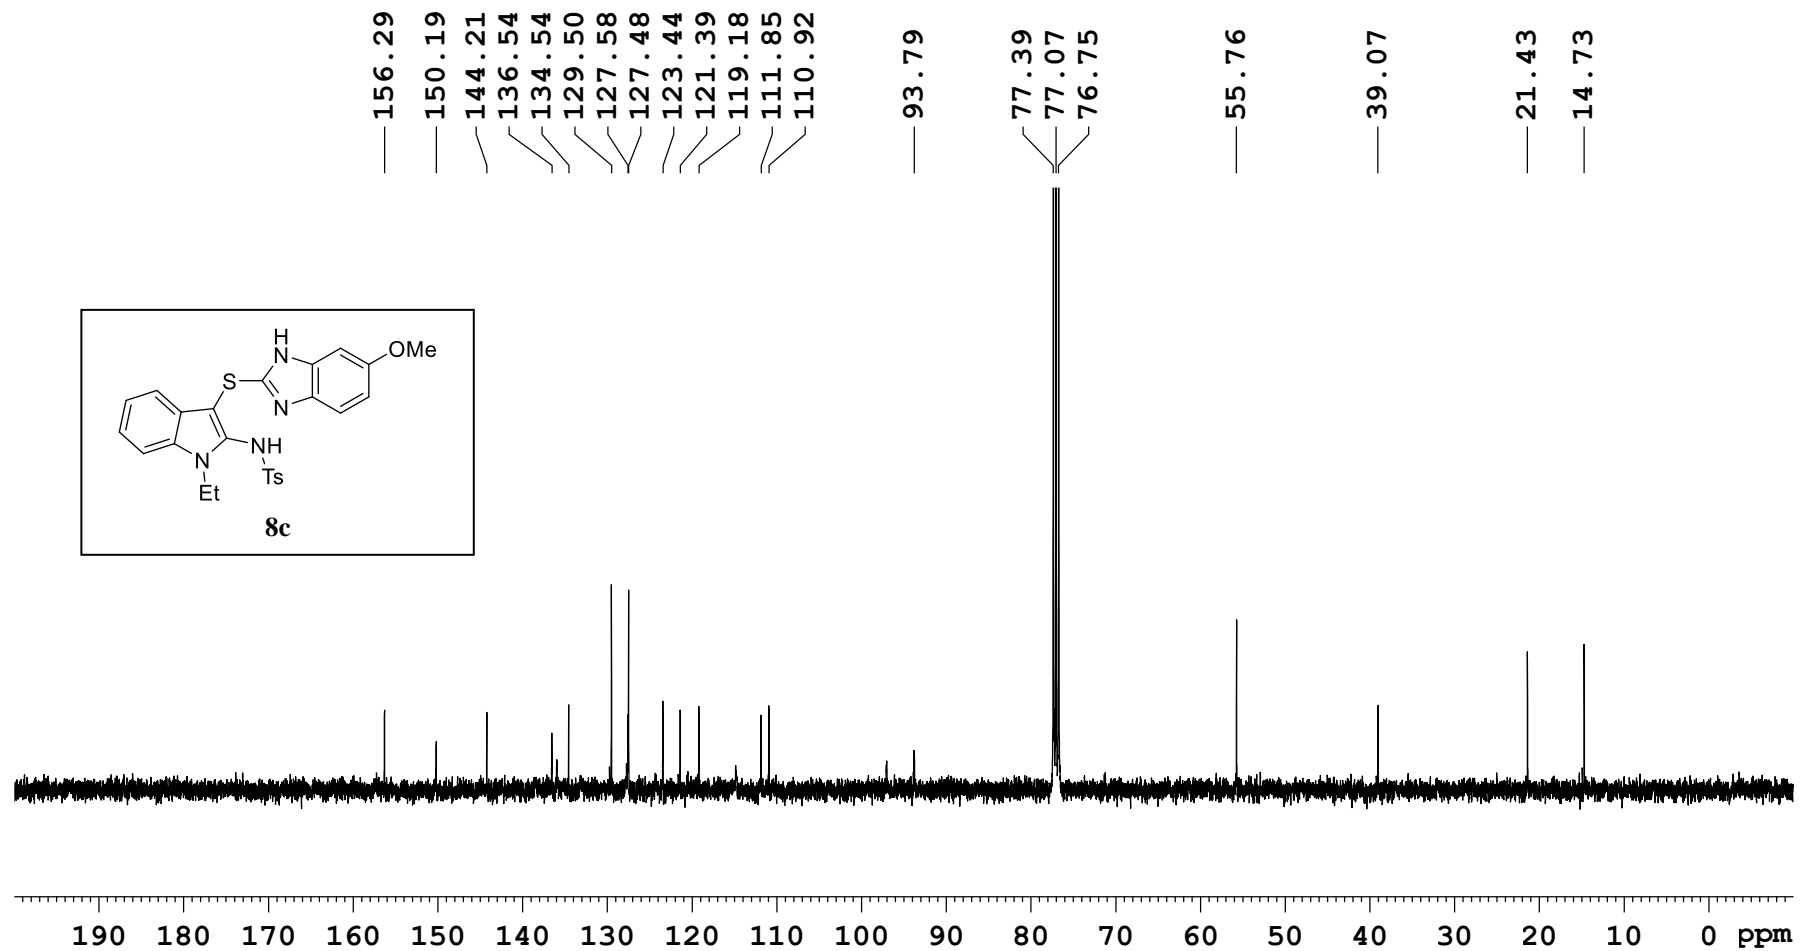

N-{1-Ethyl-3-[(5-nitro-1H-benzo[d]imidazol-2-yl)sulfanyl]-5-methoxy-1H-indol-2-yl}-4-methylbenzenesulfonamide (8d)

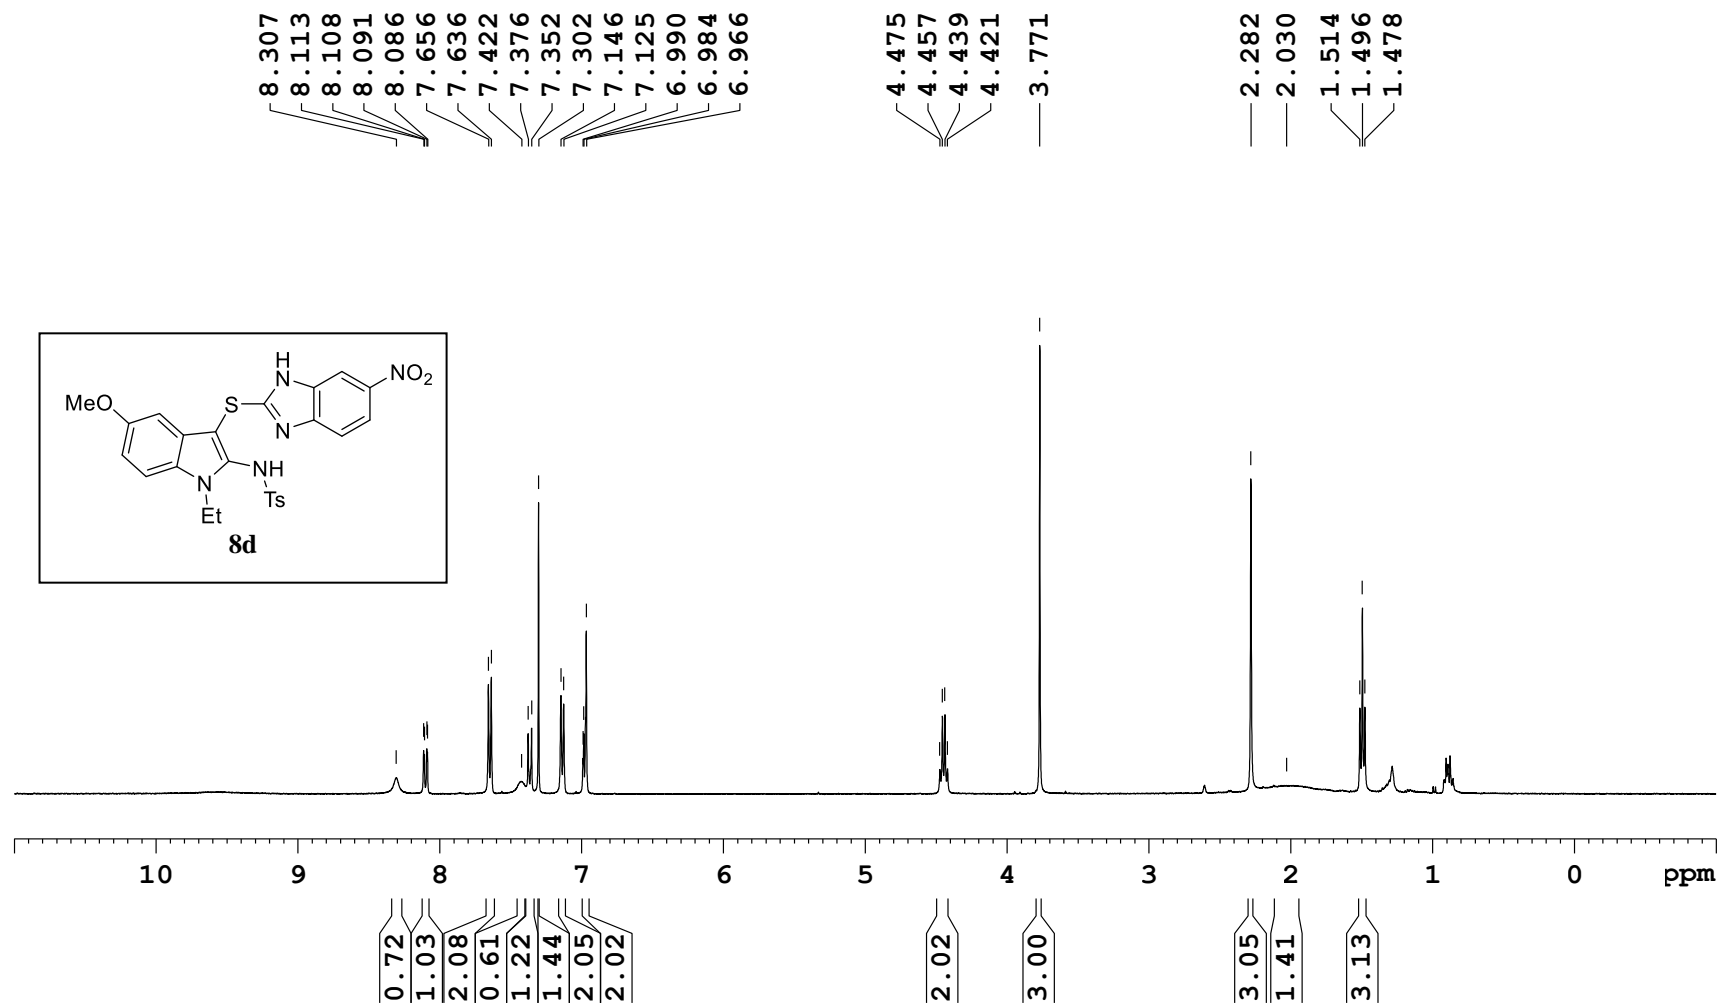

<sup>1</sup>H NMR Spectrum of 8d

N-{1-Ethyl-3-[(5-nitro-1H-benzo[d]imidazol-2-yl)sulfanyl]-5-methoxy-1H-indol-2-yl}-4-methylbenzenesulfonamide (8d)

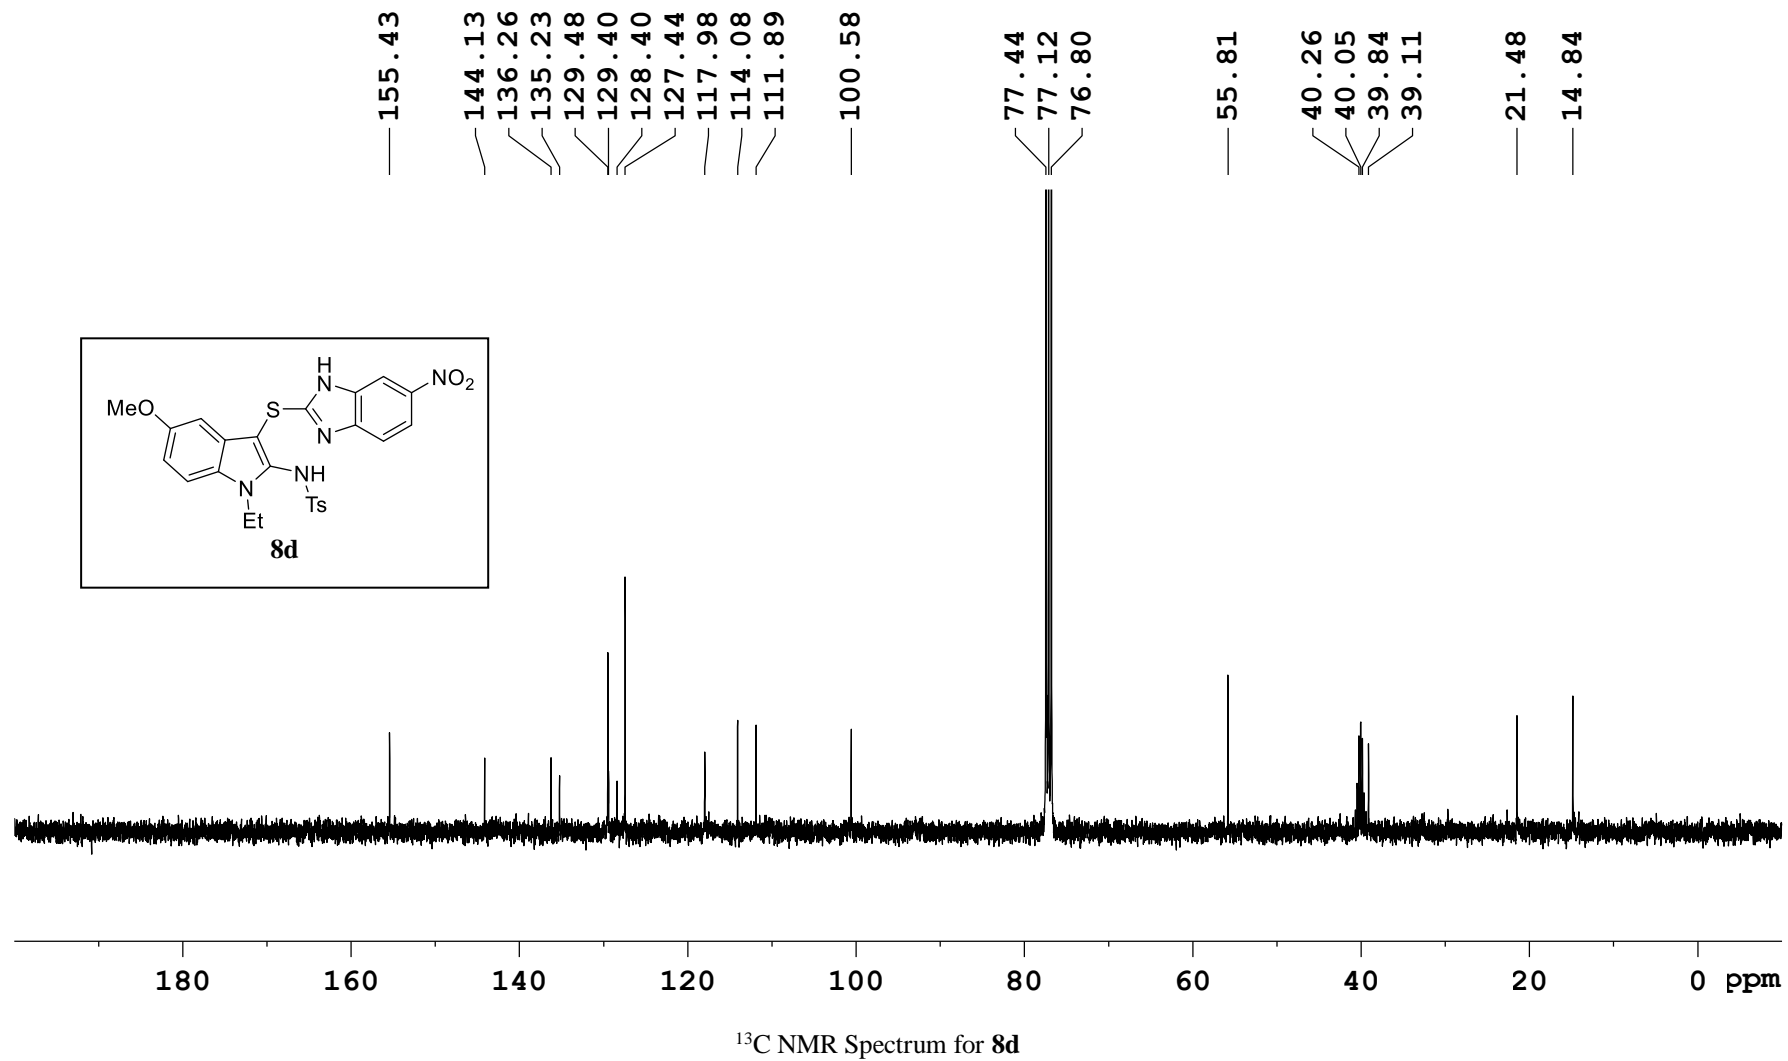

N-{1-Methyl-3-[(1H-benzo[d]oxazol-2-yl)sulfanyl]-1H-indol-2-yl}-4-methylbenzenesulfonamide (**8e**)

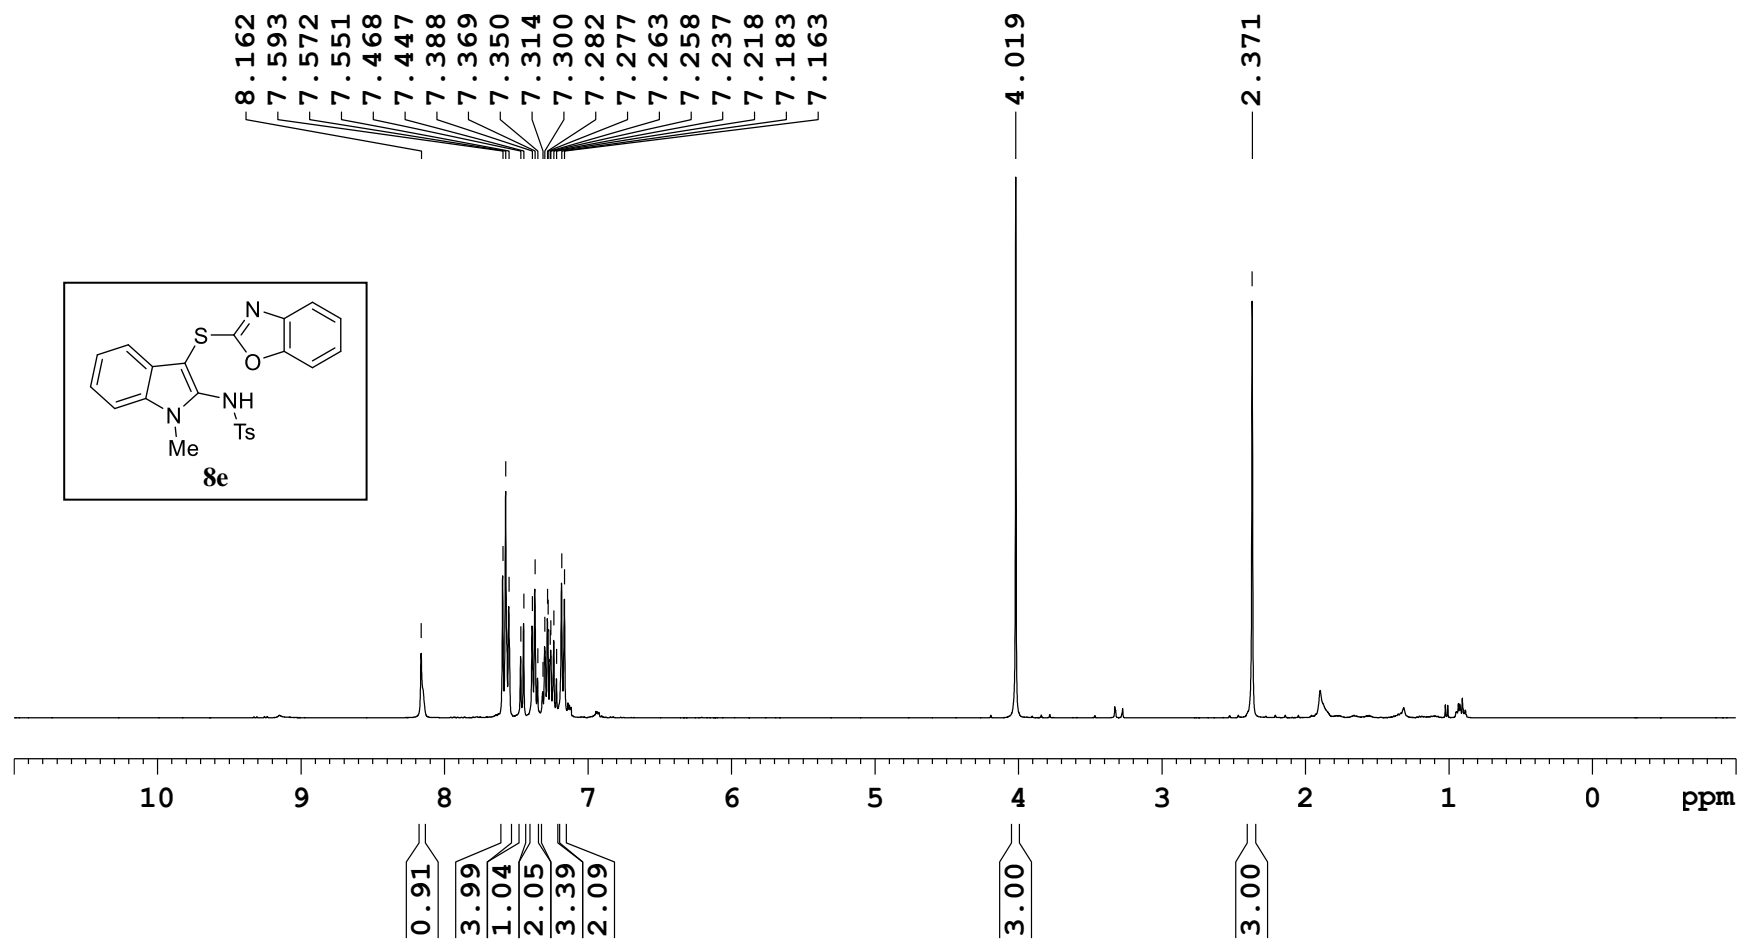

<sup>1</sup>H NMR Spectrum of **8e**

N-{1-Methyl-3-[(1H-benzo[d]oxazol-2-yl)sulfanyl]-1H-indol-2-yl}-4-methylbenzenesulfonamide (8e)

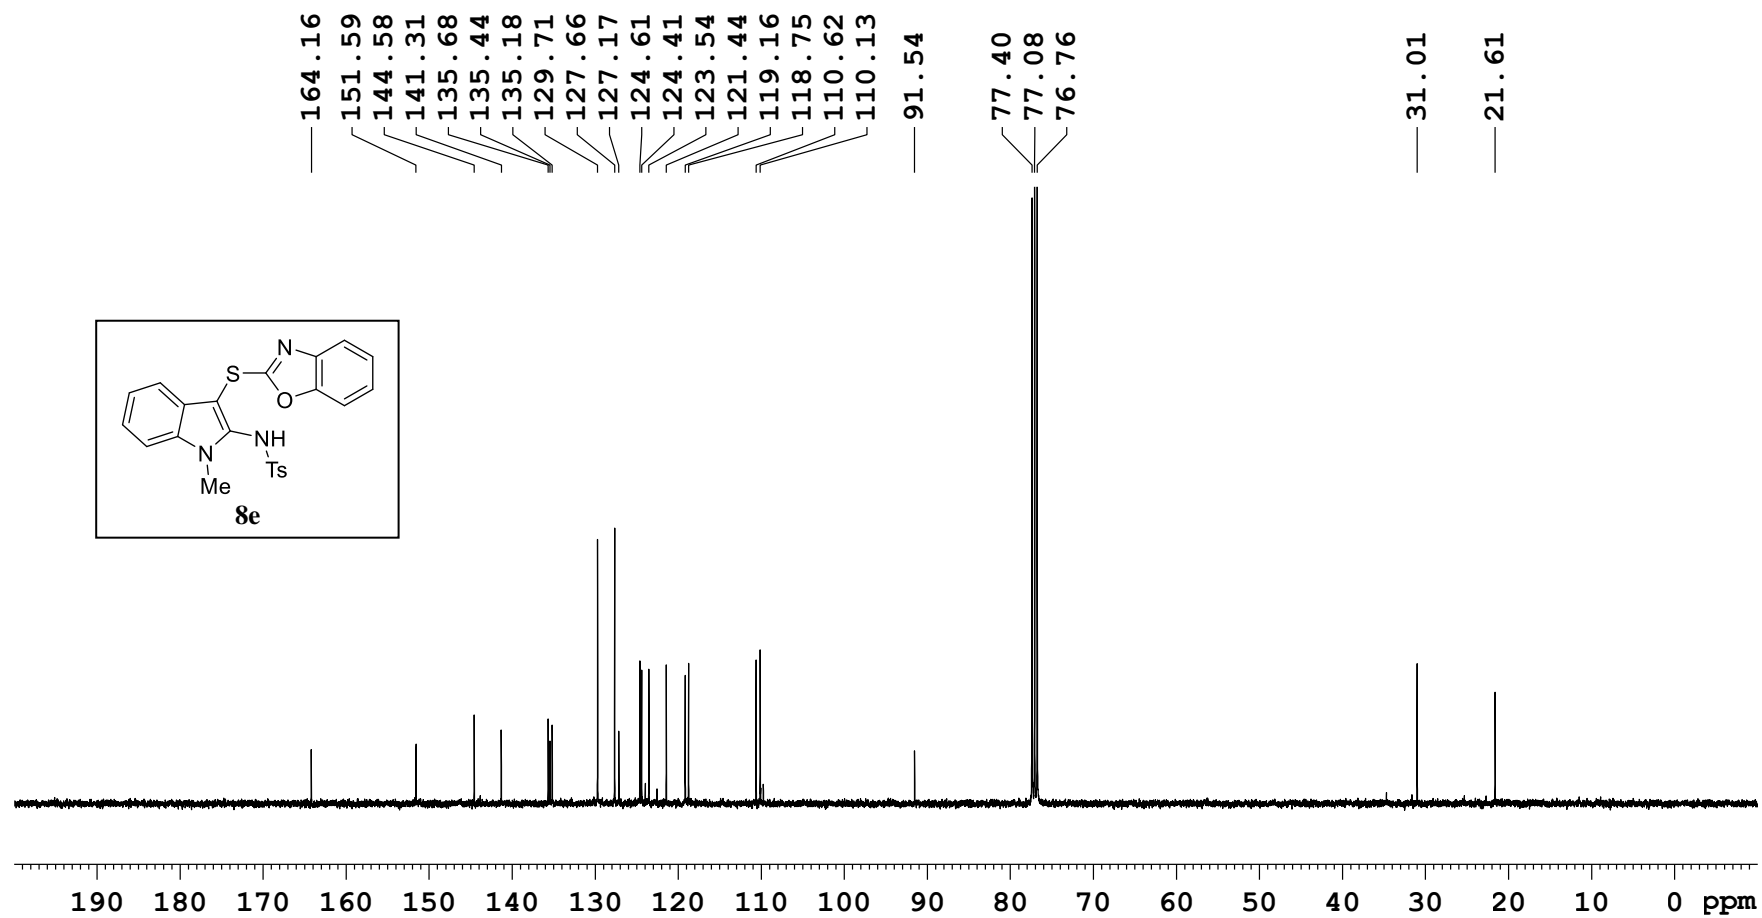

<sup>13</sup>C NMR Spectrum of 8e

N-{1-Allyl-3-[(5-chloro-1H-benzo[d]thiazol-2-yl)sulfanyl]-1H-indol-2-yl}-4-methylbenzenesulfonamide (8f)

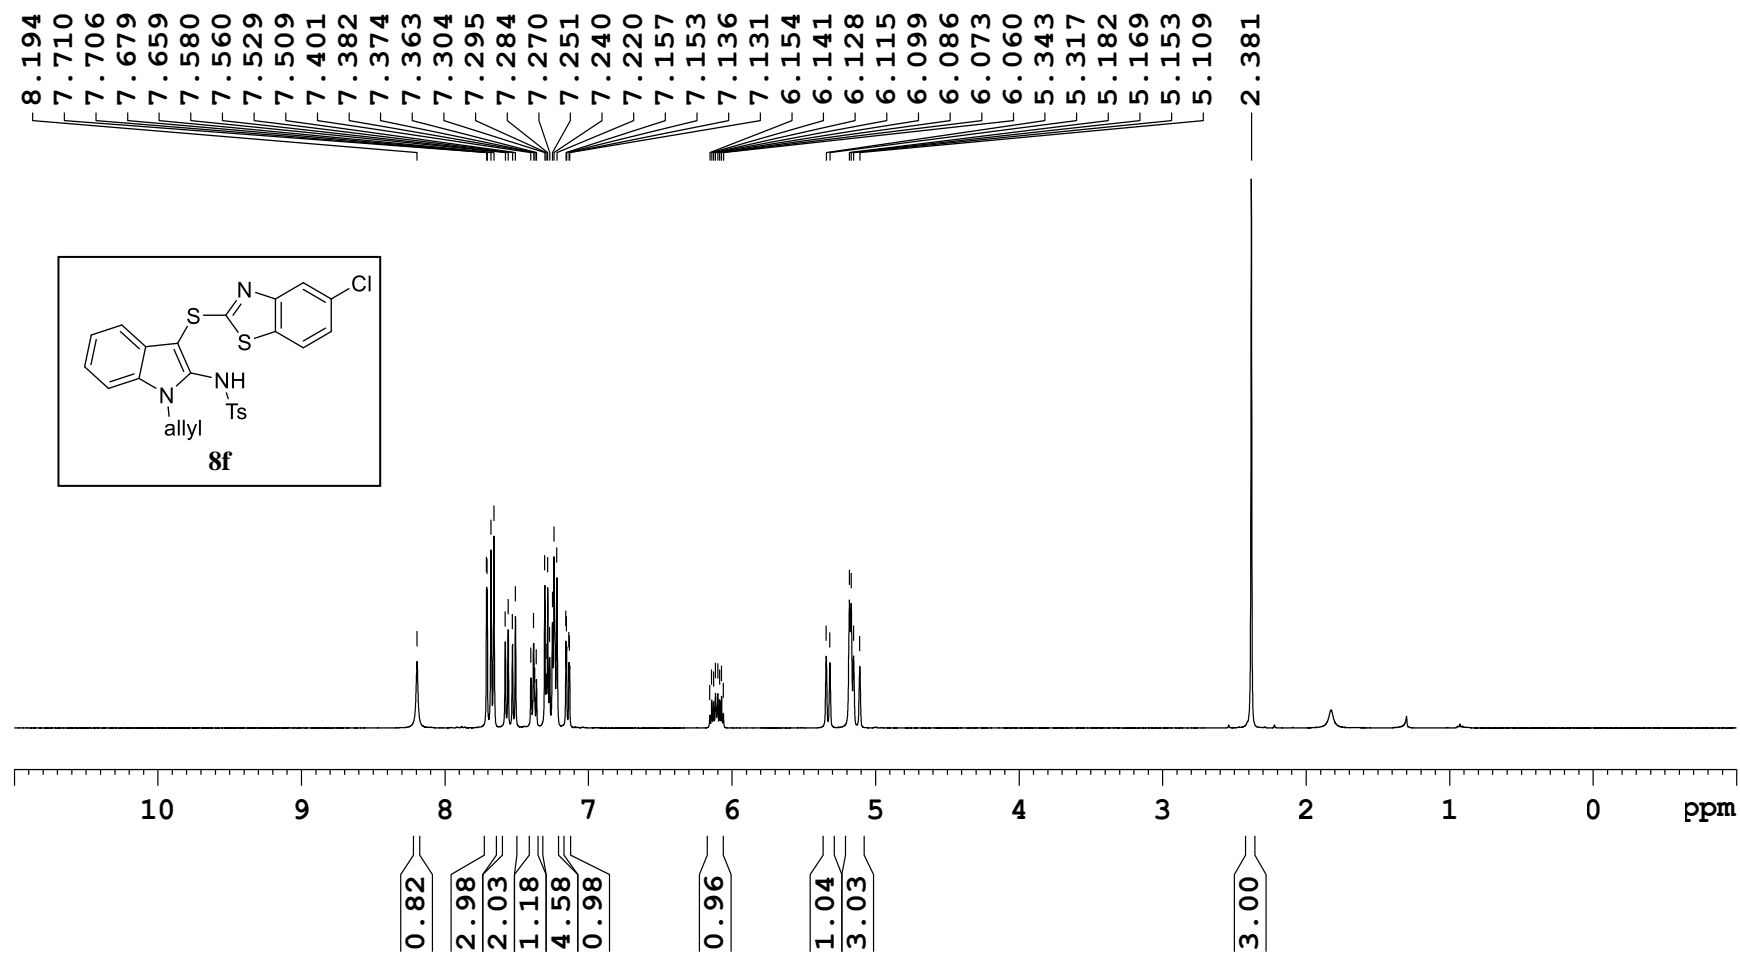

<sup>1</sup>H NMR Spectrum of 8f

N-{1-Allyl-3-[(5-chloro-1H-benzo[d]thiazol-2-yl)sulfanyl]-1H-indol-2-yl}-4-methylbenzenesulfonamide (8f)

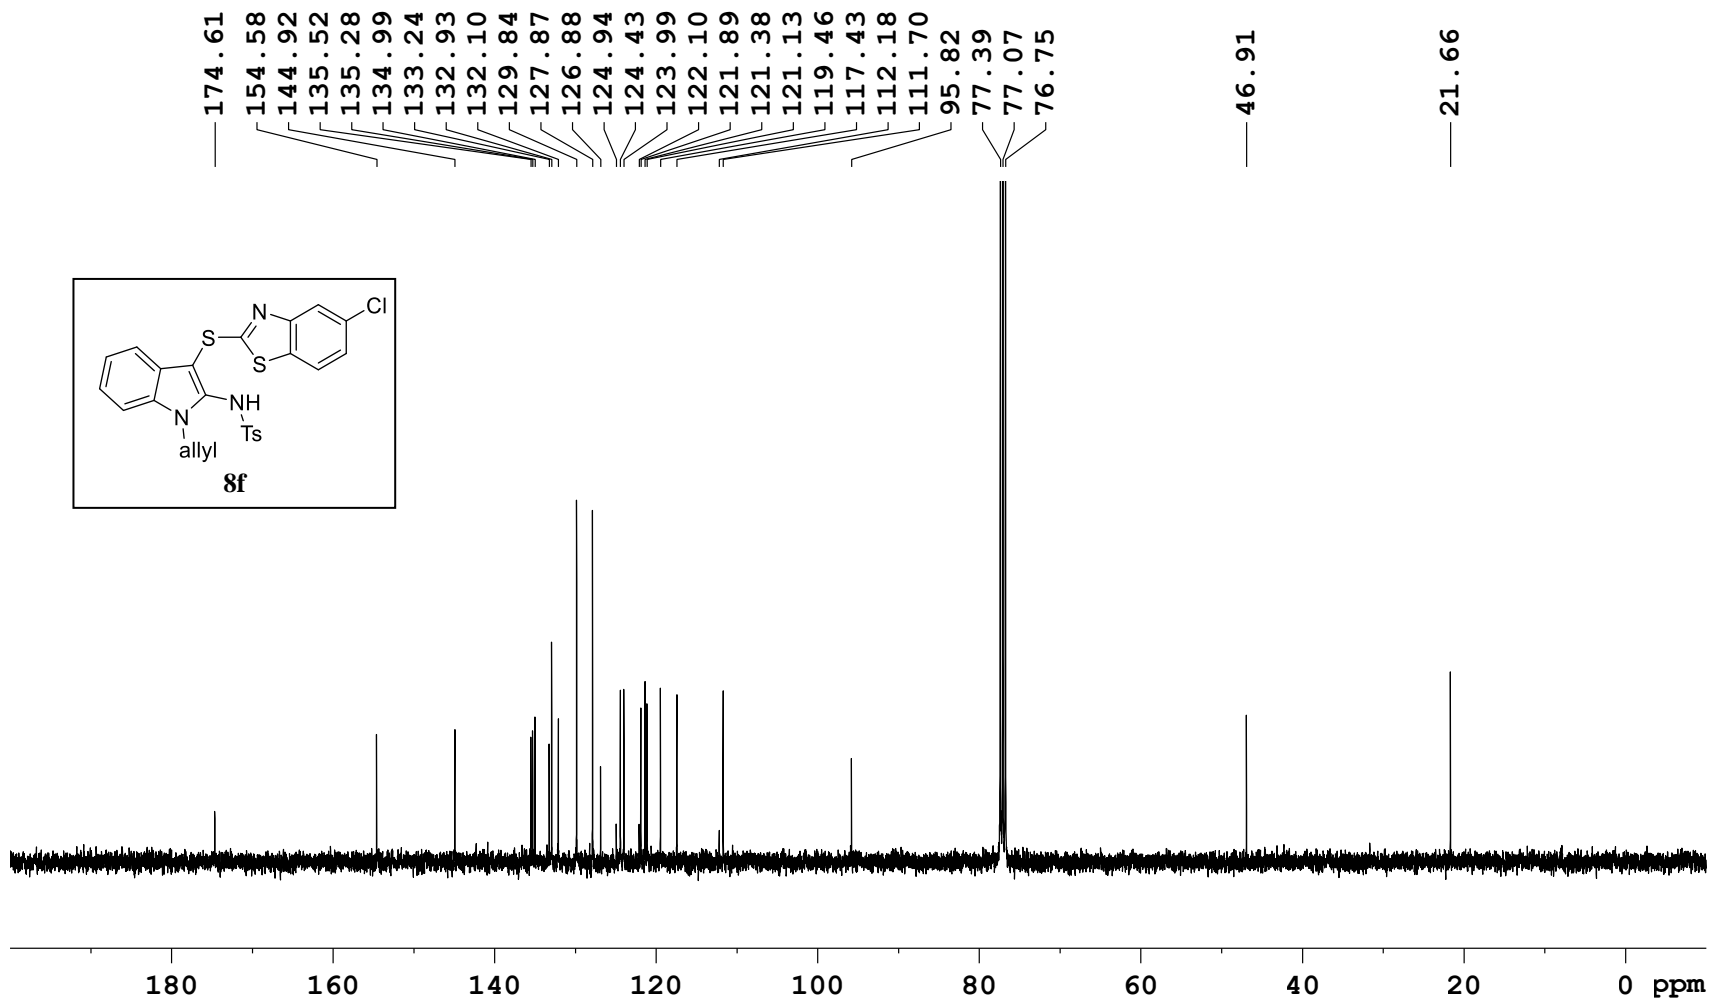

<sup>13</sup>C NMR Spectrum of 8f



1-Ethyl-2-[(4-methylbenzene-1-sulfonyl)methylamino]-1*H*-indol-3-yl *N,N'*-diphenylcarbamimidothioate (**14a**)

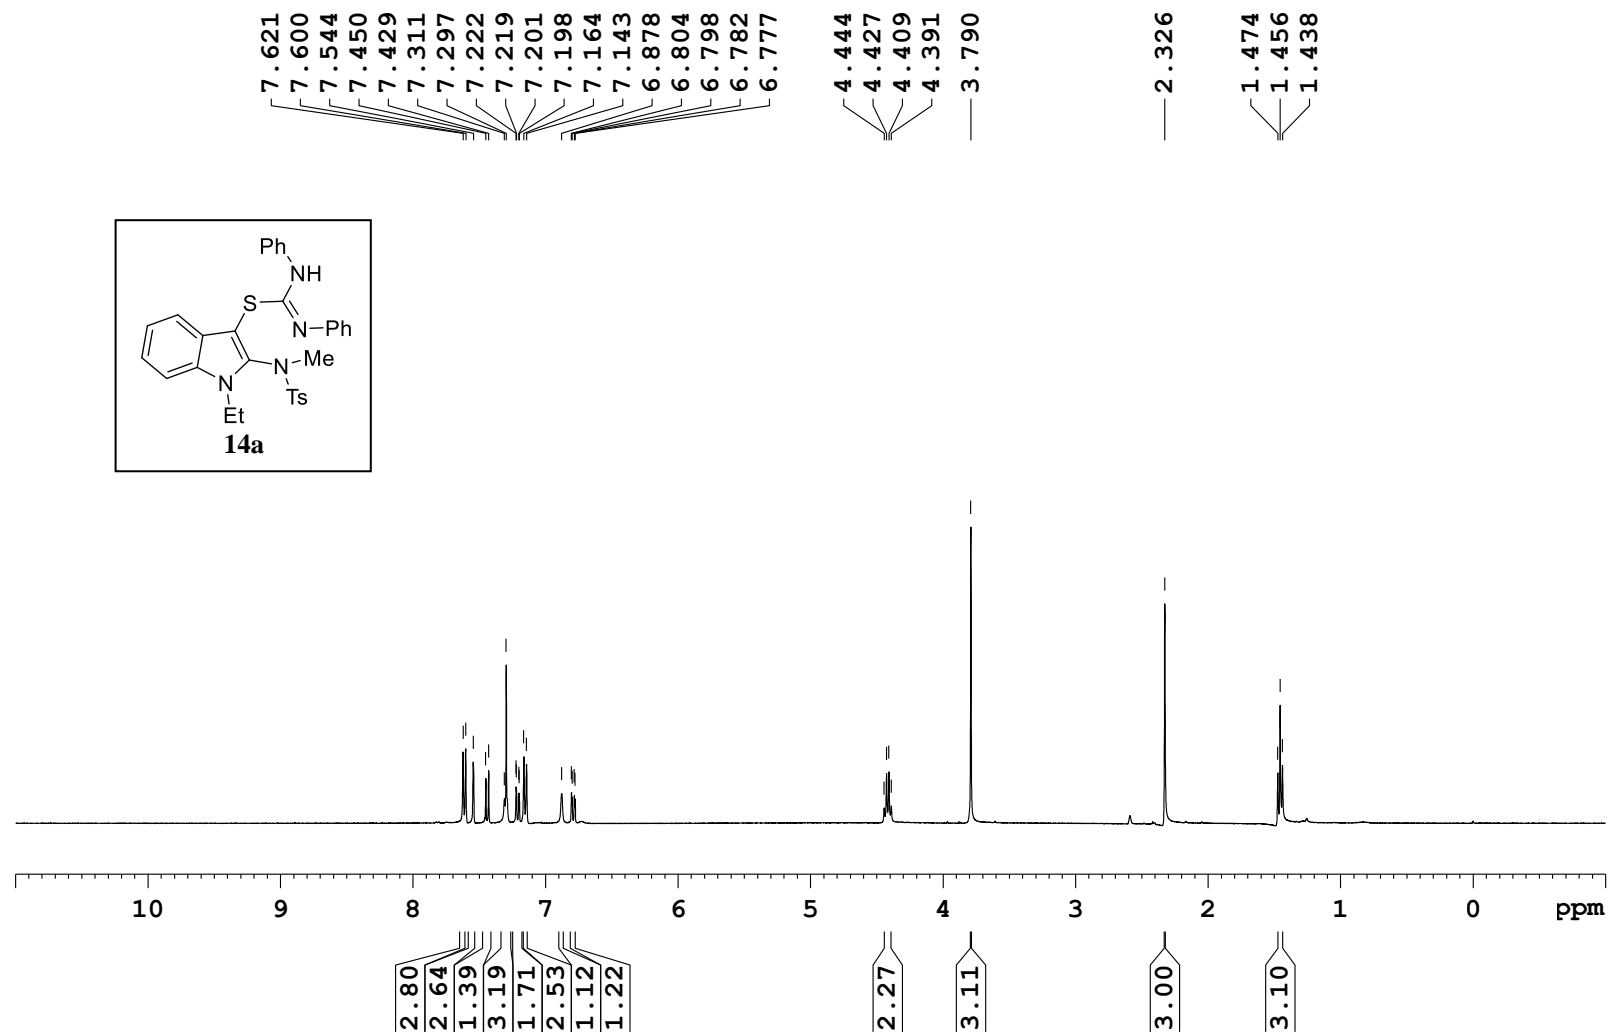

<sup>1</sup>H NMR Spectrum of **14a**

**1-Ethyl-2-[(4-methylbenzene-1-sulfonyl)methylamino]-1*H*-indol-3-yl *N,N'*-diphenylcarbamimidothioate (14a)**

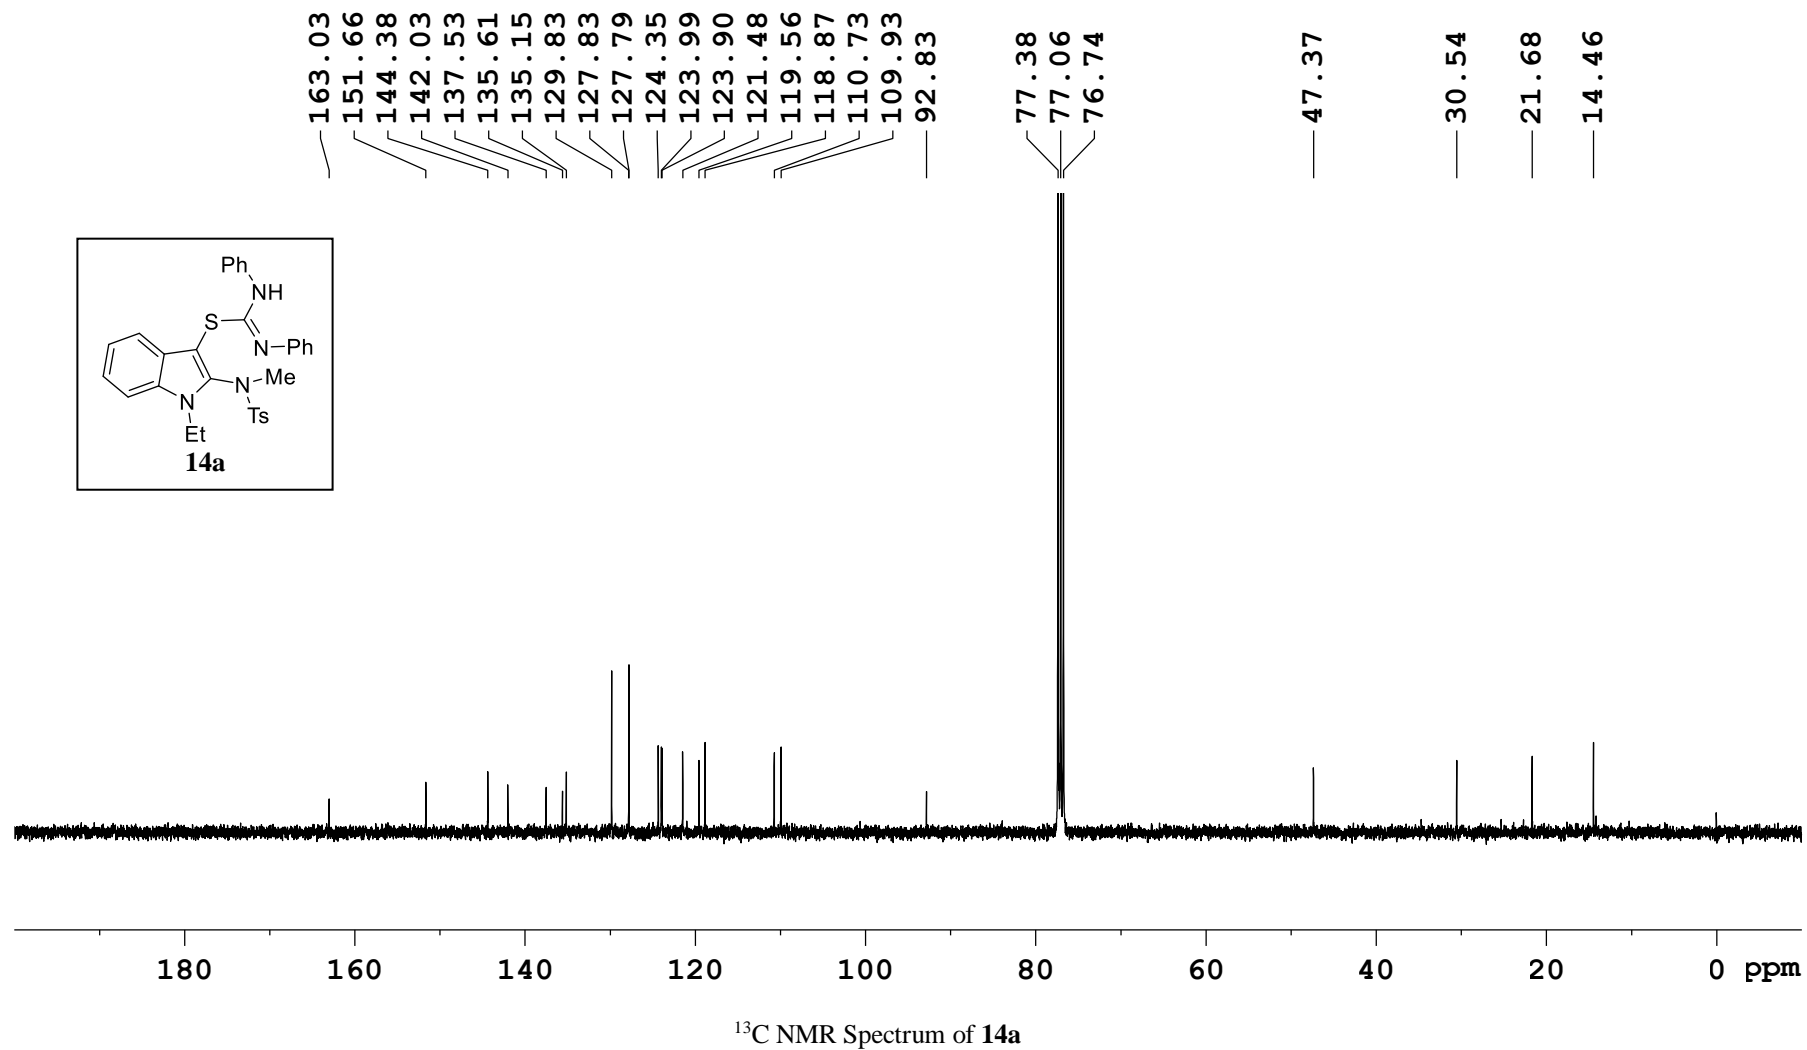

**N-{1-Methyl-3-[(1H-benzo[d]oxazol-2-yl)sulfanyl]-1H-indol-2-yl}-N-ethyl-4-methylbenzenesulfonamide (14b)**

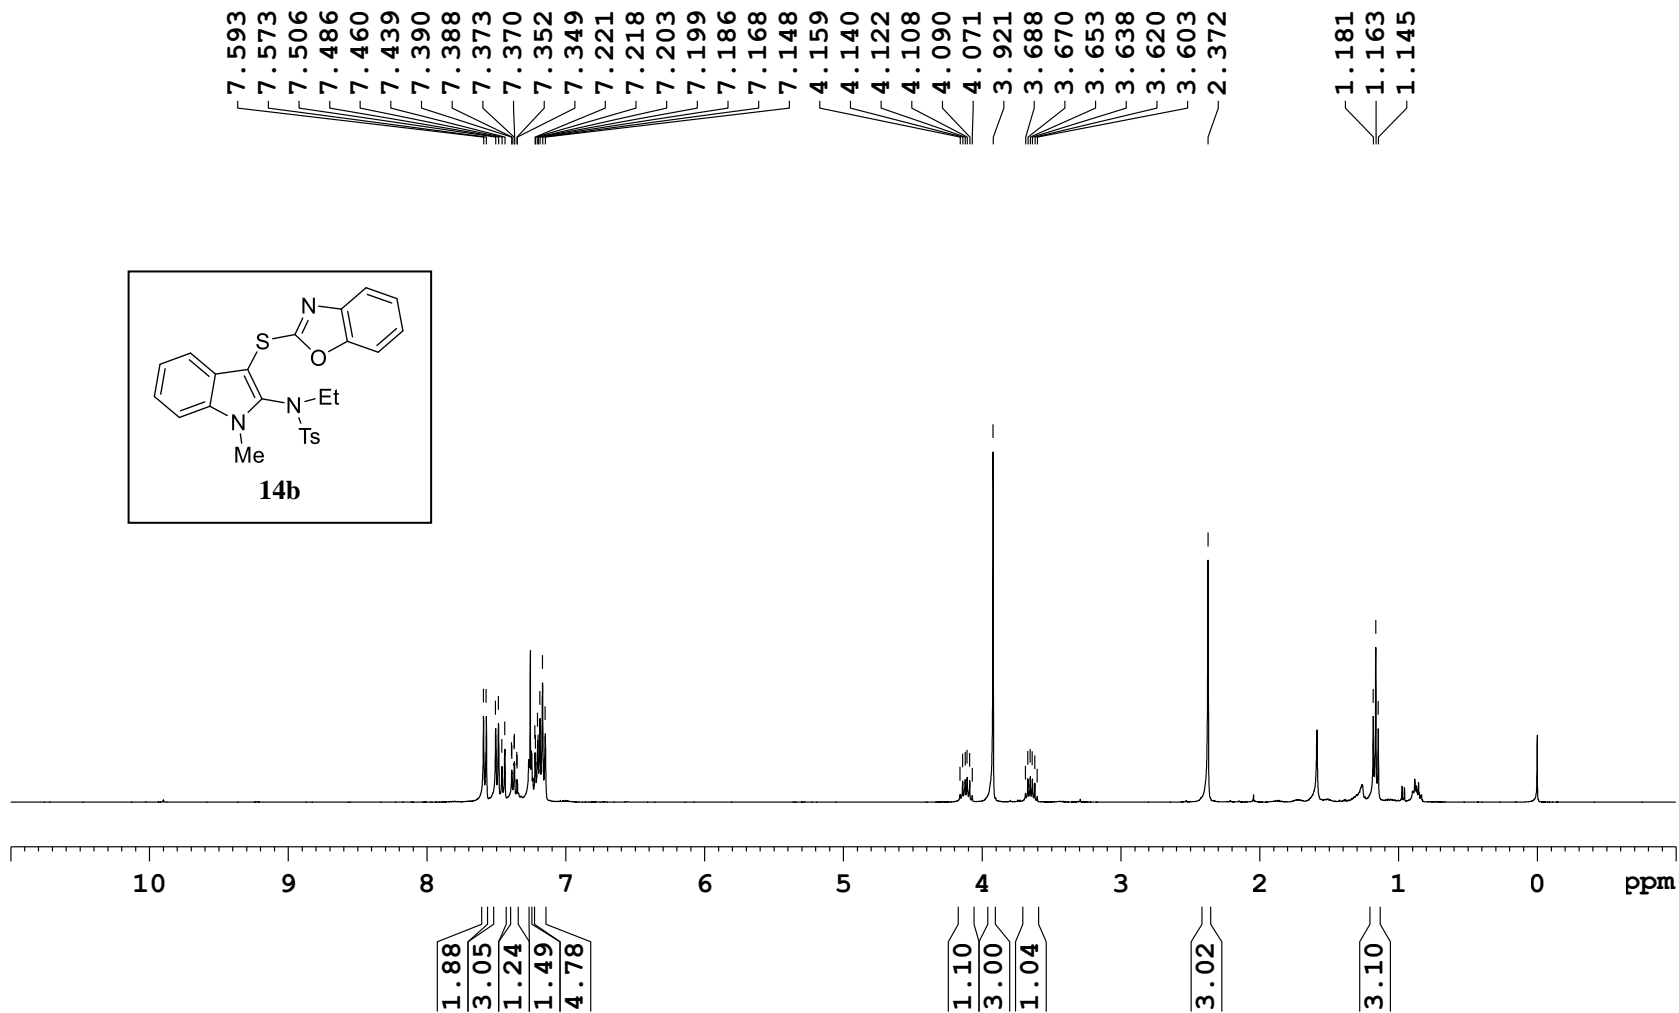

N-{1-Methyl-3-[(1H-benzo[d]oxazol-2-yl)sulfanyl]-1H-indol-2-yl}-N-ethyl-4-methylbenzenesulfonamide (14b)

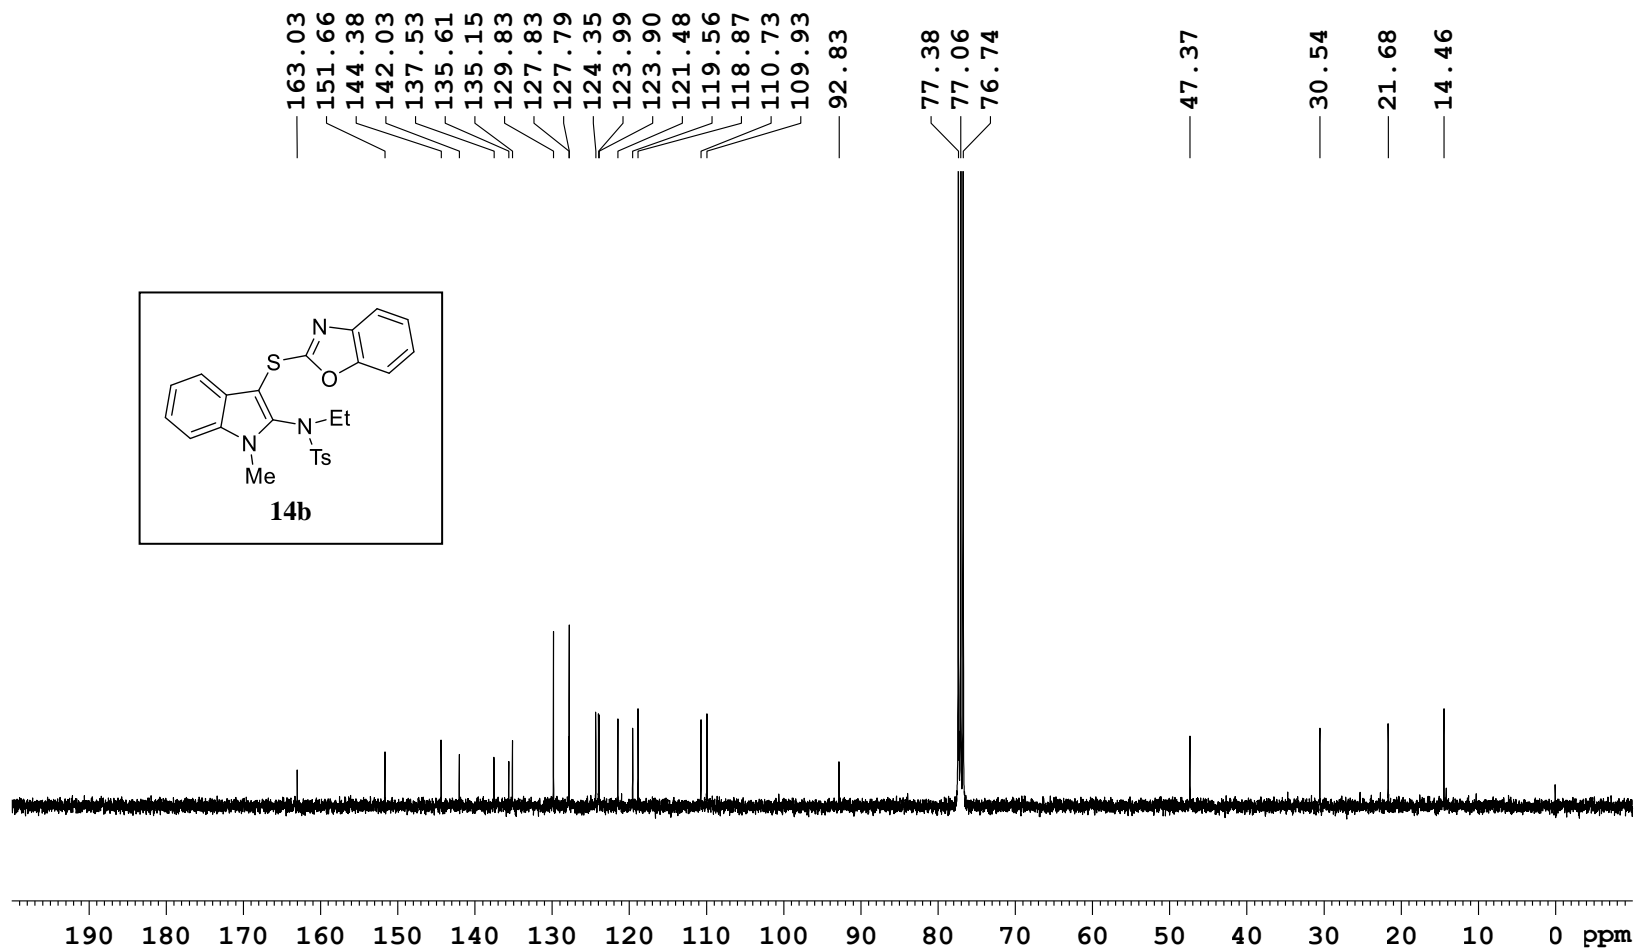

N-{1-Benzyl-3-[(1H-imidazol-2-yl)sulfanyl]-1H-indol-2-yl}-N-benzenecarbonyl-4-methylbenzenesulfonamide (14c)

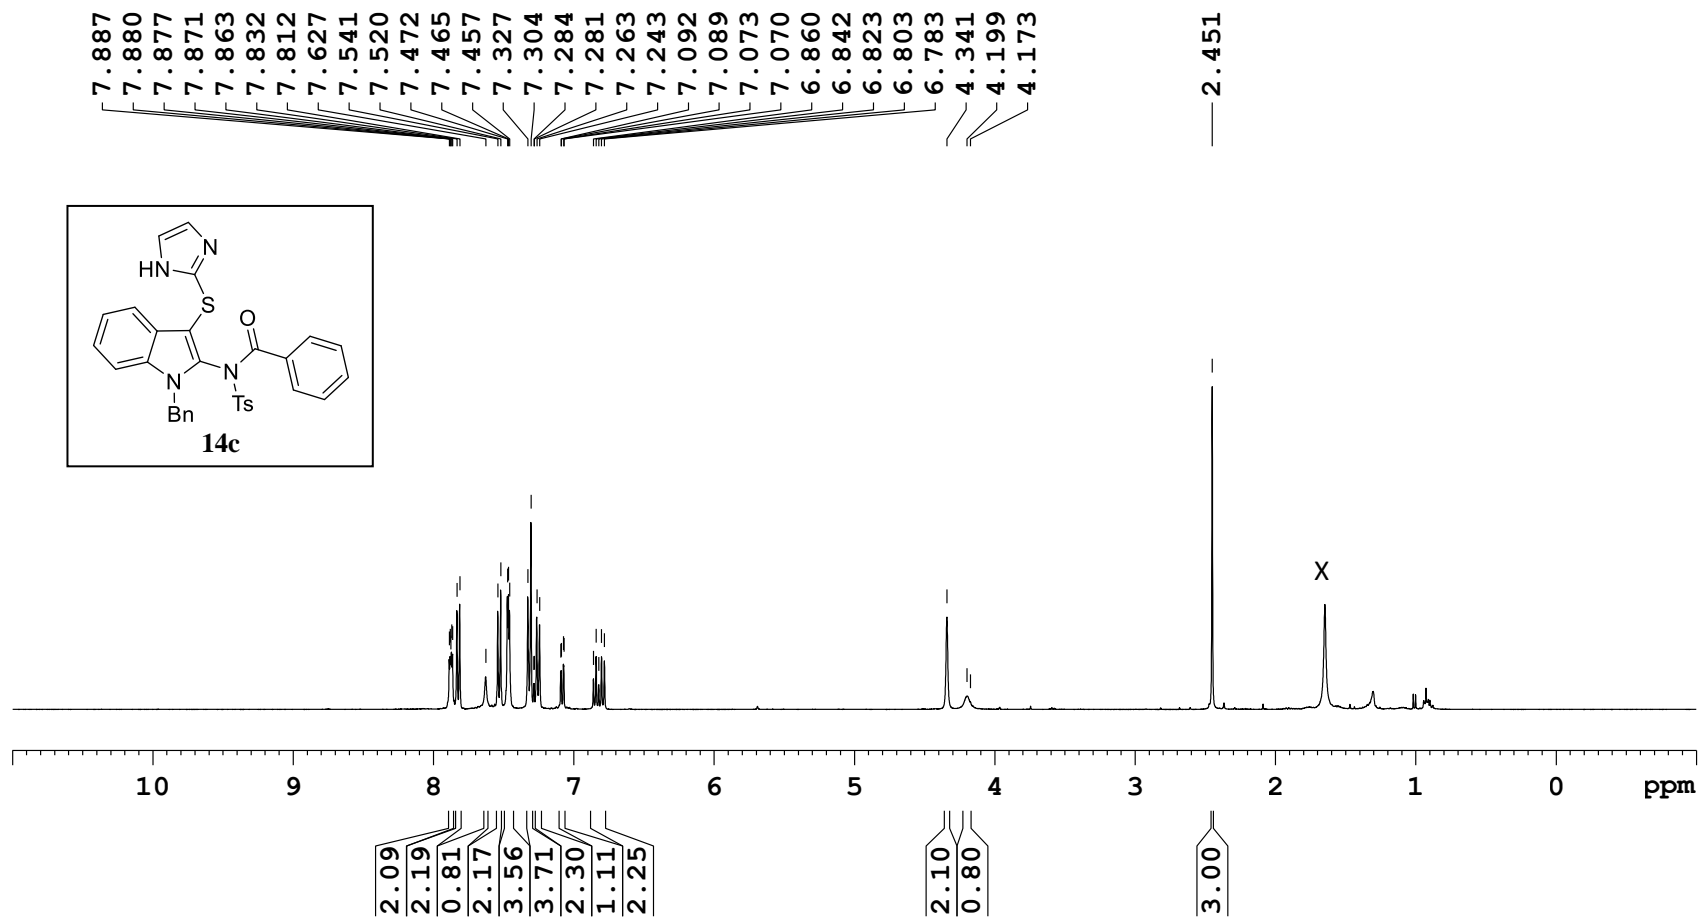

N-{1-Benzyl-3-[(1H-imidazol-2-yl)sulfanyl]-1H-indol-2-yl}-N-benzenecarbonyl-4-methylbenzenesulfonamide (14c)

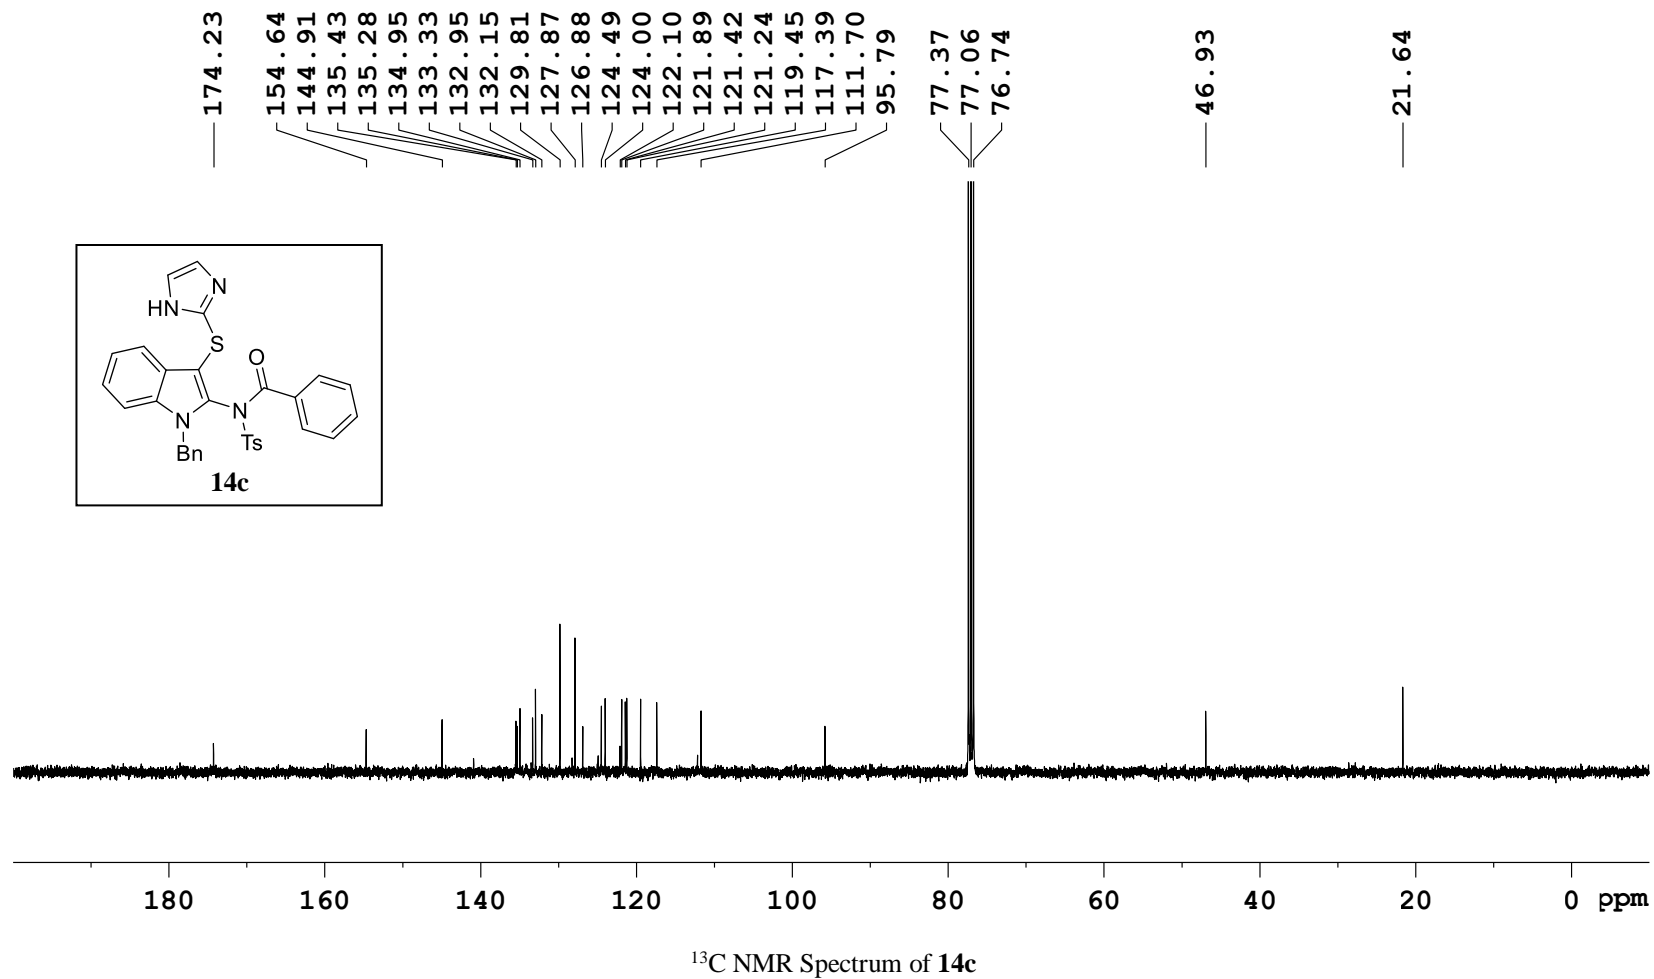

**BF<sub>3</sub>·OEt<sub>2</sub> Catalyzed S-H insertion reactions of  
α-diazoimidamides and enolizablethioamides under metal-free conditions**

**Supporting Information**

**HRMS spectra**

1. Spectral data for 3-carbamimidothioates **3a-i** S2
2. Spectral data for carbamimidothioates **6a-m** S11
3. Spectral data for carbamimidothioates **8a-f** S24
4. Spectral data for alkylated and acylated  
carbamimidothioates **14a-c** S30

**1-Methyl-2-[(4-methylbenzene-1-sulfonyl)amino]-1*H*-indol-3-yl *N,N'*-diethylcarbamimidothioate (3a)**

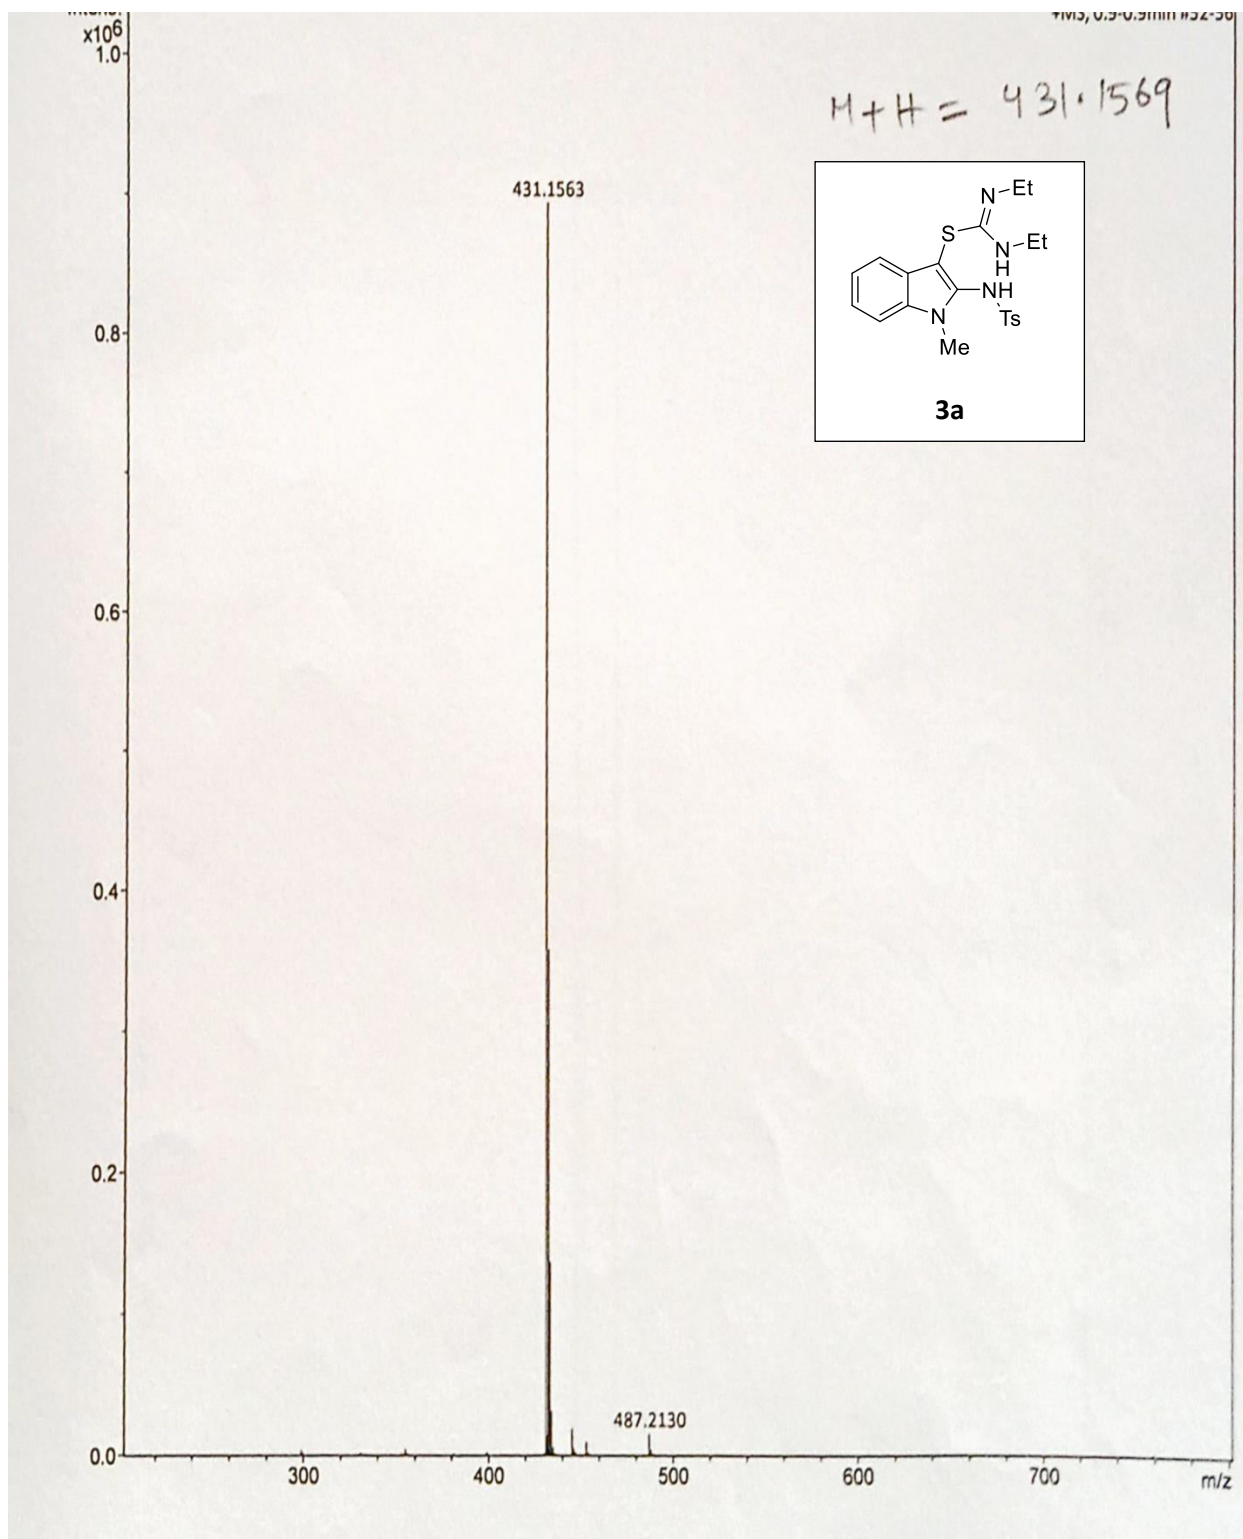



**1-Ethyl-2-[(4-methylbenzene-1-sulfonyl)amino]-5-methoxy-1*H*-indol-3-yl *N,N'*-diethylcarbamimidothioate (3b)**

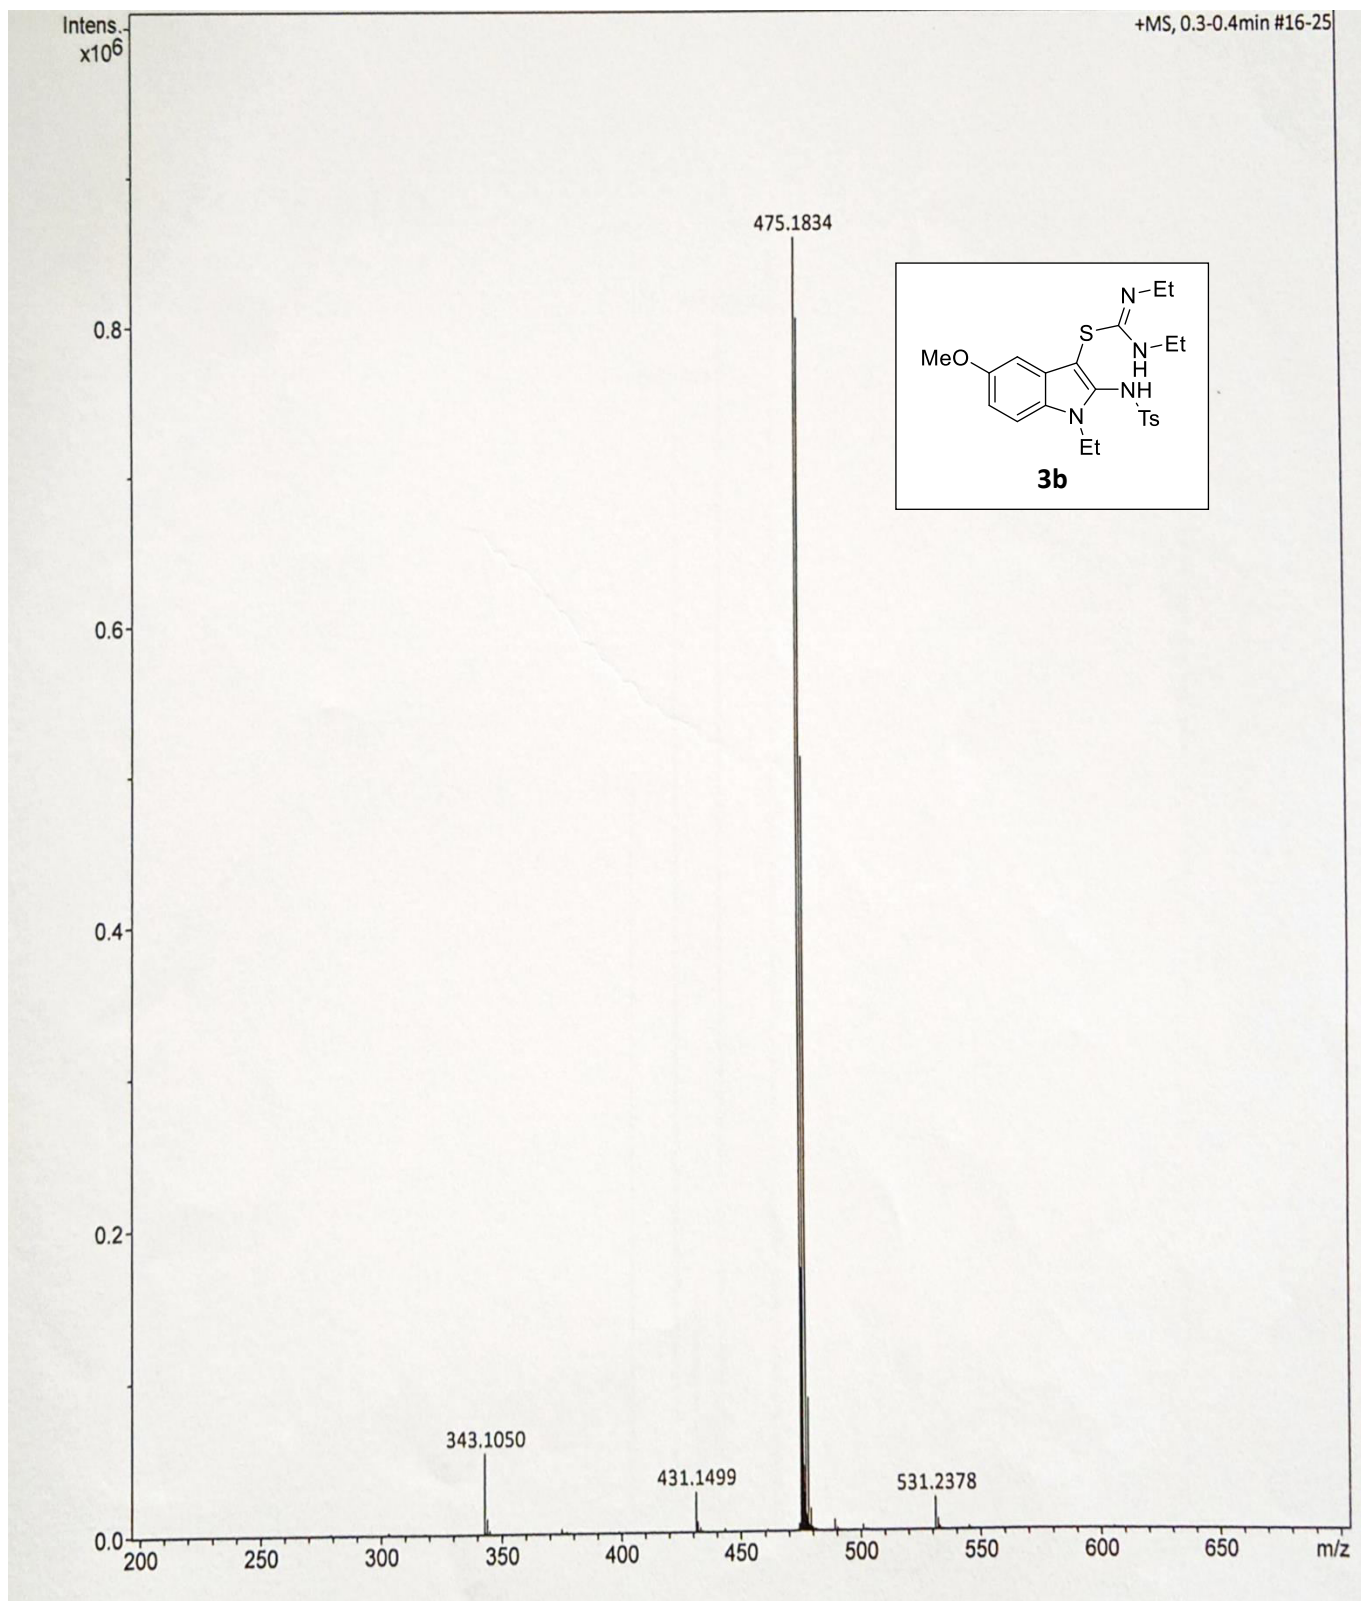

**1-Allyl-2-[(4-methylbenzene-1-sulfonyl)amino]-1*H*-indol-3-yl *N,N'*-dibutylcarbamimidothioate (3c)**

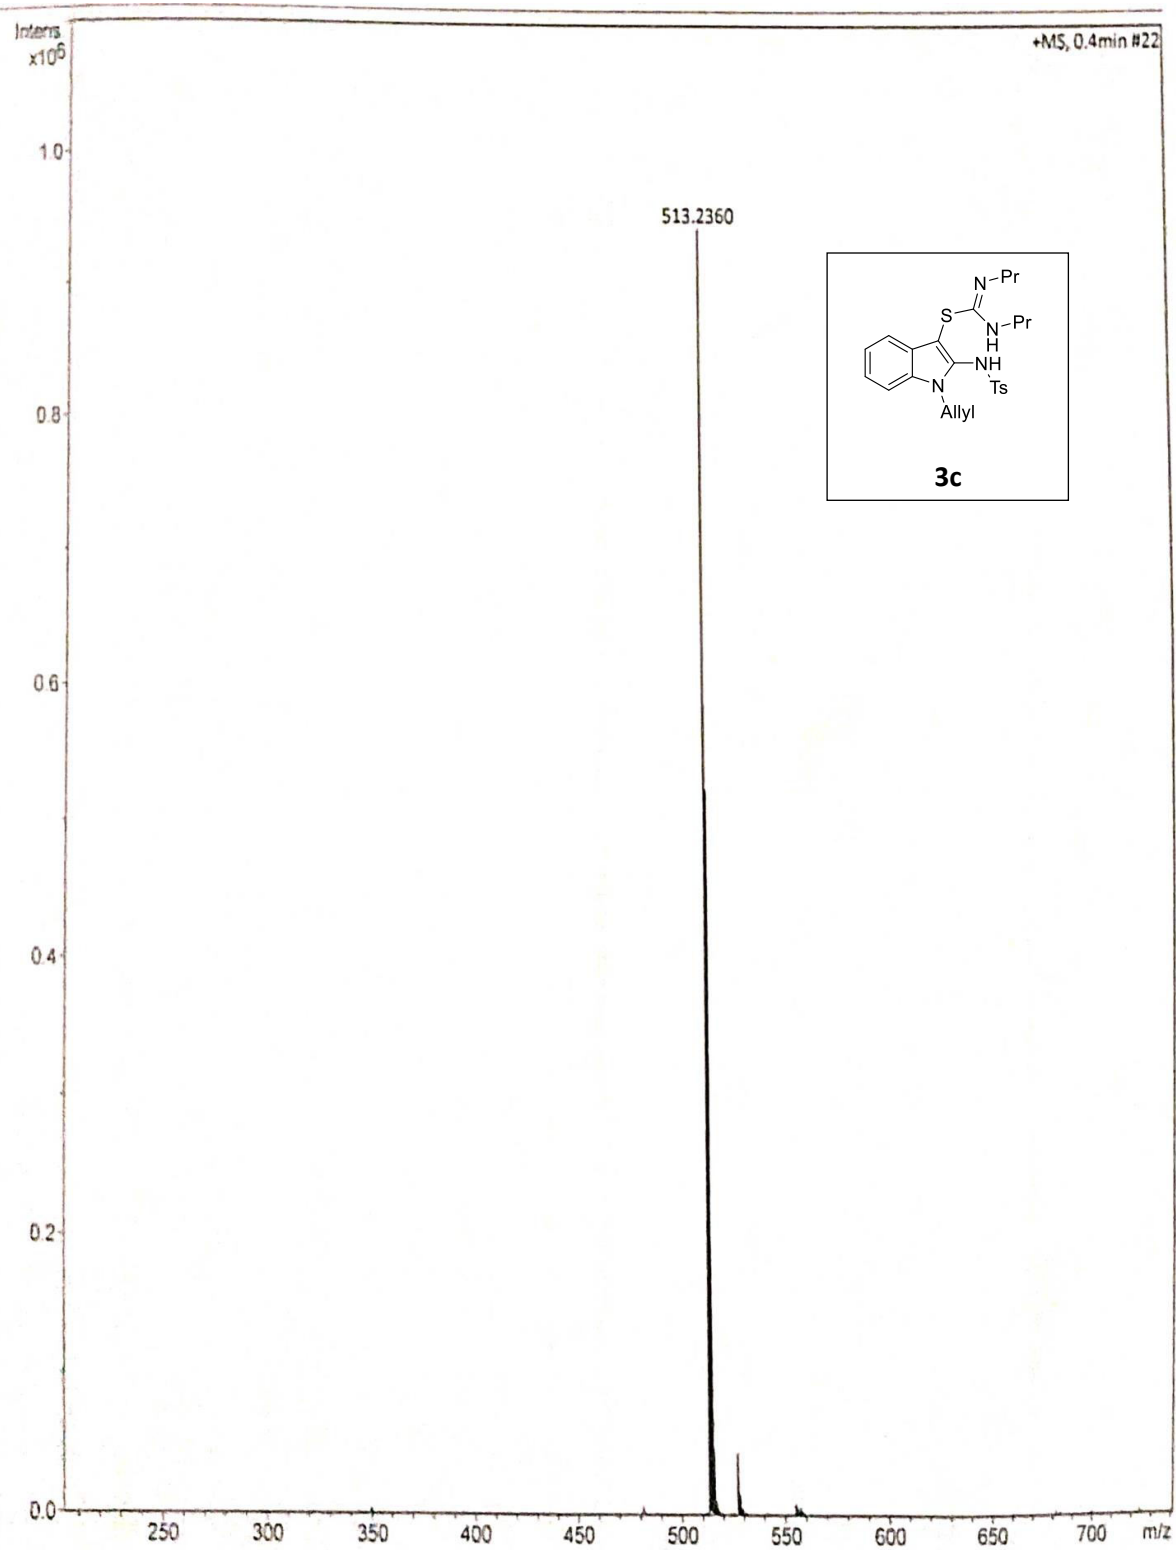

**1-Ethyl-2-[(4-methylbenzene-1-sulfonyl)amino]-1*H*-indol-3-yl *N,N'*-diphenylcarbamimidothioate (3d)**

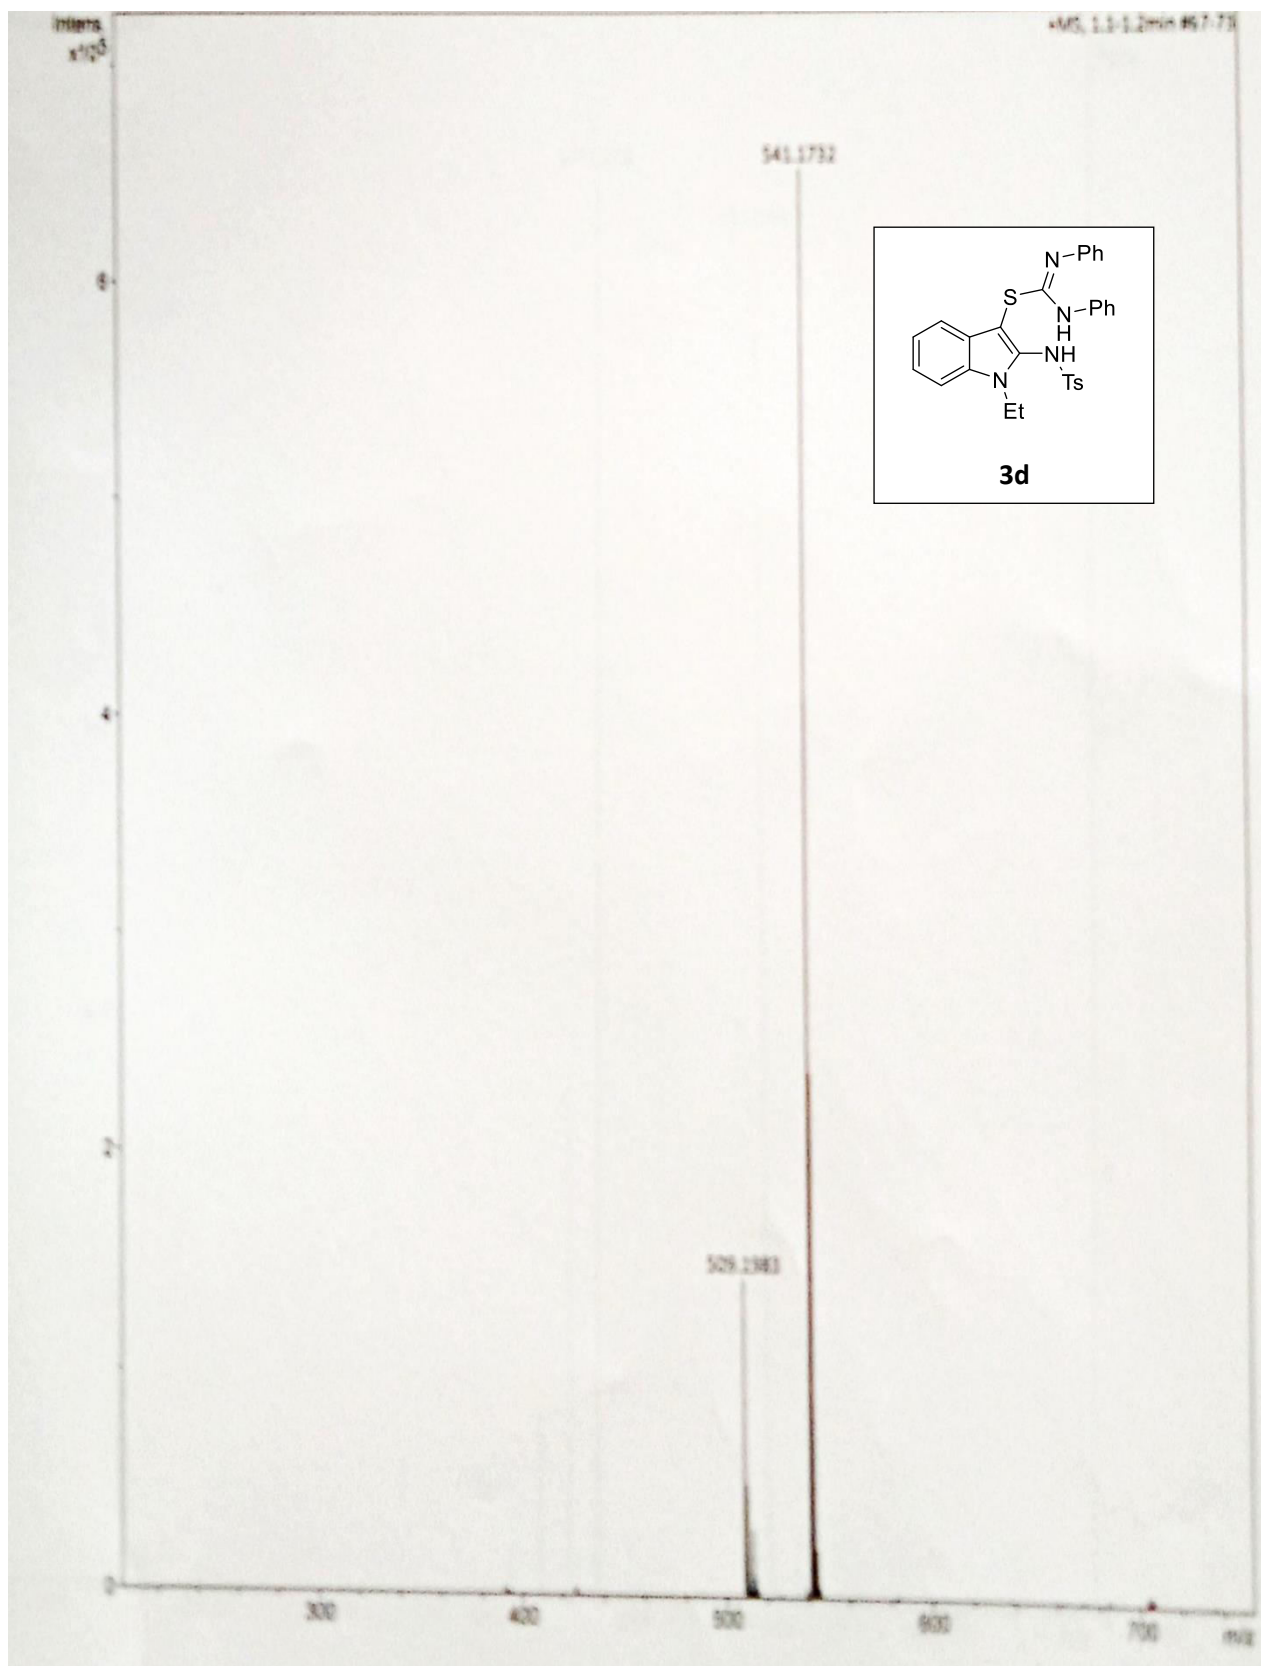

**1-Benzyl-2-[(4-methylbenzene-1-sulfonyl)amino]-1*H*-indol-3-yl *N,N'*-dimethylcarbamimidothioate (3e)**

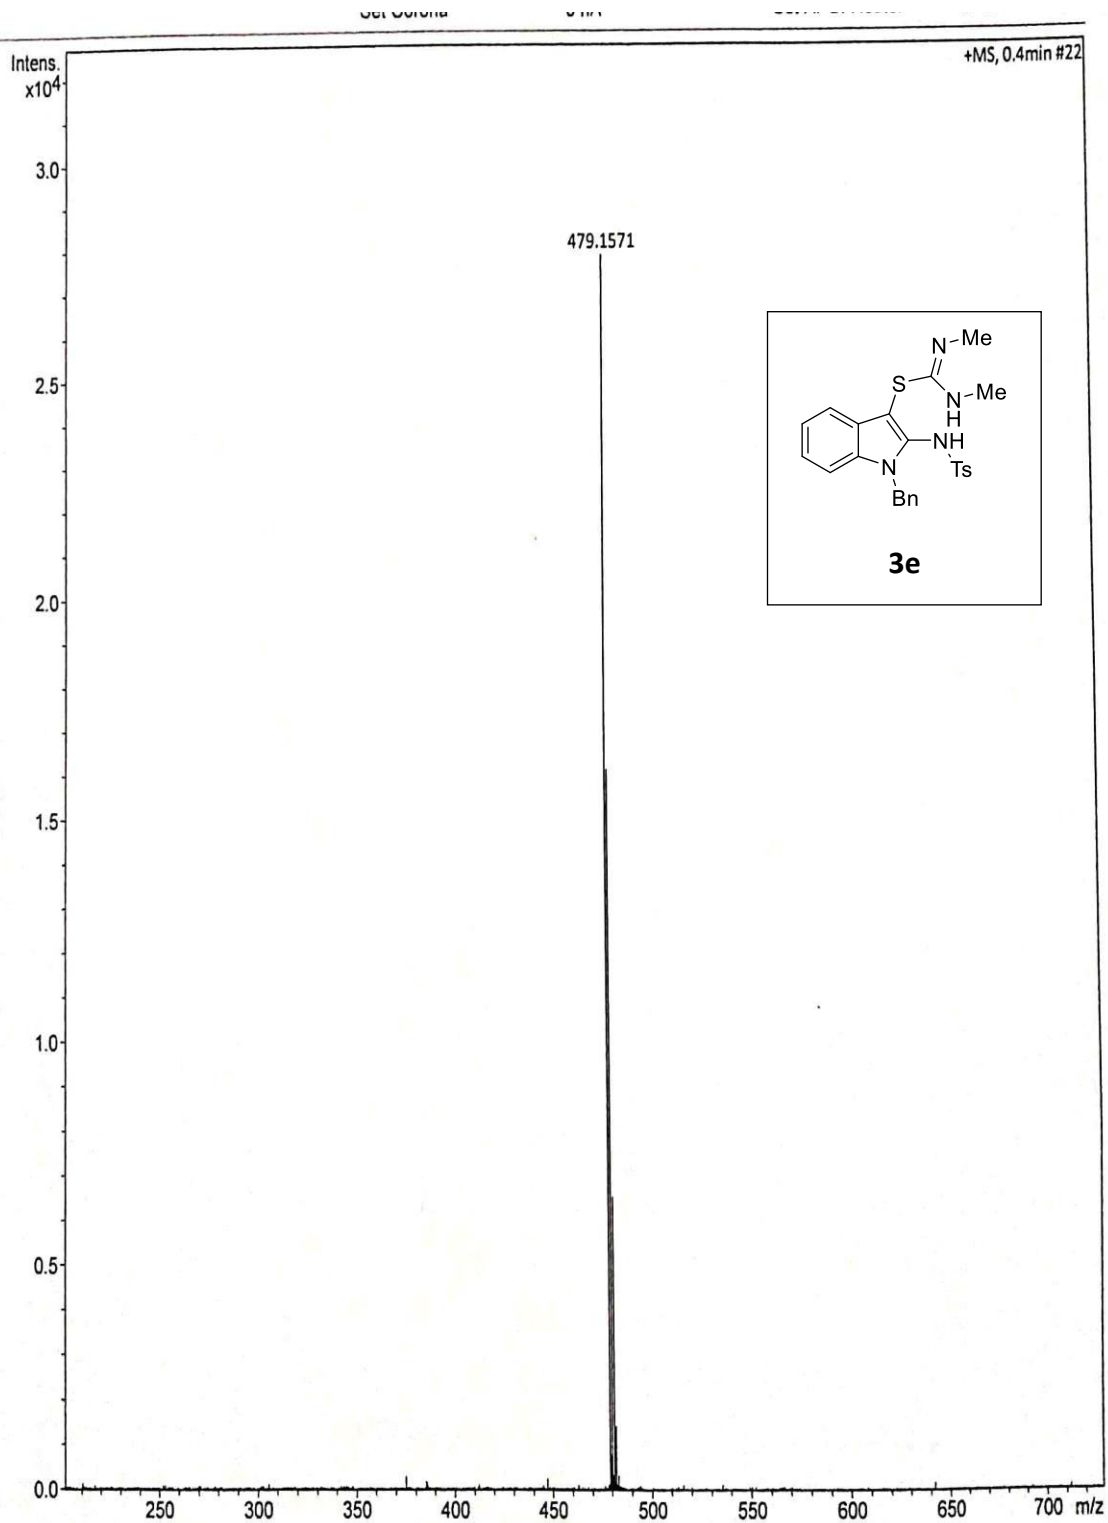

**1-Methyl-2-[(4-methylbenzene-1-sulfonyl)amino]-1*H*-indol-3-yl *N,N'*-dimethylcarbamimidothioate (3f)**

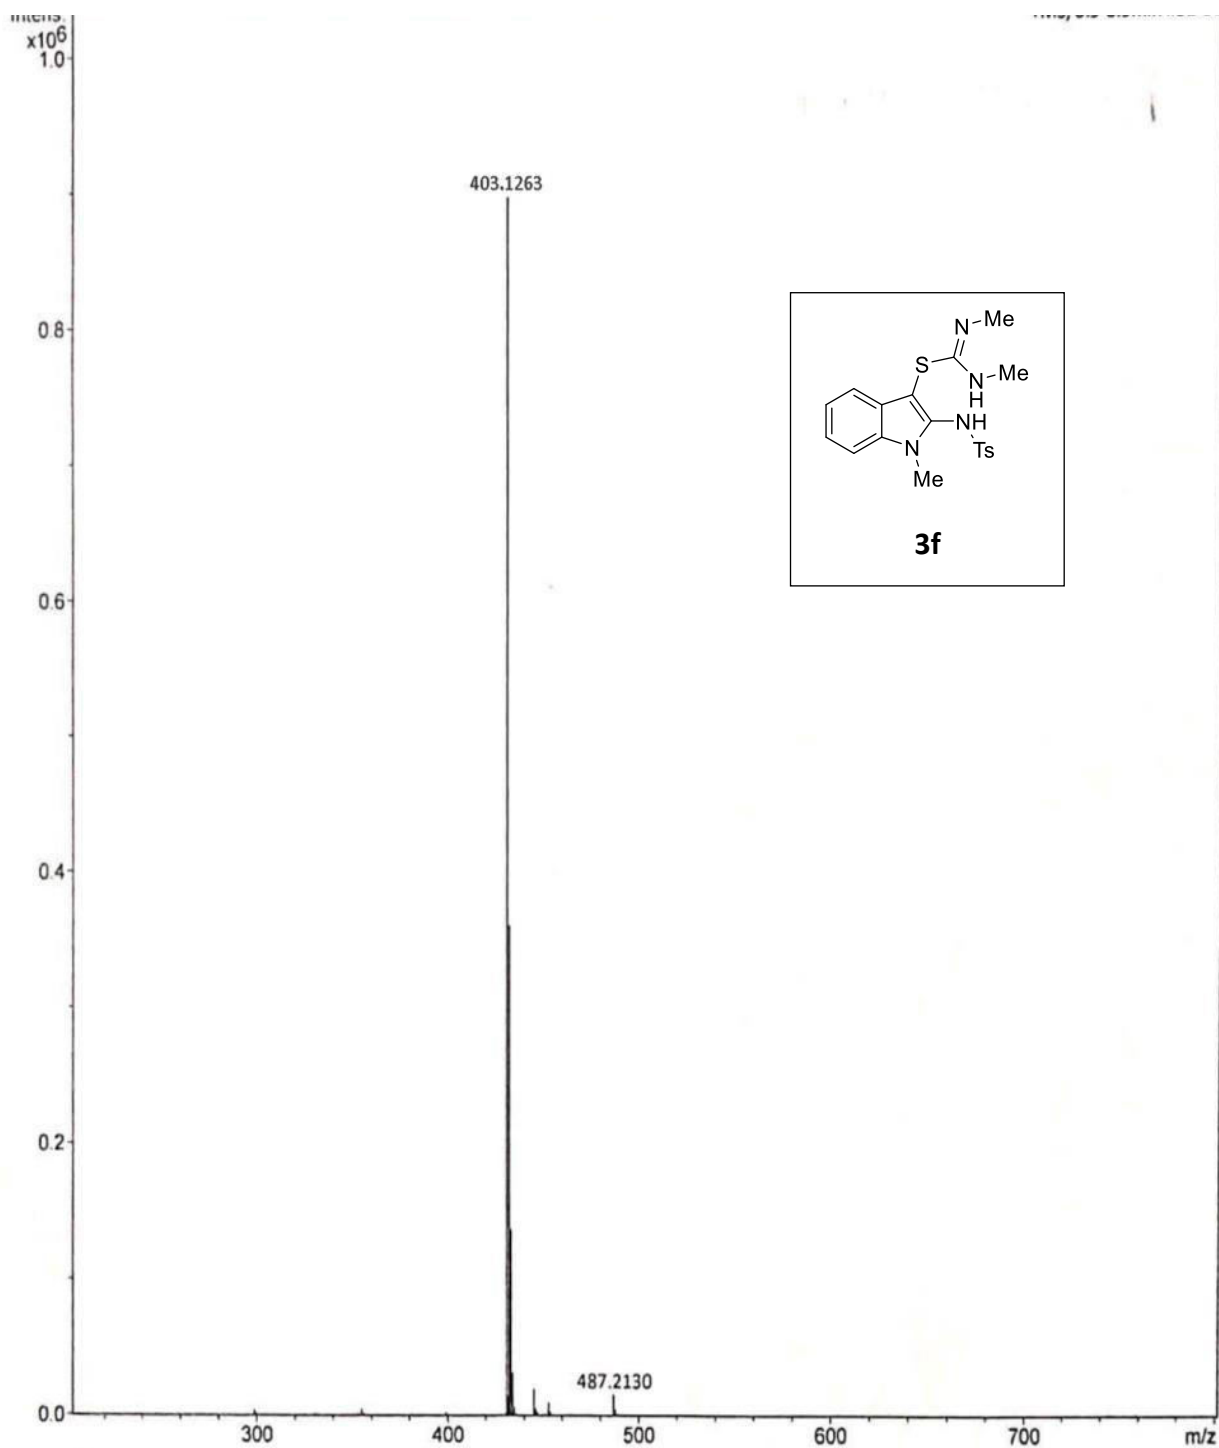

**1-Ethyl-2-[(4-methylbenzene-1-sulfonyl)amino]-5-bromo-1H-indol-3-yl *N,N'*-dibutylcarbamimidothioate (3g)**

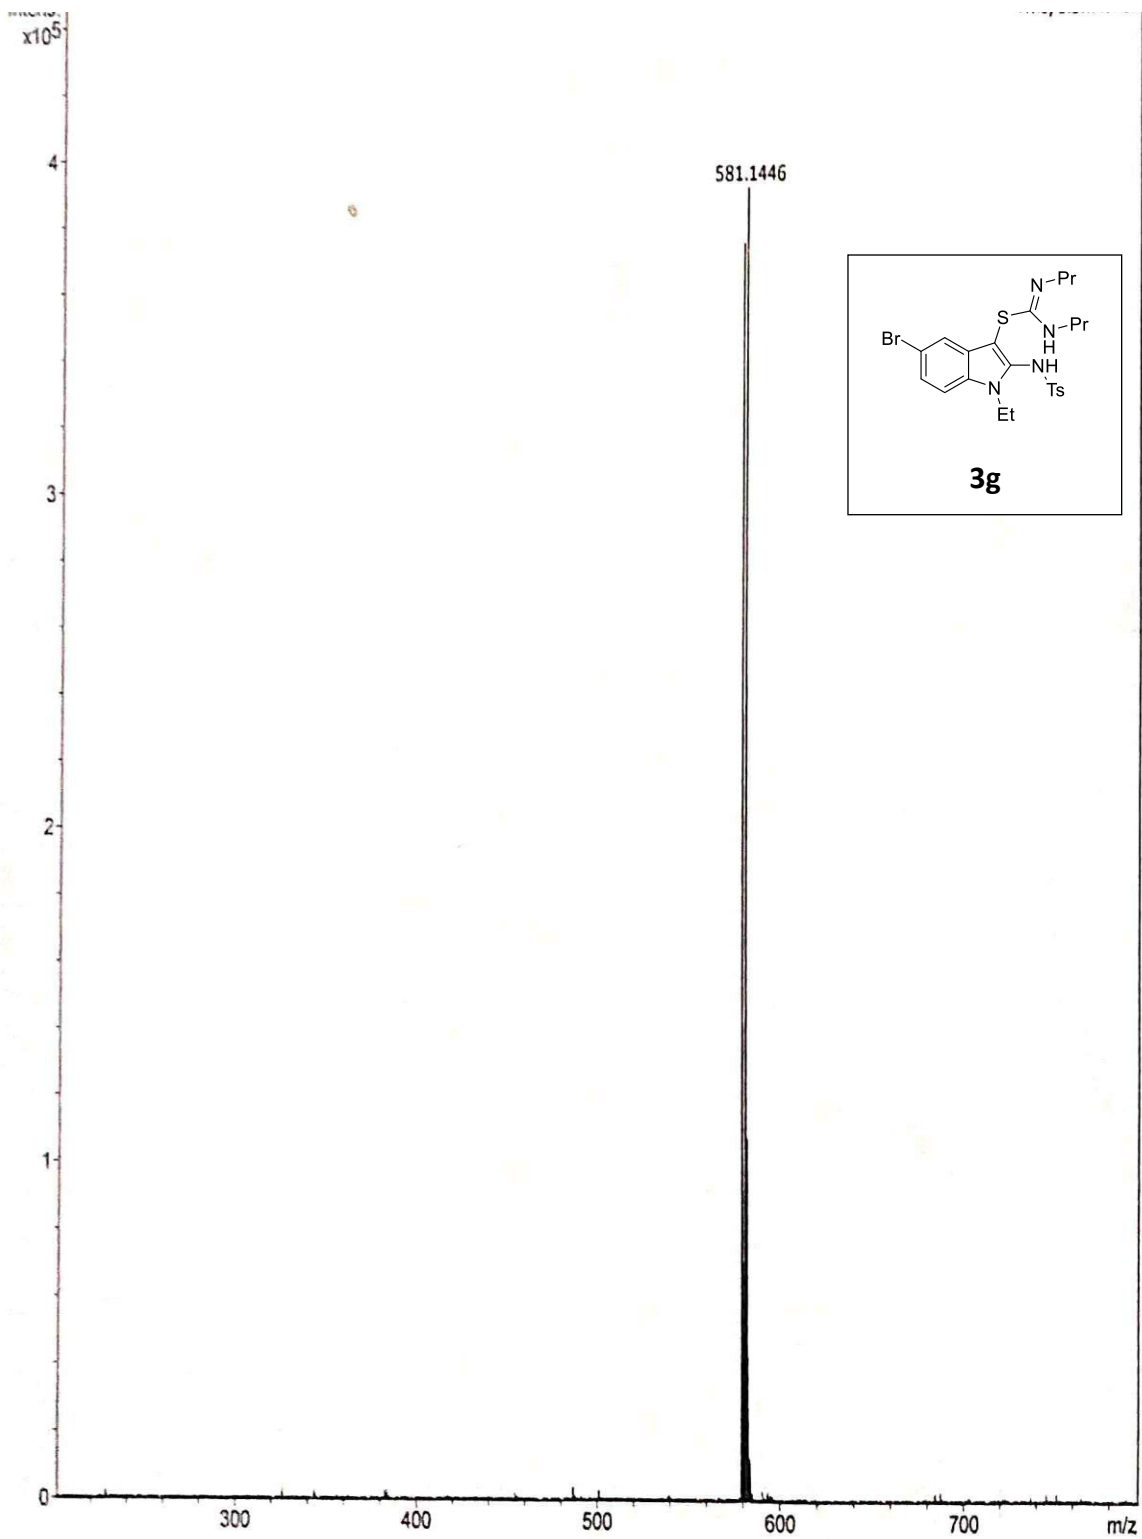

**1-Allyl-2-[(4-methylbenzene-1-sulfonyl)amino]-1*H*-indol-3-yl *N*,  
methylcarbamimidothioate (3h)**

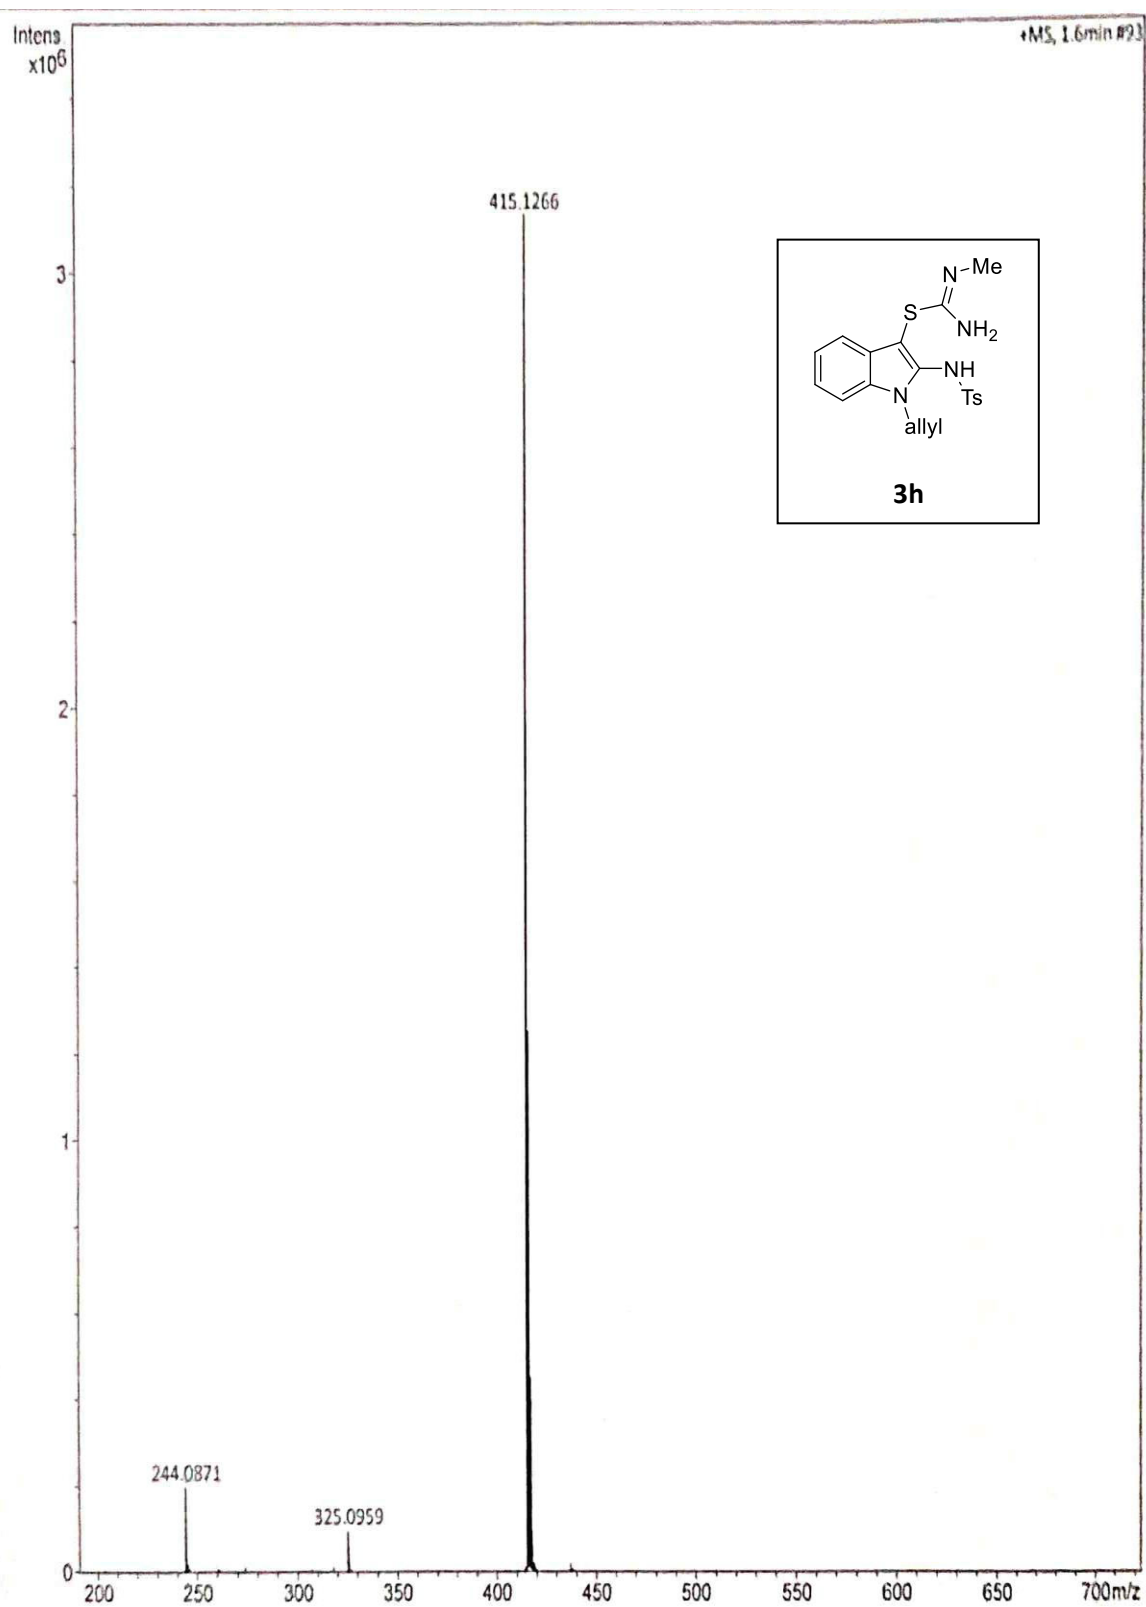

**1-Benzyl-2-[(4-methylbenzene-1-sulfonyl)amino]]-6-bromo-1*H*-indol-3-yl *N*-allylcarbamimidothioate (**3i**)**

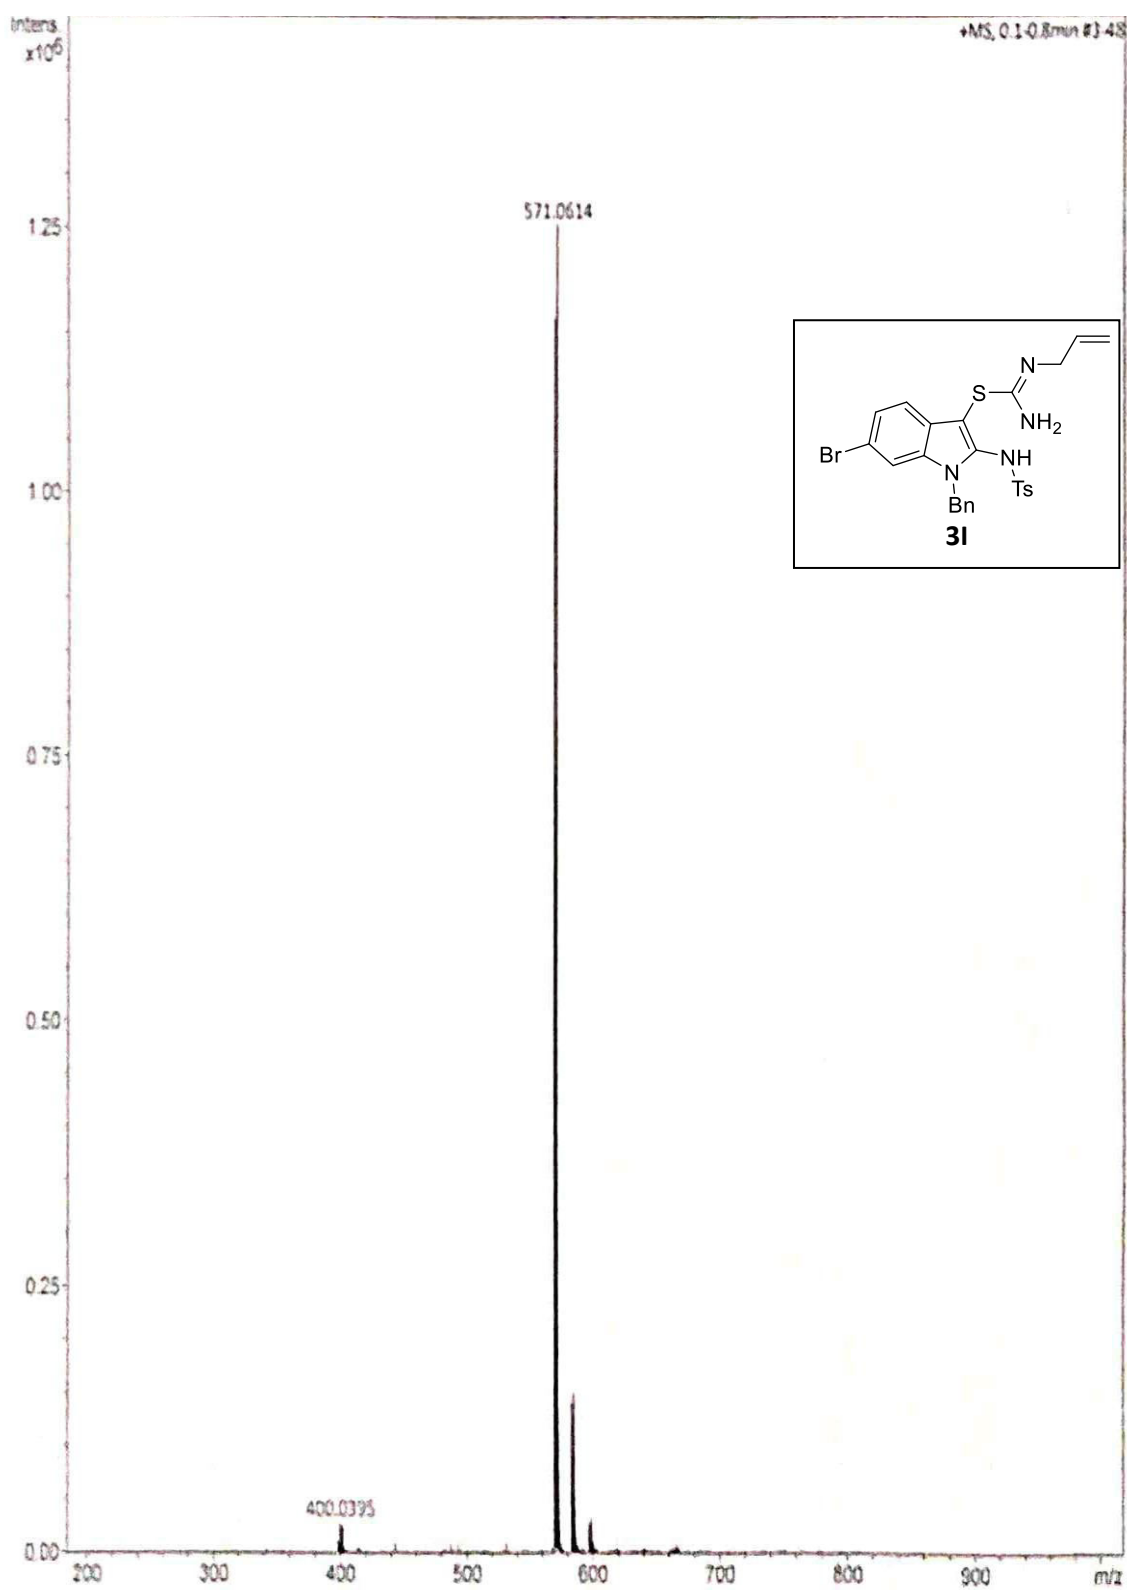



1-Methyl-2-[(4-methylbenzene-1-sulfonyl)amino]-1*H*-indol-3-yl(2*E*)-*N*-methyl-2-[(phenyl)methylidene]hydrazine-1-carboximidothioate (6a)

D:\January-2020-Onwards\RFM-135

11/24/20 19:53:26

RFM-135 #59 RT: 0.57 AV: 1 NL: 1.54E8  
T: FTMS + p ESI Full ms [100.0000-1000.0000]

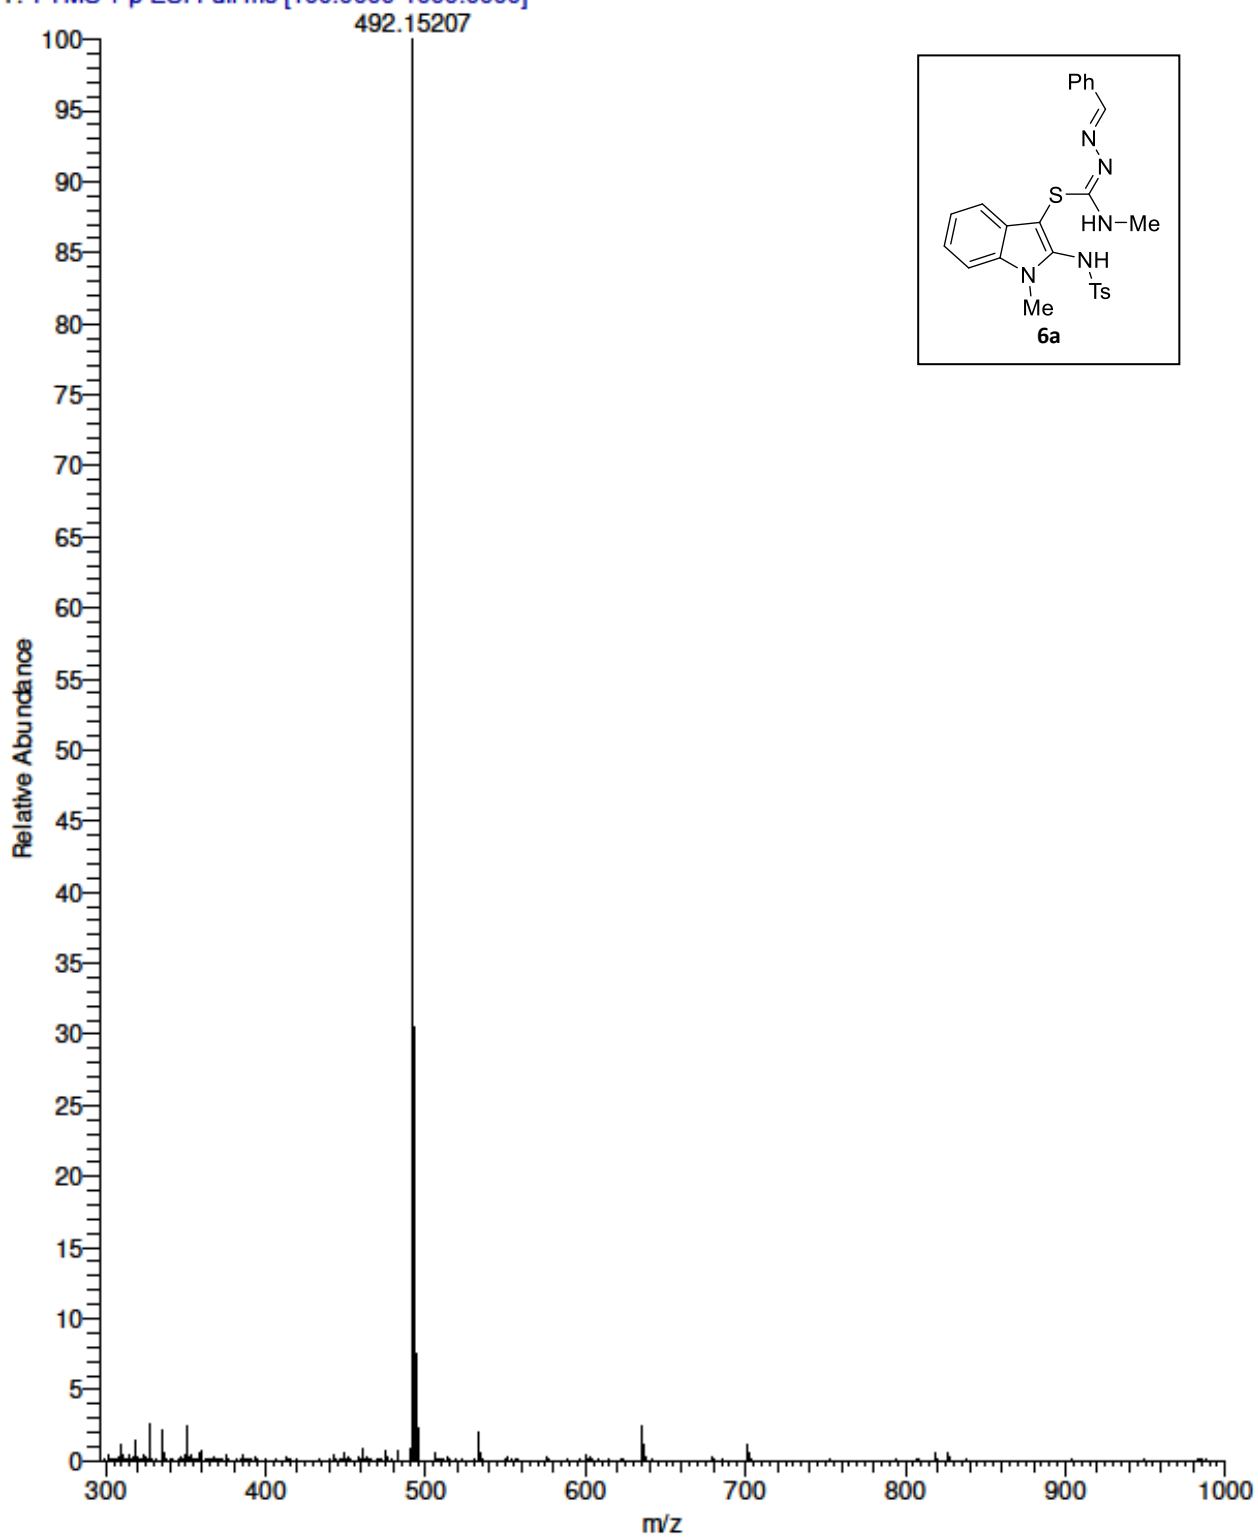

**1-Ethyl-2-[(4-methylbenzene-1-sulfonyl)amino]-1*H*-indol-3-yl(2*E*)-*N*-methyl-2-[(4-methylphenyl)methylidene]hydrazine-1-carboximidothioate (6b)**

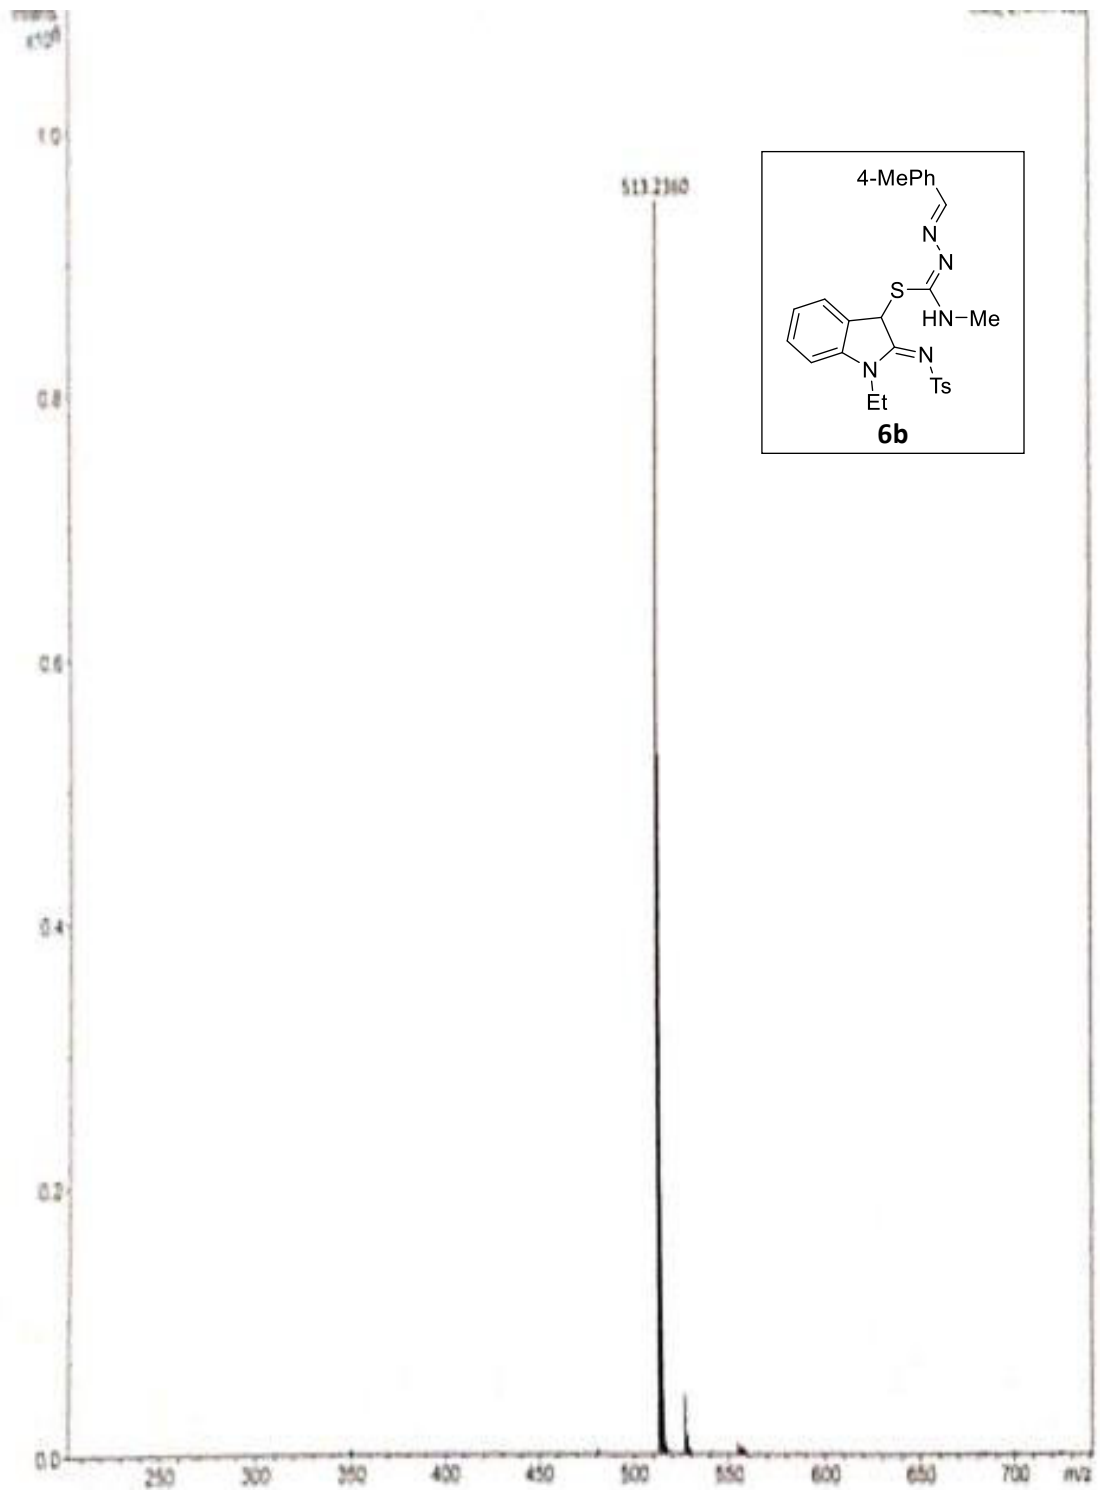

1-Methyl-2-[(4-methylbenzene-1-sulfonyl)amino]-1*H*-indol-3-yl(2*E*)-*N*-methyl-2-[(4-methylphenyl)methylidene]hydrazine-1-carboximidothioate (**6c**)

D:\January-2020-Onwards\RFM-121-A

09/17/20 13:54:29

RFM-121-A #51 RT: 0.51 AV: 1 NL: 1.16E9

T: FTMS + p ESI Full ms [100.0000-1000.0000]

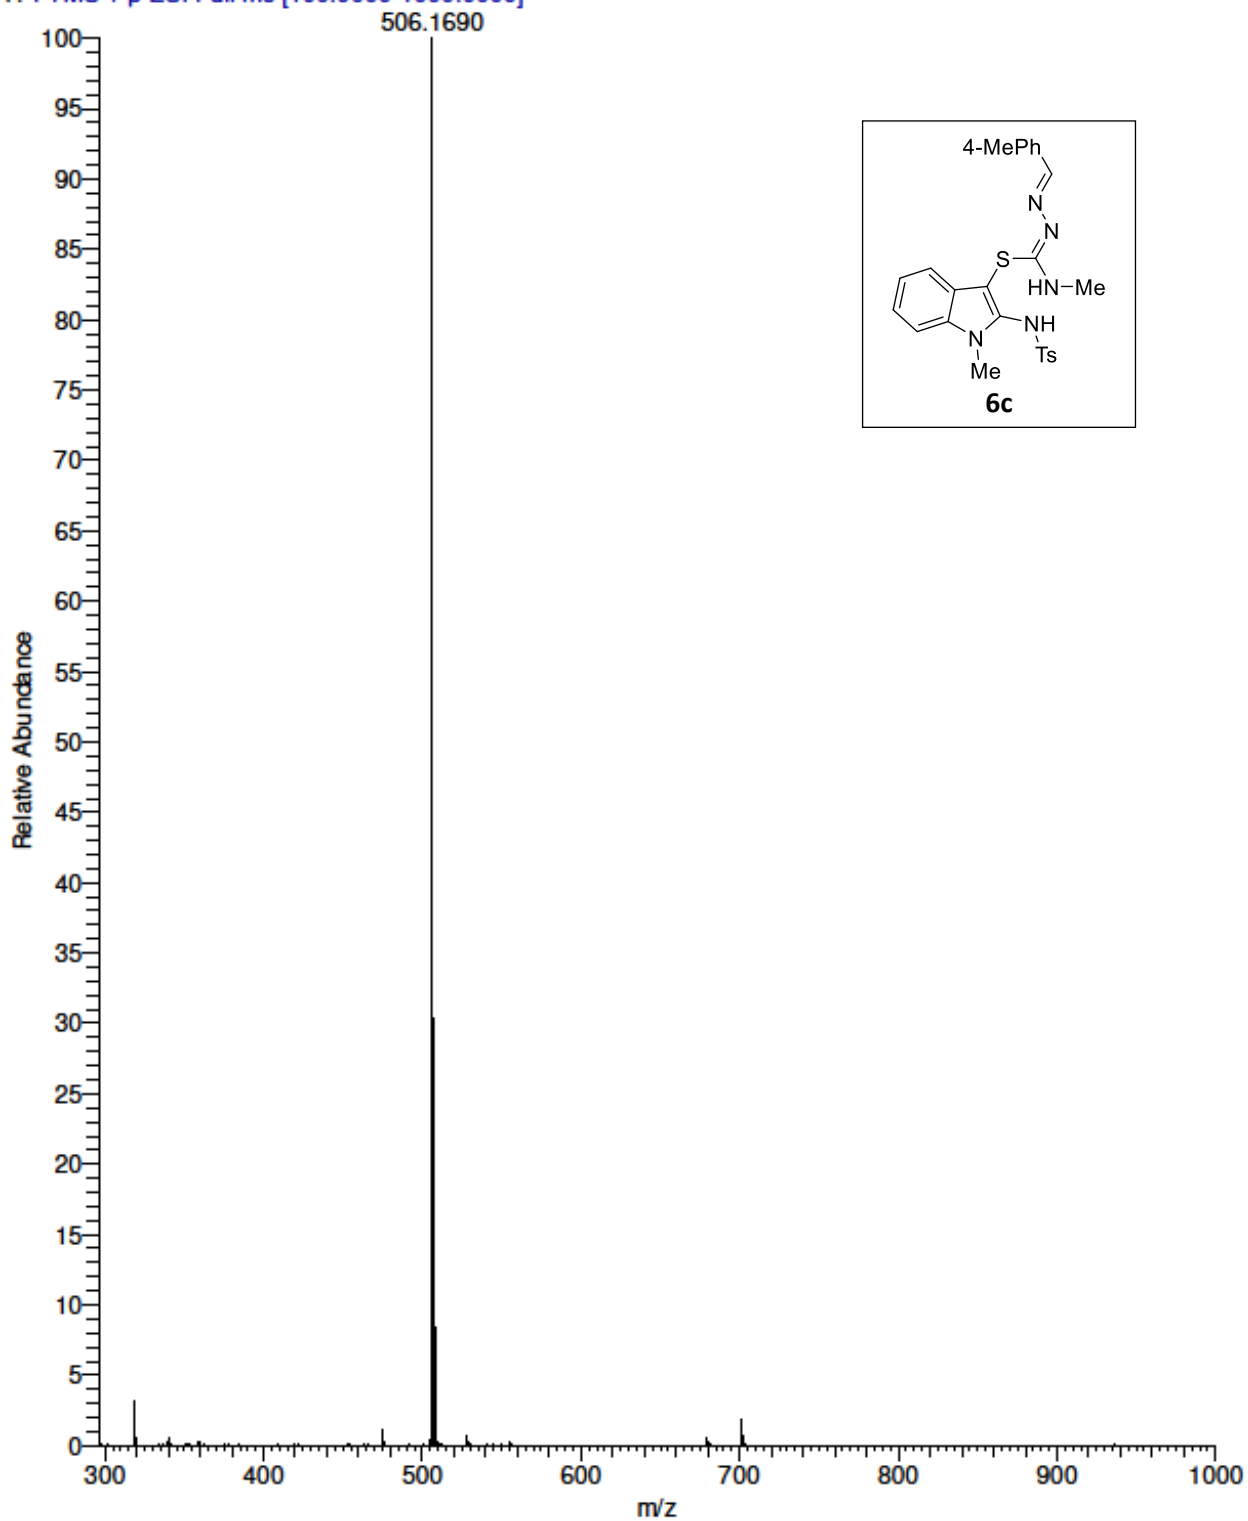

1-Allyl-2-[(4-methylbenzene-1-sulfonyl)amino]-1*H*-indol-3-yl(2*E*)-*N*-methyl-2-[(4-methylphenyl)methylidene]hydrazine-1-carboximidothioate (**6d**)

D:\January-2021-Onwards\RFM-170

03/11/21 14:22:03

RFM-170 #42 RT: 0.41 AV: 1 NL: 4.18E9

T: FTMS + p ESI Full ms [133.4000-2000.0000]

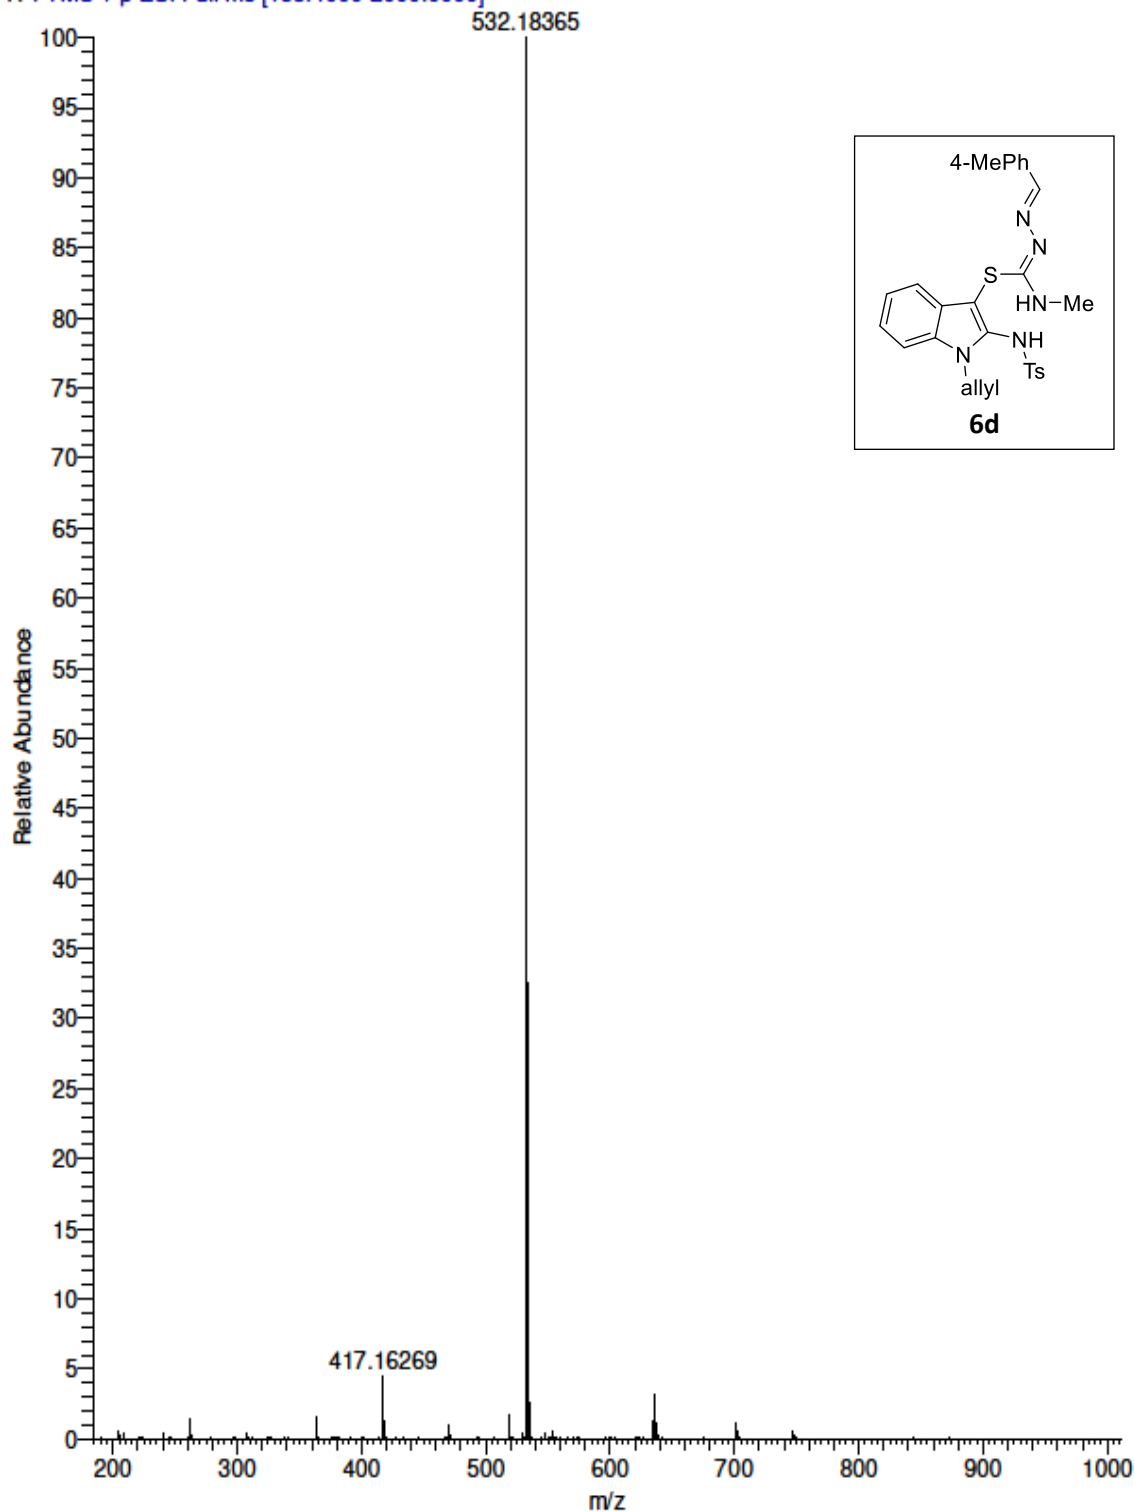

1-Benzyl-2-[(4-methylbenzene-1-sulfonyl)amino]-1*H*-indol-3-yl(2*E*)-*N*-methyl-2-[(4-methylphenyl)methylidene]hydrazine-1-carboximidothioate (**6e**)

D:\January-2021-Onwards\RFM-171

03/11/21 14:26:22

RFM-171 #44 RT: 0.43 AV: 1 NL: 1.84E9

T: FTMS + p ESI Full ms [133.4000-2000.0000]

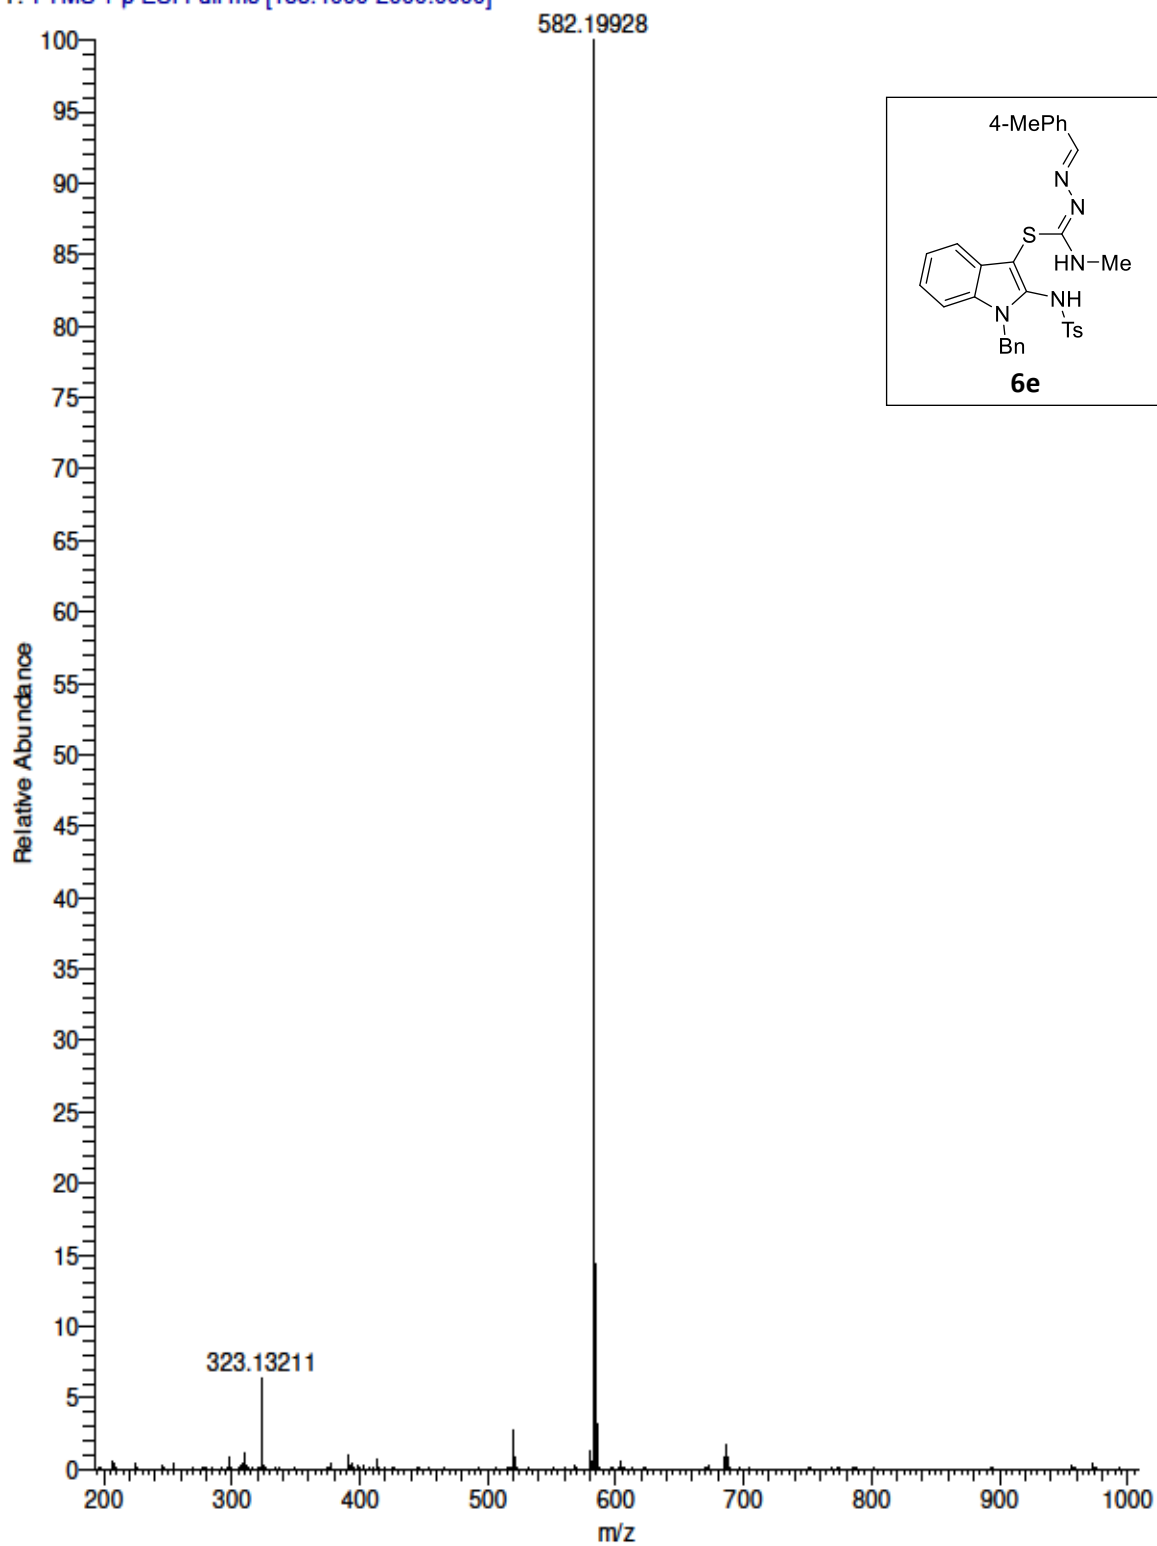

**1-Ethyl-2-[(4-methylbenzene-1-sulfonyl)amino]-5-methoxy-1*H*-indol-3-yl(2*E*)-*N*-methyl-2-[(3,4,5-trimethoxyphenyl)methylidene]hydrazine-1-carboximidothioate (6f)**

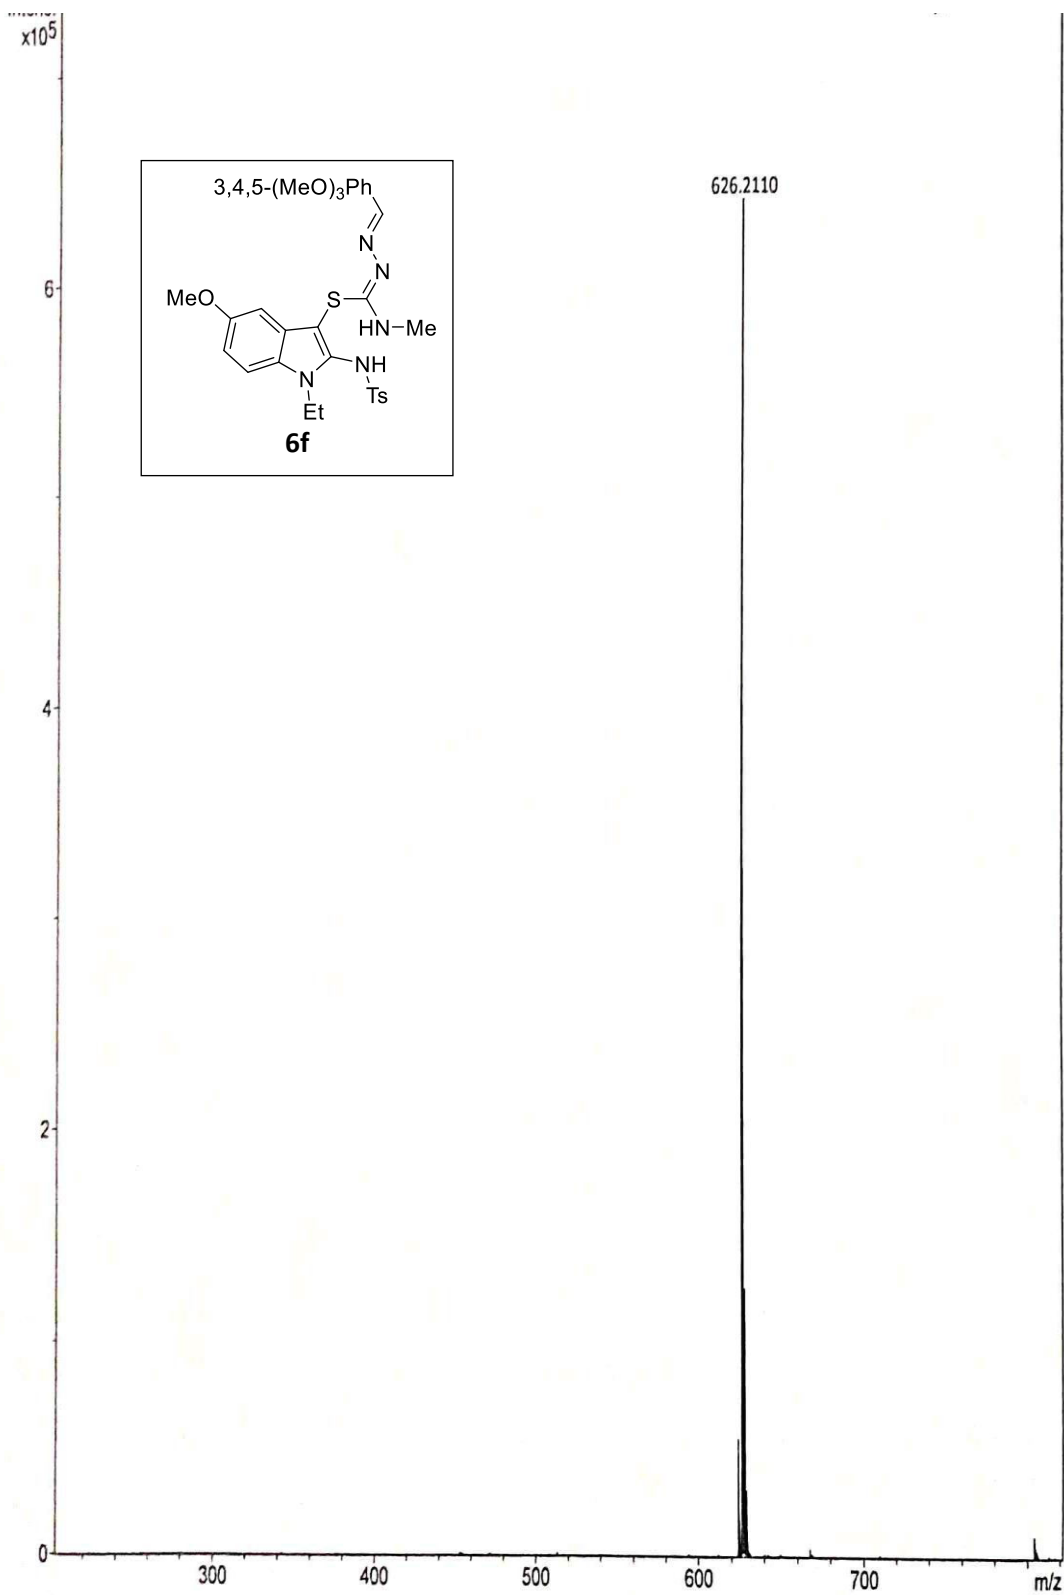

**1-Ethyl-2-[(4-methylbenzene-1-sulfonyl)amino]-5-methoxy-1*H*-indol-3-yl(2*E*)-*N*-methyl-2-(1-(naphthalenyl)methylidene)hydrazine-1-carboximidothioate (6g)**

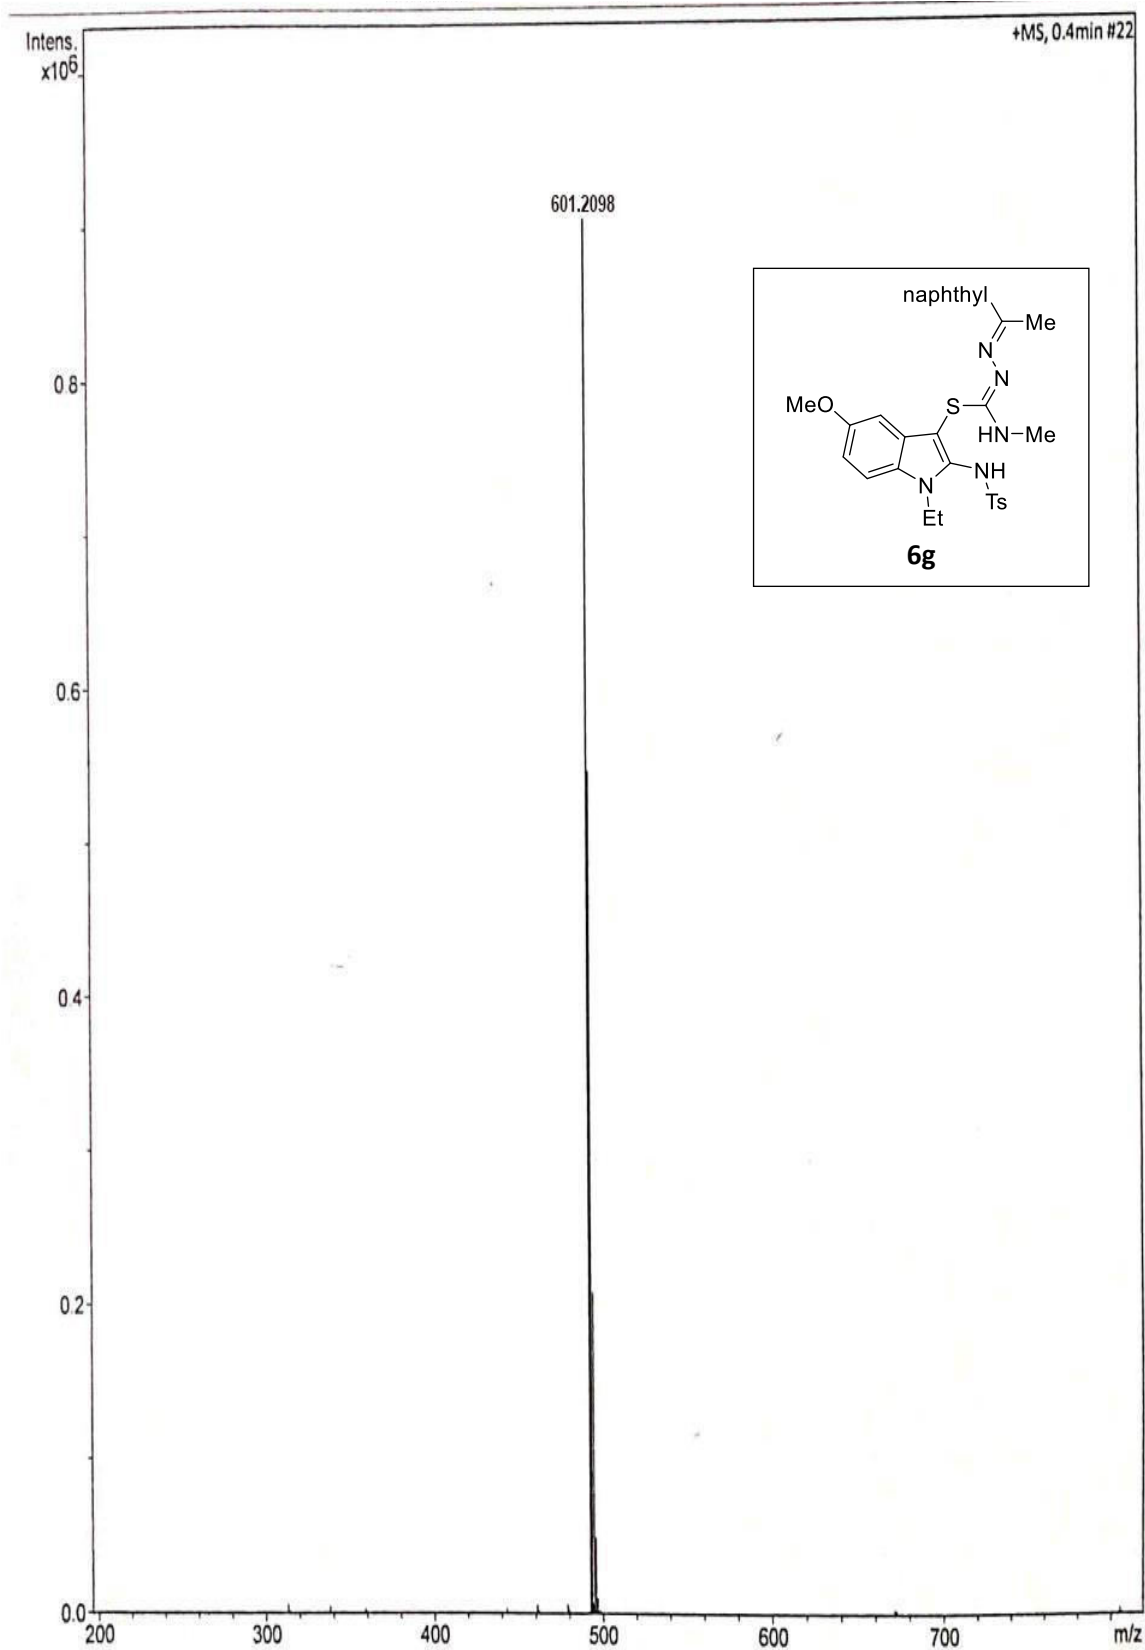

**1-Methyl-2-[(4-methylbenzene-1-sulfonyl)amino]-1*H*-indol-3-yl-*N*-methyl-2-[(di-*p*-chlorophenyl)methylidene]hydrazine-1-carboximidothioate (**6h**)**

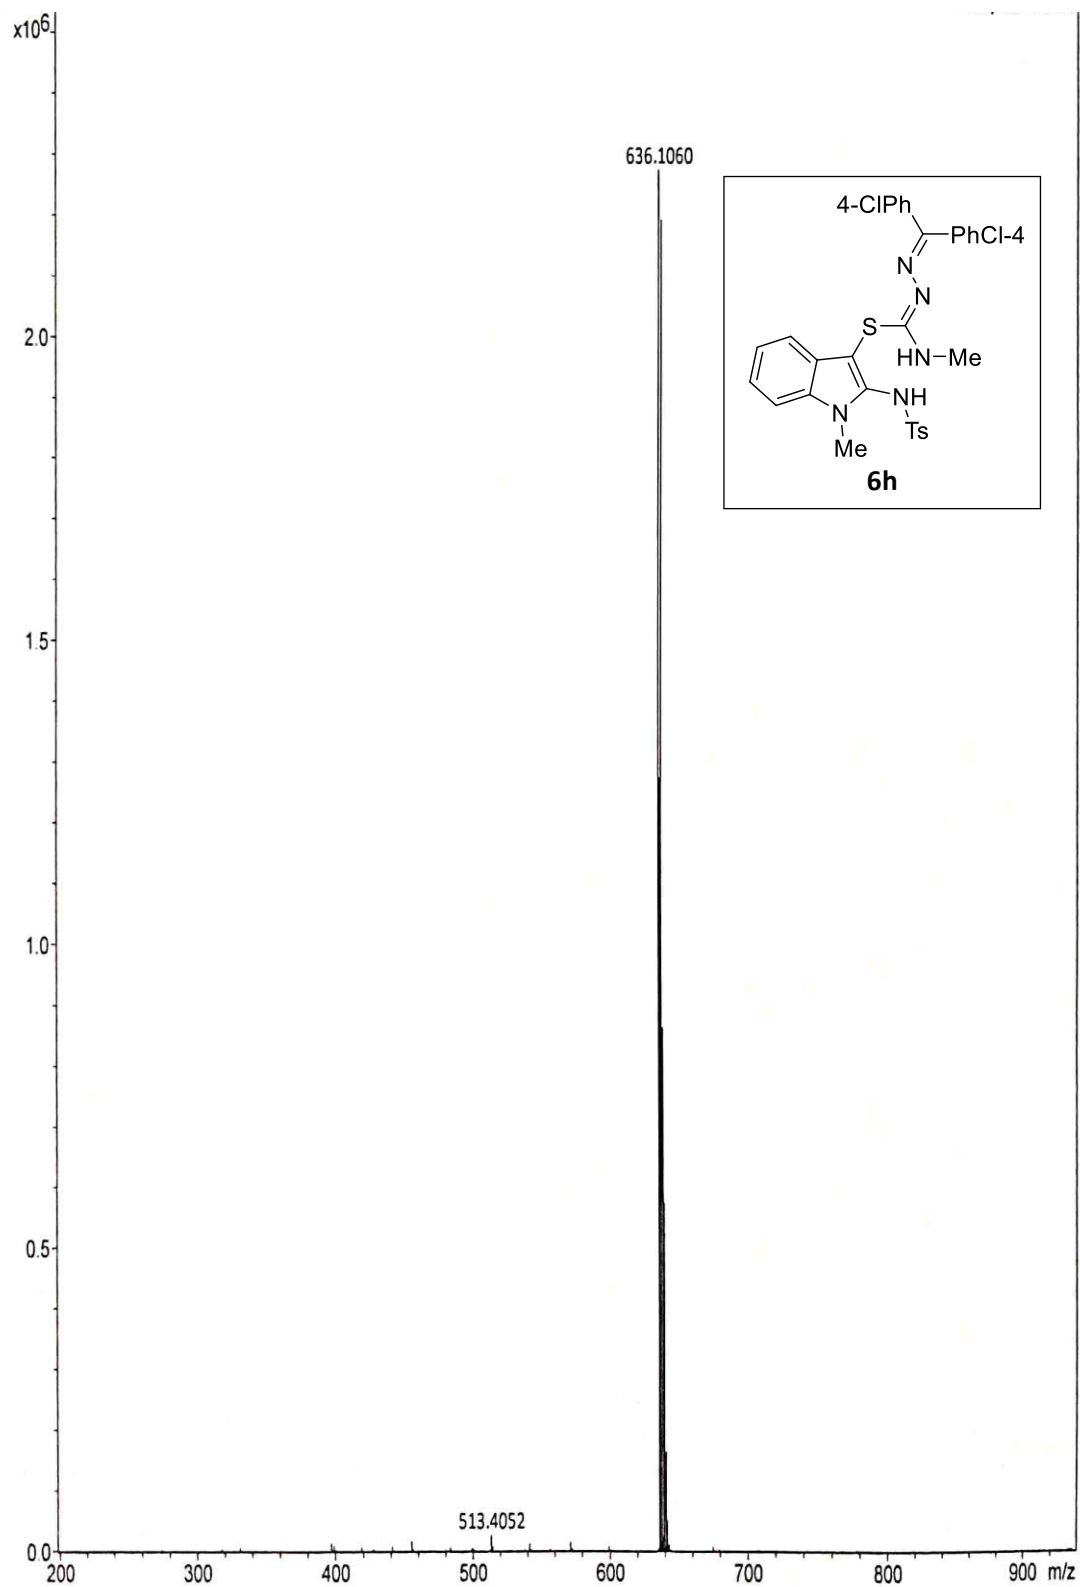



**1-Benzyl-2-[(4-methylbenzene-1-sulfonyl)amino]-1*H*-indol-3-yl-*N*-phenyl-2-[(di-*p*-tolyl)methylidene]hydrazine-1-carboximidothioate (**6i**)**

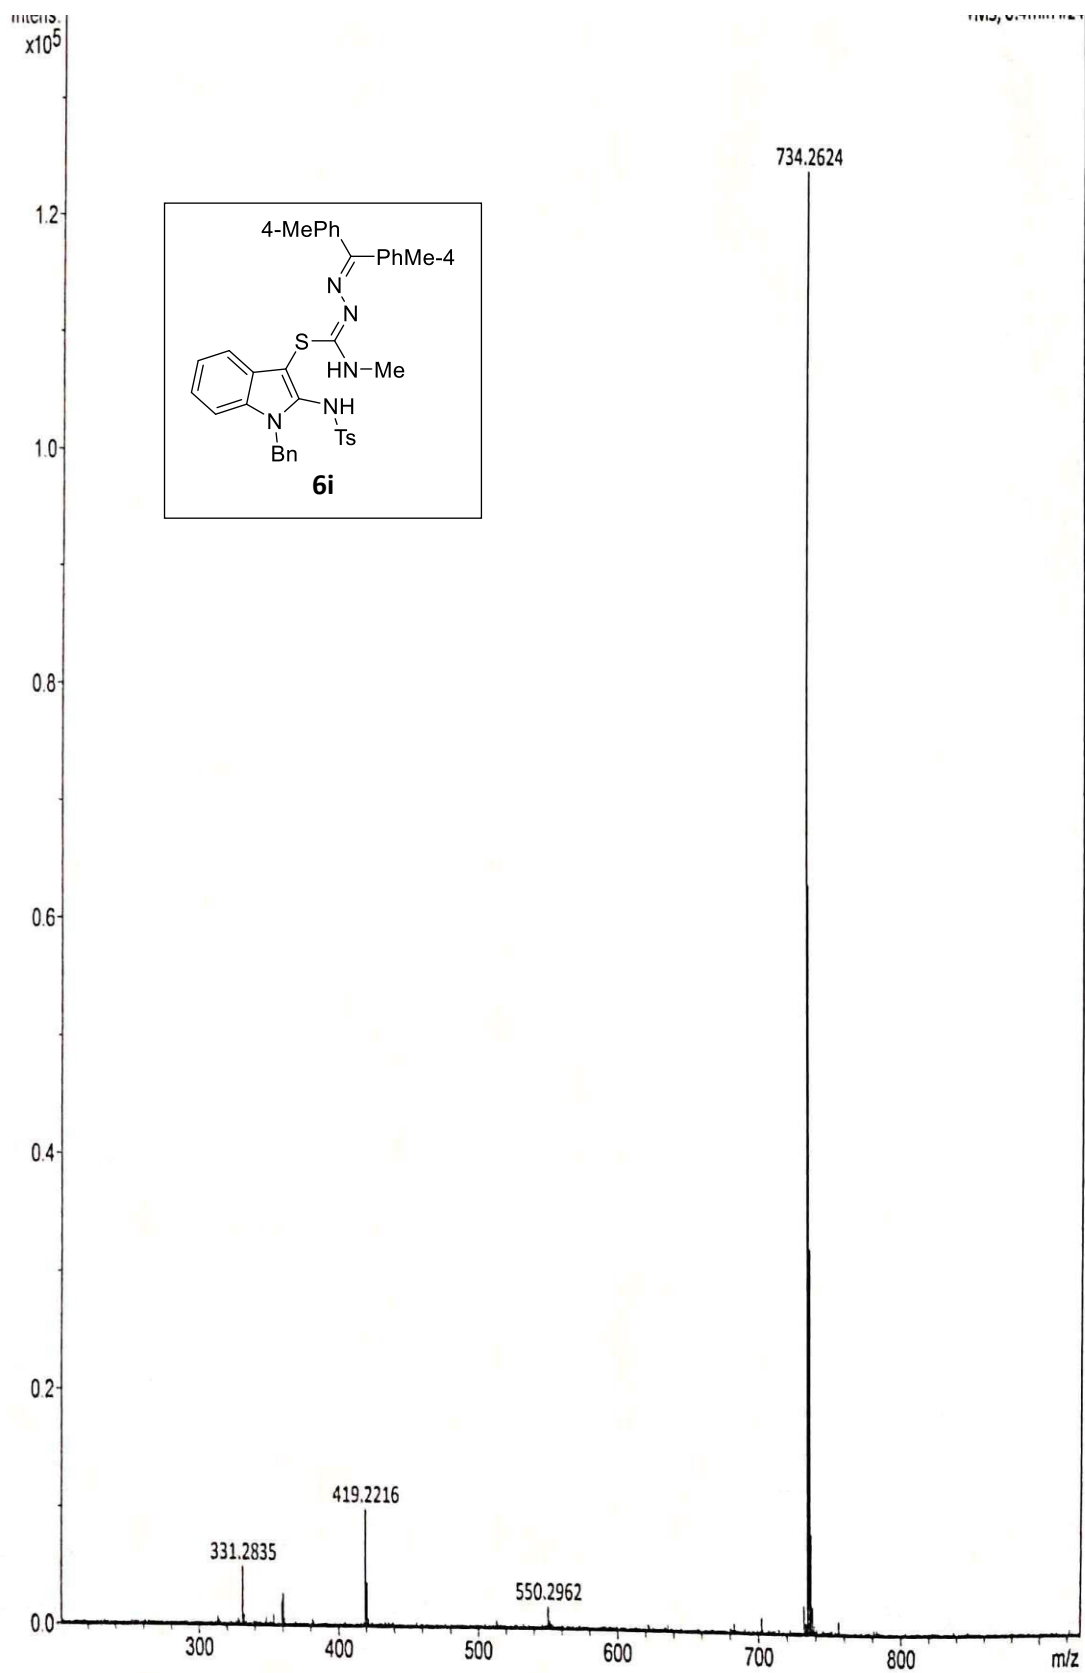

**1-Allyl-2-[(4-methylbenzene-1-sulfonyl)amino]-1*H*-indol-3-yl(2*E*)-2[(1-benzyl-2-oxoindolin-3-ylidene)]hydrazine-1-carboximidothioate (6j)**

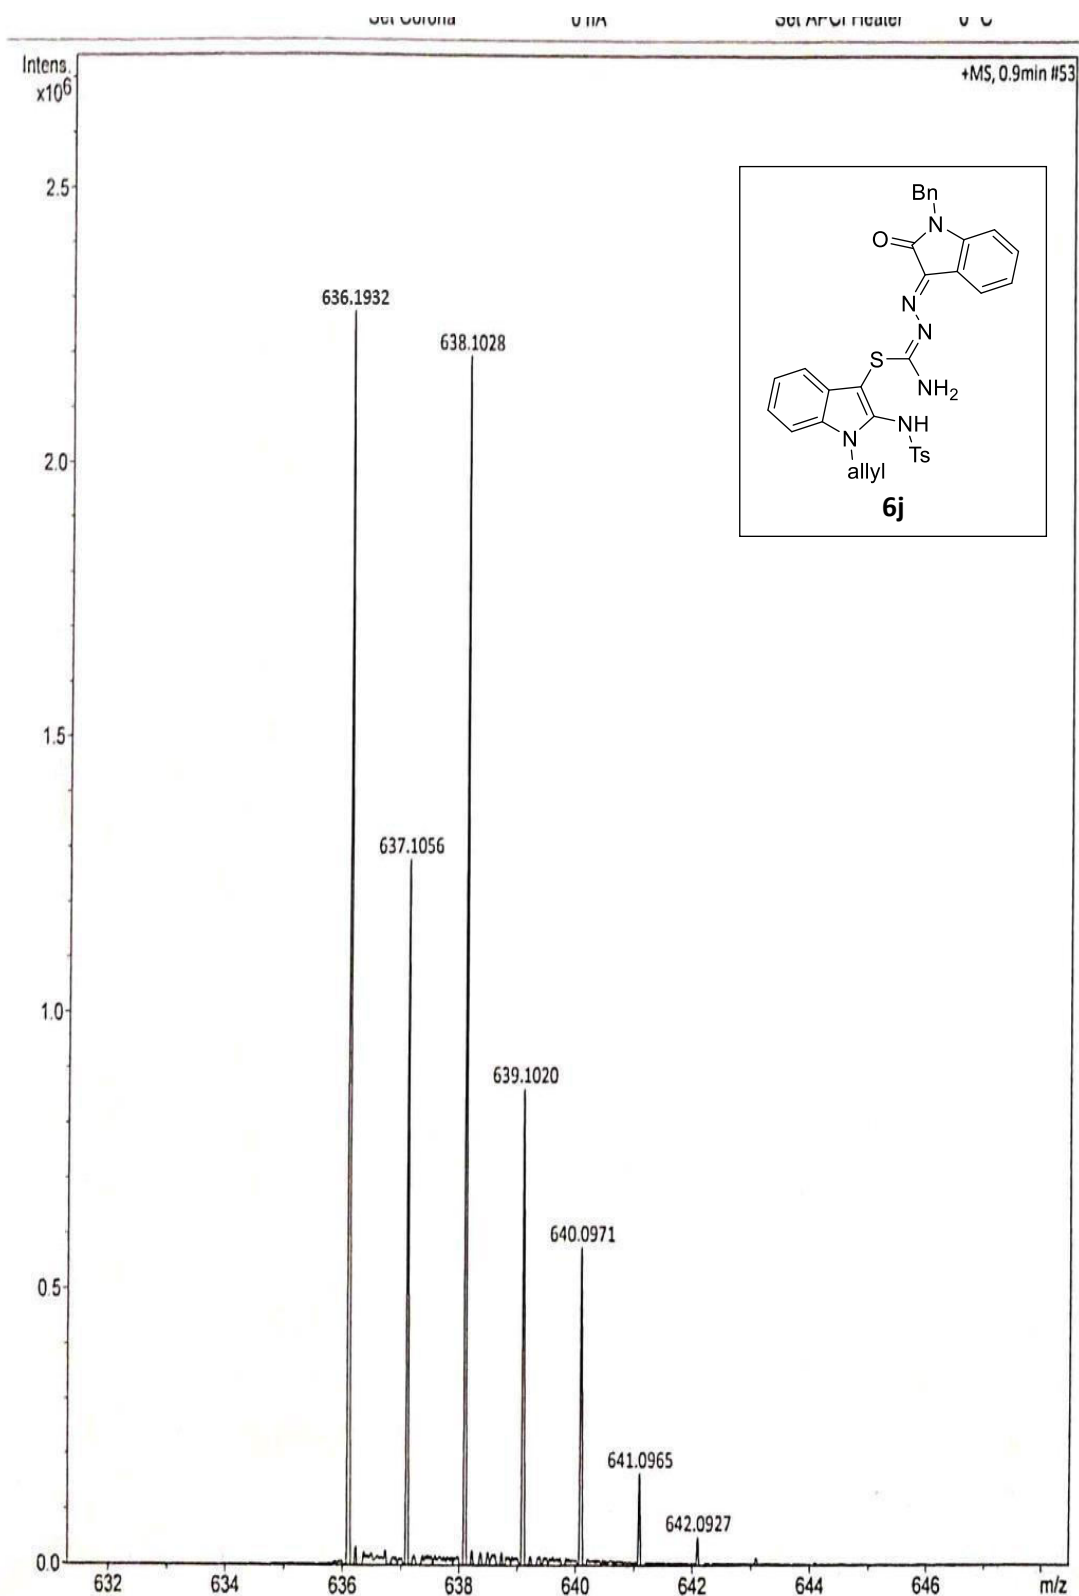

**1-Ethyl-2-[(4-methylbenzene-1-sulfonyl)amino]-5-bromo-1*H*-indol-3-yl(2*E*)-*N*-methyl-2-[(4-bromophenyl)methylidene]hydrazine-1-carboximidothioate (6k)**

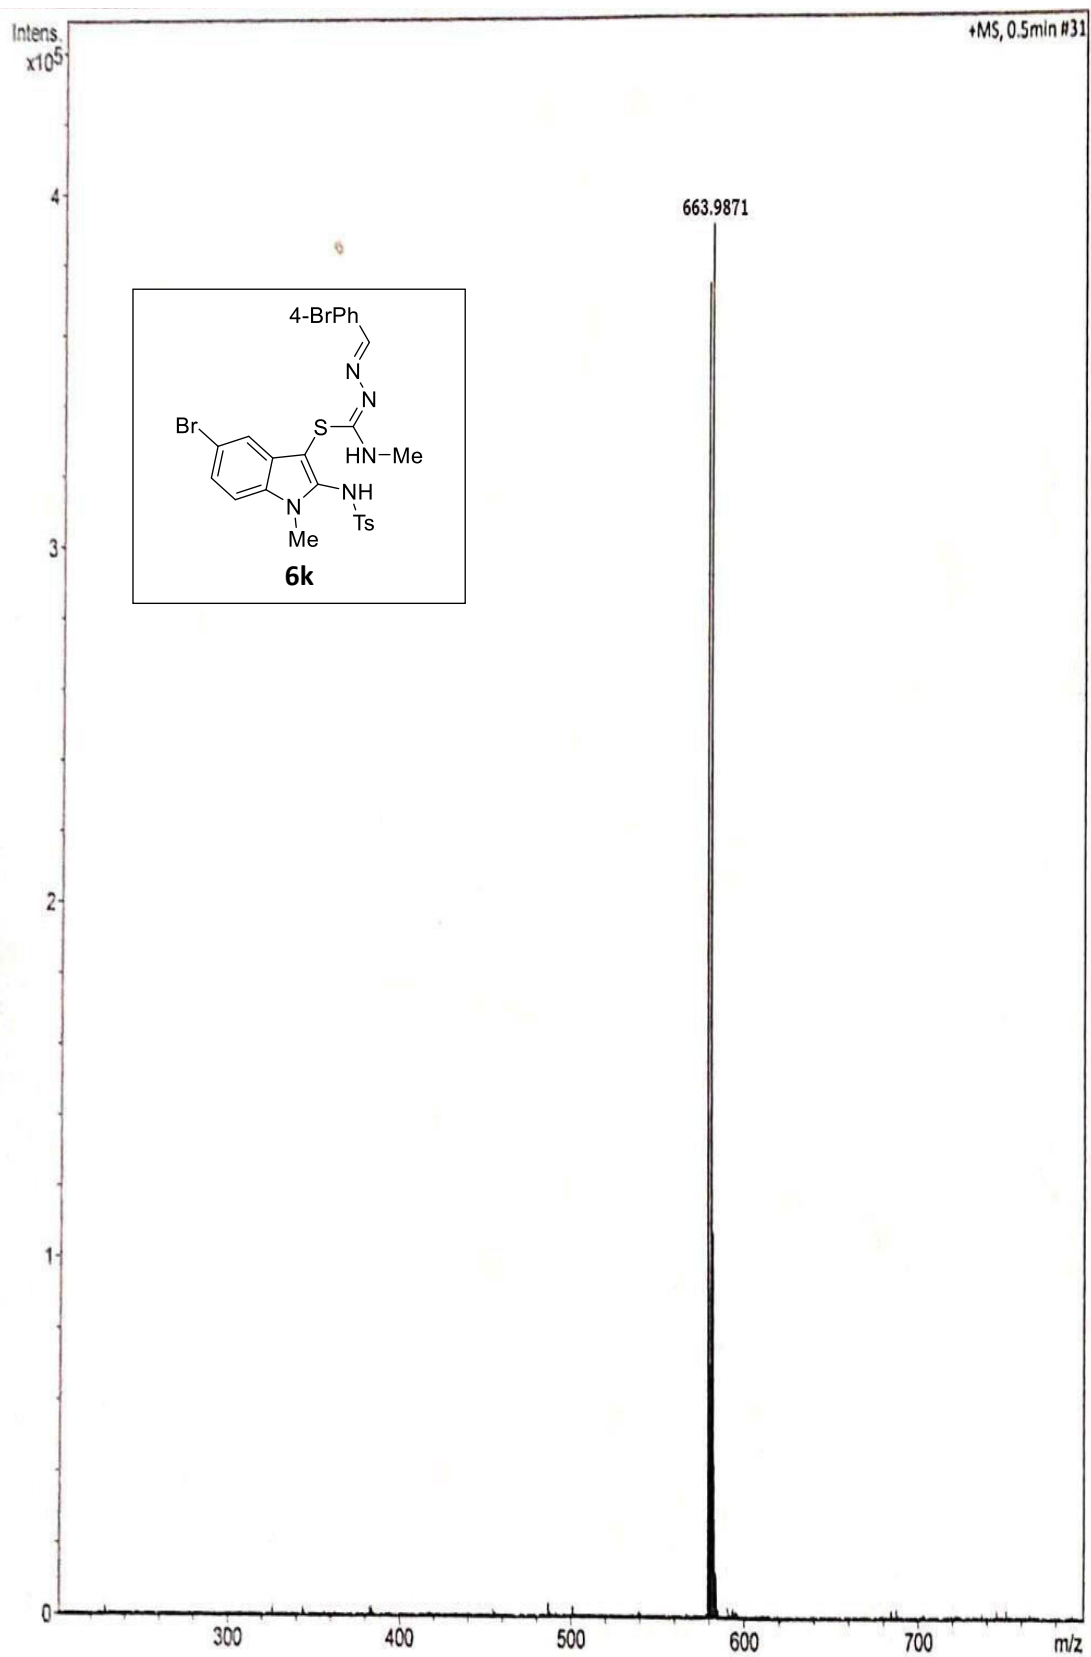

**1-Methyl-2-[(4-methylbenzene-1-sulfonyl)amino]-1*H*-indol-3-yl(2*E*)-2[(4-bromophenyl)methylidene]hydrazine-1-carboximidothioate (6I)**

D:\January-2021-Onwards\RFM-124

02/20/21 01:45:16

RFM-124 #47 RT: 0.47 AV: 1 NL: 6.23E8

T: FTMS + p ESI Full ms [100.0000-1000.0000]

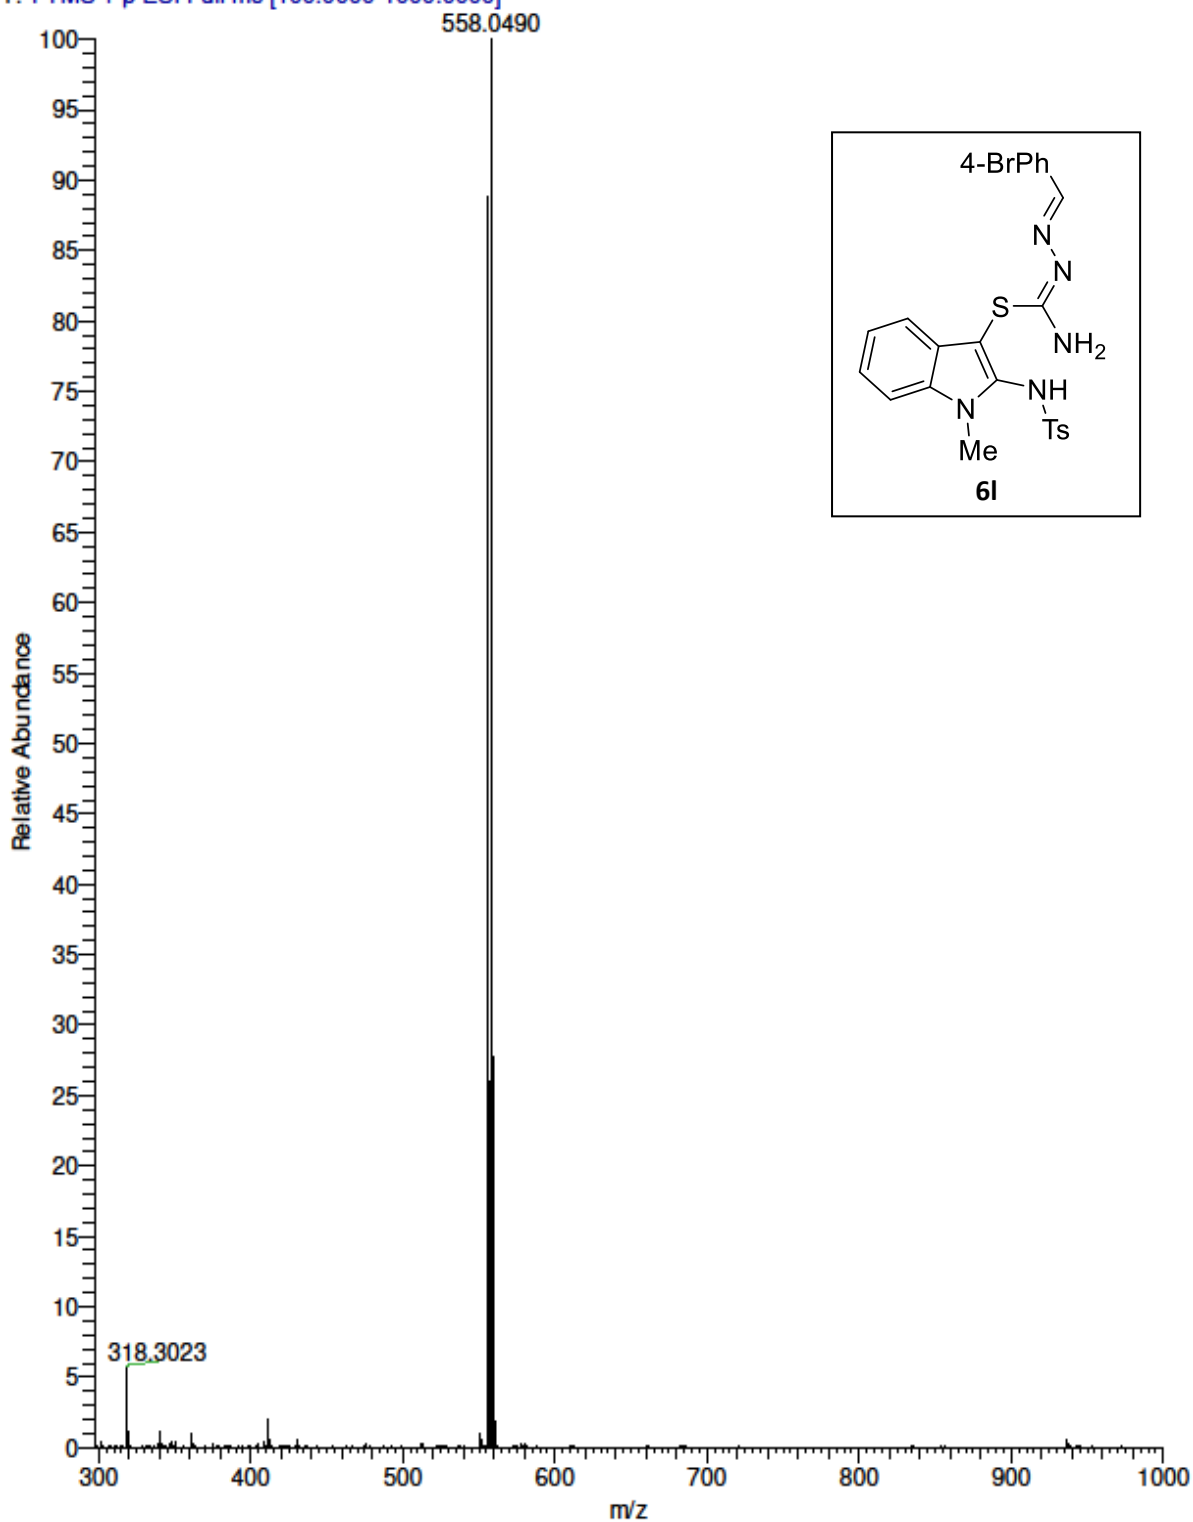

**1-Ethyl-2-[(4-methylbenzene-1-sulfonyl)amino]-5-methoxy-1*H*-indol-3-yl(2*E*)-2-[(phenyl)methylidene]hydrazine-1-carboximidothioate (6m)**

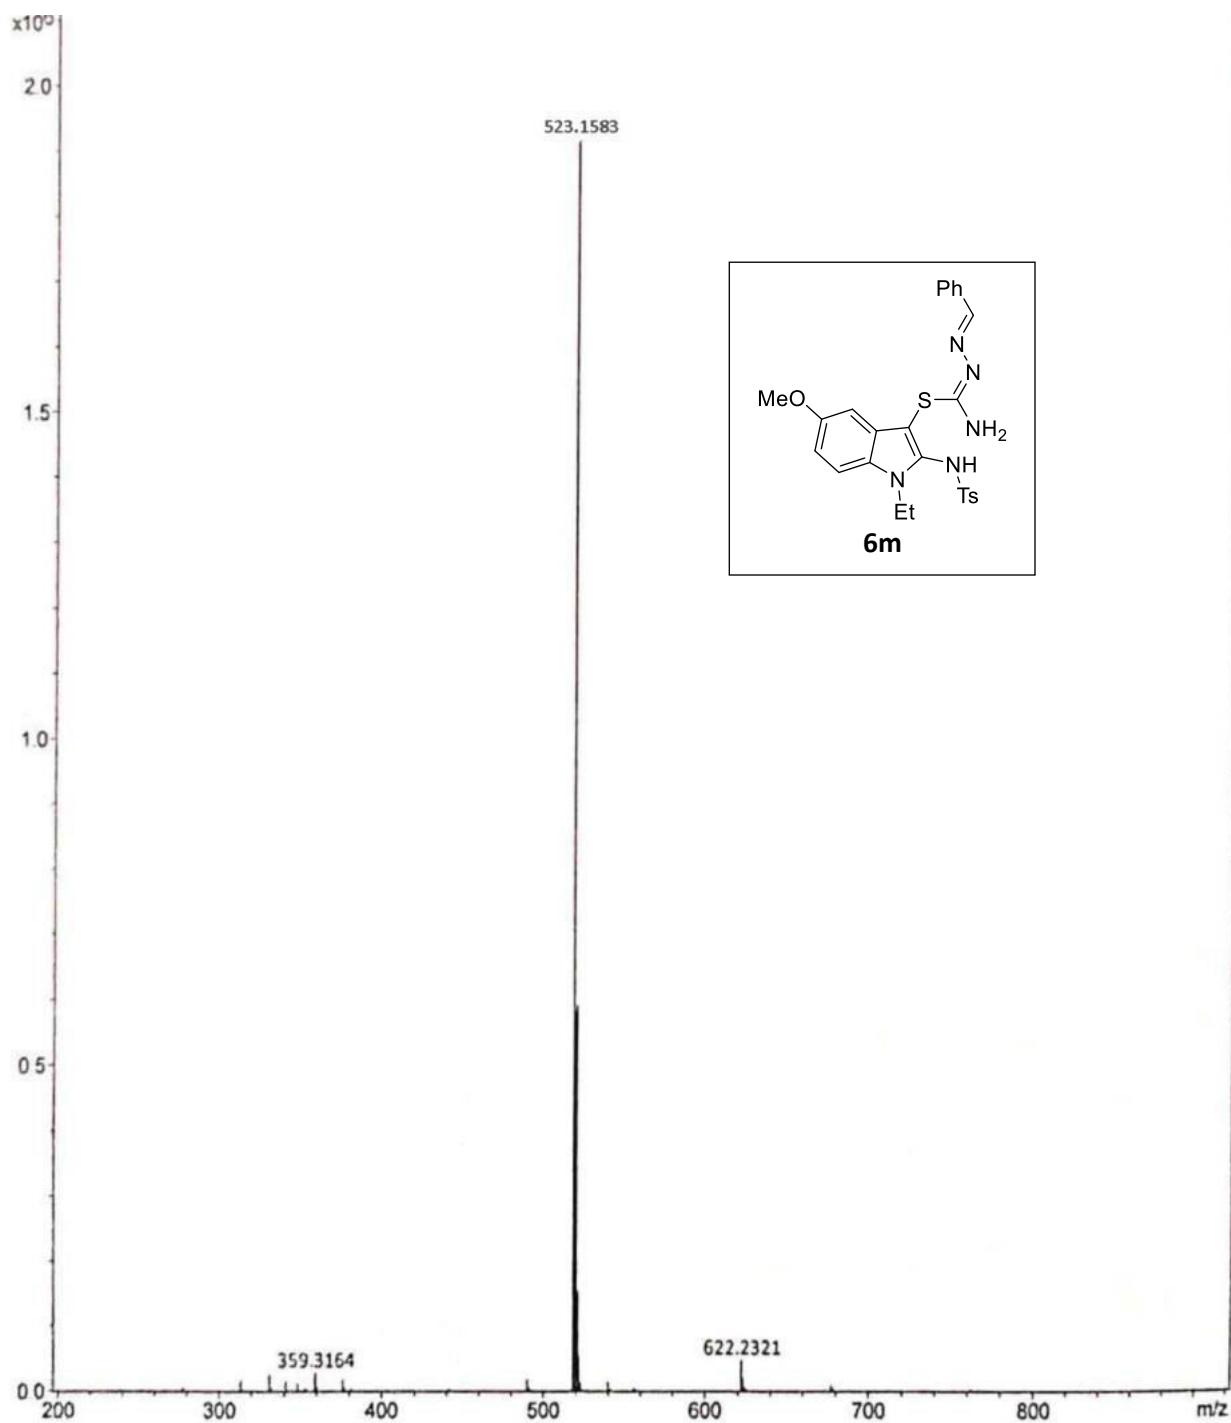

**N-{1-Benzyl-3-[(1H-imidazol-2-yl)sulfanyl]-1H-indol-2-yl}-4-methylbenzenesulfonamide (8a)**

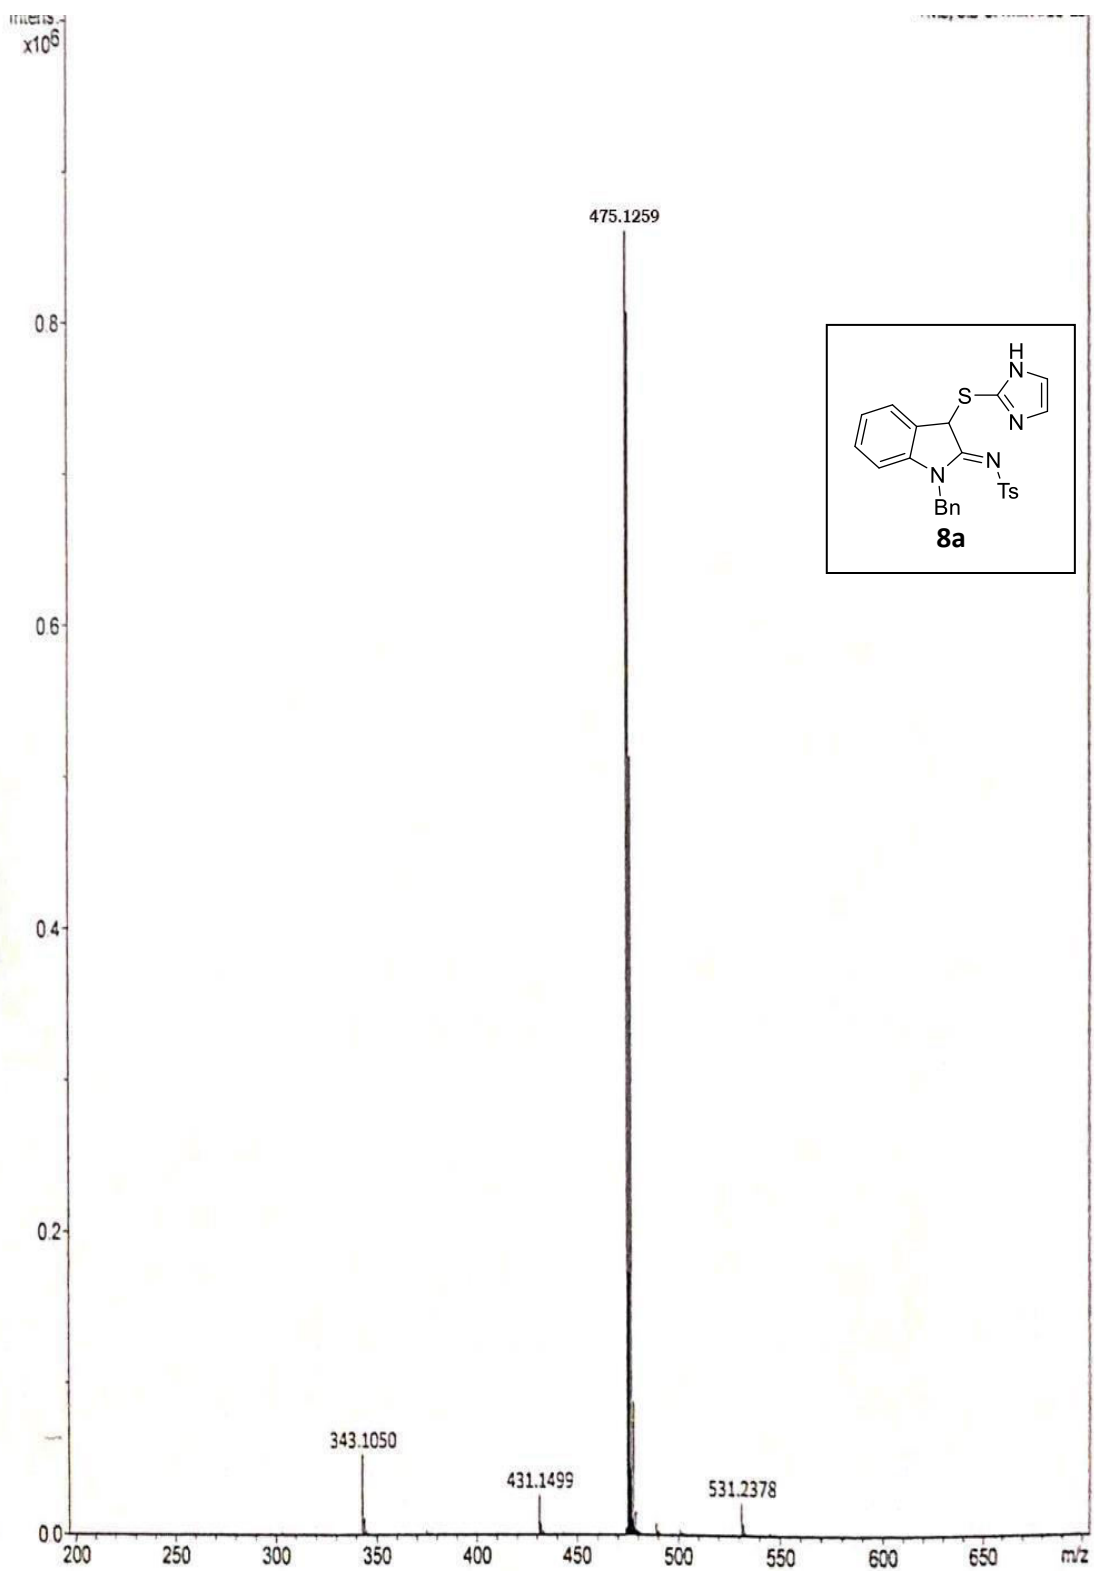

**N-{1-Ethyl-3-[(5-methoxy-1H-benzo[d]imidazol-2-yl)sulfanyl]-5-bromo-1H-indol-2-yl}-4-methylbenzenesulfonamide (8b)**

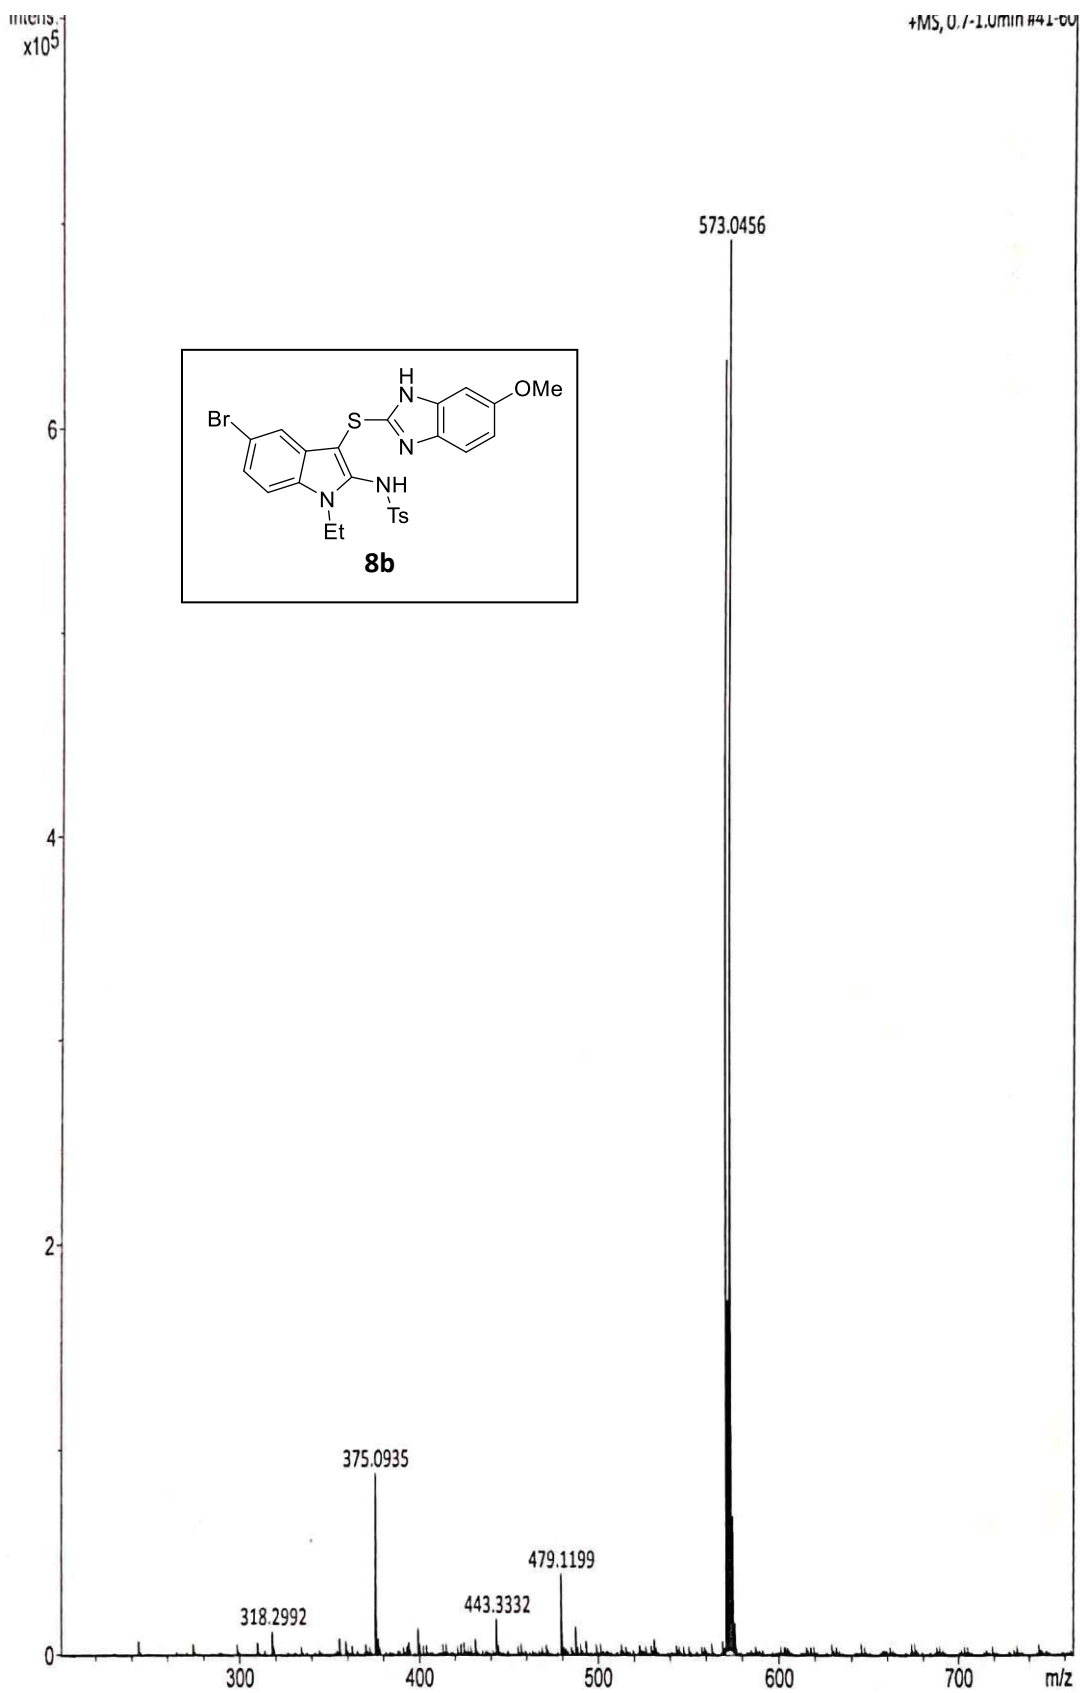

**N-{1-Ethyl-3-[(5-methoxy-1H-benzo[d]imidazol-2-yl)sulfanyl]-1H-indol-2-yl}-4-methylbenzenesulfonamide (8c)**

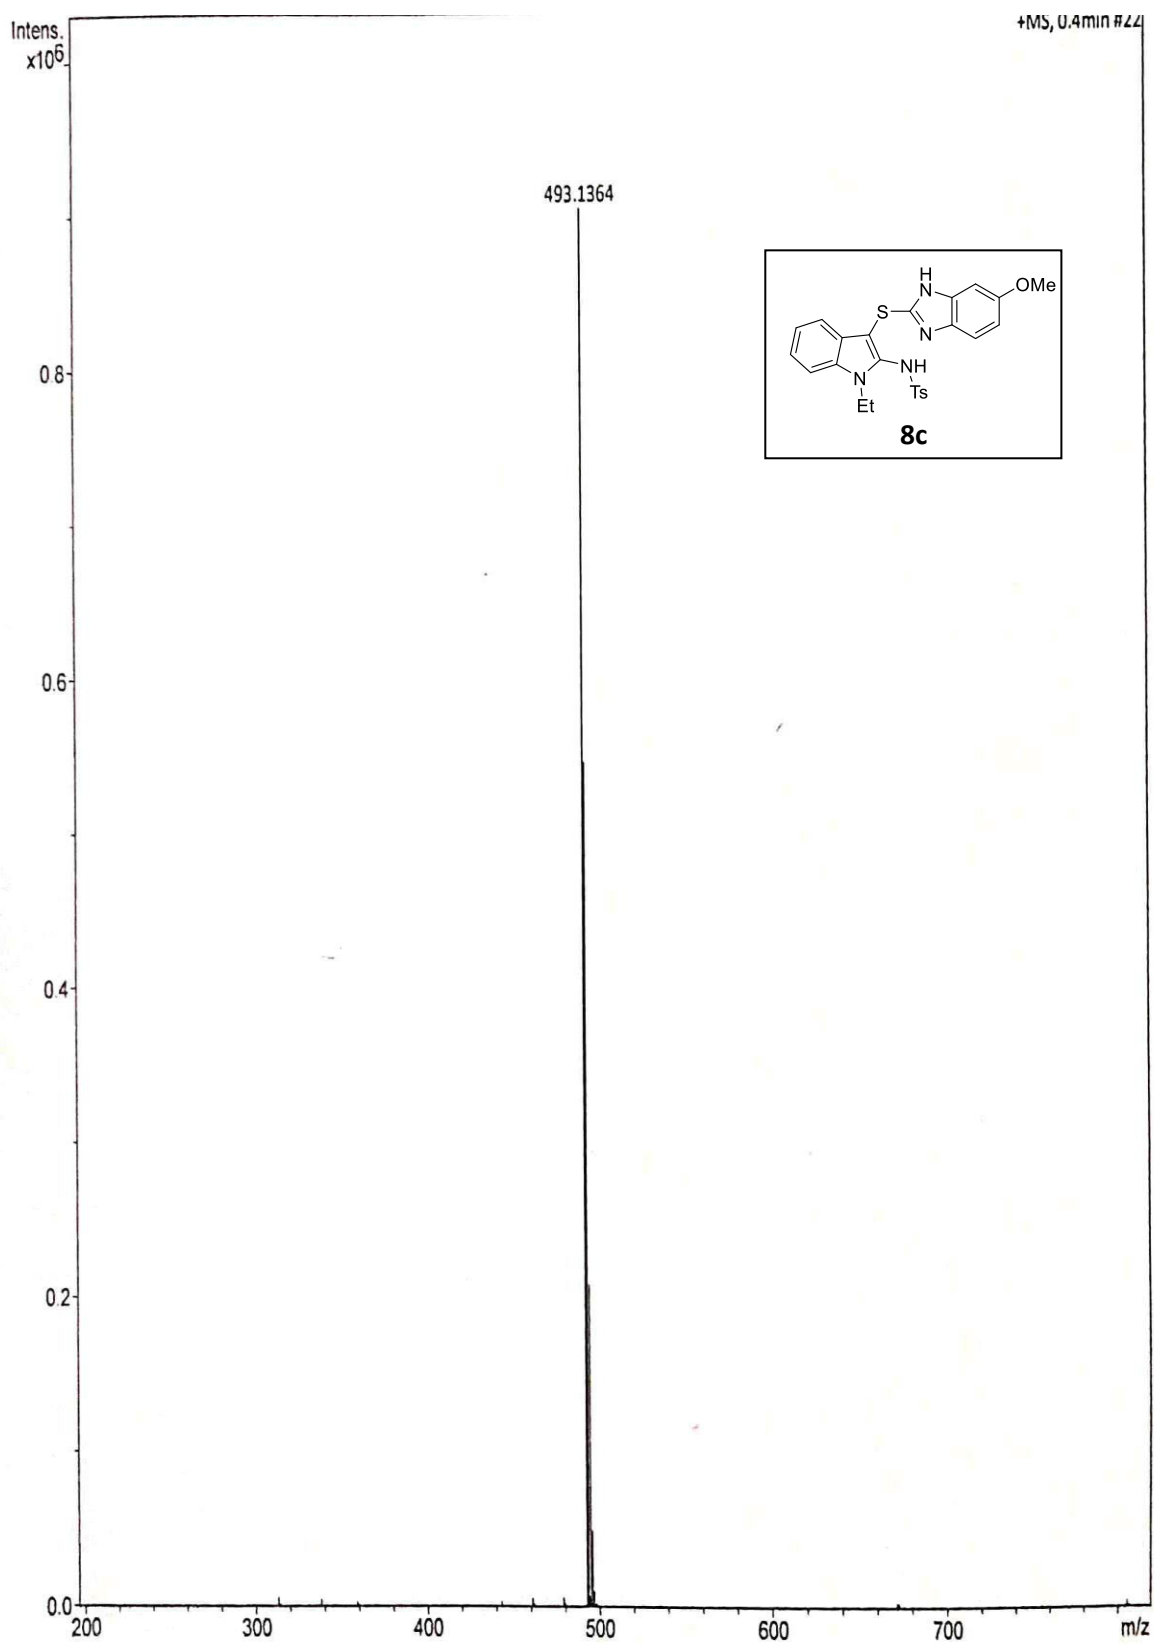



**N-{1-Ethyl-3-[(5-nitro-1H-benzo[d]imidazol-2-yl)sulfanyl]-5-methoxy-1H-indol-2-yl}-4-methylbenzenesulfonamide (8d)**

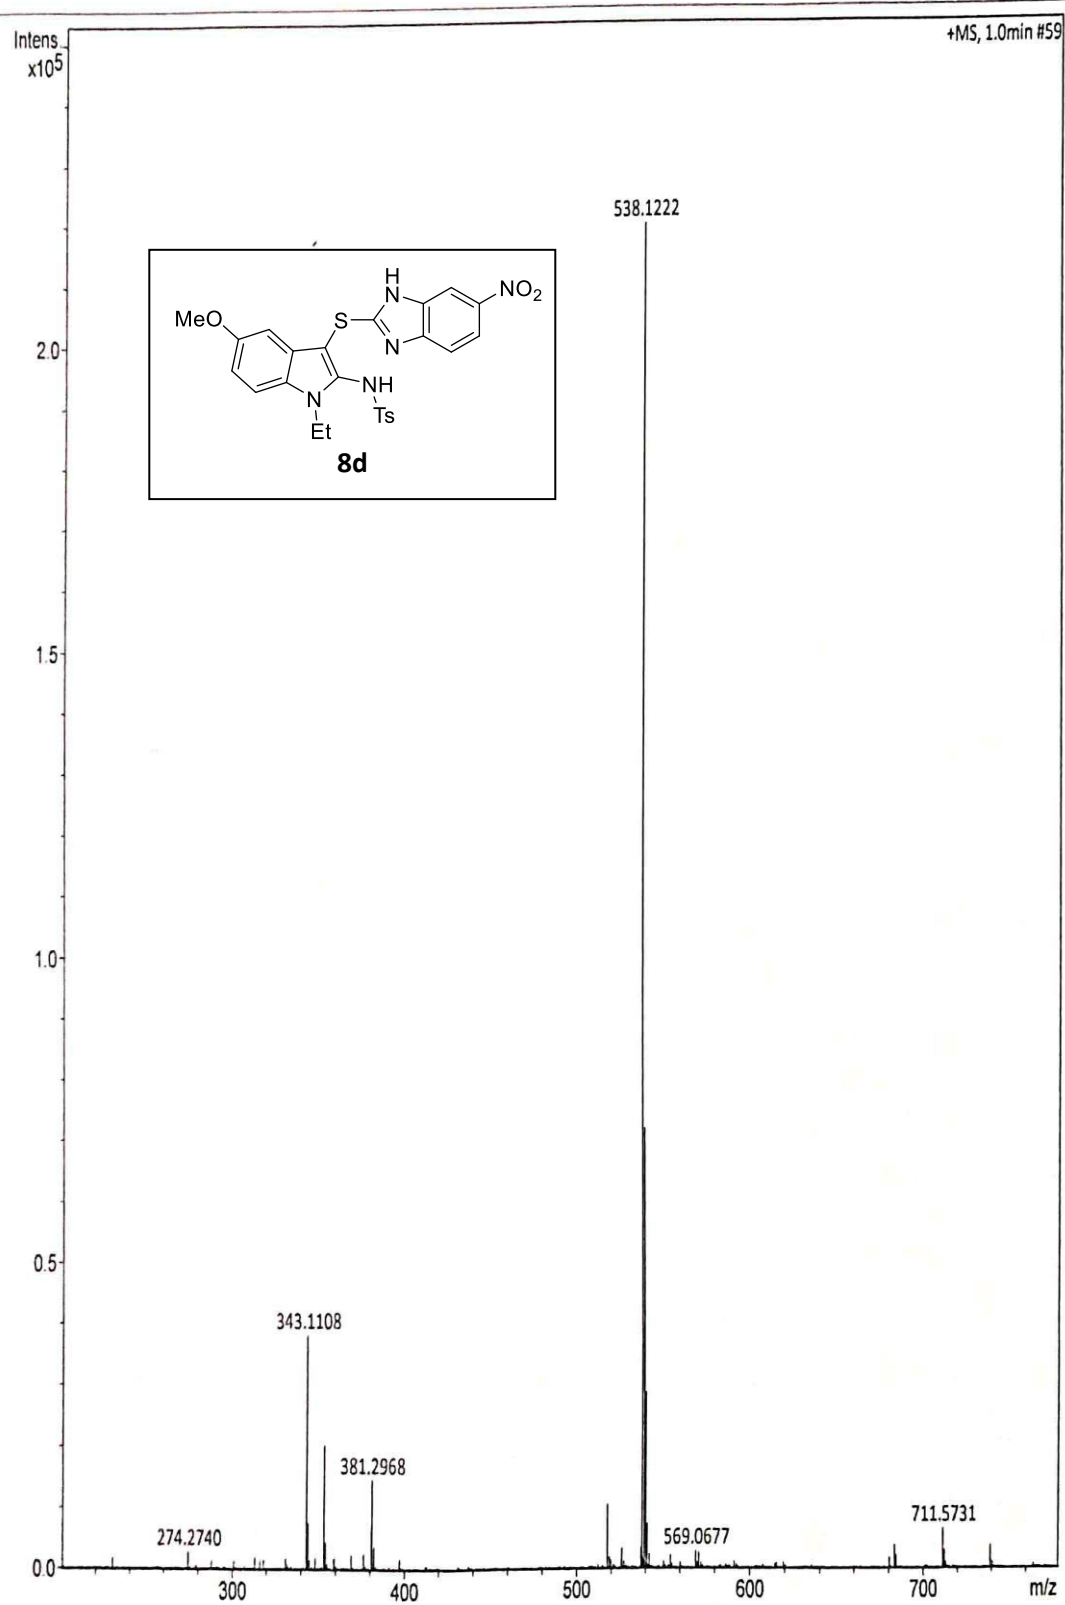

**N-{1-Methyl-3-[(1H-benzo[d]oxazol-2-yl)sulfanyl]-1H-indol-2-yl}-4-methylbenzenesulfonamide (8e)**

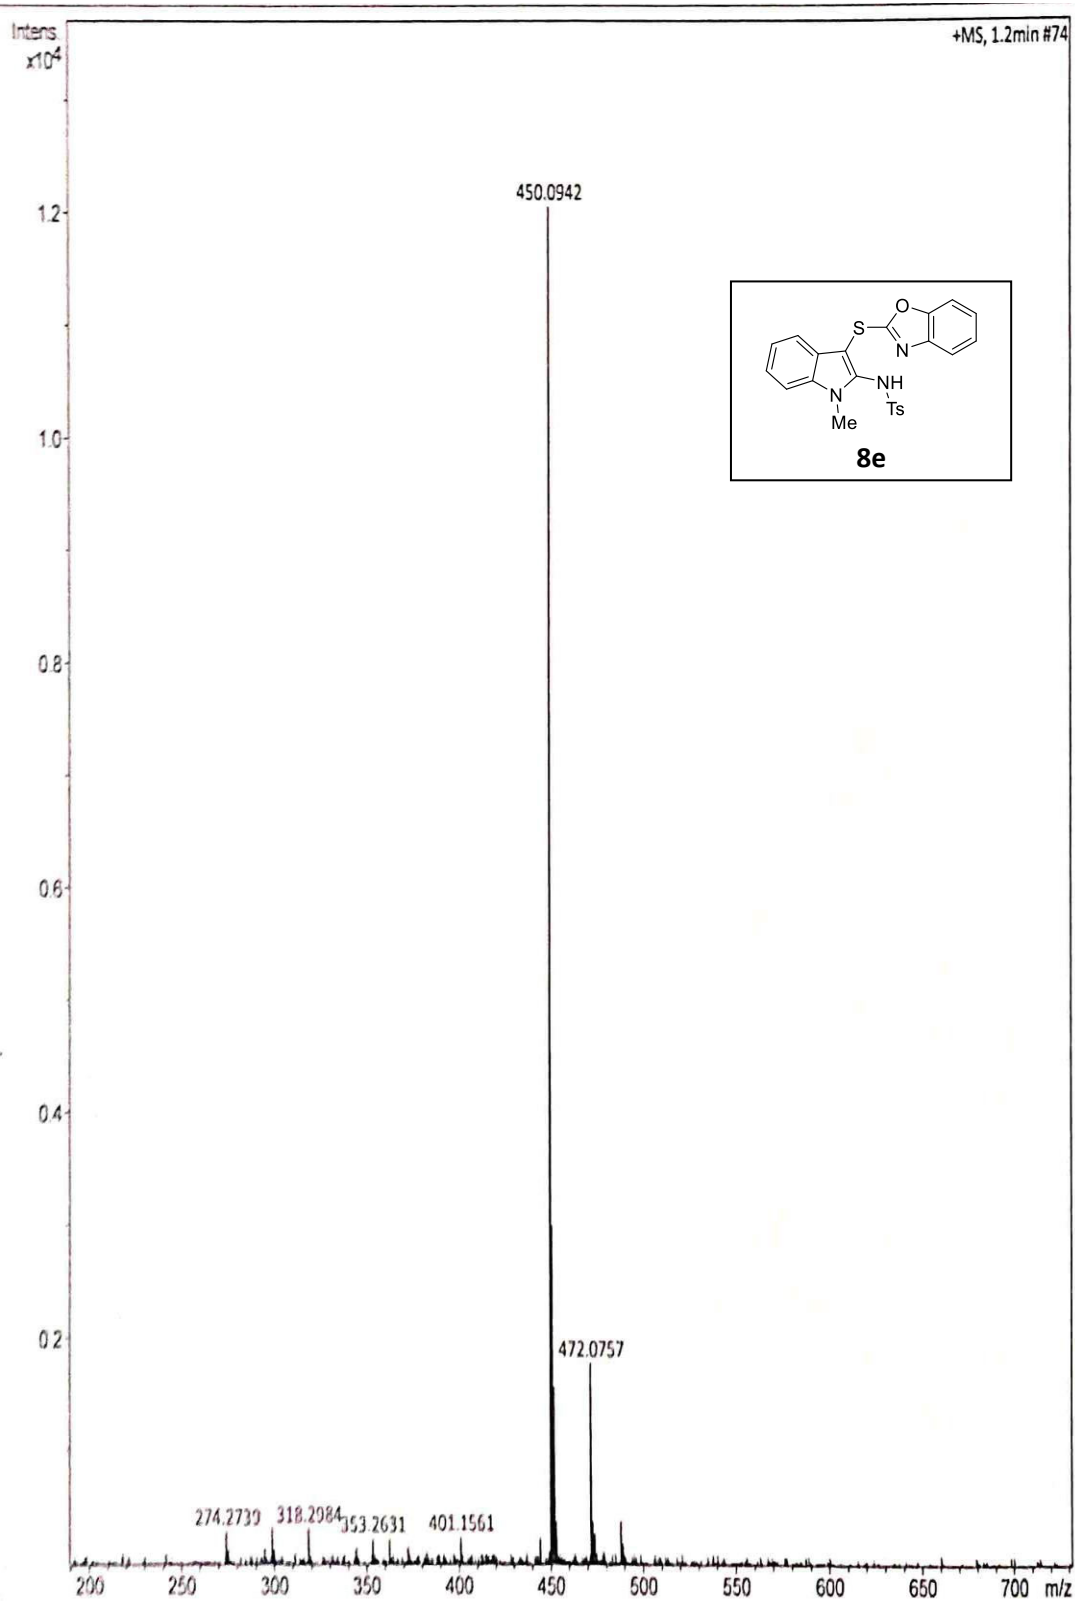

**N-{1-Allyl-3-[(5-chloro-1H-benzo[d]thiazol-2-yl)sulfanyl]-1H-indol-2-yl}-4-methylbenzenesulfonamide (8f)**

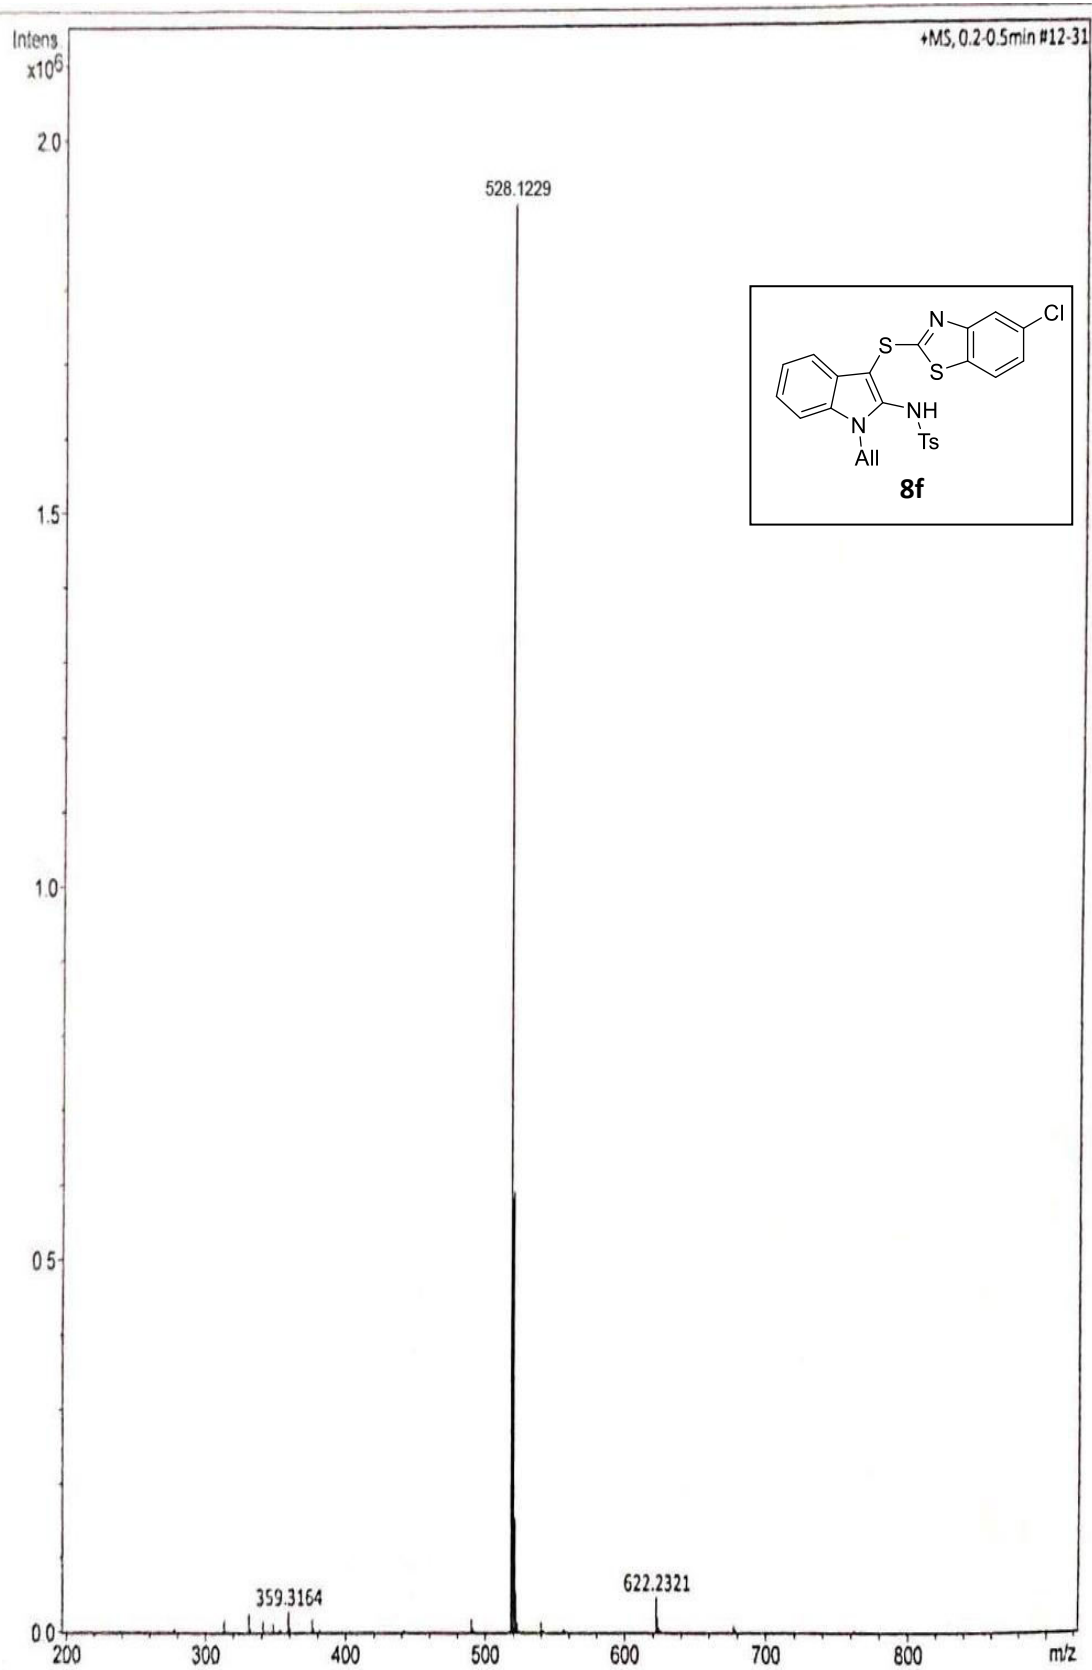

**1-Ethyl-2-[(4-methylbenzene-1-sulfonyl)methylamino]-1*H*-indol-3-yl  
diphenylcarbamimidothioate (14a)**

*N,N'*-

User Spectrum Plot Report

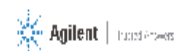

|                |            |              |               |            |         |                   |                                    |
|----------------|------------|--------------|---------------|------------|---------|-------------------|------------------------------------|
| Name           | RFN-14-A   | Rack Pos.    |               | Instrument | QTOF    | Operator          |                                    |
| Inj. Vol. (ul) | 2          | Plate Pos.   |               | IRM Status | Success |                   |                                    |
| Data File      | RFM-14-A.d | Method (Acq) | GCN-NORMAL1.m | Comment    |         | Acq. Time (Local) | 09-11-2022 17:46:42<br>(UTC-08:00) |

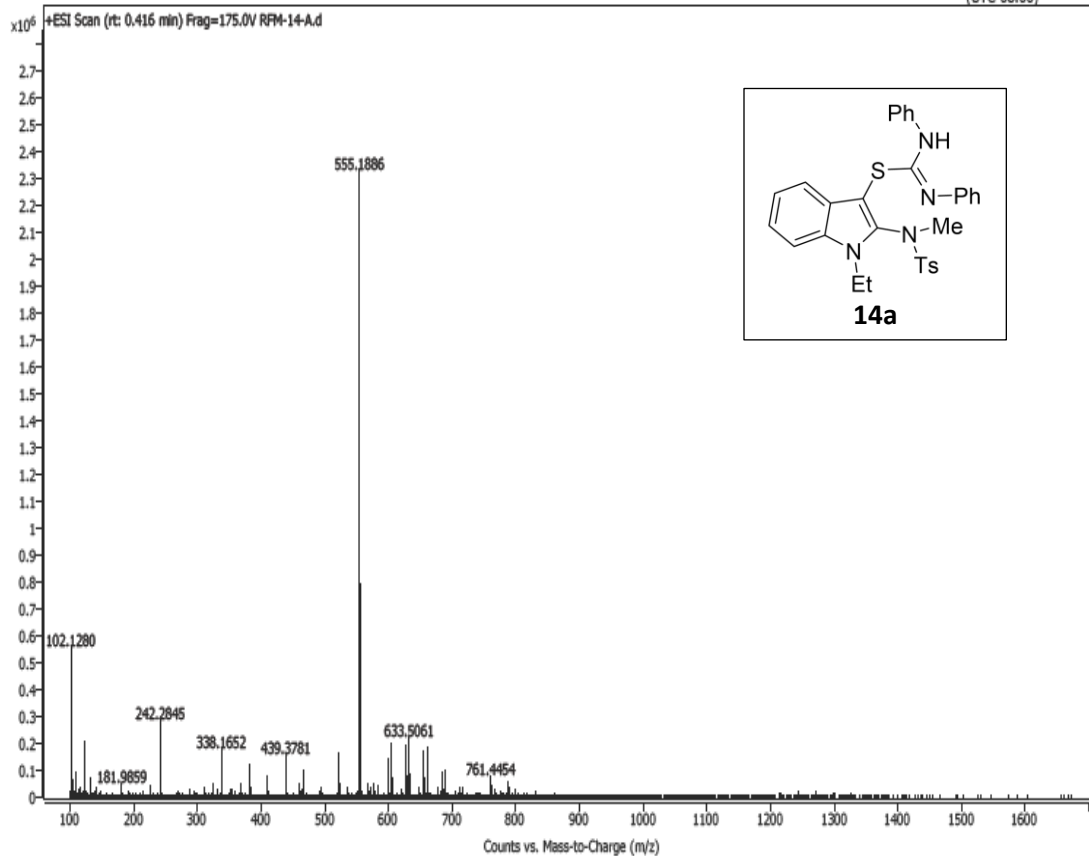

# N-{1-Methyl-3-[(1H-benzo[d]oxazol-2-yl)sulfanyl]-1H-indol-2-yl}-N-ethyl-4-methylbenzenesulfonamide (14b)

## User Spectrum Plot Report

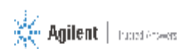

|                |            |              |               |            |         |                   |                                 |
|----------------|------------|--------------|---------------|------------|---------|-------------------|---------------------------------|
| Name           | RFN-14-C   | Rack Pos.    |               | Instrument | QTOF    | Operator          |                                 |
| Inj. Vol. (ul) | 2          | Plate Pos.   |               | IRM Status | Success |                   |                                 |
| Data File      | RFM-14-C.d | Method (Acq) | GCN-NORMAL1.m | Comment    |         | Acq. Time (Local) | 09-11-2022 18:22:28 (UTC-08:00) |

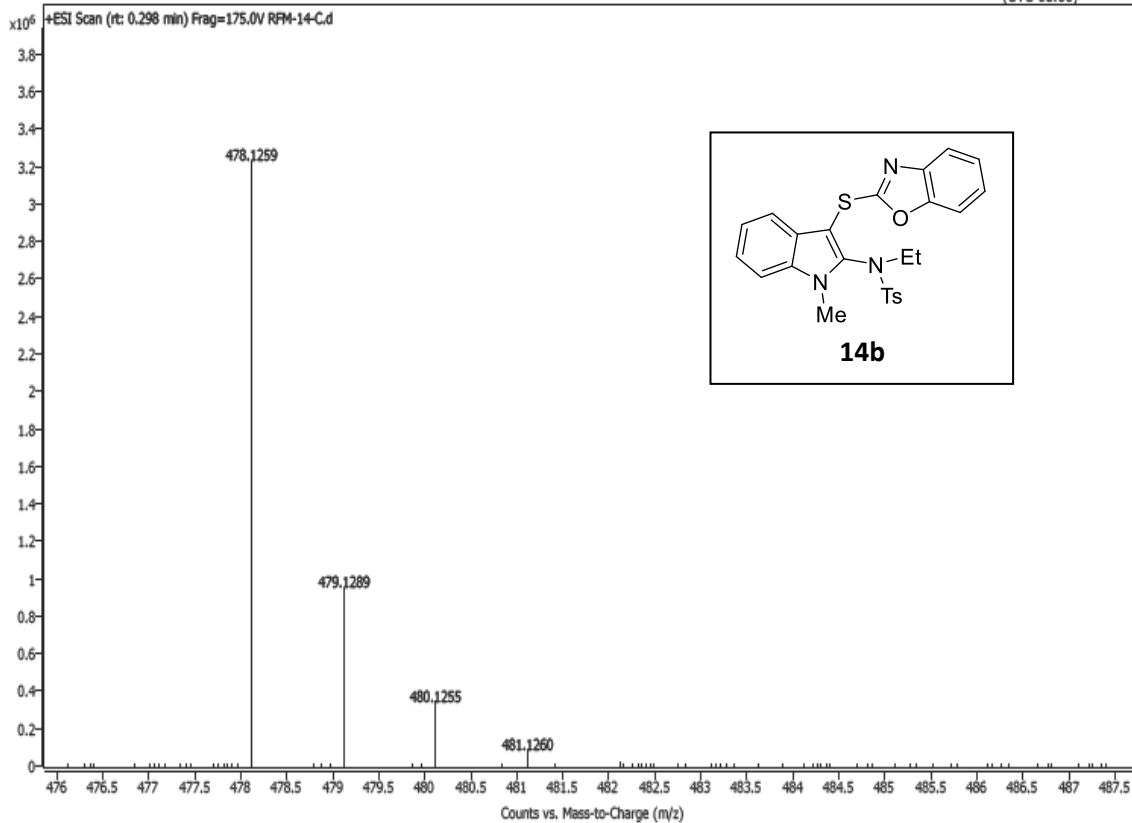

# N-{1-Benzyl-3-[(1H-imidazol-2-yl)sulfanyl]-1H-indol-2-yl}-N-benzenecarbonyl-4-methylbenzenesulfonamide (14c)

## User Spectrum Plot Report

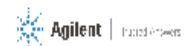

|                |            |              |               |            |         |                   |                                 |
|----------------|------------|--------------|---------------|------------|---------|-------------------|---------------------------------|
| Name           | RFN-14-D   | Rack Pos.    |               | Instrument | QTOF    | Operator          |                                 |
| Inj. Vol. (ul) | 2          | Plate Pos.   |               | IRM Status | Success |                   |                                 |
| Data File      | RFM-14-D.d | Method (Acq) | GCN-NORMAL1.m | Comment    |         | Acq. Time (Local) | 09-11-2022 18:24:12 (UTC-08:00) |

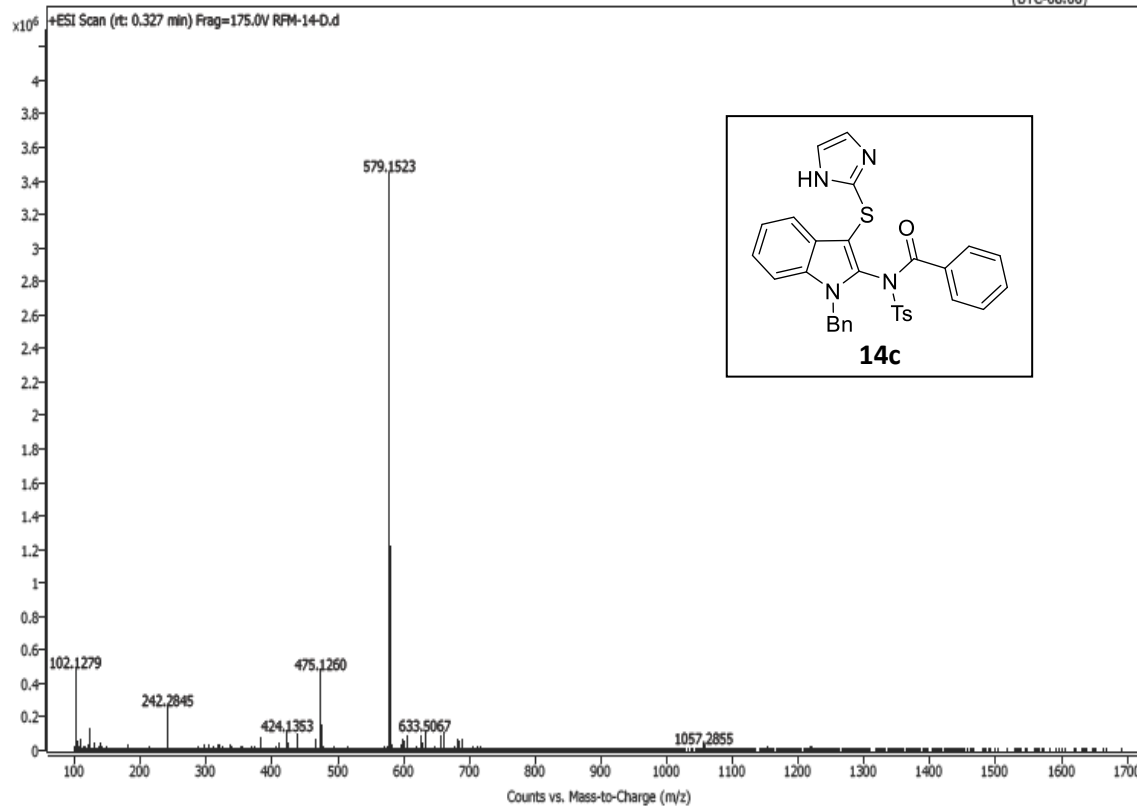

Supplement: d2nj04964c1.pdf [file d2nj04964c1.pdf]
